# Supplementary material
Source: PubMed Central journal article supplement (PMC7610524)

# **Expanding the antibacterial selectivity of polyether ionophore antibiotics through diversity focused semi-synthesis**

Shaoquan Lin<sup>1,‡</sup>, Han Liu<sup>1,‡</sup>, Esben B. Svenningsen<sup>1</sup>, Malene Wollesen<sup>1</sup>, Kristian M. Jacobsen<sup>1</sup>, Frederikke D. Andersen<sup>2</sup>, Jaime M. Villameriel<sup>1</sup>, Christine N. Pedersen<sup>1</sup>, Peter Nørby<sup>1</sup>, Thomas Tørring<sup>2</sup>,  
Thomas B. Poulsen<sup>1,\*</sup>

<sup>1</sup> Department of Chemistry, Aarhus University, Langelandsgade 140, DK-8000, Aarhus C, Denmark.

<sup>2</sup> Department of Engineering – Microbial Biosynthesis, Aarhus University, Gustav Wieds Vej 10, DK-8000, Aarhus C, Denmark

\*e-mail: thpou@chem.au.dk

‡ These authors contributed equally

## **Supplementary Information**

|                                                      |           |
|------------------------------------------------------|-----------|
| <b>SUPPLEMENTARY FIGURES</b>                         | <b>3</b>  |
| <b>X-RAY CRYSTALLOGRAPHY</b>                         | <b>12</b> |
| <b>MORPHOLOGICAL PROFILING IMAGING SETTINGS</b>      | <b>18</b> |
| <b>SYNTHESIS PROTOCOLS AND CHARACTERIZATION DATA</b> | <b>19</b> |
| <b>REFERENCES</b>                                    | <b>55</b> |
| <b>NMR-SPECTRA</b>                                   | <b>56</b> |

## Supplementary Figures

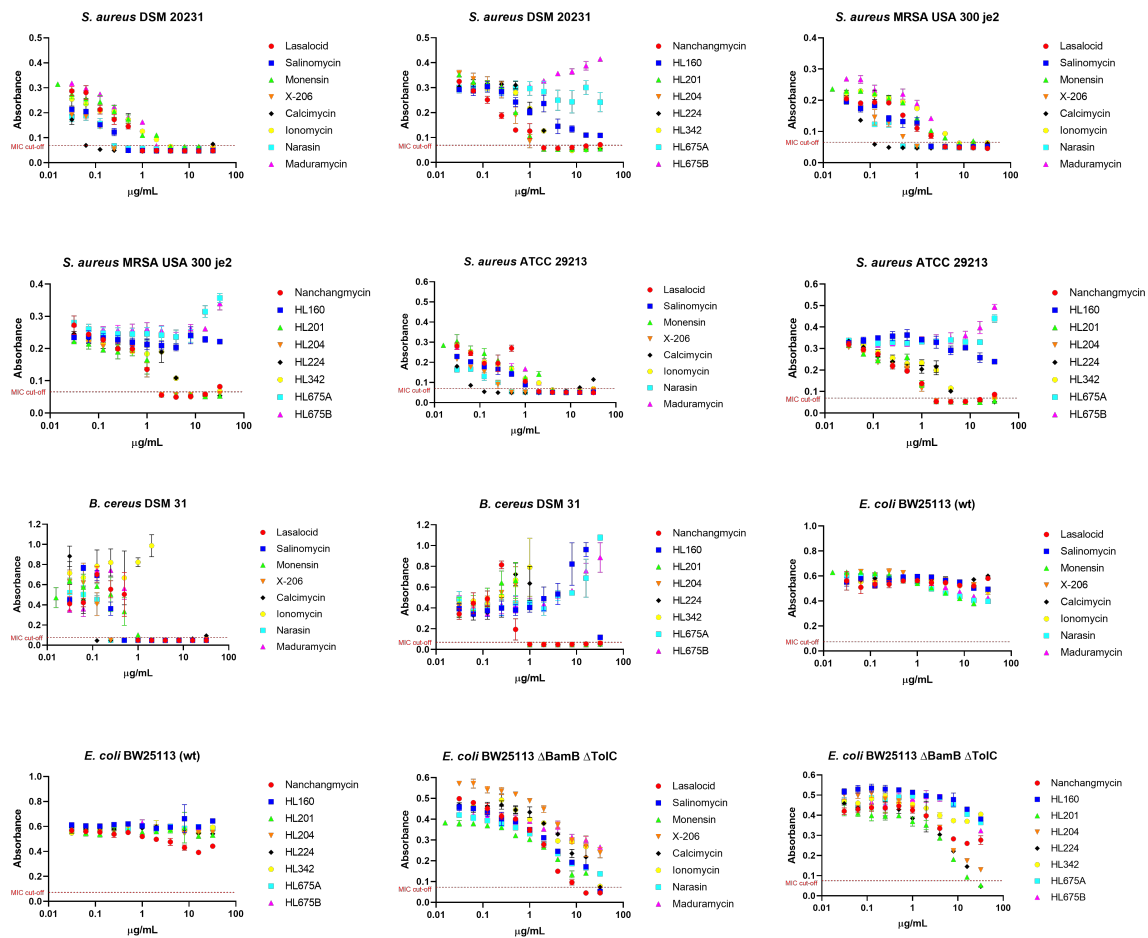

**Fig. 1.** Representative response curves for MIC determination in *S. aureus* DSM 20231, *S. aureus* MRSA USA 300 je2, *S. aureus* ATCC 29213, and *B. cereus* DSM 31. Bacteria with the density  $5 \times 10^5$  CFU/mL were treated with serial dilutions of compounds in DMSO in 96-well microtiter plates for 20-24 hours at 37 °C. The MIC values were determined from absorbance measurements at 600 nm where absorbances below 0.07 indicates complete inhibition of bacterial growth. For *B. cereus* DSM 31, pellicle formation was observed resulting in the large standard deviations and high absorbance values for concentrations with growth. The control, vancomycin, is omitted from the plots. Individual data points are mean  $\pm$  s.d. ( $N = 3$ , independent wells). Error bars smaller than the symbol size are not drawn. For the complete MIC data set, see Supplementary Table 1.

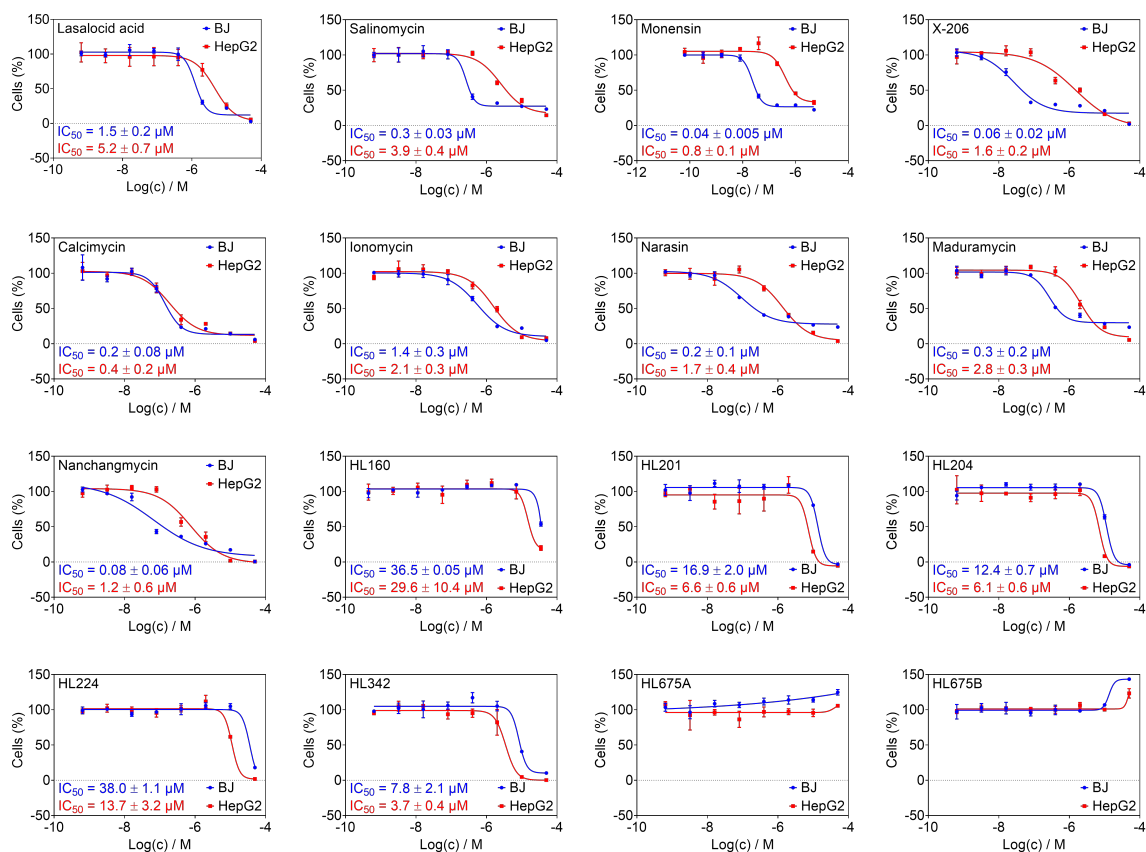

**Fig. 2.** Representative dose response curves in HepG2 and BJ cells after 48 h of treatment. Cells were seeded in 96-well plates (HepG2: 2000 cells/well and BJ: 1500 cells/well). Twenty-four hours after seeding cells were treated with serial dilutions of compounds in DMSO for 48 hours. The viability was determined by adding CellTiter Blue (20  $\mu$ L/well, Promega, Cat#: G8081) to each well in the final 1.5 hours of incubation and ultimately quantifying viability as a measure of fluorescence in a Tecan SPARK 10M plate reader (552  $\pm$  10 nm excitation; 598  $\pm$  10 nm emission). Individual data points on the plots are mean  $\pm$  s.d. ( $N = 3$ , independent wells). Error bars smaller than the symbol size are not drawn. The  $IC_{50}$  values listed on the graphs are mean  $\pm$  s.d of two independent biological determinations for all compounds except ionomycin, which are mean  $\pm$  s.d of three independent biological determinations. For the complete cell viability data in mammalian cell lines, see Supplementary Table 1.

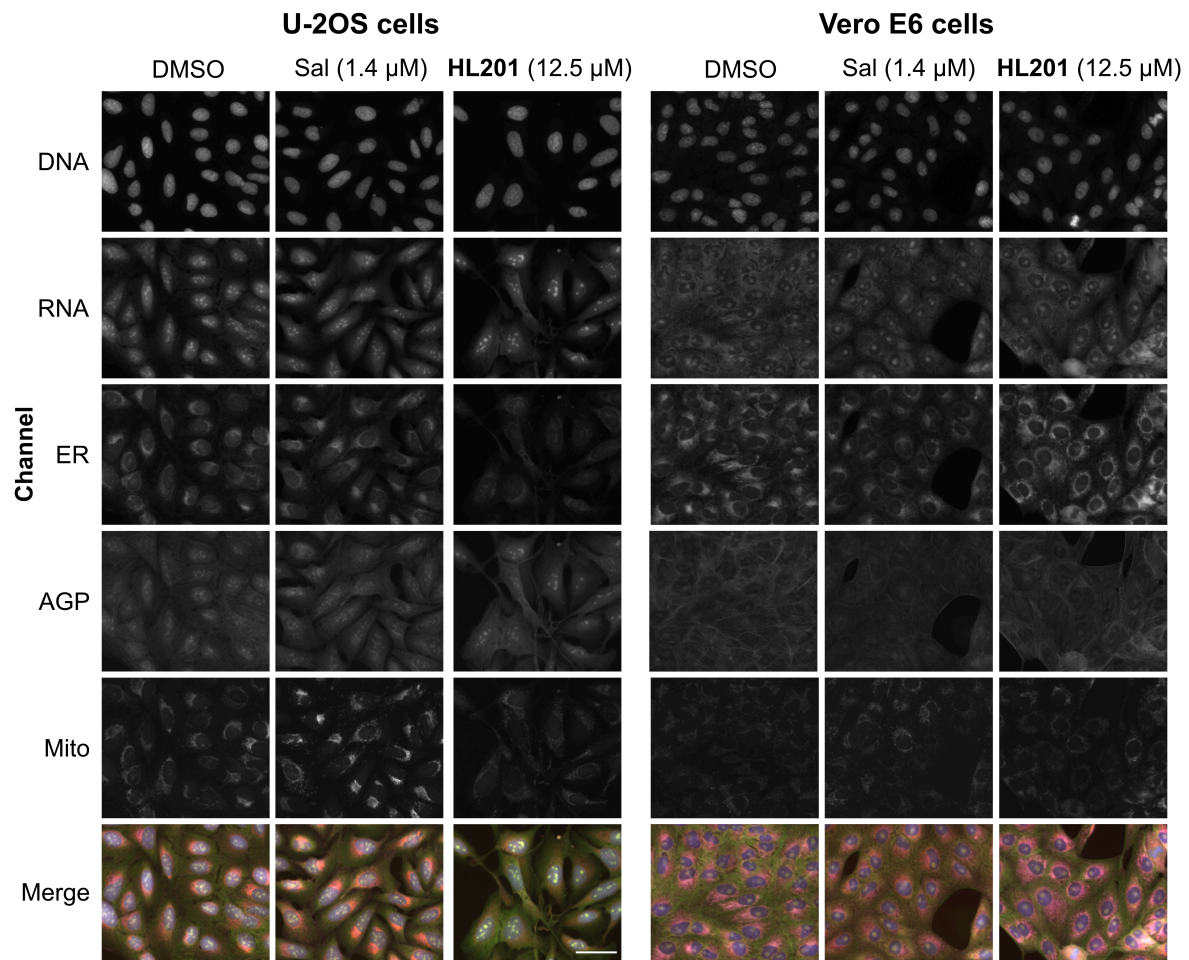

**Fig. 3** Representative crops of images from the morphological profiling. Images are shown for DMSO treatment, 1.4  $\mu$ M Salinomycin and 12.5  $\mu$ M **HL201** treatment. Scalebar: 50  $\mu$ M. See the methods section for description of fluorophores in the different channels. Merge: DNA (blue), RNA (yellow), ER (magenta), AGP (green), Mito (red). Images were acquired at 9 sites in each of four distinct wells for each biological replicate (36 images per treatment). Images are shown in the full dynamic range.

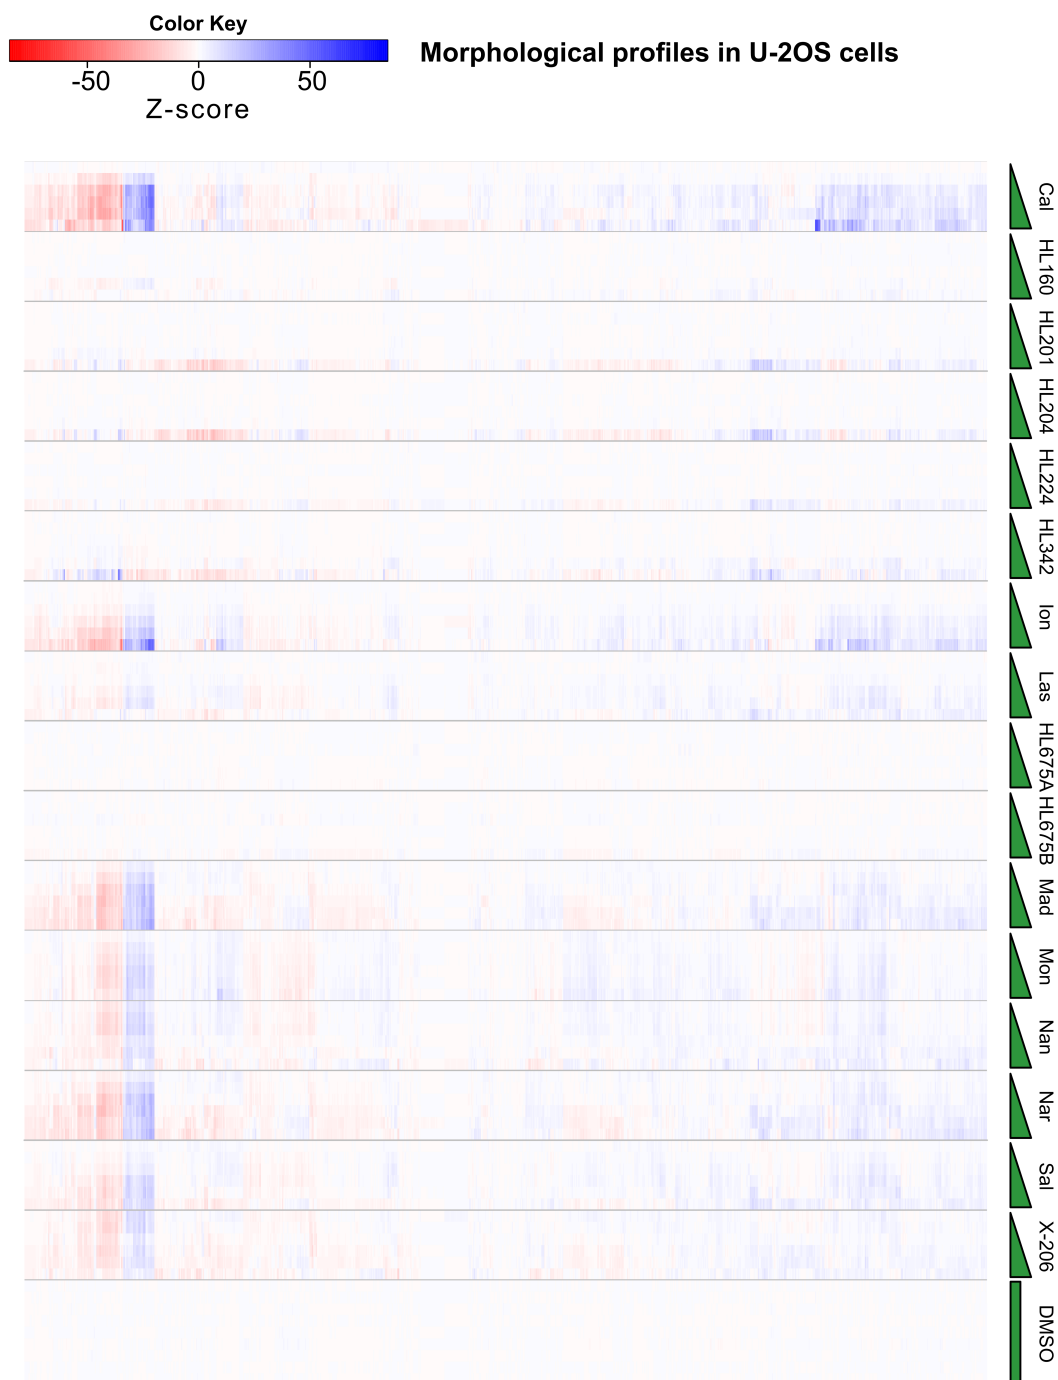

**Fig. 4** Heatmap of morphological profiles in U-2OS cells. Compounds are dosed as a 6-point 3-fold dilution series starting from 12.5  $\mu\text{M}$ , except monensin (Mon) which starts at 4.2  $\mu\text{M}$ .

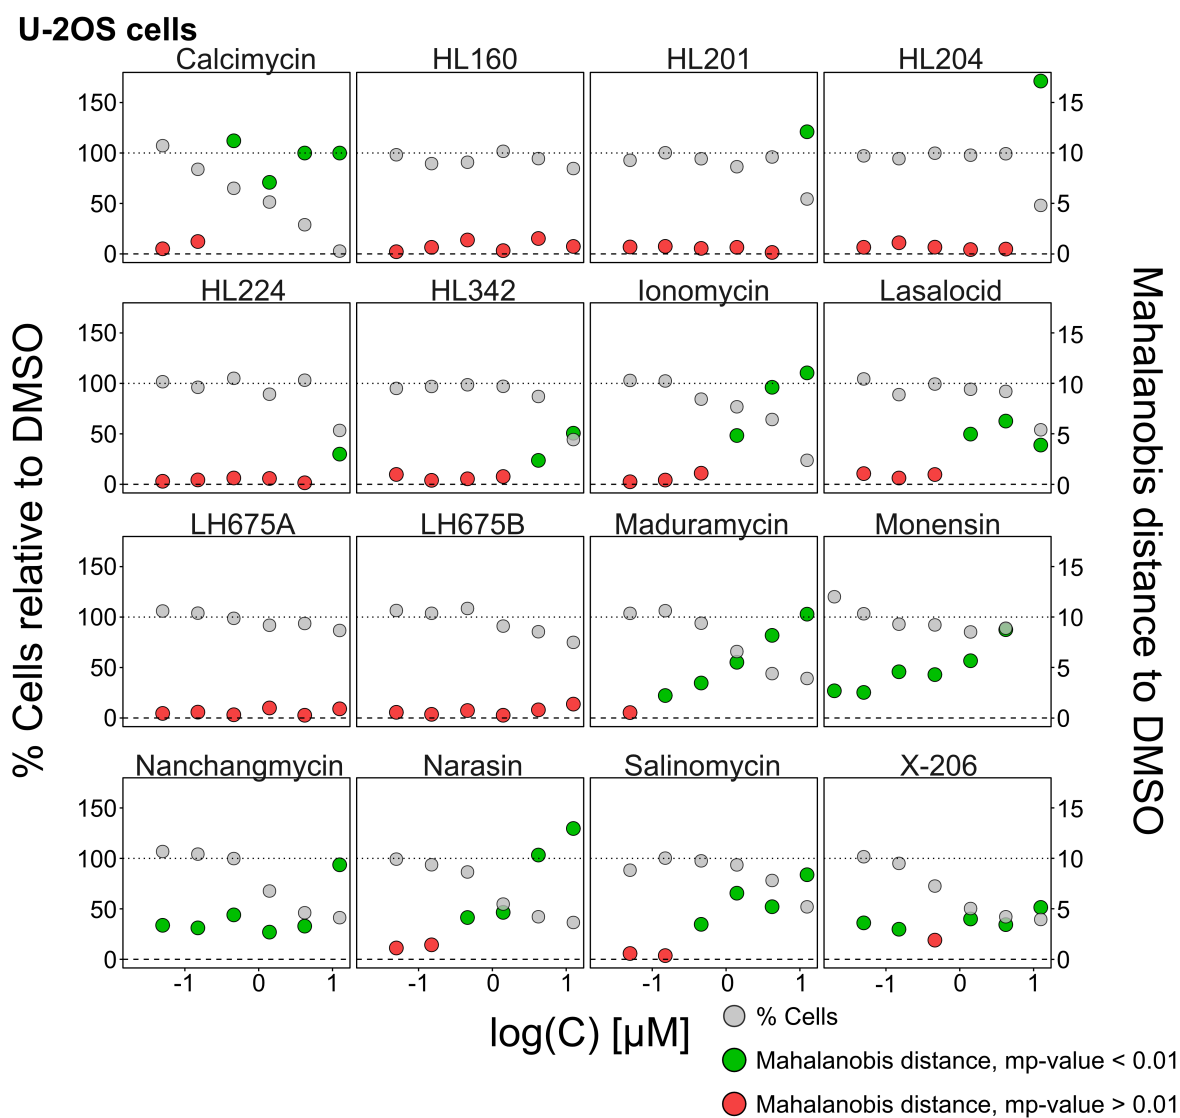

**Fig. 5** Cell counts and Mahalanobis distances from morphological profiling in U-2OS cells. The points for the Mahalanobis distance are coloured based on the mp-value. Active profiles are observed for most ionophores before a significant drop in cell viability is observed while activities for synthetic ionophores are accompanied with a decrease in viability. Note that X-206 at 0.46  $\mu\text{M}$  falls below the activity threshold, but the profile is still contained in the “high concentration” cluster in Supplementary Fig. 6.

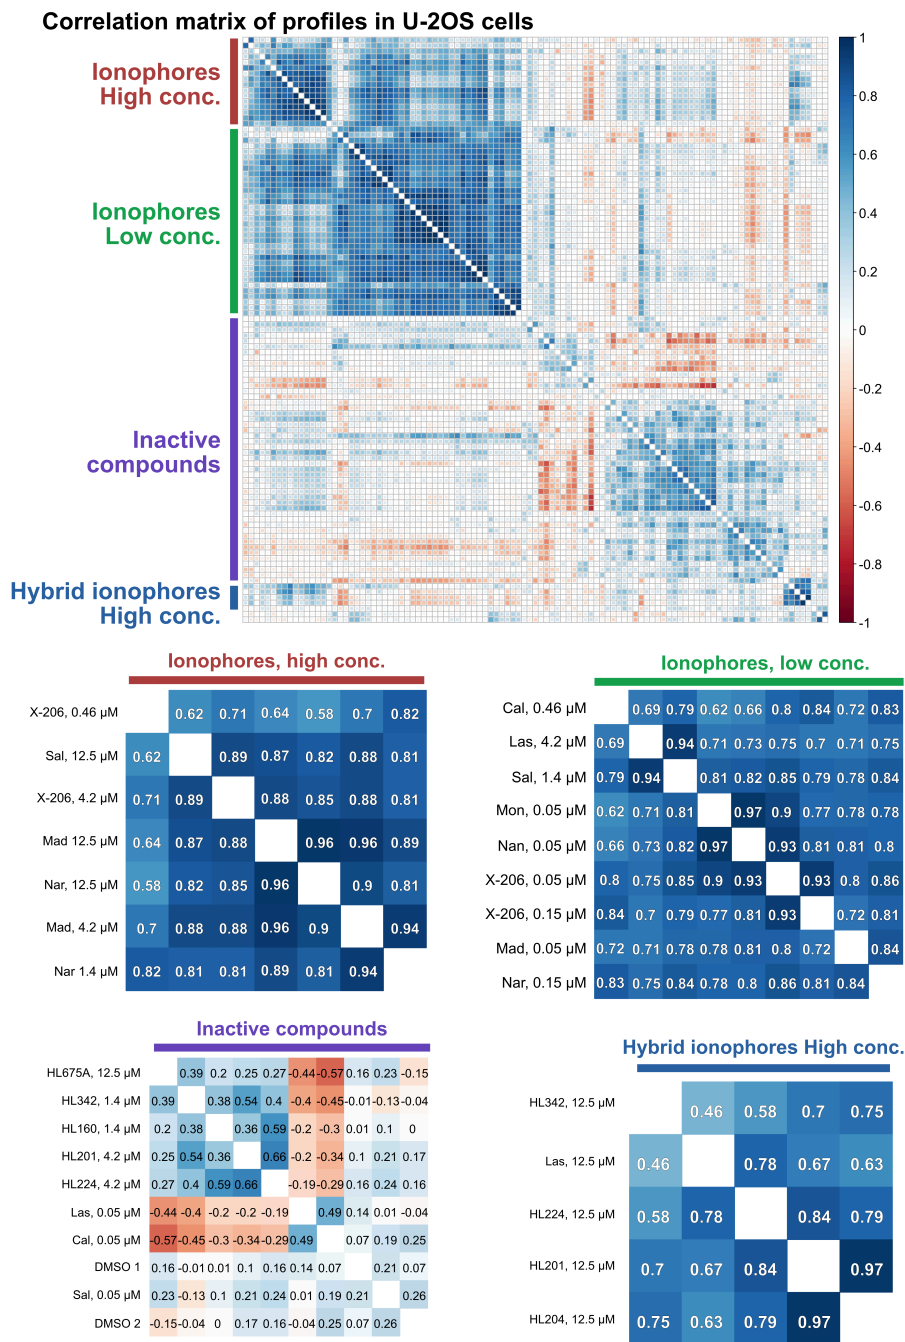

**Fig. 6.** Top: Correlation matrix (pearson correlations) for all morphological profiles in U-2OS cells. In general, four clusters are observed which contains: High concentrations of ionophores, generally related to loss of cells; low concentrations of ionophores, before loss of cells is observed; inactive profiles with mp-value > 0.01; high concentrations of hybrid ionophores associated with low cell viability. Interestingly Lasalocid at 12.5  $\mu\text{M}$  is also contained in last cluster, but this is probably related to cell death. The full correlation matrix with compound annotations is available on Mendeley Data. Bottom: Selected correlations for some of the clusters observed in the full correlation matrix.



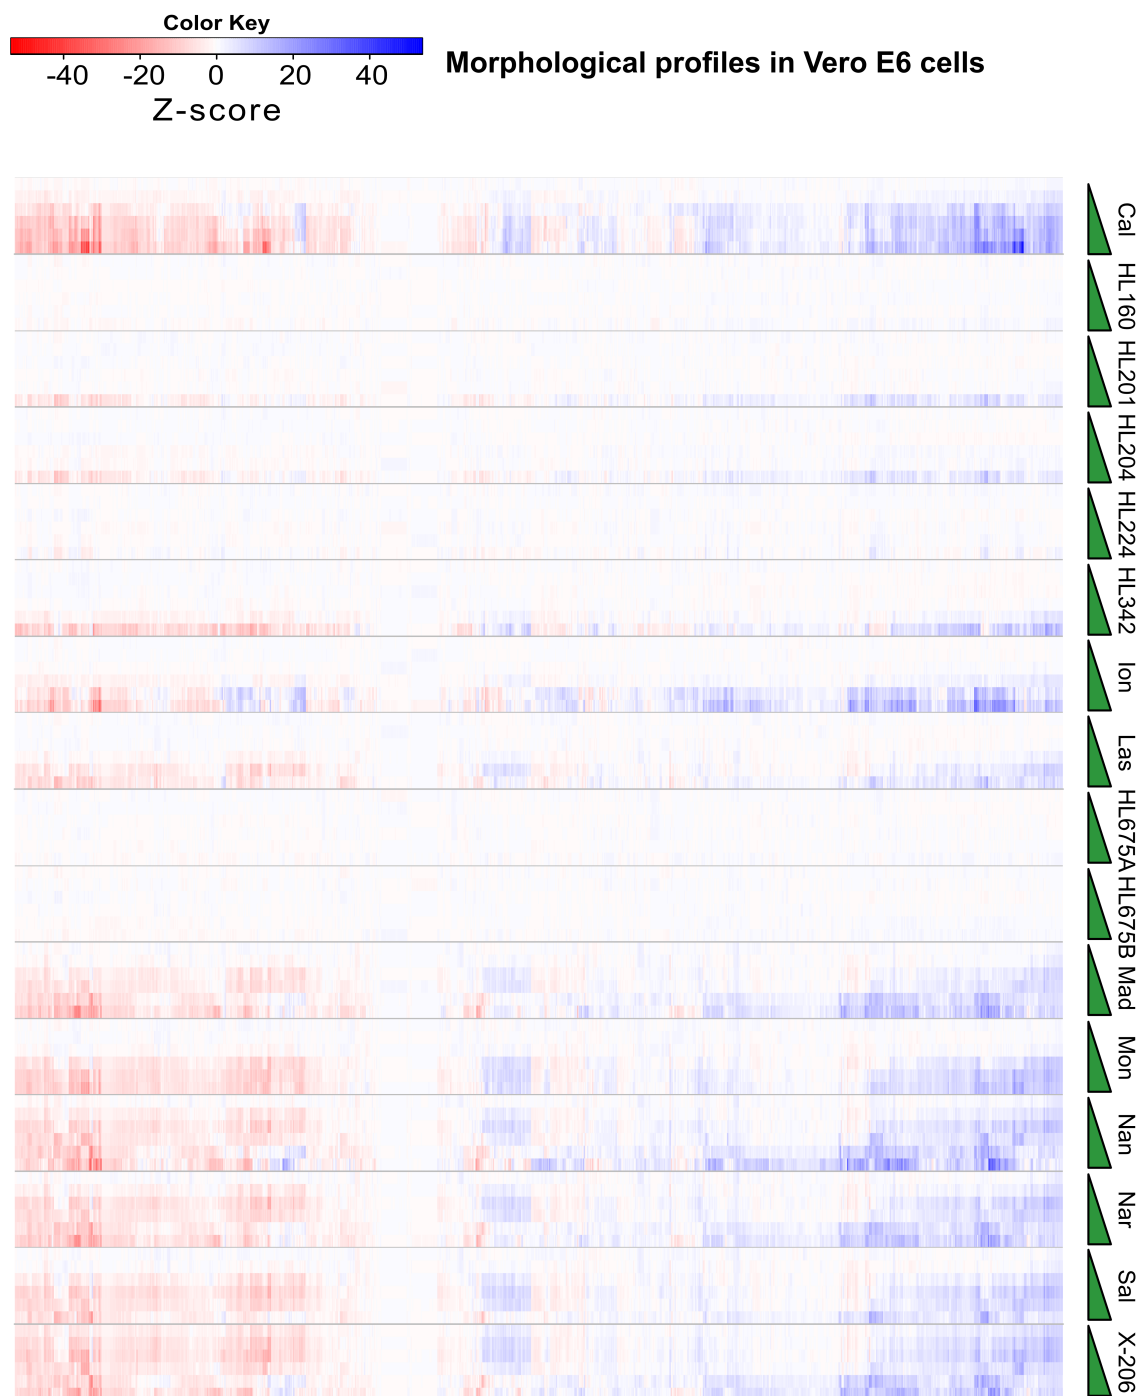

**Fig. 7** Heatmap of morphological profiles in Vero E6 cells. Compounds are dosed as a 6-point 3-fold dilutions series starting from 12.5  $\mu\text{M}$ , except monensin (Mon) which starts at 4.2  $\mu\text{M}$ .

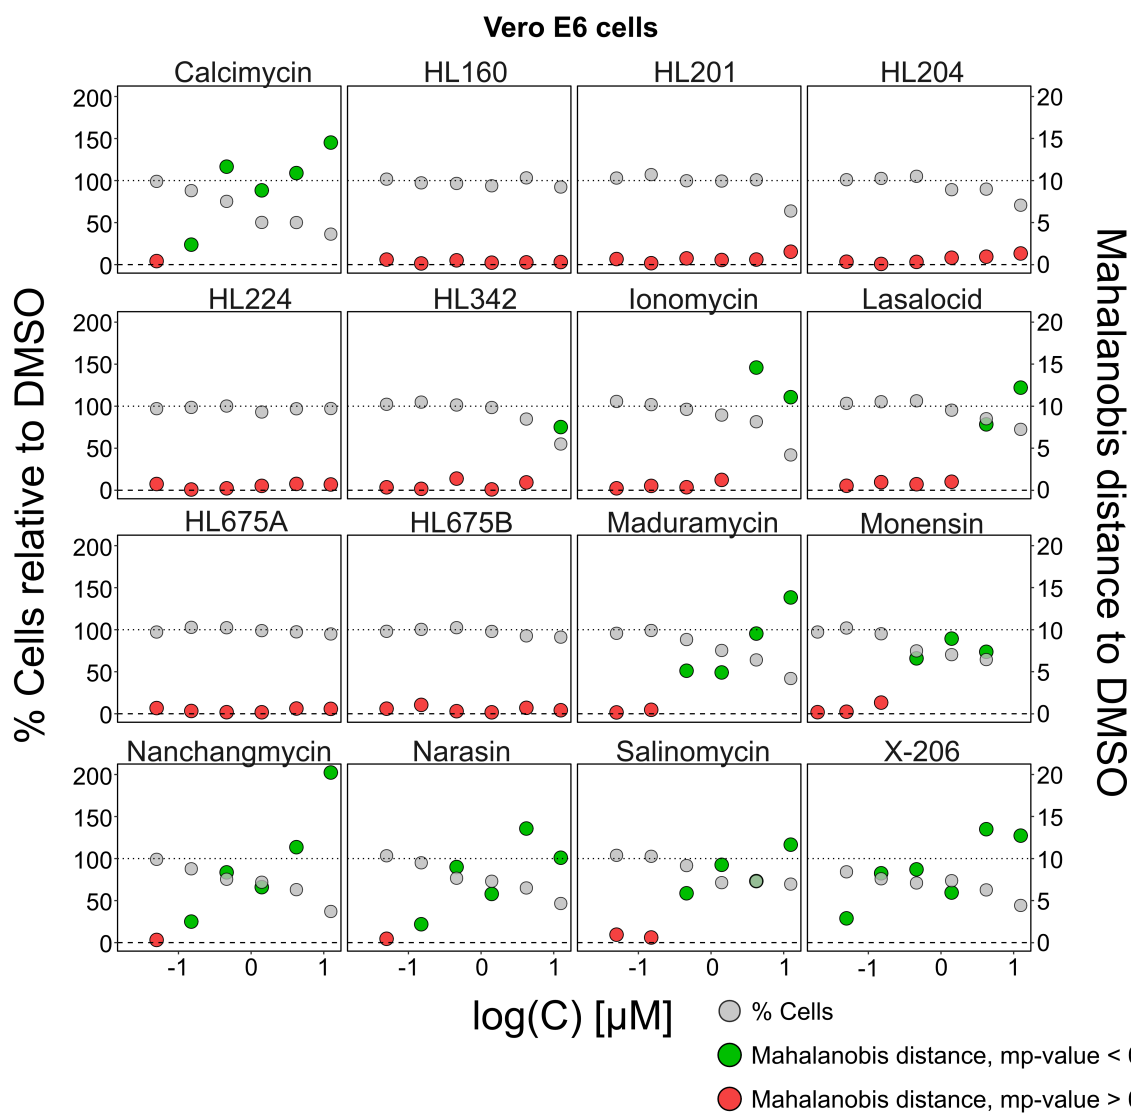

**Fig. 8** Cell counts and Mahalanobis distances from morphological profiling in Vero E6 cells. The points for the Mahalanobis distance are coloured based on the mp-value. Active profiles are observed for most ionophores before a significant drop in cell viability is observed. Only the profile for 12.5  $\mu\text{M}$  HL342 reaches mp-value < 0.01 while the highest concentration for HL201 and HL204 are close to reaching significance (mp-value 0.02 and 0.06 respectively).

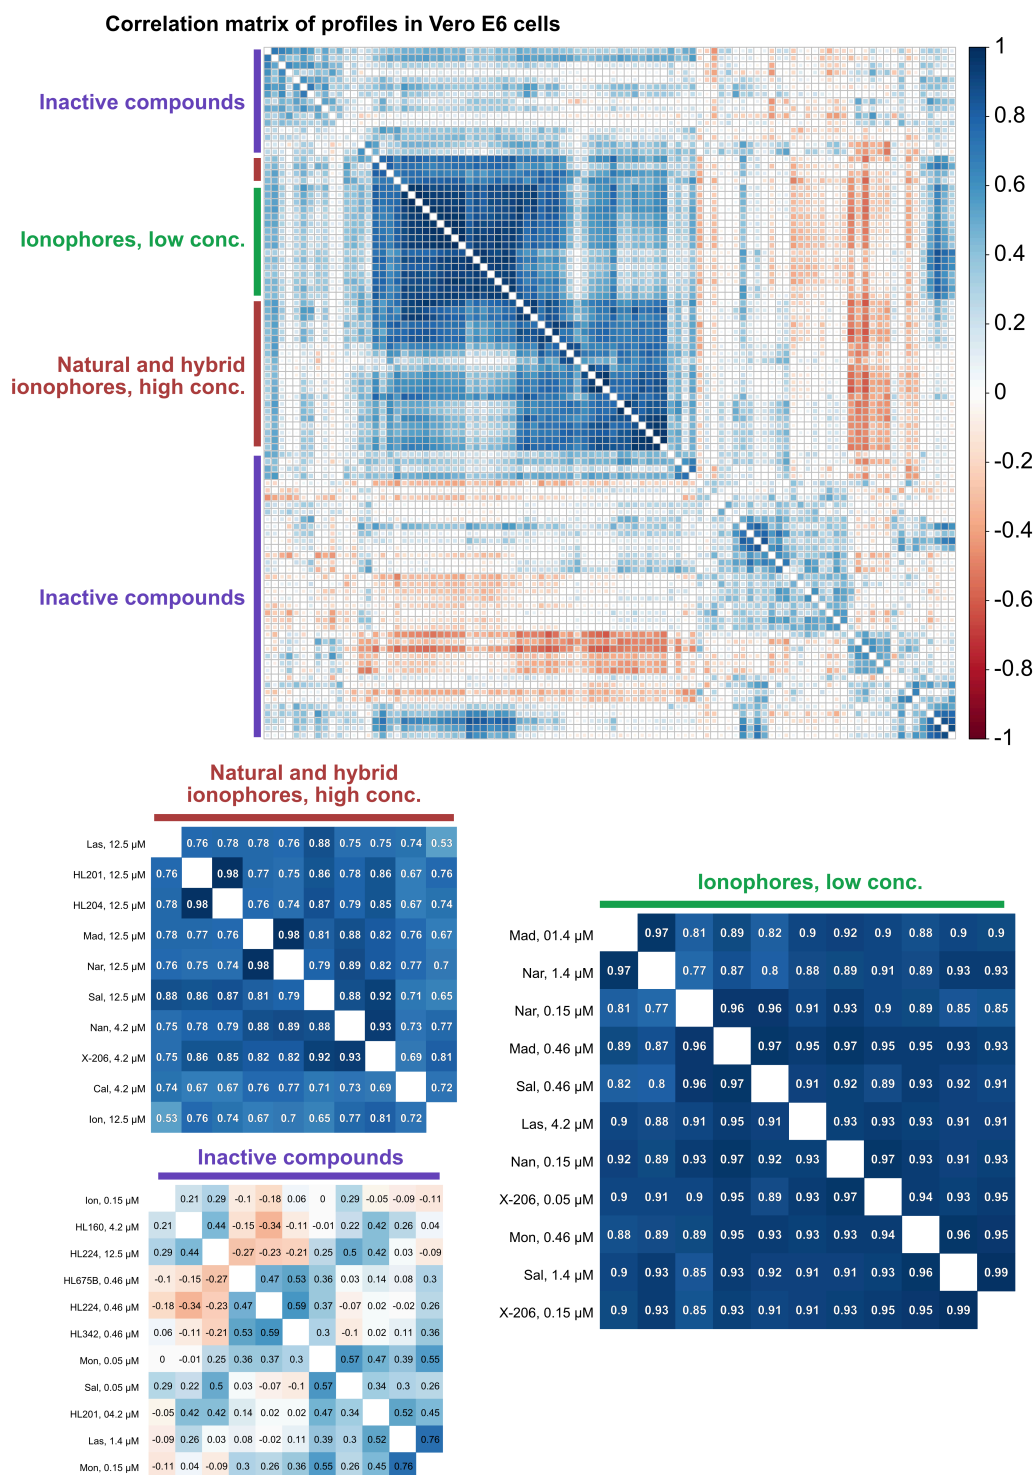

**Fig. 9** Top: Correlation matrix (pearson correlations) for all morphological profiles in Vero E6 cells. In general, the same clusters as in U-2OS cells (Supplementary Fig. 6) are found, however the high concentrations of both natural and hybrid ionophores are contained in the same cluster, most likely due to toxic effects. Bottom: Selected correlations for some of the clusters observed in the full correlation matrix.

## X-ray crystallography

### Crystal structure 6-Na, 14, 24 and 31-Na

Crystallographic single crystal X-ray data for three structures were collected on a Bruker Kappa *Apex2* diffractometer equipped with a Ag source (**6-Na**, **14** and **31-Na**). The crystals were cooled to 100(1) K using an Oxford Cryosystems liquid nitrogen Cryostream device. Crystallographic single crystal X-ray data for **24** was collected on a different Bruker Kappa *Apex2* diffractometer equipped with a Mo source at room temperature. Absorption correction for all four structures were done with SADABS. Cell refinement and data reduction were done in SAINT-plus.<sup>1</sup> The structures were solved and refined with SHELXT and SHELXL, respectively, in Olex2.<sup>2-4</sup>

### Crystal structure 29-Na

Crystallographic single crystal X-ray data was collected using an Oxford Diffraction Supernova instrument equipped with a Mo micro-focus X-ray source, an Atlas charge-coupled device detector, and a four-circle goniometer. The crystal was cooled to 100(1) K using an Oxford Cryosystems liquid nitrogen Cryostream device. The intensities were empirically corrected for absorption using SCALE3 ABSPACK implemented in CrysAlisPRO.<sup>5</sup> The unit cell parameters were determined, and the Bragg intensities were integrated using CrysAlisPRO. The structure was solved and refined with SHELXT and SHELXL, respectively, in Olex2.<sup>2-4</sup>

The X-ray crystallography data have been deposited in the Cambridge Crystallographic Data Centre (CCDC) using the following identifiers ([www.ccdc.cam.ac.uk/structures/](http://www.ccdc.cam.ac.uk/structures/)): 1920656 (compound 6-Na), 1920657 (compound 14), 1920658 (compound 24), 1920659 (compound 29-Na) and 1920660 (compound 31-Na).

Crystallographic details:

|                                            | <b>6-Na</b>          | <b>14</b>     | <b>24</b>     | <b>29-Na</b>         | <b>31-Na</b>                             |
|--------------------------------------------|----------------------|---------------|---------------|----------------------|------------------------------------------|
| Molecular formula                          | C38 H58 Cl Na<br>O10 | C14 H24<br>O3 | C34 H60<br>O8 | C38 H58 Br Na<br>O10 | C38 H58 Cl Na<br>O10,<br>2(C2 H3 N), H2O |
| Formula weight                             | 733.28               | 240.33        | 596.82        | 777.74               | 833.4                                    |
| Crystal system                             | orthorhombic         | monoclinic    | monoclinic    | orthorhombic         | orthorhombic                             |
| Space Group                                | P 21 21 21           | P 1 21 1      | P 1 21 1      | P 21 21 21           | P 21 21 21                               |
| a (Å)                                      | 17.3673              | 8.5919        | 8.8767        | 17.5111              | 11.9272                                  |
| b (Å)                                      | 18.6159              | 9.104         | 10.3495       | 18.5108              | 13.616                                   |
| c (Å)                                      | 53.386               | 9.673         | 19.4472       | 53.5509              | 27.774                                   |
| $\alpha$ (°)                               | 90                   | 90            | 90            | 90                   | 90                                       |
| $\beta$ (°)                                | 90                   | 114.391       | 91.299        | 90                   | 90                                       |
| $\gamma$ (°)                               | 90                   | 90            | 90            | 90                   | 90                                       |
| Volume (Å <sup>3</sup> )                   | 17260                | 689.1         | 1786.14       | 17358.2              | 4510.7                                   |
| Z                                          | 16                   | 2             | 2             | 16                   | 4                                        |
| T (K)                                      | 100                  | 100           | 296           | 100                  | 100                                      |
| $\rho$ (g cm <sup>-3</sup> )               | 1.129                | 1.158         | 1.11          | 1.19                 | 1.227                                    |
| $\lambda$ (Å)                              | 0.56086              | 0.56086       | 0.71073       | 0.71073              | 0.56086                                  |
| $\mu$ (mm <sup>-1</sup> )                  | 0.084                | 0.05          | 0.077         | 1.006                | 0.087                                    |
| # measured refl                            | 110795               | 11684         | 28112         | 35203                | 25547                                    |
| # unique refl                              | 19216                | 2616          | 6640          | 17560                | 6250                                     |
| R <sub>int</sub>                           | 0.0694               | 0.0486        | 0.0273        | 0.0443               | 0.0474                                   |
| # parameters                               | 1834                 | 158           | 391           | 1759                 | 532                                      |
| R(F <sup>2</sup> ), all refl               | 0.0925               | 0.0511        | 0.0584        | 0.0977               | 0.0538                                   |
| R <sub>w</sub> (F <sup>2</sup> ), all refl | 0.2365               | 0.103         | 0.1278        | 0.2421               | 0.121                                    |
| Goodness of fit                            | 1.007                | 1.048         | 1.047         | 1.04                 | 1.045                                    |
| CCDC no.                                   | 1920656              | 1920657       | 1920658       | 1920659              | 1920660                                  |

Comments for crystal structure **6-Na**

The crystallographic structure refinement gave rise to one A-alert and two B-alerts. The alerts are commented in the cif file and reproduced here:

```

# start Validation Reply Form
_vrf_THETM01_20181203_shao_0m
;
PROBLEM: The value of sine(theta_max)/wavelength is less than 0.550
RESPONSE: The long-range order of crystal was the not good enough to give
scattering out to more than 0.5113 sin(theta)/lambda.
It is likely due to the disorder of solvent (acetonitrile), which do not affect the
absolute structure determination.
;
_vrf_PLAT241_20181203_shao_0m
;
PROBLEM: High 'MainMol' Ueq as Compared to Neighbors of C1 Check
RESPONSE: Data quality low, and the structure has both rigid and flexible units.
;
_vrf_PLAT340_20181203_shao_0m
;
PROBLEM: Low Bond Precision on C-C Bonds ..... 0.01749 Ang.
RESPONSE: The data quality does not allow refinement of disorder due to
displacement of the atoms.
;
# end Validation Reply Form

```

Comments for crystal structure 29-Na

The crystallographic structure refinement gave rise to two A-alerts and two B-alerts. The alerts are commented in the cif file and reproduced here:

```

# start Validation Reply Form
_vrf_THETM01_exp_64
;
PROBLEM: The value of sine(theta_max)/wavelength is less than 0.550

```

RESPONSE: The long-range order of crystal was the not good enough to give scattering out to more than  $0.5001 \sin(\theta)/\lambda$ .

It is likely due to the disorder of solvent(acetonitrile) and large number of degrees of freedom in the fragments that are around the sodium atoms. However, the absolute configuration is not affected by this disorder. Furthermore, it was observed that the crystals decomposes when taken out of the mother liquor.

;

\_vrf\_PLAT027\_exp\_64

;

PROBLEM: \_diffn\_reflns\_theta\_full value (too) Low ..... 20.82 Degree

RESPONSE: The crystals decomposes when taken out of the mother liquor.

Hence, the crystal quality is poor and the crystals do not scatter to high q.

;

\_vrf\_PLAT090\_exp\_64

;

PROBLEM: Poor Data / Parameter Ratio (Zmax > 18) ..... 5.65 Note

RESPONSE: The crystal quality and the size of the unit cell give rise to this poor ratio.

;

\_vrf\_PLAT341\_exp\_64

;

PROBLEM: Low Bond Precision on C-C Bonds ..... 0.02374 Ang.

RESPONSE: The poor crystal quality gives a high degree of disorder in the crystal structure. Hence, precise determination of bonds is not possible.

;

# end Validation Reply Form

### Comments for crystal structure 31-Na

The crystallographic structure refinement gave rise to one B-alert. The alerts are commented in the cif file and reproduced here:

# start Validation Reply Form

\_vrf\_THETM01\_20181024\_shao\_0m

;

PROBLEM: The value of  $\sin(\theta_{\max})/\lambda$  is less than 0.575

RESPONSE: The long-range order of crystal was not good enough to give scattering out to more than  $0.5568 \sin(\theta)/\lambda$ . It is likely due to large number of degrees of freedom in the fragments that are around the sodium atoms. Hence, bond distances might be affected. However, the absolute positions of the atoms are not affected by this kind of disorder.

;

# end Validation Reply Form



Ellipsoid structures:

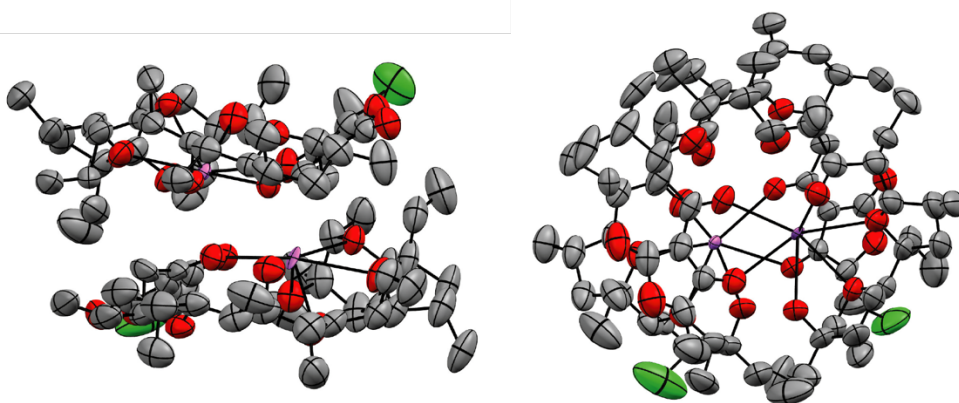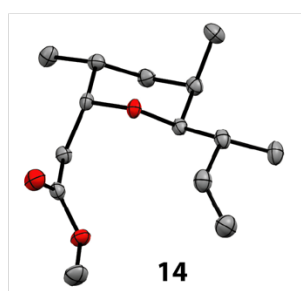

6-Na

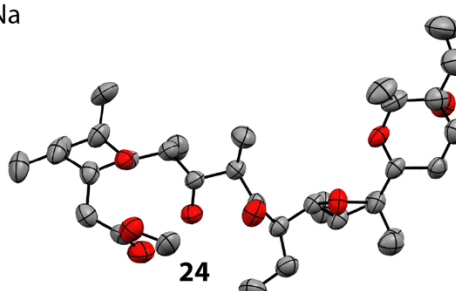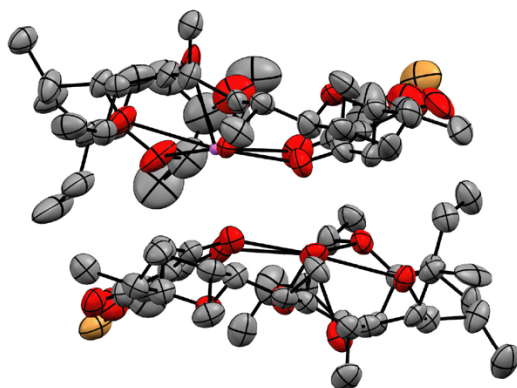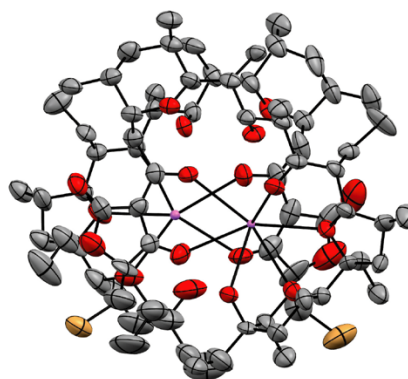

29-Na

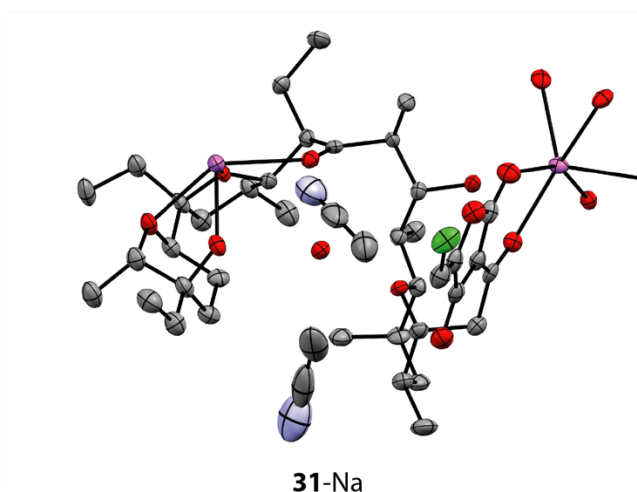

## Morphological profiling imaging settings

The following imaging settings were used on a Zeiss Celldiscoverer 7 microscope:

| Channel | Dyes                                                   | Excitation<br>LED | Beamsplitter                  | Emission filter                              |
|---------|--------------------------------------------------------|-------------------|-------------------------------|----------------------------------------------|
| DNA     | Hoechst 33342                                          | 385 nm            | RTBS 405 + 493<br>+ 610       | TBP 425/30 +<br>524/50 + 688/154             |
| ER      | Concanavalin-AF488                                     | 470 nm            | RTBS 405 + 493<br>+ 610       | TBP425/30 +<br>524/50 + 688/145              |
| RNA     | SYTO 14 green fluorescent<br>nucleic acid stain        | 511 nm            | RTBS 450 + 538<br>+ 610       | TBP 467/24 +<br>555/25 + 687/145             |
| AGP     | Phalloidin-AF568 +<br>Wheat-germ aggluti-<br>nin-AF555 | 567 nm            | RQBS 405 + 493<br>+ 575 + 653 | QBP 425/30 +<br>514/30 + 592/25<br>+ 709/100 |
| Mito    | MitoTracker Deep Red                                   | 625 nm            | RQBS 405 + 493<br>+ 575 + 653 | QBP 425/30 +<br>514/30 + 592/25<br>+ 709/100 |

## Synthesis protocols and characterization data

### (*R*)-4-((2*S*,3*S*,5*S*)-5-ethyl-5-((2*R*,5*R*,6*S*)-5-ethyl-5-hydroxy-6-methyltetrahydro-2*H*-pyran-2-yl)-3-methyltetrahydrofuran-2-yl)hexan-3-one (**4**):

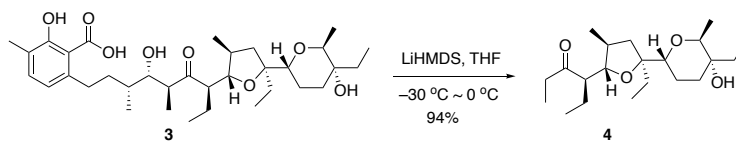

Lasalocid acid **3** was extracted from the commercial product Bovatec. To a solution of the Lasalocid acid (11.8 g, 20 mmol, 1 eq.) in 200 mL of THF was added LiHMDS (120 mL, 1.0 M in THF, 6 eq.) slowly at -30 °C under Ar. The resulting mixture was slowly warmed to 0 °C and stirred for 6 d. It was quenched with sat. NH<sub>4</sub>Cl and extracted with ether. The combined organic phases were washed with brine and dried with Na<sub>2</sub>SO<sub>4</sub>. The solvent was removed, and the crude mixture was purified by flash column chromatography to afford the product **4** as a pale yellow oil (6.64 g, 94%).

R<sub>f</sub>: 0.22 (EtOAc/pentane 1:9).

<sup>1</sup>H NMR (400 MHz, CDCl<sub>3</sub>): δ 3.76 (q, *J* = 6.9 Hz, 1H), 3.57 – 3.54 (m, 1H), 3.49 – 3.46 (m, 1H), 2.63 – 2.53 (m, 3H), 2.44 (dq, *J* = 18.4, 7.2 Hz, 1H), 2.02 – 1.92 (m, 1H), 1.83 (dd, *J* = 12.5, 8.1 Hz, 1H), 1.78 – 1.69 (m, 1H), 1.66 – 1.25 (m, 10H), 1.19 (d, *J* = 6.9 Hz, 3H), 1.00 (t, *J* = 7.2 Hz, 3H), 0.89 (m, 6H), 0.81 (t, *J* = 7.4 Hz, 6H).

<sup>13</sup>C NMR (101 MHz, CDCl<sub>3</sub>): δ 214.1, 86.0, 84.4, 77.0, 73.0, 71.1, 57.6, 40.8, 37.4, 37.0, 30.5, 29.4, 28.7, 21.4, 21.2, 16.8, 14.2, 12.6, 8.2, 7.5, 6.6.

### (2*R*,4*R*)-5-((*tert*-Butyldimethylsilyloxy)-2,4-dimethylpentan-1-ol (**10**):

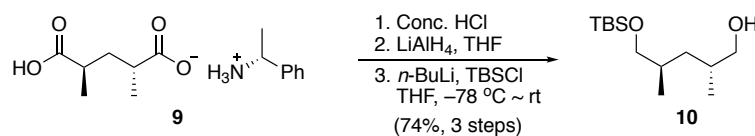

The optically active salt **9** (5.39 g, 19.2 mmol, 1.0 eq.) was dissolved in conc. HCl (50 mL), and the resulting clear solution was stirred for 5 mins before solvent was removed. The residue was extracted with ether. The combined organic layers were dried with Na<sub>2</sub>SO<sub>4</sub>, and then solvent was removed. The crude product was used directly in the next step.

The crude product was dissolved in 120 mL dry THF under Ar and cooled to 0 °C, LiAlH<sub>4</sub> (2.91 g, 76.8 mmol, 4 eq.) was added in small portions. Then the mixture was warmed to

room temperature and stirred overnight. It was quenched with water (2.91 g), 10% NaOH (2.91 g), and water (8.73 g). The white precipitate was filtered off and washed with EtOAc. The crude product was used directly in the next step.

To a solution of crude diol in dry THF (35 mL) at -78 °C under Ar, *n*-BuLi (7.3 mL, 2.5 N, 0.95 eq.) was added dropwise and the resulting solution was stirred for 1 h at -78 °C. Then, a solution of TBSCl (2.75 g, 18.2 mmol, 0.95 eq.) in THF (5 mL) was added rapidly, and the resulting mixture was stirred at -78 °C for 10 min before it was warmed to room temperature and stirred for another 3 h. The reaction mixture was quenched with sat. NH<sub>4</sub>Cl and extracted with ether. The combined organic layers were washed with brine and dried with Na<sub>2</sub>SO<sub>4</sub>. Then the solvent was removed and the crude product was purified by flash column chromatography to yield the product **10** as a clear oil (3.48 g, 74%).

R<sub>f</sub>: 0.25 (EtOAc/pentane= 1/9).

$[\alpha]_D^{296.6K} +18.6$  (c = 1, CHCl<sub>3</sub>).

IR  $\nu_{\max}$  (cm<sup>-1</sup>): 3308 (br), 2955, 2928, 2857, 1472, 1388, 1254, 1095, 1036.

<sup>1</sup>H NMR (400 MHz, CDCl<sub>3</sub>):  $\delta$  3.50 – 3.39 (m, 4H), 1.79 – 1.68 (m, 2H), 1.47 (s, 1H), 1.25 – 1.10 (m, 2H), 0.92 – 0.85 (m, 15H), 0.04 (s, 6H).

<sup>13</sup>C NMR (101 MHz, CDCl<sub>3</sub>):  $\delta$  69.2, 69.1, 37.0, 33.2, 33.1, 26.1, 18.5, 16.8, 16.6, -5.2.

HRMS (ESI) *m/z* [M+H]<sup>+</sup> calc. for C<sub>13</sub>H<sub>31</sub>O<sub>2</sub>Si: 247.2088; found 247.2092.

**(2*R*,4*R*)-5-((*tert*-butyldimethylsilyloxy)-2,4-dimethylpentanal (**11**):**

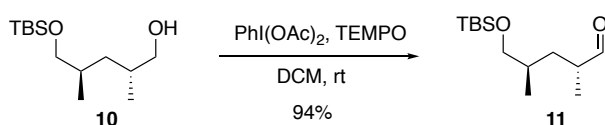

To a solution of mono-TBS protected diol **10** (3.48 g, 14.1 mmol, 1 eq.) in dry DCM (70 mL) under Ar, PhI(OAc)<sub>2</sub> (6.81 g, 21.2 mmol, 1.5 eq.) and TEMPO (443 mg, 2.82 mmol, 0.2 eq.) were added. The mixture was stirred until SM disappeared (6 h) at room temperature under Ar. Then, the reaction was quenched with aq. Na<sub>2</sub>S<sub>2</sub>O<sub>3</sub> and extracted with DCM. The combined organic phases were washed with sat. aq. NaHCO<sub>3</sub>, brine and dried over Na<sub>2</sub>SO<sub>4</sub>, filtered, and concentrated under reduced pressure. The crude product was purified by flash column chromatography to yield the aldehyde **11** as a clear oil (3.24 g, 94%).

R<sub>f</sub>: 0.50 (EtOAc/pentane = 1/19).

IR  $\nu_{\text{max}}$  (cm<sup>-1</sup>): 2956, 2929, 2857, 1728, 1462, 1252, 1093, 836, 765.

<sup>1</sup>H NMR (400 MHz, CDCl<sub>3</sub>):  $\delta$  9.62 (d, *J* = 2.0 Hz, 1H), 3.47 – 3.40 (m, 2H), 2.48 – 2.39 (m, 1H), 1.75 – 1.66 (m, 1H), 1.53 – 1.38 (m, 2H), 1.08 (d, *J* = 7.0 Hz, 3H), 0.89 – 0.87 (m, 12H), 0.04 (s, 6H).

<sup>13</sup>C NMR (101 MHz, CDCl<sub>3</sub>):  $\delta$  205.5, 68.3, 44.3, 34.1, 33.4, 26.1, 18.5, 16.6, 13.6, -5.3.

HRMS (ESI) *m/z* [M+H]<sup>+</sup> calc. for C<sub>13</sub>H<sub>29</sub>O<sub>2</sub>Si: 245.1931; found 245.1929.

**(3*R*,5*R*)-6-(But-3-en-2-yl)-3,5-dimethyltetrahydro-2*H*-pyran-2-one (12):**

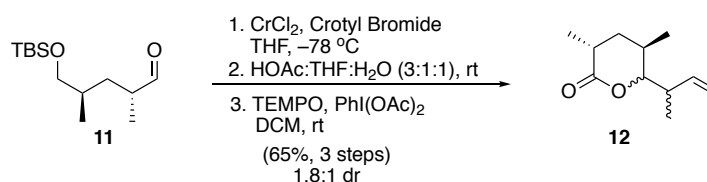

To CrCl<sub>2</sub> (3.613 g, 29.4 mmol, 4 eq.) at 0 °C under Ar was added dry THF (40 mL) with vigorous stirring. After 30 min, aldehyde **11** (1.796 g, 7.35 mmol, 1 eq.) in THF (4.0 mL) and 1-bromo-2-butene (2.27 mL, 22.1 mmol, 3 eq.) in THF (2 mL) were added dropwise. The mixture was stirred at 0 °C for 20 h after which it was poured into ice-cold water (150 mL) and extracted with ether. Then, the solvent was removed, and the crude mixture was used in the next step without further purification.

The crude mixture was dissolved in 10 mL of HOAc-THF-H<sub>2</sub>O (3:1:1) and was stirred until SM disappeared (overnight). The reaction mixture was diluted with water and quenched with solid NaHCO<sub>3</sub>. The mixture was extracted with ether and the combined organic phases were dried over Na<sub>2</sub>SO<sub>4</sub>, filtered, and concentrated under reduced pressure to afford a crude mixture that was used without further purification.

To a solution of the crude mixture in DCM (45 mL) at room temperature under Ar, TEMPO (230 mg, 1.47 mmol, 0.2 eq.) and PhI(OAc)<sub>2</sub> (4.735 g, 14.7 mmol, 2.0 eq) were added. After 12 h, the reaction mixture was partitioned between aq. Na<sub>2</sub>S<sub>2</sub>O<sub>3</sub> and DCM. The combined organic phases were washed with sat. aq. NaHCO<sub>3</sub>, brine and dried with Na<sub>2</sub>SO<sub>4</sub>, filtered, and concentrated under reduced pressure. The crude product mixture was purified by flash column

chromatography to obtain the product **12** as a clear oil (867 mg, 65%, *dr*: 1.8:1). NMR data are reported for the major diastereomer.

R<sub>f</sub>: 0.26 (EtOAc/pentane 1:9).

$[\alpha]_D^{296.6 K} +69.4$  (c = 1, CHCl<sub>3</sub>).

IR  $\nu_{\max}$  (cm<sup>-1</sup>): 3090, 2968, 2934, 2850, 1734, 1460, 1378, 1199, 1101, 989, 737.

<sup>1</sup>H NMR (400 MHz, CDCl<sub>3</sub>):  $\delta$  5.94 (ddd, *J* = 17.4, 10.4, 7.1 Hz, 1H), 5.15 – 5.05 (m, 2H), 4.02 (dd, *J* = 9.7, 2.6 Hz, 1H), 2.67 – 2.57 (m, 1H), 2.46 – 2.37 (m, 1H), 2.19 – 2.12 (m, 1H), 1.94 (ddd, *J* = 13.6, 7.2, 3.4 Hz, 1H), 1.68 (td, *J* = 12.8, 3.9 Hz, 1H), 1.29 (d, *J* = 7.1 Hz, 3H), 1.03 (d, *J* = 7.1 Hz, 3H), 1.00 (d, *J* = 6.9 Hz, 3H).

<sup>13</sup>C NMR (101 MHz, CDCl<sub>3</sub>):  $\delta$  174.2, 140.4, 115.1, 87.1, 39.5, 36.4, 31.3, 28.1, 18.0, 15.5, 10.8.

HRMS (ESI) *m/z* [M+Na]<sup>+</sup> calc. for C<sub>11</sub>H<sub>18</sub>O<sub>2</sub>Na: 205.1199; found 205.1209.

**(2*S*,3*R*,5*R*,6*S*)-6-((*R*)-But-3-en-2-yl)-3,5-dimethyltetrahydro-2*H*-pyran-2-yl acetate (**13**):**

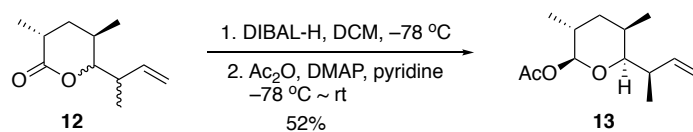

To a solution of lactone **12** (403 mg, 2.21 mmol, 1 eq.) in DCM (22 mL) under Ar was cooled to -78 °C, DIBAL-H (2.87 mL, 1.0 M in cyclohexane, 1.3 eq.) was added dropwise. After 5 h, acetic anhydride (2.07 mL, 22.1 mmol, 10 eq.), pyridine (1.43 mL, 17.7 mmol, 8 eq.), and DMAP (351 mg, 3.87 mmol, 1.3 eq.) were added. The reaction mixture was slowly warm to room temperature and stirred for overnight. Sat. aq. NH<sub>4</sub>Cl was added and the DCM was removed. The aqueous phase was extracted with Et<sub>2</sub>O. The combined organic layers were washed with sat. aq. Na<sub>2</sub>HPO<sub>4</sub> twice, NaH<sub>2</sub>PO<sub>4</sub> twice, and sat. aq. CuSO<sub>4</sub> twice. The organic phase was dried over Na<sub>2</sub>SO<sub>4</sub>, filtered, and concentrated under reduced pressure. The crude mixture was purified by column chromatography to afford the major product **13** as a clear solid (259 mg, 52%).

R<sub>f</sub>: 0.42 (EtOAc/pentane 1:15).

$[\alpha]_D^{296.8 K} -27.4$  (c = 1, CHCl<sub>3</sub>).

IR  $\nu_{\max}$  (cm<sup>-1</sup>): 3081, 2968, 2921, 1757, 1462, 1228, 1105, 1044, 902.

$^1\text{H}$  NMR (400 MHz,  $\text{CDCl}_3$ ):  $\delta$  5.92 (ddd,  $J = 17.1, 10.4, 6.3$  Hz, 1H), 5.22 (d,  $J = 9.2$  Hz, 1H), 5.07 – 4.96 (m, 2H), 3.27 (dd,  $J = 10.0, 2.2$  Hz, 1H), 2.36 – 2.25 (m, 1H), 2.11 (s, 3H), 1.88 – 1.83 (m, 2H), 1.74 – 1.69 (m, 1H), 1.45 (td,  $J = 13.2, 5.2$  Hz, 1H), 1.00 (d,  $J = 7.0$  Hz, 3H), 0.93 (d,  $J = 6.9$  Hz, 3H), 0.83 (d,  $J = 6.5$  Hz, 3H).

$^{13}\text{C}$  NMR (101 MHz,  $\text{CDCl}_3$ ):  $\delta$  170.0, 141.9, 113.7, 99.7, 83.1, 39.0, 38.5, 29.6, 29.0, 21.3, 16.2, 15.5, 12.1.

HRMS (ESI)  $m/z$   $[\text{M}+\text{Na}]^+$  calc. for  $\text{C}_{13}\text{H}_{22}\text{O}_3\text{Na}$ : 249.1461; found 249.1464.

## Methyl

### 2-((2*R*,3*R*,5*R*,6*S*)-6-((*R*)-but-3-en-2-yl)-3,5-dimethyltetrahydro-2*H*-pyran-2-yl)acetate (14):

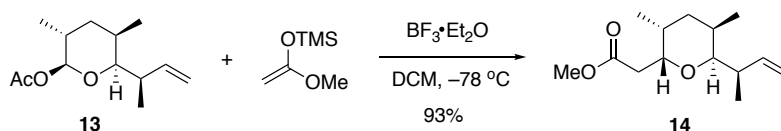

To a solution of acetal **13** (326 mg, 1.44 mmol, 1 eq.) in DCM (14 mL) under Ar at  $-78^\circ\text{C}$ , ((1-methoxyvinyl)oxy)trimethylsilane (2.46 mL, 14.4 mmol, 10 eq.) was added. Then  $\text{BF}_3 \cdot \text{OEt}_2$  (274  $\mu\text{L}$ , 2.16 mmol, 1.5 eq.) was added dropwise. The resulting mixture was stirred at  $-78^\circ\text{C}$  for 22 h. Then, sat. aq.  $\text{NaHCO}_3$  was added at  $-78^\circ\text{C}$  and the mixture was allowed to warm to room temperature. The mixture was extracted with DCM, dried over  $\text{Na}_2\text{SO}_4$ , filtered, and concentrated under reduced pressure. The crude product was purified by flash column chromatography to afford the product **14** as a clear solid (323 mg, 93%). The single crystal sample for XRD analysis was obtained via the single-tube method using acetone/MeOH as solvent.

$R_f$ : 0.31 (EtOAc/pentane 1:15).

$[\alpha]_{\text{D}}^{296.6\text{K}} +71.0$  ( $c = 1, \text{CHCl}_3$ ).

IR  $\nu_{\text{max}}$  ( $\text{cm}^{-1}$ ): 3092, 2961, 2913, 1741, 1436, 1378, 1288, 1213, 1070, 966, 906.

$^1\text{H}$  NMR (400 MHz,  $\text{CDCl}_3$ ):  $\delta$  5.72 (ddd,  $J = 17.7, 10.4, 7.8$  Hz, 1H), 5.00 – 4.89 (m, 2H), 4.35 (dt,  $J = 10.8, 5.1$  Hz, 1H), 3.68 (s, 3H), 3.30 (dd,  $J = 9.8, 2.5$  Hz, 1H), 2.79 (dd,  $J = 14.3, 11.4$  Hz, 1H), 2.30 (dd,  $J = 14.3, 4.5$  Hz, 1H), 2.27 – 2.13 (m, 2H), 1.90 – 1.84 (m, 1H), 1.56 – 1.42 (m, 2H), 0.98 (d,  $J = 7.0$  Hz, 3H), 0.90 (d,  $J = 6.8$  Hz, 3H), 0.75 (d,  $J = 6.9$  Hz, 3H).

$^{13}\text{C}$  NMR (101 MHz,  $\text{CDCl}_3$ ):  $\delta$  172.5, 143.3, 113.1, 75.1, 75.0, 51.8, 39.9, 34.9, 31.9, 29.0, 26.8, 17.6, 16.1, 11.8.

HRMS (ESI)  $m/z$   $[\text{M}+\text{Na}]^+$  calc. for  $\text{C}_{14}\text{H}_{24}\text{O}_3\text{Na}$ : 263.1618; found 263.1633.

## Methyl

**2-((2*R*,3*R*,5*R*,6*S*)-3,5-dimethyl-6-((*S*)-1-oxopropan-2-yl)tetrahydro-2*H*-pyran-2-yl)acetate (7):**

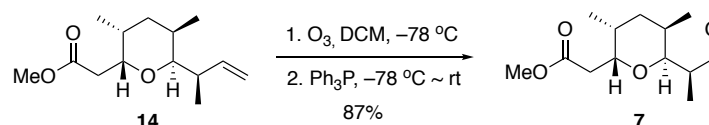

A stream of ozone was bubbled through a solution of alkene **14** (305 mg, 1.27 mmol, 1.0 eq.) in DCM (30 mL) at  $-78\text{ }^\circ\text{C}$  until the blue color persisted. Excess ozone was removed with a stream of oxygen (until solution becomes colorless) and then a stream of nitrogen (30 min) at  $-78\text{ }^\circ\text{C}$ .  $\text{Ph}_3\text{P}$  (1.666 g, 6.35 mmol, 5.0 eq.) was added and the reaction mixture was stirred for 2 h at  $-78\text{ }^\circ\text{C}$ . Then, it was allowed to warm to room temperature and stirred for 18 h. The solvent was removed, and the crude mixture was purified by flash column chromatography to afford the product **7** as a white solid (269 mg, 87%).

$R_f$ : 0.42 (EtOAc/pentane 1:9).

$[\alpha]_D^{296.6\text{ K}}$  +106 ( $c = 1$ ,  $\text{CHCl}_3$ ).

IR  $\nu_{\text{max}}$  ( $\text{cm}^{-1}$ ): 2960, 2917, 2879, 2857, 2726, 1736, 1462, 1438, 1261, 1289, 1176, 1077, 968, 856.

$^1\text{H}$  NMR (400 MHz,  $\text{CDCl}_3$ ):  $\delta$  9.53 (d,  $J = 3.5$  Hz, 1H), 4.31 (dt,  $J = 10.9, 5.0$  Hz, 1H), 3.81 (dd,  $J = 10.3, 2.6$  Hz, 1H), 3.67 (s, 3H), 2.81 (dd,  $J = 14.0, 11.6$  Hz, 1H), 2.39 – 2.23 (m, 3H), 1.88 – 1.84 (m, 1H), 1.61 – 1.46 (m, 2H), 0.99 (d,  $J = 7.0$  Hz, 3H), 0.95 (d,  $J = 7.0$  Hz, 3H), 0.77 (d,  $J = 6.9$  Hz, 3H).

$^{13}\text{C}$  NMR (101 MHz,  $\text{CDCl}_3$ ):  $\delta$  205.3, 172.4, 75.3, 72.0, 52.0, 48.3, 34.4, 31.8, 28.6, 26.8, 17.5, 11.9, 9.8.

HRMS (ESI)  $m/z$   $[\text{M}+\text{Na}]^+$  calc. for  $\text{C}_{13}\text{H}_{22}\text{O}_4\text{Na}$ : 265.1410; found 265.1415.

**2-(Trimethylsilyl)ethyl 2,2-dimethyl-1,3-dioxolane-4-carboxylate (16):**



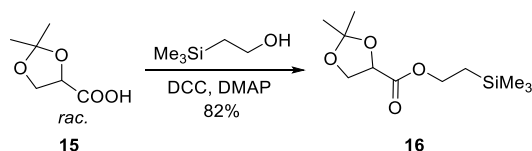

To the solution of racemic acid **15** (2.294 g, 15.7 mmol, 1.0 equiv) in anhydrous DCM (20 mL), 2-trimethylsilylethanol (2.93 mL, 20.4 mmol, 1.3 equiv) was added. The mixture was cooled to 0 °C, then the solution of DCC (4.21 g, 20.4 mmol, 1.3 equiv) in DCM (10 mL) was added, followed by DMAP (96 mg, 0.78 mmol, 0.05 equiv). The white precipitate DCU was generated immediately. After 5 h reaction, the mixture was diluted with pentane and filtered through celite to remove DCU. The filtrate was concentrated and the residue was purified by silica gel column chromatography using pentane/ethyl acetate 50:1 *v/v* as eluent. The product **16** was obtained as colorless oil (3.179 g, 82%).

R<sub>f</sub>: 0.34 (Pentane/EtOAc 20:1).

<sup>1</sup>H NMR (400 MHz, CDCl<sub>3</sub>): δ 4.57 (dd, *J* = 7.2, 5.2 Hz, 1H), 4.32 – 4.22 (m, 3H), 4.10 (dd, *J* = 8.8, 5.2 Hz, 1H), 1.51 (s, 3H), 1.42 (s, 3H), 1.04 (t, *J* = 8.8 Hz, 2H), 0.06 (s, 9H).

<sup>13</sup>C NMR (101 MHz, CDCl<sub>3</sub>): δ 171.4, 111.4, 74.4, 67.4, 63.9, 26.0, 25.7, 17.5, -1.4.

The synthetic compound showed identical spectroscopic data to the reported one.<sup>6</sup>

### 2-(Trimethylsilyl)ethyl 2,3-dihydroxypropanoate (SI-1):

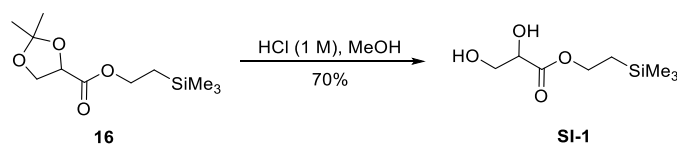

To the solution of acetonide protected ester **16** (6.93 g, 28.1 mmol, 1.0 equiv) in MeOH (24 mL), the solution of 1 M HCl (aq, 35.1 mL, 35.1 mmol, 1.25 equiv) was added. The mixture was stirred at r.t. for 12 h. After full conversion, the reaction was quenched by Et<sub>3</sub>N (6 mL) and concentrated under vacuum. The residue was then purified by silica gel column chromatography using pentane/ethyl acetate 3:1 to 2:1 as eluent. The product **SI-1** was obtained as colorless oil (4.027 g, 70%).

R<sub>f</sub>: 0.60 (Pentane/EtOAc 1:2).

$^1\text{H}$  NMR (400 MHz,  $\text{CDCl}_3$ ):  $\delta$  4.35 – 4.30 (m, 2H), 4.24 (dd,  $J = 8.0, 3.6$  Hz, 1H), 3.93 – 3.81 (m, 2H), 3.19 (d,  $J = 4.4$  Hz, 1H), 2.17 (dd,  $J = 8.0, 5.2$  Hz, 1H), 1.08 – 1.04 (m, 2H), 0.06 (s, 9H).

$^{13}\text{C}$  NMR (101 MHz,  $\text{CDCl}_3$ ):  $\delta$  173.3, 71.7, 64.8, 64.2, 17.5, -1.4.

The synthetic compound showed identical spectroscopic data to the reported one.<sup>6</sup>

### 2-(Trimethylsilyl)ethyl 2-hydroxy-3-(trityloxy)propanoate (**17**):

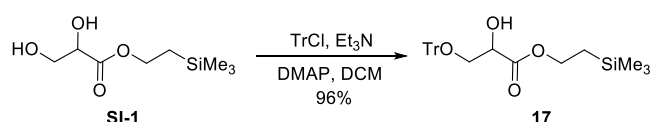

To a stirred solution of **SI-1** (1.50 g, 7.27 mmol, 1.0 equiv) in anhydrous DCM (15 mL) were added  $\text{Et}_3\text{N}$  (1.52 mL, 10.9 mmol, 1.5 equiv) and DMAP (45 mg, 0.36 mmol, 0.05 equiv). The mixture was cooled to 0 °C, then the solution of trityl chloride (3.04 g, 7.27 mmol, 1.0 equiv) in anhydrous DCM (5 mL) was added dropwise. After addition, the mixture was stirred at 0 °C to r.t. for 20 h. When full conversion was achieved, the mixture was concentrated under vacuum, and the residue was purified by silica gel column chromatography using pentane/ethyl acetate 40:1 *v/v* as eluent. The trityl protection product **17** was obtained as colorless oil (3.14 g, 96%).

$R_f$ : 0.30 (Pentane/EtOAc 15:1).

IR  $\nu_{\text{max}}$  ( $\text{cm}^{-1}$ ): 3059, 2952, 2897, 1733, 1597, 1490, 1449, 1249, 1231, 1118, 1095, 1029, 933, 858, 835.

$^1\text{H}$  NMR (400 MHz,  $\text{CDCl}_3$ ):  $\delta$  7.46 – 7.44 (m, 6H), 7.33 – 7.29 (m, 6H), 7.27 – 7.23 (m, 3H), 4.32 – 4.24 (m, 3H), 3.51 (dd,  $J = 9.2, 3.2$  Hz, 1H), 3.38 (dd,  $J = 9.2, 3.2$  Hz, 1H), 3.27 (d,  $J = 7.6$  Hz, 1H), 0.96–1.00 (m, 2H), 0.05 (s, 9H).

$^{13}\text{C}$  NMR (101 MHz,  $\text{CDCl}_3$ ):  $\delta$  173.3, 143.7, 128.7, 127.9, 127.2, 86.4, 70.9, 65.4, 64.2, 17.6, -1.4.

HRMS (ESI)  $m/z$   $[\text{M}+\text{Na}]^+$  calc. for  $\text{C}_{27}\text{H}_{32}\text{NaO}_4\text{Si}$ : 471.1962; found 471.1983.

### 4-(2-(Trimethylsilyl)ethoxy)-5-((trityloxy)methyl)furan-2(5H)-one (**18**):

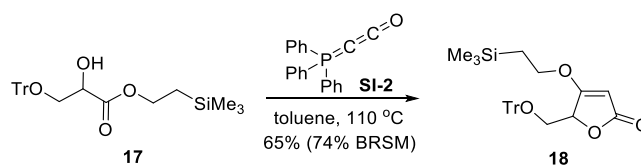

To a stirred solution of **17** (1.46 g, 3.24 mmol, 1.0 equiv) in anhydrous toluene (35 mL) was added Bestmann reagent (**SI-2**) (1.76 g, 5.83 mmol, 1.8 equiv, prepared according to published procedure). The mixture was heated under argon to 110 °C for 24 h. After being cooled to r.t., the mixture was concentrated under vacuum, and the residue was purified by silica gel column chromatography. The recovered starting material **17** was eluted by pentane/ethyl acetate 40:1 *v/v* (192 mg, 13%), then the product **18** was eluted by pentane/ethyl acetate 6:1 and obtained as white solid (989 mg, 64%, 74% BRSM).

R<sub>f</sub>: 0.44 (Pentane/EtOAc 6:1).

IR  $\nu_{\max}$  (cm<sup>-1</sup>): 3058, 2951, 1760, 1628, 1490, 1448, 1350, 1292, 1248, 1232, 1151, 1115, 1077, 1033, 930, 836.

<sup>1</sup>H NMR (400 MHz, CDCl<sub>3</sub>):  $\delta$  7.45 – 7.43 (m, 6H), 7.33 – 7.29 (m, 6H), 7.28 – 7.23 (m, 3H), 5.14 (s, 1H), 4.84 – 4.82 (m, 1H), 4.16 – 4.05 (m, 2H), 3.59 (dd, *J* = 10.4, 2.8 Hz, 1H), 3.28 (dd, *J* = 10.4, 4.4 Hz, 1H), 1.10 – 1.06 (m, 2H), 0.03 (s, 9H).

<sup>13</sup>C NMR (101 MHz, CDCl<sub>3</sub>):  $\delta$  179.0, 173.2, 143.5, 128.7, 128.0, 127.2, 89.6, 86.6, 78.7, 71.2, 62.0, 17.3, -1.3.

HRMS (ESI) *m/z* [M+Na]<sup>+</sup> calc. for C<sub>29</sub>H<sub>32</sub>NaO<sub>4</sub>Si: 495.1962; found 495.1971.

### 5-(Hydroxymethyl)-4-(2-(trimethylsilyl)ethoxy)furan-2(5H)-one (**SI-3**):

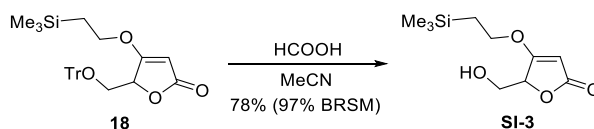

The solid **18** (941 mg, 1.99 mmol, 1.0 equiv) was dissolved in MeCN (18 mL) and then formic acid (6.0 mL, excess amount) was added. The mixture was stirred at r.t. for 5 h, then was diluted by ethyl acetate (300 mL). The organic phase was thoroughly washed with sat. NaHCO<sub>3</sub> (aq) and brine, dried over anhydrous Na<sub>2</sub>SO<sub>4</sub>, and concentrated under vacuum. The residue was purified by silica gel column chromatography. The recovered starting material was eluted by pentane/ethyl acetate *v/v* 6:1 (184 mg, 20%), then the deprotection product **SI-3**

was eluted by pentane/ethyl acetate 1:1 v/v and obtained as white solid (356 mg, 78%, 97% BRSM).

R<sub>f</sub>: 0.16 (Pentane/EtOAc 2:1).

IR ν<sub>max</sub> (cm<sup>-1</sup>): 3428 (br), 3122, 2954, 2892, 1738, 1678, 1620, 1463, 1449, 1403, 1379, 1354, 1313, 1246, 1196, 1161, 1100, 1058, 1031, 946, 923, 836.

<sup>1</sup>H NMR (400 MHz, CDCl<sub>3</sub>): δ 5.08 (s, 1H), 4.80 – 4.79 (m, 1H), 4.14 (dd, *J* = 9.6, 7.6 Hz, 2H), 4.04 (ddd, *J* = 12.4, 6.0, 2.8 Hz, 1H), 3.80 (ddd, *J* = 12.4, 8.0, 4.0 Hz, 1H), 2.59 (dd, *J* = 8.0, 6.0 Hz, 1H), 1.19 – 1.13 (m, 2H), 0.07 (s, 9H).

<sup>13</sup>C NMR (101 MHz, CDCl<sub>3</sub>): δ 178.8, 173.3, 89.8, 79.9, 71.5, 61.2, 17.4, -1.4.

HRMS (ESI) *m/z* [M+Na]<sup>+</sup> calc. for C<sub>10</sub>H<sub>18</sub>NaO<sub>4</sub>Si: 253.0867; found 253.0874.

### 5-Methylene-4-(2-(trimethylsilyl)ethoxy)furan-2(5*H*)-one (**19**):

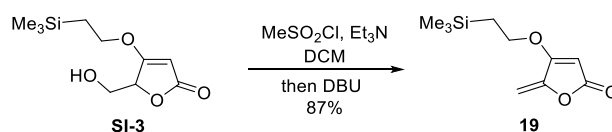

To a stirred solution of **SI-3** (357 mg, 1.55 mmol, 1.0 equiv) in anhydrous DCM (18 mL) was added Et<sub>3</sub>N (0.54 mL, 3.88 mmol, 2.5 equiv). The mixture was cooled to 0 °C, then MeSO<sub>2</sub>Cl (0.18 mL, 2.33 mmol, 1.5 equiv) was added dropwise. The mixture was stirred at 0 °C to r.t. for 2 h, and full mesylation of **SI-3** was achieved. However, the elimination of the mesylate was incomplete (> 20% mesylate left). To facilitate complete elimination, DBU (0.046 mL, 0.31 mmol, 0.2 equiv) was added. The mixture was further stirred at r.t. for 2 h, then was diluted with ethyl acetate. The organic phase was washed with water and brine, dried over anhydrous Na<sub>2</sub>SO<sub>4</sub>, and concentrated under vacuum. The residue was purified by silica gel column chromatography using pentane/ethyl acetate 20:1 v/v as eluent. The product **19** was obtained as white solid (287 mg, 87%).

R<sub>f</sub>: 0.36 (Pentane/EtOAc 15:1).

IR ν<sub>max</sub> (cm<sup>-1</sup>): 3128, 2953, 2897, 1783, 1669, 1603, 1466, 1415, 1372, 1348, 1260, 1229, 1176, 1097, 1065, 1038, 969, 935, 857, 838, 797.

$^1\text{H}$  NMR (400 MHz,  $\text{CDCl}_3$ ):  $\delta$  5.19 (d,  $J = 1.2$  Hz, 1H), 5.04 – 5.02 (m, 2H), 4.17 (t,  $J = 8.4$  Hz, 2H), 1.18 (t,  $J = 8.4$  Hz, 2H), 0.09 (s, 9H).

$^{13}\text{C}$  NMR (101 MHz,  $\text{CDCl}_3$ ):  $\delta$  168.8, 168.7, 150.2, 92.3, 89.8, 71.1, 17.3, -1.3.

HRMS (ESI)  $m/z$   $[\text{M}+\text{Na}]^+$  calc. for  $\text{C}_{10}\text{H}_{16}\text{NaO}_3\text{Si}$ : 235.0761; found 235.0763.

**(Z)-5-(Chloromethylene)-4-(2-(trimethylsilyl)ethoxy)furan-2(5H)-one (**8a**):**

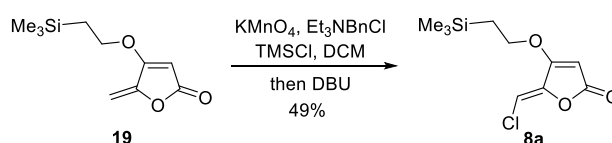

To a flame dried Schlenk flask were added  $\text{KMnO}_4$  (174 mg, 1.10 mmol, 1.0 equiv), triethylbenzylammonium chloride (251 mg, 1.10 mmol, 1.0 equiv) and anhydrous DCM (20 mL). The mixture was stirred at r.t. for 40 min to generate a homogeneous solution. Then the mixture was cooled to 0 °C and  $\text{TMSCl}$  (0.56 mL, 4.40 mmol, 4.0 equiv) was added. The mixture was stirred at 0 °C for 20 min to generate a dark green colored solution. To this mixture, the solution of **19** (234 mg, 1.10 mmol, 1.0 equiv) in anhydrous DCM (5 mL) was added at 0 °C dropwise. After addition, the mixture was stirred at 0 °C to r.t. overnight to achieve full conversion. To this mixture,  $\text{DBU}$  (0.82 mL, 5.50 mmol, 5.0 equiv) was added to facilitate elimination of the dichloride intermediate. After full conversion of the intermediate (ca. 5 h), the mixture was quenched with sat.  $\text{NaHCO}_3$  (aq) and filtered through celite to remove precipitate. The filtrate was washed with water and brine, dried over anhydrous  $\text{Na}_2\text{SO}_4$ , and concentrated under vacuum. The residue was purified by silica gel column chromatography using pentane/ethyl acetate 20:1  $v/v$  as eluent. The product **8a** was obtained as white solid (132 mg, 49%).

$R_f$ : 0.38 (Pentane/ $\text{EtOAc}$  15:1).

IR  $\nu_{\text{max}}$  ( $\text{cm}^{-1}$ ): 3098, 2954, 2901, 1769, 1588, 1461, 1432, 1401, 1356, 1295, 1248, 1236, 1172, 1067, 942, 922, 882, 836.

$^1\text{H}$  NMR (400 MHz,  $\text{CDCl}_3$ ):  $\delta$  6.06 (s, 1H), 5.20 (s, 1H), 4.18 (t,  $J = 8.4$  Hz, 2H), 1.17 (t,  $J = 8.4$  Hz, 2H), 0.09 (s, 9H).

$^{13}\text{C}$  NMR (101 MHz,  $\text{CDCl}_3$ ):  $\delta$  168.0, 167.3, 145.4, 100.0, 89.3, 71.6, 17.4, -1.3.

HRMS (ESI)  $m/z$   $[\text{M}+\text{Na}]^+$  calc. for  $\text{C}_{10}\text{H}_{15}\text{ClNaO}_3\text{Si}$ : 269.0371; found 269.0371.

**(Z)-5-(Bromomethylene)-4-(2-(trimethylsilyl)ethoxy)furan-2(5H)-one (8b):**

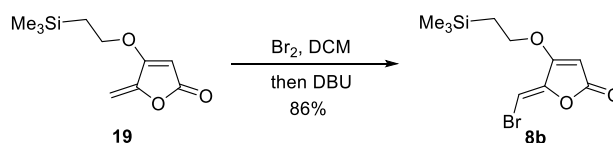

To a flame dried Schlenk flask were added **19** (110 mg, 0.516 mmol, 1.0 equiv) and anhydrous DCM (8 mL). To this solution, Br<sub>2</sub> (0.026 mL, 0.516 mmol, 1.0 equiv) was added dropwise. The mixture was stirred at r.t. overnight, and full conversion of **19** was achieved accompanied by the disappearance of the color of Br<sub>2</sub>. To this mixture, DBU (0.085, 0.568 mmol, 1.1 equiv) was added to facilitate elimination of the dibromide intermediate. After 2 h, the mixture was diluted with ethyl acetate, and successively washed with Na<sub>2</sub>S<sub>2</sub>O<sub>3</sub> (aq), water and brine. The organic phase was dried over anhydrous Na<sub>2</sub>SO<sub>4</sub> and concentrated under vacuum. The residue was purified by silica gel column chromatography using pentane/ethyl acetate 20:1 v/v as eluent. The product **8b** was obtained as white solid (129 mg, 86%).

R<sub>f</sub>: 0.32 (Pentane/EtOAc 15:1).

IR ν<sub>max</sub> (cm<sup>-1</sup>): 3097, 2954, 2901, 1764, 1725, 1589, 1460, 1432, 1398, 1353, 1248, 1233, 1161, 1068, 941, 916, 860, 836.

<sup>1</sup>H NMR (400 MHz, CDCl<sub>3</sub>): δ 6.16 (s, 1H), 5.23 (s, 1H), 4.18 (t, *J* = 8.4 Hz, 2H), 1.17 (t, *J* = 8.4 Hz, 2H), 0.09 (s, 9H).

<sup>13</sup>C NMR (101 MHz, CDCl<sub>3</sub>): δ 167.7, 167.3, 147.4, 89.6, 87.8, 71.6, 17.4, -1.3.

HRMS (ESI) *m/z* [M+Na]<sup>+</sup> calc. for C<sub>10</sub>H<sub>15</sub>BrNaO<sub>3</sub>Si: 312.9866; found 312.9870.

**Tri-ethyl(((*R,Z*)-4-((*2S,3S,5S*)-5-ethyl-5-((*2R,5R,6S*)-5-ethyl-6-methyl-5-((triethylsilyl)oxy)tetrahydro-2*H*-pyran-2-yl)-3-methyltetrahydrofuran-2-yl)hex-2-en-3-yl)oxy)silane (20a):**

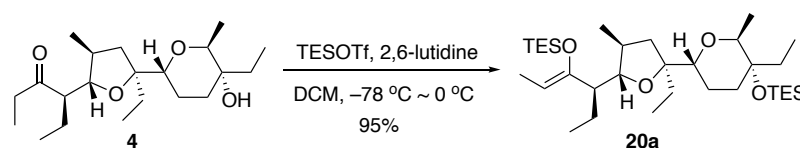

To a solution of alcohol **4** (3.02 g, 8.52 mmol, 1 eq.) in 35 ml dry DCM cooled to -78 °C, 2,6-lutidine (9.9 mL, 85.2 mmol, 10 eq.) was added under Ar. Then TESOTf (4.8 mL, 21.3

mmol, 2.5 eq.) was added dropwise. The obtained mixture was warmed to 0 °C and stirred overnight. The mixture was diluted with ether and then was washed with water, brine and dried with Na<sub>2</sub>SO<sub>4</sub>. The solvent was removed, and the crude mixture was purified by flash column chromatography to afford the product **20a** as colorless oil (4.73 g, 95%). The *Z* and *E* configurations are determined by NOE.

R<sub>f</sub>: 0.90 (EtOAc/pentane 1:9).

[α]<sub>D</sub><sup>29.2 K</sup> +7.8 (c = 1, CHCl<sub>3</sub>).

IR ν<sub>max</sub> (cm<sup>-1</sup>): 2954, 2912, 2876, 1669, 1458, 1240, 1096, 1064, 1046, 1007, 723.

<sup>1</sup>H NMR (400 MHz, CDCl<sub>3</sub>): δ 4.53 (q, *J* = 6.6 Hz, 1H), 3.79 (q, *J* = 6.9 Hz, 1H), 3.41 (d, *J* = 9.3 Hz, 1H), 3.35 (t, *J* = 7.8 Hz, 1H), 1.93 – 1.84 (m, 2H), 1.81 – 1.73 (m, 2H), 1.70 – 1.63 (m, 2H), 1.60 – 1.28 (m, 10H), 1.15 (d, *J* = 6.8 Hz, 3H), 1.01 – 0.84 (m, 31H), 0.71 – 0.59 (m, 12H).

<sup>13</sup>C NMR (101 MHz, CDCl<sub>3</sub>): δ 151.1, 101.9, 87.7, 84.4, 76.7, 75.2, 74.9, 53.5, 41.9, 38.6, 31.0, 30.9, 28.4, 22.8, 21.8, 17.6, 15.5, 12.5, 11.0, 8.3, 7.5, 7.13, 7.08, 7.0, 6.1.

HRMS (ESI) *m/z* [M+H]<sup>+</sup> calc. for C<sub>33</sub>H<sub>67</sub>O<sub>4</sub>Si<sub>2</sub>: 583.4572; found 583.4587.

### Tri-

**ethyl(((*R,E*)-4-((*2S,3S,5S*)-5-ethyl-5-((*2R,5R,6S*)-5-ethyl-6-methyl-5-((triethylsilyloxy)tetrahydro-2*H*-pyran-2-yl)-3-methyltetrahydrofuran-2-yl)hex-2-en-3-yl)oxy)silane (**20b**):**

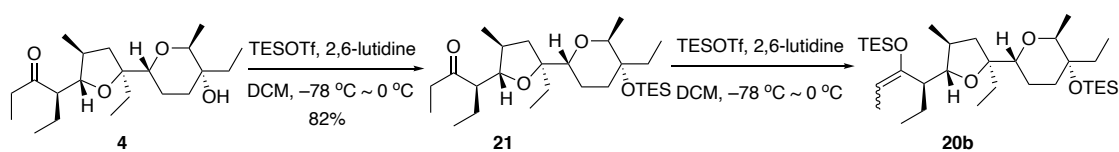

To a solution of alcohol **4** (520 mg, 1.468 mmol, 1 eq.) in 15 ml DCM (0.1 M) cooled to -78 °C under Ar, 2,6-lutidine (850 uL, 7.34 mmol, 5 eq.) was added. Then TESOTf (400 uL, 1.76 mmol, 1.2 eq.) was added slowly. The resulting mixture was slowly warmed to -10 °C and stirred overnight. The mixture was diluted with ether and then was washed with 2 N HCl, sat. aq. NaHCO<sub>3</sub>, brine and dried with Na<sub>2</sub>SO<sub>4</sub>. The solvent was removed, and the crude mixture was purified by flash column chromatography to afford the product **21** as colorless oil (562 mg, 82%).

To a solution of mono-*TES* protected ketone **21** (1.0 eq.) in DCM (0.1 M) was added *TESOTf* (10 eq.) slowly at -78 °C under Ar. The mixture was stirred at -78 °C for another 2 h before pyridine (10 eq.) was added dropwise. The resulting mixture was warmed to 0 °C and stirred until the ketone disappeared. The mixture was diluted with ether and then was washed with cold sat. aq. NaHCO<sub>3</sub>, brine and dried with Na<sub>2</sub>SO<sub>4</sub>. The solvent was removed, and the crude mixture was purified by flash column chromatography to afford the product (**20a/20b** ratio 1:2.3) as colorless oil (Note: the *Z/E* isomers are very difficult to be separated by flash column chromatography. To get acceptable amount of enolate, a mixture of **20a/20b** (ratio range from 1:1.7 to 1:3.0) was collected). The total yield is more than 90%.

Only the <sup>1</sup>H NMR characteristic peaks were reported here, **20a/20b** (*Z/E*) ratio 1:2.3:

<sup>1</sup>H NMR (400 MHz, CDCl<sub>3</sub>): δ 4.61 (q, *J* = 6.7 Hz, 2.3H) (*E* enolate), 4.53 (q, *J* = 6.7 Hz, 1.0H) (*Z* enolate), 2.33 (ddd, *J* = 11.1, 8.5, 3.1 Hz, 2.4H) (*E* enolate).

#### General protocol for the Mukaiyama-aldol reaction:

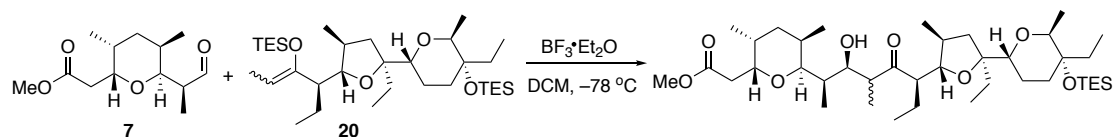

To a solution of aldehyde **7** (1.0 eq) and enolate **20** (2.0-3.0 eq.) in DCM (0.05 M) at -78 °C, BF<sub>3</sub>·OEt<sub>2</sub> (1.5 eq.) was added slowly. The obtained mixture was stirred at -78 °C until the enolate disappeared. The reaction was quenched with sat. aq. NaHCO<sub>3</sub> at -78 °C and the mixture was extracted with DCM and dried with Na<sub>2</sub>SO<sub>4</sub>. The solvent was removed and the crude mixture was purified by flash column chromatography to afford the aldol products (P1, P2, P3, and P4). P2 (**22**) and P3 (**23**) were unambiguously assigned by x-ray crystallography of derivatives. P1 and P4 were tentatively assigned as aldol diastereomers based on <sup>1</sup>H and <sup>13</sup>C NMR (NMR spectra are attached), but full stereochemical assignment of those compounds have not been done.

Using pure *Z*-enolate **20a** (3.0 eq.), 60 h: P2 (442.5 mg, 56%), P3 (232.7 mg, 30%)

Using a mixture of *Z/E*-enolate **20a/20b** (*Z/E*=1/2.3, 2.0 eq.), 36 h: P2 (41.2 mg, 7%), P3 (457.2 mg, 81%)



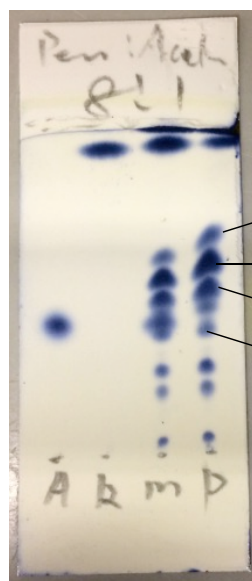

Using pure Z-enolate

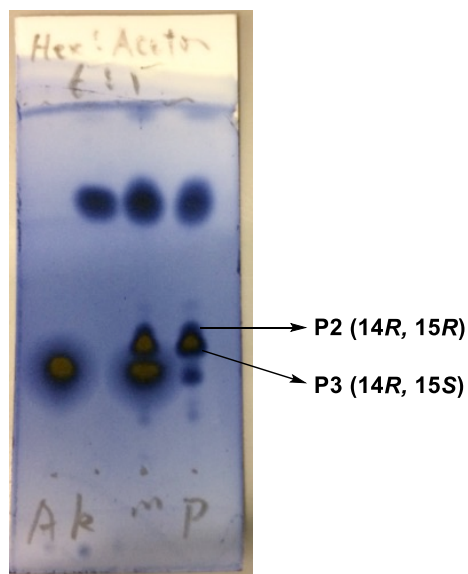

Using a mixture of Z/E-enolate (Z/E=1/2.3)

## Methyl

2-((2*R*,3*R*,5*R*,6*S*)-6-((2*R*,3*R*,4*R*,6*R*)-6-((2*S*,3*S*,5*S*)-5-ethyl-5-((2*R*,5*R*,6*S*)-5-ethyl-6-methyl-5-((triethylsilyloxy)tetrahydro-2*H*-pyran-2-yl)-3-methyltetrahydrofuran-2-yl)-3-hydroxy-4-methyl-5-oxooctan-2-yl)-3,5-dimethyltetrahydro-2*H*-pyran-2-yl)acetate (**22**):

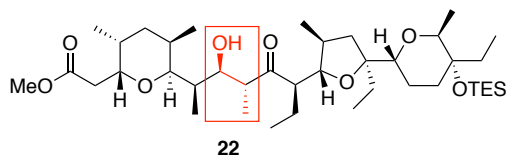

**22**: P2 (14*R*, 15*R*)

R<sub>f</sub>: 0.58 (Pentane/Acetone= 8/1).

$[\alpha]_D^{296.8\text{K}}$  -12.8 (c = 1, CHCl<sub>3</sub>).

IR  $\nu_{\text{max}}$  (cm<sup>-1</sup>): 3533 (br), 2957, 2876, 1723, 1458, 1377, 1291, 1132, 1072, 1047, 1010, 985, 957.

<sup>1</sup>H NMR (400 MHz, CDCl<sub>3</sub>):  $\delta$  4.29 (dt, *J* = 12.2, 4.7 Hz, 1H), 3.95 (ddd, *J* = 10.3, 5.9, 1.5 Hz, 1H), 3.83 (dd, *J* = 9.9, 3.4 Hz, 1H), 3.77 – 3.71 (m, 4H), 3.52 (dd, *J* = 10.0, 2.2 Hz, 1H), 3.45 (dd, *J* = 11.3, 2.5 Hz, 1H), 3.19 (d, *J* = 5.9 Hz, 1H), 2.94 – 2.90 (m, 1H), 2.81 (t, *J* = 12.7 Hz, 1H), 2.70 (dt, *J* = 9.8, 3.3 Hz, 1H), 2.30 (dd, *J* = 13.2, 4.0 Hz, 1H), 2.24 (dt, *J* = 12.1, 6.0 Hz, 1H), 2.02 – 1.71 (m, 5H), 1.63 – 1.35 (m, 9H), 1.32 – 1.25 (m, 3H), 1.12 (d, *J* = 6.8 Hz, 3H), 0.99 – 0.82 (m, 27H), 0.76 (d, *J* = 6.9 Hz, 6H), 0.66 – 0.52 (m, 6H).

$^{13}\text{C}$  NMR (101 MHz,  $\text{CDCl}_3$ ):  $\delta$  215.8, 174.7, 84.6, 83.8, 76.7, 75.4, 75.0, 74.0, 72.0, 70.4, 57.8, 52.7, 47.2, 40.1, 37.0, 36.3, 35.0, 32.3, 31.8, 30.3, 29.1, 28.9, 27.0, 22.2, 17.8, 17.6, 16.1, 15.5, 13.6, 12.5, 11.7, 8.0, 7.5, 7.2, 7.1, 7.0, 6.7, 6.4, 5.9.

HRMS (ESI)  $m/z$   $[\text{M}+\text{Na}]^+$  calc. for  $\text{C}_{40}\text{H}_{74}\text{NaO}_8\text{Si}$ : 733.5045; found 733.5088.

## Methyl

**2-((2R,3R,5R,6S)-6-((2R,3R,4S,6R)-6-((2S,3S,5S)-5-ethyl-5-((2R,5R,6S)-5-ethyl-6-methyl-5-((triethylsilyl)oxy)tetrahydro-2H-pyran-2-yl)-3-methyltetrahydrofuran-2-yl)-3-hydroxy-4-methyl-5-oxooctan-2-yl)-3,5-dimethyltetrahydro-2H-pyran-2-yl)acetate (23):**

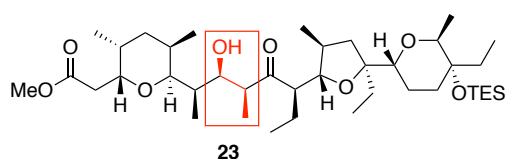

**23:** P3 (14*R*, 15*S*)

$R_f$ : 0.50 (Pentane/Acetone= 8/1).

$[\alpha]_D^{296.8\text{K}}$   $-1.0$  ( $c = 1$ ,  $\text{CHCl}_3$ ).

IR  $\nu_{\text{max}}$  ( $\text{cm}^{-1}$ ): 3542 (br), 2959, 2935, 2876, 1726, 1458, 1378, 1290, 1132, 1062, 984.  $^1\text{H}$  NMR (400 MHz,  $\text{CDCl}_3$ ):  $\delta$  4.24 (ddd,  $J = 9.2, 6.0, 3.1$  Hz, 1H), 4.02 – 3.96 (m, 1H), 3.75 – 3.65 (m, 5H), 3.51 – 3.47 (m, 1H), 3.45 – 3.39 (m, 2H), 2.94 – 2.89 (m, 1H), 2.81 (td,  $J = 12.7, 2.5$  Hz, 1H), 2.58 (dq,  $J = 9.5, 3.4$  Hz, 1H), 2.27 – 2.14 (m, 2H), 1.91 – 1.77 (m, 4H), 1.71 – 1.68 (m, 1H), 1.65 – 1.55 (m, 2H), 1.52 – 1.36 (m, 4H), 1.34 – 1.25 (m, 3H), 1.22–1.18 (m, 3H), 1.12 (dd,  $J = 6.9, 2.5$  Hz, 3H), 0.96 – 0.71 (m, 33H), 0.63 – 0.50 (m, 6H).

$^{13}\text{C}$  NMR (101 MHz,  $\text{CDCl}_3$ ):  $\delta$  215.1, 174.5, 84.9, 83.9, 76.7, 75.2, 75.0, 73.9, 71.3, 69.4, 55.7, 52.2, 48.2, 40.9, 37.9, 37.6, 35.0, 31.61, 31.59, 30.4, 28.9, 28.5, 27.0, 21.8, 18.9, 17.7, 16.8, 15.5, 15.4, 12.3, 11.8, 8.6, 8.1, 7.4, 7.0, 6.9.

HRMS (ESI)  $m/z$   $[\text{M}+\text{Na}]^+$  calc. for  $\text{C}_{40}\text{H}_{74}\text{NaO}_8\text{Si}$ : 733.5045; found 733.5089.

## General protocol for the TES deprotection:

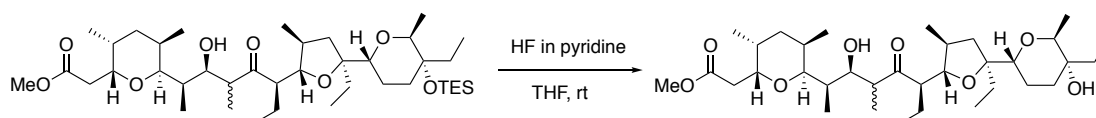

To a solution of the ester (1.0 eq.) in dry THF (0.1 M) in a plastic vial under Ar at room temperature, hydrogen fluoride in pyridine (1.0 mL per 1.0 mmol) was added dropwise. The resulting mixture was stirred until SM disappeared (~24 h). The mixture was diluted with water and extracted with ether. The combined organic layers were washed with 1N HCl and dried with Na<sub>2</sub>SO<sub>4</sub>. The solvent was removed, and the crude mixture was purified by flash column chromatography to afford the product.

### Methyl

**2-((2*R*,3*R*,5*R*,6*S*)-6-((2*R*,3*R*,4*R*,6*R*)-6-((2*S*,3*S*,5*S*)-5-ethyl-5-((2*R*,5*R*,6*S*)-5-ethyl-5-hydroxy-6-methyltetrahydro-2*H*-pyran-2-yl)-3-methyltetrahydrofuran-2-yl)-3-hydroxy-4-methyl-5-oxooctan-2-yl)-3,5-dimethyltetrahydro-2*H*-pyran-2-yl)acetate (**24**):**

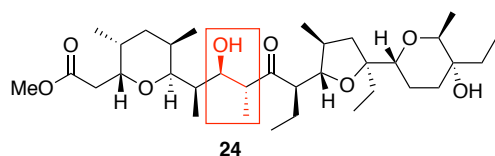

**24**: 81%. The single crystal sample for XRD analysis was obtained via the single-tube method using EtOAc/Pentane as solvent.

R<sub>f</sub>: 0.13 (Pentane/EtOAc 4:1).

$[\alpha]_D^{296.7\text{ K}} -4.2$  (c = 1, CHCl<sub>3</sub>).

IR  $\nu_{\text{max}}$  (cm<sup>-1</sup>): 3530 (br), 2961, 2936, 2877, 1720, 1458, 1378, 1291, 1215, 1179, 1131, 1072, 1050, 984, 956.

<sup>1</sup>H NMR (400 MHz, CDCl<sub>3</sub>):  $\delta$  4.29 (dt, *J* = 11.9, 4.8 Hz, 1H), 3.95 (ddd, *J* = 10.3, 6.5, 1.5 Hz, 1H), 3.83 – 3.72 (m, 5H), 3.54 – 3.48 (m, 2H), 3.26 (d, *J* = 6.0 Hz, 1H), 2.93 (dq, *J* = 10.2, 6.8 Hz, 1H), 2.81 (t, *J* = 12.7 Hz, 1H), 2.70 – 2.66 (m, 2H), 2.31 (dd, *J* = 13.2, 4.1 Hz, 1H), 2.24 (dt, *J* = 11.8, 6.0 Hz, 1H), 2.06 – 1.78 (m, 4H), 1.66 – 1.25 (m, 13H), 1.17 (d, *J* = 6.9 Hz, 3H), 0.99 (d, *J* = 6.4 Hz, 3H), 0.95 (d, *J* = 7.0 Hz, 3H), 0.92 – 0.88 (m, 9H), 0.84 (t, *J* = 7.4 Hz, 3H), 0.77 – 0.75 (m, 6H).

<sup>13</sup>C NMR (101 MHz, CDCl<sub>3</sub>):  $\delta$  215.6, 174.7, 84.5, 84.0, 76.9, 75.4, 73.0, 72.0, 71.0, 70.4, 57.7, 52.7, 47.1, 40.1, 36.8, 36.3, 35.0, 32.3, 30.5, 29.5, 29.2, 28.9, 27.0, 21.8, 17.7, 17.6, 16.3, 14.2, 13.8, 12.4, 11.7, 8.1, 7.3, 6.6.

HRMS (ESI)  $m/z$   $[M+Na]^+$  calc. for  $C_{34}H_{60}NaO_8$ : 619.4180; found 619.4181.

## Methyl

2-((2*R*,3*R*,5*R*,6*S*)-6-((2*R*,3*R*,4*S*,6*R*)-6-((2*S*,3*S*,5*S*)-5-ethyl-5-((2*R*,5*R*,6*S*)-5-ethyl-5-hydroxy-6-methyltetrahydro-2*H*-pyran-2-yl)-3-methyltetrahydrofuran-2-yl)-3-hydroxy-4-methyl-5-oxooctan-2-yl)-3,5-dimethyltetrahydro-2*H*-pyran-2-yl)acetate (**25**):

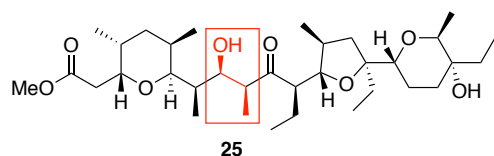

**25**: 93%

R<sub>f</sub>: 0.13 (Pentane/EtOAc 4:1).

$[\alpha]_D^{296.4 K} +4.0$  ( $c = 1$ ,  $CHCl_3$ ).

IR  $\nu_{max}$  ( $cm^{-1}$ ): 3539 (br), 2961, 2935, 2876, 1725, 1457, 1379, 1290, 1214, 1177, 1132, 1050, 985, 956.

$^1H$  NMR (400 MHz,  $CDCl_3$ ):  $\delta$  4.25 (dt,  $J = 12.4, 4.2$  Hz, 1H), 3.99 (dd,  $J = 9.0, 4.9$  Hz, 1H), 3.77 – 3.65 (m, 5H), 3.52 – 3.45 (m, 3H), 2.95 – 2.88 (m, 1H), 2.82 (t,  $J = 12.6$  Hz, 1H), 2.62 – 2.56 (m, 2H), 2.27 (dd,  $J = 13.1, 3.7$  Hz, 1H), 2.24 – 2.16 (m, 1H), 1.93 – 1.84 (m, 3H), 1.82 – 1.76 (m, 1H), 1.62 – 1.40 (m, 11H), 1.38 – 1.26 (m, 2H), 1.21 – 1.18 (m, 6H), 0.95 (d,  $J = 5.7$  Hz, 3H), 0.92 – 0.79 (m, 12H), 0.77 (d,  $J = 6.9$  Hz, 3H), 0.74 (d,  $J = 6.9$  Hz, 3H).

$^{13}C$  NMR (101 MHz,  $CDCl_3$ ):  $\delta$  214.9, 174.5, 84.6, 84.0, 77.1, 75.3, 73.1, 71.3, 71.1, 69.6, 55.7, 52.3, 48.2, 41.1, 37.9, 37.6, 35.0, 31.6, 30.5, 29.4, 28.9, 28.3, 27.0, 21.4, 18.9, 17.7, 17.0, 15.5, 14.2, 12.2, 11.8, 8.7, 8.2, 6.6.

HRMS (ESI)  $m/z$   $[M+Na]^+$  calc. for  $C_{34}H_{60}NaO_8$ : 619.4180; found 619.4198.

## General protocol for the methyl ester hydrolysis:

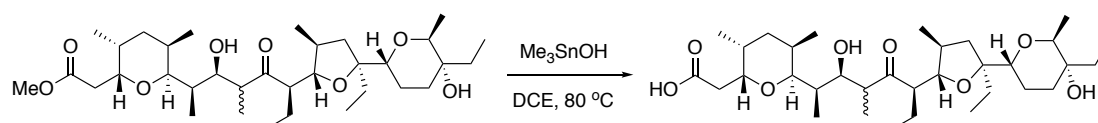

To a solution of the ester (1 eq.) and Me<sub>3</sub>SnOH (5 eq.) in DCE (0.025 M) was heated to 80 °C until TLC analysis indicated a complete reaction (48 h). Then solvent was removed and the residue was taken up in EtOAc. The organic layer was then washed with aq. HCl (5%), brine and dried over Na<sub>2</sub>SO<sub>4</sub>. The solvent was removed, and the crude mixture was purified by flash column chromatography to afford the product.

**2-((2*R*,3*R*,5*R*,6*S*)-6-((2*R*,3*R*,4*R*,6*R*)-6-((2*S*,3*S*,5*S*)-5-Ethyl-5-((2*R*,5*R*,6*S*)-5-ethyl-5-hydroxy-6-methyltetrahydro-2*H*-pyran-2-yl)-3-methyltetrahydrofuran-2-yl)-3-hydroxy-4-methyl-5-oxooctan-2-yl)-3,5-dimethyltetrahydro-2*H*-pyran-2-yl)acetic acid (SL415, **26**):**

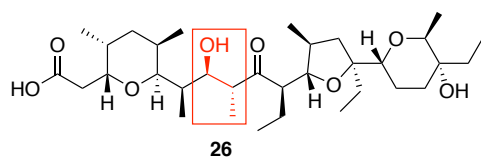

SL415 (**26**): quantitative yield.

R<sub>f</sub>: 0.40 (DCM/MeOH/AcOH 20:1:0.01).

[α]<sub>D</sub><sup>296.2 K</sup> -10.8 (c = 1, MeOH).

IR ν<sub>max</sub> (cm<sup>-1</sup>): 3484 (br), 2961, 2935, 2879, 1711, 1598 (br), 1458, 1379, 1288, 1130, 1108, 1071, 1053, 988, 956.

<sup>1</sup>H NMR (400 MHz, CD<sub>3</sub>OD): δ 4.27 (dt, *J* = 10.5, 4.3 Hz, 1H), 4.03 (dd, *J* = 10.4, 1.7 Hz, 1H), 3.88 (dd, *J* = 10.0, 2.7 Hz, 1H), 3.77 (q, *J* = 6.9 Hz, 1H), 3.62 – 3.54 (m, 2H), 3.02 (dq, *J* = 10.4, 7.1 Hz, 1H), 2.79 – 2.73 (m, 2H), 2.34 (dd, *J* = 13.1, 3.8 Hz, 1H), 2.27 – 2.21 (m, 1H), 2.07 – 2.00 (m, 1H), 1.93 – 1.83 (m, 3H), 1.78 (dd, *J* = 12.3, 8.0 Hz, 1H), 1.65 – 1.28 (m, 12H), 1.19 (d, *J* = 6.9 Hz, 3H), 1.03 (d, *J* = 6.3 Hz, 3H), 0.98 (d, *J* = 7.0 Hz, 3H), 0.92 – 0.85 (m, 12H), 0.80 – 0.77 (m, 6H).

<sup>13</sup>C NMR (101 MHz, CD<sub>3</sub>OD): δ 218.5, 177.7, 86.5, 85.6, 77.2, 74.0, 73.6, 72.2, 71.5, 58.9, 48.0, 40.3, 37.6, 37.4, 35.9, 32.6, 32.4, 30.7, 30.6, 30.2, 28.5, 22.7, 18.2, 17.8, 16.0, 14.9, 14.1, 13.2, 12.0, 8.4, 7.6, 6.7.

HRMS (ESI) *m/z* [M-H]<sup>-</sup> calc. for C<sub>33</sub>H<sub>57</sub>O<sub>8</sub>: 581.4059; found 581.4064.

**2-((2R,3R,5R,6S)-6-((2R,3R,4S,6R)-6-((2S,3S,5S)-5-Ethyl-5-((2R,5R,6S)-5-ethyl-5-hydroxy-6-methyltetrahydro-2H-pyran-2-yl)-3-methyltetrahydrofuran-2-yl)-3-hydroxy-4-methyl-5-oxooctan-2-yl)-3,5-dimethyltetrahydro-2H-pyran-2-yl)acetic acid (SL382, 27):**

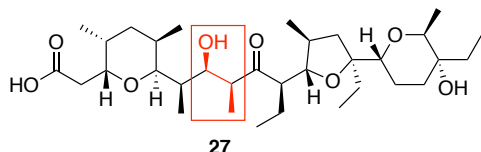

SL382 (27): 89%

R<sub>f</sub>: 0.24 (DCM/MeOH/AcOH 20:1:0.01).

$[\alpha]_D^{296.2\text{K}} +6.0$  (c = 1, MeOH).

IR  $\nu_{\text{max}}$  (cm<sup>-1</sup>): 3474 (br), 2963, 2937, 2879, 1710, 1618 (br), 1458, 1379, 1284, 1215, 1176, 1132, 1095, 1077, 1050, 986, 954.

<sup>1</sup>H NMR (400 MHz, CD<sub>3</sub>OD):  $\delta$  4.31 – 4.26 (m, 1H), 4.10 (d, *J* = 9.4 Hz, 1H), 3.80 – 3.71 (m, 2H), 3.60 – 3.46 (m, 3H), 2.99 – 2.91 (m, 1H), 2.72 (t, *J* = 12.3 Hz, 1H), 2.69 (dq, *J* = 12.3 Hz, 1H), 2.37 (d, *J* = 13.6 Hz, 1H), 2.26 – 2.18 (m, 1H), 2.04 – 1.95 (m, 1H), 1.90 – 1.83 (m, 3H), 1.74 – 1.40 (m, 12H), 1.36 – 1.29 (m, 3H), 1.21 – 1.16 (m, 6H), 1.01 (d, *J* = 6.3 Hz, 3H), 0.92 – 0.83 (m, 12H), 0.80 – 0.78 (m, 6H).

<sup>13</sup>C NMR (101 MHz, CD<sub>3</sub>OD):  $\delta$  216.5, 178.0 (br), 86.5, 85.0, 77.4, 76.9, 74.2, 72.5, 72.2, 71.0, 66.9, 64.2, 56.8, 49.5, 41.4, 39.0, 38.6, 36.0, 32.8 (br), 32.4, 30.7, 30.2, 29.7, 28.5, 22.3, 19.6, 17.9, 17.1, 15.9, 15.5, 15.0, 12.4, 12.3, 8.9, 8.6, 6.8.

HRMS (ESI) *m/z* [M-H]<sup>-</sup> calc. for C<sub>33</sub>H<sub>57</sub>O<sub>8</sub>: 581.4059; found 581.4068.

## Sodium

**(Z)-2-(chloromethylene)-4-(2-((2R,3R,5R,6S)-6-((2R,3R,4R,6R)-6-((2S,3S,5S)-5-ethyl-5-((2R,5R,6S)-5-ethyl-5-hydroxy-6-methyltetrahydro-2H-pyran-2-yl)-3-methyltetrahydrofuran-2-yl)-3-hydroxy-4-methyl-5-oxooctan-2-yl)-3,5-dimethyltetrahydro-2H-pyran-2-yl)acetyl)-5-oxo-2,5-dihydrofuran-3-olate (HL201, 6-Na):**

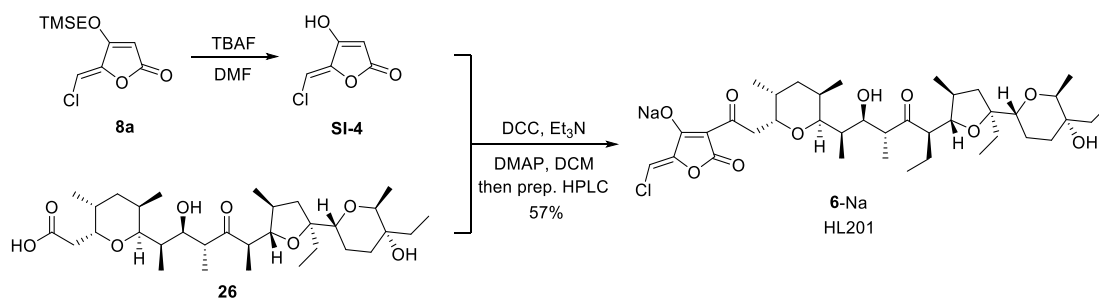

To a stirred solution of TMSE protected tetronate **8a** (49 mg, 0.20 mmol, 2.0 equiv) in DMF (3.6 mL) was added TBAF (1 M solution in THF, 0.40 mL, 0.40 mmol, 4.0 equiv). The mixture was stirred at r.t. for 4 h, then was acidified with 1 M HCl (aq) and diluted with ethyl acetate. The organic phase was thoroughly washed with water and brine, dried over anhydrous Na<sub>2</sub>SO<sub>4</sub>, and concentrated under vacuum. The crude tetronic acid **SI-4** was obtained as white solid almost quantitatively and directly used in the next coupling reaction without further purification.

To a flame dried Schlenk tube were added tetronic acid **SI-4** (crude solid, 0.20 mmol, 2.0 equiv) and acid **26** (58 mg, 0.10 mmol, 1.0 equiv). To this mixture, anhydrous DCM (4 mL) was added, followed by Et<sub>3</sub>N (0.028 mL, 0.20 mmol, 2.0 equiv) to give a clear solution. To this solution, DCC (41 mg, 0.20 mmol, 2.0 equiv) was added, followed by DMAP (4.0 mg, 0.033 mmol, 0.33 equiv). After 1 h, DCU started to precipitate. The mixture was stirred at r.t. for 24 h, till the full conversion of the acid **26**. The mixture was then diluted with ethyl acetate, and the organic phase was washed with 1 M HCl (aq) to remove DMAP and Et<sub>3</sub>N. Then the organic phase was washed with sat. NaHCO<sub>3</sub> (aq) to removed excess amount of tetronic acid **SI-4**, and the product **6** with ionophore property was transformed to its sodium salt **6-Na** and retained in the organic phase. The organic phase was dried over anhydrous Na<sub>2</sub>SO<sub>4</sub> and concentrated under vacuum. The residue was treated with MeCN, and the insoluble DCU was removed by filtration. The filtrate was concentrated again, and the residue was dissolved into MeCN/10 mM NaHCO<sub>3</sub> (aq) 1:1 v/v (10 mL in total) and filtered through PTFE membrane to give the sample solution for preparative HPLC separation (concentration of product ~ 10 mM). The sample was then separated on C18 preparative HPLC column using MeCN/10 mM NH<sub>4</sub>HCO<sub>3</sub> (aq) as eluent (40% to 50% MeCN gradient, multiple injections). The peak with strong UV absorption was eluted at 14 min and was collected. The collected solutions from all injections were combined and concentrated under vacuum to remove most of the MeCN, and the water phase was thoroughly extracted with DCM (5 × 100 mL). The combined or-

ganic phase was dried over anhydrous Na<sub>2</sub>SO<sub>4</sub> and concentrated under vacuum. The product **6-Na** (in sodium salt form as shown in the XRD structure), also named as HL201, was obtained as colorless solid (42.1 mg, 57%). The single crystal sample for XRD analysis was obtained via the single-tube method using MeCN as solvent.

R<sub>f</sub>: 0.52 (pentane/EtOAc 1:1).

$[\alpha]_D^{296.7 K} +114.3$  (c = 0.46, CH<sub>2</sub>Cl<sub>2</sub>).

IR  $\nu_{\max}$  (cm<sup>-1</sup>): 3409 (br), 2964, 2909, 2880, 1760, 1705, 1663, 1626, 1555, 1454, 1424, 1379, 1308, 1055, 988, 964, 949, 834.

<sup>1</sup>H NMR (500 MHz, d<sub>6</sub>-DMSO):  $\delta$  6.04 (s, 1H), 4.46 (d, *J* = 6.0 Hz, 1H), 4.16 – 4.12 (m, 1H), 3.91 (s, 1H), 3.79 – 3.75 (m, 2H), 3.66 (q, *J* = 7.0 Hz, 1H), 3.50 (d, *J* = 9.5 Hz, 1H), 3.40 (d, *J* = 11.0 Hz, 1H), 3.35 (dd, *J* = 13.5, 4.5 Hz, 1H), 2.88 – 2.81 (m, 1H), 2.63 – 2.61 (m, 1H), 2.47 (dd, *J* = 13.0, 9.0 Hz, 1H), 2.06 – 2.03 (m, 1H), 1.95 – 1.89 (m, 1H), 1.78 – 1.67 (m, 4H), 1.59 – 1.52 (m, 2H), 1.50 – 1.26 (m, 8H), 1.21 – 1.16 (m, 2H), 1.07 (d, *J* = 7.0 Hz, 3H), 0.95 (d, *J* = 6.0 Hz, 3H), 0.86 (d, *J* = 7.0 Hz, 3H), 0.83 (t, *J* = 7.5 Hz, 3H), 0.80 – 0.77 (m, 6H), 0.74 (d, *J* = 6.5 Hz, 6H), 0.66 (d, *J* = 6.5 Hz, 3H).

<sup>13</sup>C NMR (101 MHz, d<sub>6</sub>-DMSO):  $\delta$  214.5, 193.1, 178.4, 167.9, 148.9, 94.2, 94.1, 84.1, 83.7, 75.4, 74.7, 72.5, 70.8, 69.6, 69.5, 56.3, 46.1, 35.9, 35.7, 35.4, 34.9, 31.4, 29.3, 28.9, 28.4, 27.5, 21.2, 17.4, 16.9, 15.7, 14.6, 13.3, 12.8, 11.9, 7.8, 7.3, 6.4.

HRMS (ESI) *m/z* [M-Na]<sup>-</sup> calc. for C<sub>38</sub>H<sub>58</sub>ClO<sub>10</sub>: 709.3724; found 709.3765.

## Sodium

**(*Z*)-2-(bromomethylene)-4-(2-((2*R*,3*R*,5*R*,6*S*)-6-((2*R*,3*R*,4*R*,6*R*)-6-((2*S*,3*S*,5*S*)-5-ethyl-5-((2*R*,5*R*,6*S*)-5-ethyl-5-hydroxy-6-methyltetrahydro-2*H*-pyran-2-yl)-3-methyltetrahydrofuran-2-yl)-3-hydroxy-4-methyl-5-oxooctan-2-yl)-3,5-dimethyltetrahydro-2*H*-pyran-2-yl)acetyl)-5-oxo-2,5-dihydrofuran-3-olate (HL204, 29-Na):**



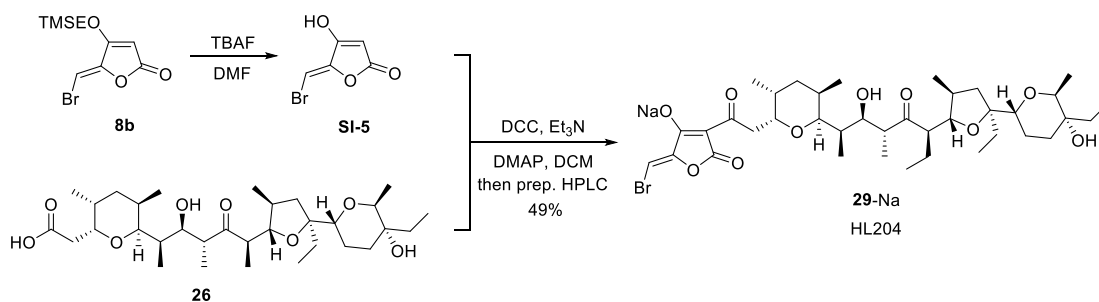

To a stirred solution of TMSE protected tetronate **8b** (23 mg, 0.080 mmol, 2.0 equiv) in DMF (1.6 mL) was added TBAF (1 M solution in THF, 0.16 mL, 0.16 mmol, 4.0 equiv). The mixture was stirred at r.t. for 4 h, then was acidified with 1 M HCl (aq) and diluted with ethyl acetate. The organic phase was thoroughly washed with water and brine, dried over anhydrous Na<sub>2</sub>SO<sub>4</sub>, and concentrated under vacuum. The crude tetronic acid **SI-5** was obtained as white solid almost quantitatively and directly used in the next coupling reaction without further purification.

To a flame dried Schlenk tube were added tetronic acid **SI-5** (crude solid, 0.080 mmol, 2.0 equiv) and acid **26** (23 mg, 0.040 mmol, 1.0 equiv). To this mixture, anhydrous DCM (2 mL) was added, followed by Et<sub>3</sub>N (0.011 mL, 0.080 mmol, 2.0 equiv) to give a clear solution. To this solution, DCC (16 mg, 0.080 mmol, 2.0 equiv) was added, followed by DMAP (1.6 mg, 0.013 mmol, 0.33 equiv). After 1 h, DCU started to precipitate. The mixture was stirred at r.t. for 24 h, till the full conversion of the acid **26**. The mixture was then diluted with ethyl acetate, and the organic phase was washed with 1 M HCl (aq) to removed DMAP and Et<sub>3</sub>N. Then the organic phase was washed with sat. NaHCO<sub>3</sub> (aq) to removed excess amount of tetronic acid **SI-5**, and the product **29** with ionophore property was transformed to its sodium salt **29-Na** and retained in the organic phase. The organic phase was dried over anhydrous Na<sub>2</sub>SO<sub>4</sub> and concentrated under vacuum. The residue was treated with MeCN, and the insoluble DCU was removed by filtration. The filtrate was concentrated again, and the residue was dissolved into MeCN/10 mM NaHCO<sub>3</sub> (aq) 1:1 v/v (10 mL in total) and filtered through PTFE membrane to give the sample solution for preparative HPLC separation (concentration of product ~ 10 mM). The sample was then separated on C18 preparative HPLC column using MeCN/10 mM NH<sub>4</sub>HCO<sub>3</sub> (aq) as eluent (30% to 50% MeCN gradient, multiple injections). The peak with strong UV absorption was eluted at 18 min and was collected. The collected solutions from all injections were combined and concentrated under vacuum to remove most of the MeCN, and the water phase was thoroughly extracted with DCM (5 × 100 mL). The com-

bined organic phase was dried over anhydrous Na<sub>2</sub>SO<sub>4</sub> and concentrated under vacuum. The product **29**-Na (in sodium salt form as shown in the XRD structure), also named as HL204, was obtained as colorless solid (15.2 mg, 49%). The single crystal sample for XRD analysis was obtained via the single-tube method using MeCN as solvent.

R<sub>f</sub>: 0.55 (pentane/EtOAc 1:1).

$[\alpha]_D^{296.7 K} +137.8$  (c = 0.50, DCM).

IR  $\nu_{max}$  (cm<sup>-1</sup>): 3418 (br), 2962, 2933, 2876, 1761, 1705, 1683, 1625, 1555, 1450, 1424, 1381, 1298, 1091, 988, 964, 949.

<sup>1</sup>H NMR (500 MHz, d<sub>6</sub>-DMSO):  $\delta$  6.06 (s, 1H), 4.46 (d, *J* = 6.0 Hz, 1H), 4.16 – 4.12 (m, 1H), 3.90 (s, 1H), 3.78 – 3.75 (m, 2H), 3.65 (q, *J* = 7.0 Hz, 1H), 3.50 (d, *J* = 9.0 Hz, 1H), 3.40 (d, *J* = 11.0 Hz, 1H), 3.36 – 3.32 (m, 1H), 2.88 – 2.81 (m, 1H), 2.64 – 2.61 (m, 1H), 2.46 (dd, *J* = 13.0, 8.5 Hz, 1H), 2.07 – 2.01 (m, 1H), 1.95 – 1.88 (m, 1H), 1.78 – 1.67 (m, 4H), 1.58 – 1.50 (m, 2H), 1.47 – 1.26 (m, 8H), 1.21 – 1.16 (m, 2H), 1.07 (d, *J* = 6.5 Hz, 3H), 0.95 (d, *J* = 6.5 Hz, 3H), 0.86 (d, *J* = 7.0 Hz, 3H), 0.82 (t, *J* = 7.0 Hz, 3H), 0.81 – 0.77 (m, 6H), 0.74 (d, *J* = 6.5 Hz, 6H), 0.66 (d, *J* = 6.5 Hz, 3H).

<sup>13</sup>C NMR (101 MHz, d<sub>6</sub>-DMSO):  $\delta$  214.7, 193.4, 178.0, 168.0, 151.0, 94.3, 84.2, 83.7, 82.8, 75.4, 74.7, 72.4, 70.7, 69.6, 69.5, 56.2, 46.1, 35.8, 35.7, 35.4, 34.9, 31.4, 29.3, 28.9, 28.4, 27.5, 21.1, 17.3, 16.7, 15.7, 14.5, 13.3, 12.9, 11.9, 7.9, 7.3, 6.4.

HRMS (ESI) *m/z* [M-Na]<sup>-</sup>: calcd. for C<sub>38</sub>H<sub>58</sub>BrO<sub>10</sub>: 753.3219; found: 753.3261.

## Sodium

**4-(2-((2*R*,3*R*,5*R*,6*S*)-6-((2*R*,3*R*,4*R*,6*R*)-6-((2*S*,3*S*,5*S*)-5-ethyl-5-((2*R*,5*R*,6*S*)-5-ethyl-5-hydroxy-6-methyltetrahydro-2*H*-pyran-2-yl)-3-methyltetrahydrofuran-2-yl)-3-hydroxy-4-methyl-5-oxooctan-2-yl)-3,5-dimethyltetrahydro-2*H*-pyran-2-yl)acetyl)-2-methylene-5-oxo-2,5-dihydrofuran-3-olate (HL224, 30-Na):**

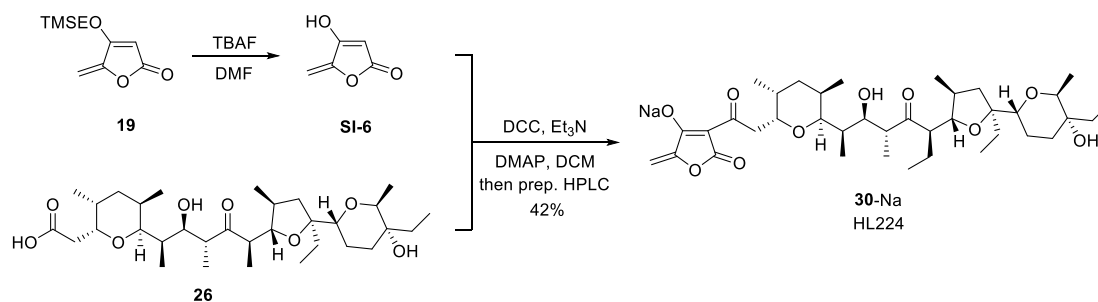

To a stirred solution of TMSE protected tetronate **19** (29 mg, 0.14 mmol, 3.0 equiv) in DMF (2.7 mL) was added TBAF (1 M solution in THF, 0.28 mL, 0.28 mmol, 6.0 equiv). The mixture was stirred at r.t. for 4 h, then was acidified with 1 M HCl (aq) and diluted with ethyl acetate. The organic phase was thoroughly washed with water and brine, and dried over anhydrous Na<sub>2</sub>SO<sub>4</sub>. During the workup process, some white precipitate was observed, which was attributed to the partial dimerization of the tetronic acid **SI-6** via hetero-Diels-Alder reaction. The amount of **SI-6** consumed in the side reaction was lower than 1/3, so the amount of **SI-6** obtained should be around 0.092 mmol (2.0 equiv). The precipitate was removed via filtration, and the filtrate was concentrated under vacuum. The crude tetronic acid **SI-6** was obtained as white solid and directly used in the next coupling reaction without further purification.

To a flame dried Schlenk tube were added tetronic acid **SI-6** (crude solid, 0.092 mmol, 2.0 equiv) and acid **26** (27 mg, 0.046 mmol, 1.0 equiv). To this mixture, anhydrous DCM (3 mL) was added, followed by Et<sub>3</sub>N (0.013 mL, 0.092 mmol, 2.0 equiv) to give a clear solution. To this solution, DCC (19 mg, 0.092 mmol, 2.0 equiv) was added, followed by DMAP (1.8 mg, 0.015 mmol, 0.33 equiv). After 1 h, DCU started to precipitate. The mixture was stirred at r.t. for 24 h, till the full conversion of the acid **26**. The mixture was then diluted with ethyl acetate, and the organic phase was washed with 1 M HCl (aq) to remove DMAP and Et<sub>3</sub>N. Then the organic phase was washed with sat. NaHCO<sub>3</sub> (aq) to remove excess amount of tetronic acid **SI-6**, and the product **30** with ionophore property was transformed to its sodium salt **30-Na** and retained in the organic phase. The organic phase was dried over anhydrous Na<sub>2</sub>SO<sub>4</sub> and concentrated under vacuum. The residue was treated with MeCN, and the insoluble DCU was removed by filtration. The filtrate was concentrated again, and the residue was dissolved into MeCN/10 mM NaHCO<sub>3</sub> (aq) 1:1 v/v (10 mL in total) and filtered through PTFE membrane to give the sample solution for preparative HPLC separation (concentration of product ~ 10 mM). The sample was then separated on C18 preparative HPLC column using MeCN/10

mM NH<sub>4</sub>HCO<sub>3</sub> (aq) as eluent (40% to 50% MeCN gradient, multiple injections). The peak with strong UV absorption was eluted at 14 min and was collected. The collected solutions from all injections were combined and concentrated under vacuum to remove most of the MeCN, and the water phase was thoroughly extracted with DCM (5 × 100 mL). The combined organic phase was dried over anhydrous Na<sub>2</sub>SO<sub>4</sub> and concentrated under vacuum. The product **30**-Na (in sodium salt form), also named as HL224, was obtained as colorless solid (15.2 mg, 42%).

R<sub>f</sub>: 0.34 (pentane/EtOAc 1:1).

$[\alpha]_{\text{D}}^{296.7\text{K}} +107.0$  (c = 0.34, DCM).

IR  $\nu_{\text{max}}$  (cm<sup>-1</sup>): 3411 (br), 2964, 2935, 2911, 2878, 1752, 1705, 1679, 1633, 1557, 1453, 1426, 1379, 1292, 1053, 988, 972, 949.

<sup>1</sup>H NMR (400 MHz, d<sub>6</sub>-DMSO):  $\delta$  4.74 (s, 1H), 4.57 (d, *J* = 6.0 Hz, 1H), 4.48 (s, 1H), 4.16 – 4.12 (m, 1H), 3.92 (s, 1H), 3.81 – 3.75 (m, 2H), 3.66 (q, *J* = 6.8 Hz, 1H), 3.50 (d, *J* = 10.0 Hz, 1H), 3.43 – 3.39 (m, 2H), 2.89 – 2.81 (m, 1H), 2.63 – 2.59 (m, 1H), 2.44 (dd, *J* = 12.8, 8.8 Hz, 1H), 2.08 – 2.01 (m, 1H), 1.96 – 1.88 (m, 1H), 1.79 – 1.70 (m, 4H), 1.62 – 1.52 (m, 2H), 1.48 – 1.16 (m, 10H), 1.07 (d, *J* = 6.8 Hz, 3H), 0.95 (d, *J* = 6.0 Hz, 3H), 0.87 – 0.74 (m, 18H), 0.66 (d, *J* = 6.8 Hz, 3H).

<sup>13</sup>C NMR (101 MHz, d<sub>6</sub>-DMSO):  $\delta$  214.7, 193.3, 180.0, 169.3, 154.2, 94.7, 85.5, 84.2, 83.7, 75.5, 74.8, 72.5, 70.7, 69.6, 69.5, 56.2, 46.1, 35.8, 35.7, 35.2, 35.0, 31.4, 29.3, 28.9, 28.4, 27.5, 21.1, 17.4, 16.7, 15.7, 14.5, 13.3, 13.0, 11.9, 7.9, 7.3, 6.4.

HRMS (ESI) *m/z* [M-Na]<sup>-</sup>: calcd. for C<sub>38</sub>H<sub>59</sub>O<sub>10</sub>: 675.4114; found: 675.4149.

## Sodium

**(Z)-2-(chloromethylene)-4-(2-((2*R*,3*R*,5*R*,6*S*)-6-((2*R*,3*R*,4*S*,6*R*)-6-((2*S*,3*S*,5*S*)-5-ethyl-5-((2*R*,5*R*,6*S*)-5-ethyl-5-hydroxy-6-methyltetrahydro-2*H*-pyran-2-yl)-3-methyltetrahydrofuran-2-yl)-3-hydroxy-4-methyl-5-oxooctan-2-yl)-3,5-dimethyltetrahydro-2*H*-pyran-2-yl)acetyl)-5-oxo-2,5-dihydrofuran-3-olate (HL160, 31-Na):**

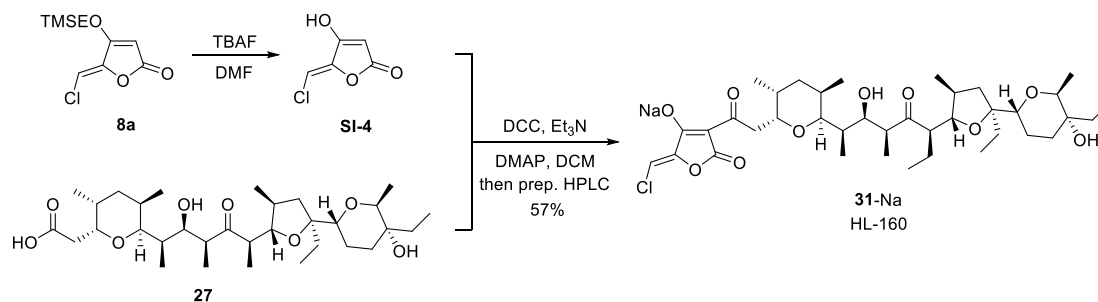

The product **31** was synthesized following the same procedure as product **6**, using acid **27** (undesired epimer of **26**) as the coupling partner. After workup, the crude mixture was dissolved into MeCN/10 mM NaHCO<sub>3</sub> (aq) 1:1 v/v (10 mL in total) and filtered through PTFE membrane to give the sample solution for preparative HPLC separation (concentration of product ~ 10 mM). The sample was then separated on C18 preparative HPLC column using MeCN/10 mM NH<sub>4</sub>HCO<sub>3</sub> (aq) as eluent (35% to 45% MeCN gradient, multiple injections). The peak with strong UV absorption was eluted at 13 min and was collected. The collected solutions from all injections were combined and concentrated under vacuum to remove most of the MeCN, and the water phase was thoroughly extracted with DCM (5 × 100 mL). The combined organic phase was dried over anhydrous Na<sub>2</sub>SO<sub>4</sub> and concentrated under vacuum. The product **31**-Na (in sodium salt form as shown in the XRD structure), also named as HL160, was obtained as colorless solid (42.2 mg, 57%). The single crystal sample for XRD analysis was obtained via single-tube method using MeCN as solvent.

R<sub>f</sub>: 0.69 (ethyl acetate).

$[\alpha]_{\text{D}}^{296.7 \text{ K}} -1.4$  (c = 0.71, DCM).

IR  $\nu_{\text{max}}$  (cm<sup>-1</sup>): 3408 (br), 2962, 2933, 2876, 1755, 1694, 1662, 1623, 1563, 1454, 1379, 1310, 1222, 1105, 1051, 1029, 989, 948, 833.

<sup>1</sup>H NMR (500 MHz, d<sub>6</sub>-DMSO):  $\delta$  6.08 (s, 1H), 4.63 (s, 1H), 4.16 (s, 1H), 3.87 (s, 1H), 3.76 (t, *J* = 8.0 Hz, 1H), 3.65 – 3.59 (m, 2H), 3.48 (d, *J* = 10.0 Hz, 1H), 3.38 – 3.33 (m, 1H), 2.80 – 2.74 (m, 1H), 2.54 – 2.50 (m, 1H), 2.44 – 2.36 (m, 1H), 2.06 – 2.00 (m, 1H), 1.89 – 1.82 (m, 1H), 1.80 – 1.70 (m, 3H), 1.63 – 1.51 (m, 3H), 1.47 – 1.32 (m, 6H), 1.24 – 1.16 (m, 5H), 1.08 (d, *J* = 7.0 Hz, 3H), 1.60 (d, *J* = 6.5 Hz, 3H), 0.91 (d, *J* = 6.0 Hz, 3H), 0.81 – 0.71 (m, 15H), 0.65 (d, *J* = 7.0 Hz, 3H).

<sup>13</sup>C NMR (101 MHz, d<sub>6</sub>-DMSO):  $\delta$  213.4, 94.2, 84.2, 82.5, 75.6, 74.4, 73.1, 70.4, 69.5, 68.5, 54.8, 47.5, 40.6, 37.2, 37.0, 36.2, 34.9, 31.4, 29.4, 28.3, 27.7, 27.3, 20.9, 17.7, 17.2, 16.7, 15.9,

14.6, 11.6(2), 11.5(6), 8.1, 7.9, 6.4. (The absence of four peaks from the 3-acyl tetronic acid unit and some broaden peaks were observed after > 20000 scans for 20 mg sample, due to the conformational flexibility.)

HRMS (ESI)  $m/z$   $[M-Na]^+$ : calcd. for  $C_{38}H_{58}ClO_{10}$ : 709.3724; found: 709.3773.

## Sodium

**(Z)-2-(chloromethylene)-4-(2-((2R,3R,5R,6S)-6-((2R,3S,4R,5S,6S)-6-((2S,3S,5S)-5-ethyl-5-((2R,5R,6S)-5-ethyl-5-hydroxy-6-methyltetrahydro-2H-pyran-2-yl)-3-methyltetrahydrofu-  
ran-2-yl)-3,5-dihydroxy-4-methyloctan-2-yl)-3,5-dimethyltetrahydro-2H-pyran-2-yl)acet-  
yl)-5-oxo-2,5-dihydrofuran-3-olate (HL342, 32-Na):**

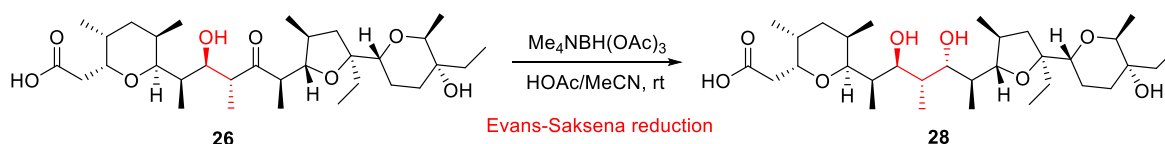

To a solution of  $Me_4NBH(OAc)_3$  (132 mg, 0.5 mmol, 10 eq.) in MeCN (1.0 mL) was added HOAc (1.0 mL). The solution was stirred for 30 min at rt and then cooled to 0 °C before the ketone **26** (29.1 mg, 0.05 mmol, 1.0 eq.) in MeCN/AcOH (1:1) (1.0 mL) was added dropwise. The obtained mixture was warmed to rt and stirred for 72 h at rt. The reaction mixture was diluted with EtOAc and poured into sat.  $NaHCO_3$ . Solid  $NaHCO_3$  was added until  $pH > 7$ . Then Rochelles salt solution was added and the mixture was stirred for another 2 h. The layers were separated and the aqueous layer was extracted with EtOAc. The combined organic layers were washed with sat. aq.  $NaHCO_3$ , aq. 0.1 N HCl, brine and dried over  $Na_2SO_4$ , filtered, and concentrated to give the crude product **28** which was used directly in the next step.

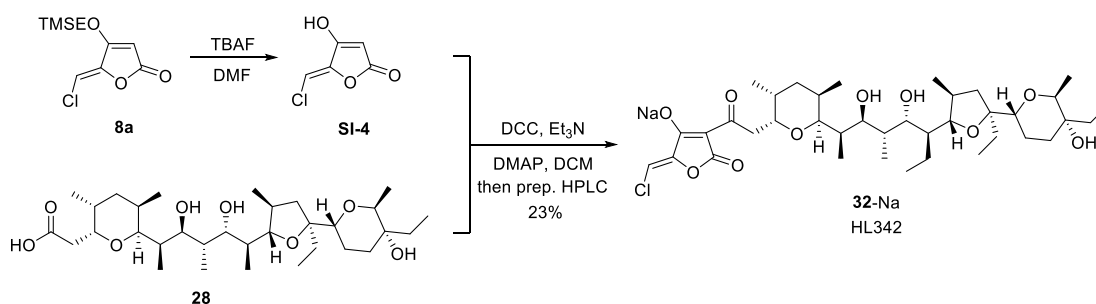

The product **32** was synthesized following the same procedure as product **6**, using crude acid **28** (obtained via 1,3-*anti* reduction of acid **26** on 0.05 mmol scale) as the coupling partner. After workup, the crude mixture was dissolved into MeCN/10 mM  $NaHCO_3$  (aq) 1:1 v/v (10

mL in total) and filtered through PTFE membrane to give the sample solution for preparative HPLC separation (concentration of product ~ 10 mM). The sample was then separated on a C18 preparative HPLC column using MeCN/10 mM NH<sub>4</sub>HCO<sub>3</sub> (aq) as eluent (40% to 50% MeCN gradient, multiple injections). The peak with strong UV absorption was eluted at 18 min and was collected. The collected solutions from all injections were combined and concentrated under vacuum to remove most of the MeCN, and the water phase was thoroughly extracted with DCM (5 × 100 mL). The combined organic phase was dried over anhydrous Na<sub>2</sub>SO<sub>4</sub> and concentrated under vacuum. The product **32**-Na (in sodium salt form), also named as HL342, was obtained as colorless solid (8.4 mg, 23%).

R<sub>f</sub>: 0.67 (pentane/EtOAc 1:1).

$[\alpha]_D^{296.7K} +83.8$  (c = 0.42, DCM).

IR  $\nu_{\max}$  (cm<sup>-1</sup>): 3435 (br), 2961, 2935, 2878, 1741, 1661, 1626, 1557, 1453, 1422, 1380, 1310, 1221, 1091, 1083, 990, 964, 947, 834.

<sup>1</sup>H NMR (400 MHz, d<sub>6</sub>-DMSO):  $\delta$  6.06 (s, 1H), 4.18 – 4.16 (m, 1H), 4.12 (d, *J* = 6.4 Hz, 1H), 3.86 (s, 1H), 3.90 – 3.83 (m, 1H), 3.78 (d, *J* = 10.0 Hz, 1H), 3.66 (q, *J* = 6.8 Hz, 1H), 3.56 – 3.48 (m, 2H), 3.44 – 3.35 (m, 2H), 2.46 – 2.40 (m, 1H), 2.08 – 2.00 (m, 1H), 1.96 – 1.88 (m, 1H), 1.86 (dd, *J* = 12.4, 8.0 Hz, 1H), 1.73 (br, 1H), 1.66 – 1.33 (m, 13H), 1.26 – 1.17 (m, 4H), 1.11 (d, *J* = 6.8 Hz, 3H), 0.91 – 0.78 (m, 15H), 0.72 (d, *J* = 6.8 Hz, 3H), 0.61 (d, *J* = 6.8 Hz, 3H), 0.58 (d, *J* = 6.8 Hz, 3H).

<sup>13</sup>C NMR (101 MHz, d<sub>6</sub>-DMSO):  $\delta$  194.0, 178.4, 168.7, 148.8, 94.5, 94.4, 84.2, 83.7, 75.7, 74.1, 72.8, 70.3, 69.8, 69.6, 67.7, 42.6, 37.6, 37.0, 36.0, 34.90, 34.86, 31.2, 29.5, 28.3, 28.0, 27.2, 20.7, 17.8, 17.2, 15.8, 14.6, 13.9, 11.7, 9.6, 8.2, 7.3, 6.4.

HRMS (ESI) *m/z* [M-Na]<sup>-</sup>: calcd. for C<sub>38</sub>H<sub>60</sub>ClO<sub>10</sub>: 711.3880; found: 711.3919.

**(2*S*,2'*R*,2''*R*,3''*S*,5'*S*,5''*R*)-5''-((2*S*,3*S*,5*R*)-3,5-Dimethyl-6-oxotetrahydro-2*H*-pyran-2-yl)-5'-ethyl-2,3''-dimethyldecahydro-[2,2':5',2''-terfuran]-5(2*H*)-one (33):**

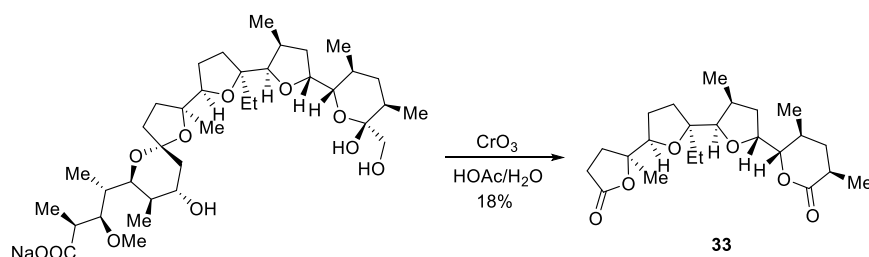

To a 250 mL round bottom flask, HOAc (36 mL) and H<sub>2</sub>O (9 mL) were added, followed by CrO<sub>3</sub> (4.08 g, 40.8 mmol, 9.4 equiv). The mixture was cooled to 0 °C, then the solution of monensin sodium salt (3.00 g, 4.33 mmol, 1.0 equiv) in HOAc (42 mL) was added. The mixture was stirred at 0 °C to r.t. overnight. The mixture was then diluted with sat. NaCl solution (100 mL) and was extracted with CHCl<sub>3</sub> (5 × 100 mL). The combined organic phase was concentrated under vacuum, and the residue was co-evaporated with heptane to remove HOAc. The residue was then dissolved in water and extracted with EtOAc (3 × 100 mL). The combined organic phase was washed with sat. NaHCO<sub>3</sub> solution and brine, and dried over anhydrous Na<sub>2</sub>SO<sub>4</sub>. The solvent was removed under vacuum, and the residue was purified by silica gel column chromatography using heptane/EtOAc 3:1 to 2:1 v/v as eluent. The pure dilactone product **33** was obtained after two rounds of column chromatography separation as colorless syrup (311 mg, 18%). The product show identical spectroscopic data as the reported.<sup>7,8</sup>

R<sub>f</sub>: 0.31 (heptane/EtOAc 1:1).

<sup>1</sup>H NMR (400 MHz, in CDCl<sub>3</sub>): δ 4.24 – 4.29 (m, 1H), 4.07 (dd, *J*<sub>1</sub> = 9.6 Hz, *J*<sub>2</sub> = 4.0 Hz, 1H), 4.02 (d, *J* = 4.0 Hz, 1H), 3.90 (dd, *J*<sub>1</sub> = 10.0 Hz, *J*<sub>2</sub> = 6.4 Hz, 1H), 2.84 (ddd, *J*<sub>1</sub> = 18.0 Hz, *J*<sub>2</sub> = 10.8 Hz, *J*<sub>3</sub> = 8.4 Hz, 1H), 2.63 (ddd, *J*<sub>1</sub> = 12.4 Hz, *J*<sub>2</sub> = 10.4 Hz, *J*<sub>3</sub> = 4.0 Hz, 1H), 2.39–2.48 (m, 2H), 2.24 – 2.32 (m, 1H), 2.09 – 2.15 (m, 1H), 2.05 (ddd, *J*<sub>1</sub> = 12.0 Hz, *J*<sub>2</sub> = 9.6 Hz, *J*<sub>3</sub> = 6.4 Hz, 1H), 1.90 (ddd, *J*<sub>1</sub> = 13.2 Hz, *J*<sub>2</sub> = 6.0 Hz, *J*<sub>3</sub> = 4.0 Hz, 1H), 1.46 – 1.84 (m, 8H), 1.38 (q, *J* = 12.4 Hz, 1H), 1.31 (s, 3H), 1.26 (d, *J* = 7.2 Hz, 3H), 1.07 (d, *J* = 6.8 Hz, 3H), 0.93 (d, *J* = 7.2 Hz, 3H), 0.91 (t, *J* = 7.6 Hz, 3H).

<sup>13</sup>C NMR (101 MHz, in CDCl<sub>3</sub>): δ 178.0, 174.0, 88.3, 88.1, 87.5, 86.8, 82.7, 77.4, 37.5, 36.2, 35.0, 34.9, 31.7, 30.4, 30.3, 30.0, 29.2, 28.3, 23.8, 18.4, 17.3, 15.7, 8.0.

**(2*S*,2'*R*,2''*R*,3''*S*,5'*S*,5''*R*)-5''-((7*S*,8*S*,10*R*)-8,10-Dimethyl-1,4,6-trioxaspiro[4.5]decan-7-yl)-5'-ethyl-2,3''-dimethyldecahydro-[2,2':5',2''-terfuran]-5(2H)-one (**34**):**

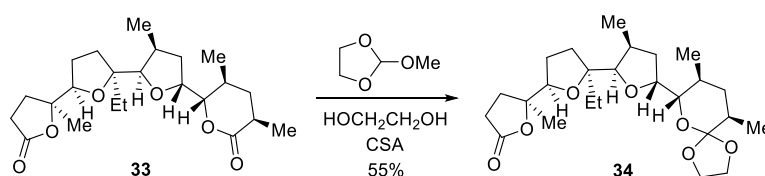



To a round bottom flask containing the dilactone **33** (152 mg, 0.372 mmol, 1.0 equiv), ethylene glycol (0.042 mL, 0.744 mmol, 2.0 equiv) and 2-methoxy-1,3-dioxolane (1.78 mL, 18.6 mmol, 50 equiv) were added, followed by camphorsulfonic acid (17 mg, 0.074 mmol, 0.20 equiv). The mixture was stirred at r.t. overnight. The reaction was then quenched by sat. NaHCO<sub>3</sub> solution, and the mixture was diluted with EtOAc. The organic phase was washed sequentially with sat. NaHCO<sub>3</sub> solution and brine, dried over anhydrous Na<sub>2</sub>SO<sub>4</sub>, and concentrated under vacuum. The residue was purified by silica gel column chromatography (buffered with Et<sub>3</sub>N) using heptane/EtOAc 6:1 *v/v* as eluent. The product **34** was obtained as colorless liquid (92 mg, 55%). The product show identical spectroscopic data as the reported.<sup>9,10</sup>

R<sub>f</sub>: 0.62 (heptane/EtOAc 1:1).

<sup>1</sup>H NMR (400 MHz, in C<sub>6</sub>D<sub>6</sub>): δ 4.17 – 4.23 (m, 2H), 4.13 (d, *J* = 4.4 Hz, 1H), 4.07 (q, *J* = 6.8 Hz, 1H), 3.71 – 3.77 (m, 3H), 3.65 – 3.70 (m, 1H), 2.89 (ddd, *J*<sub>1</sub> = 17.6 Hz, *J*<sub>2</sub> = 10.4 Hz, *J*<sub>3</sub> = 8.4 Hz, 1H), 2.26 – 2.37 (m, 2H), 2.19 (ddd, *J*<sub>1</sub> = 17.2 Hz, *J*<sub>2</sub> = 10.4 Hz, *J*<sub>3</sub> = 4.4 Hz, 1H), 1.94 – 2.10 (m, 3H), 1.47 – 1.56 (m, 1H), 1.14 – 1.43 (m, 9H), 1.03 (d, *J* = 6.8 Hz, 3H), 1.02 (s, 3H), 0.84 (t, *J* = 7.2 Hz, 3H), 0.71 (d, *J* = 6.8 Hz, 3H), 0.70 (d, *J* = 6.4 Hz, 3H).

<sup>13</sup>C NMR (101 MHz, in C<sub>6</sub>D<sub>6</sub>): δ 176.4, 121.4, 87.7, 87.0, 84.7, 81.8, 81.5, 77.2, 65.1, 64.8, 39.6, 36.7, 35.0, 34.1, 33.3, 30.2, 30.1, 29.8, 28.5, 28.4, 23.7, 17.3, 16.4, 15.5, 8.2.

## Methyl

**(*S,Z/E*)-6-((2*S*,2'*R*,3'*S*,5*R*,5'*R*)-5'-((7*S*,8*S*,10*R*)-8,10-dimethyl-1,4,6-trioxaspiro[4.5]decan-7-yl)-2-ethyl-3'-methyloctahydro-[2,2'-bifuran]-5-yl)-6-hydroxyhept-2-enoate (**36**):**

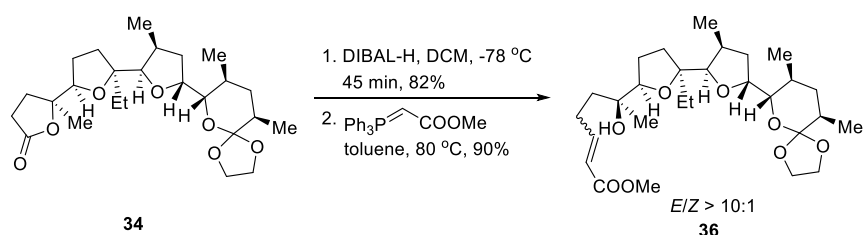

To a round bottom flask containing mono-protected dilactone **34** (92 mg, 0.202 mmol, 1.0 equiv), anhydrous DCM (5 mL) was added. The solution was cooled to -78 °C, then DIBAL-H (1.0 M solution in heptane, 0.283 mL, 0.283 mmol, 2.0 equiv) was added dropwise. The mixture was then stirred at -78 °C for 45 min. The reaction was quenched by MeOH, then water was added and the mixture was further stirred at r.t. for 30 min. The mixture was ex-

tracted with DCM, and the combined organic phase was washed with brine and dried over anhydrous Na<sub>2</sub>SO<sub>4</sub>. The solvent was removed under vacuum, and the residue was purified by silica gel column chromatography (buffered with Et<sub>3</sub>N) using heptane/EtOAc 2:1 v/v as eluent. The hemiacetal product **35** (mixture of two diastereomers) was obtained as colorless oil (76 mg, 82%), which was directly used in the next step.

To the round bottom flask containing the hemiacetal **35** (61 mg, 0.133 mmol, 1.0 equiv), anhydrous toluene (3 mL) was added, followed by ylide reagent (67 mg, 0.200 mmol, 1.5 equiv). The mixture was stirred at 80 °C overnight. After cooled down to r.t., the mixture was directly purified by silica gel column chromatography (buffered with Et<sub>3</sub>N) using heptane/EtOAc 6:1 v/v as eluent. The product **36** was obtained as colorless oil (*E/Z* > 10:1, 62 mg, 90%). The pure *E* product was obtained in pure form for characterization.

R<sub>f</sub>: 0.43 (heptane/EtOAc 3:1).

[α]<sub>D</sub><sup>296.6 K</sup>: +63.3 (*c* = 1.1, DCM).

IR ν<sub>max</sub> (cm<sup>-1</sup>): 3439, 2965, 2923, 2880, 1725, 1656, 1462, 1271, 1094, 1039, 949.

<sup>1</sup>H NMR (400 MHz, in C<sub>6</sub>D<sub>6</sub>, pure *E* isomer): δ 7.16 (dt, *J*<sub>1</sub> = 15.6 Hz, *J*<sub>2</sub> = 7.2 Hz, 1H), 5.93 (dt, *J*<sub>1</sub> = 15.6 Hz, *J*<sub>2</sub> = 1.6 Hz, 1H), 4.33 – 4.38 (m, 1H), 4.22 (d, *J* = 4.0 Hz, 1H), 4.13 – 4.19 (m, 3H), 3.85 (dd, *J*<sub>1</sub> = 10.4 Hz, *J*<sub>2</sub> = 2.8 Hz, 1H), 3.62 – 3.71 (m, 3H), 3.43 (s, 3H), 2.31 – 2.48 (m, 2H), 2.16 – 2.28 (m, 2H), 2.01 – 2.15 (m, 2H), 1.90 – 1.98 (m, 1H), 1.62 – 1.71 (m, 1H), 1.55 (ddd, *J*<sub>1</sub> = 13.2 Hz, *J*<sub>2</sub> = 12.0 Hz, *J*<sub>3</sub> = 4.8 Hz, 1H), 1.29 (s, 3H), 1.24 – 1.41 (m, 5H), 1.11 – 1.21 (m, 3H), 1.06 (d, *J* = 6.8 Hz, 3H), 0.93 (t, *J* = 7.2 Hz, 3H), 0.68 (d, *J* = 6.8 Hz, 3H), 0.52 (d, *J* = 6.8 Hz, 3H).

<sup>13</sup>C NMR (100 MHz, in C<sub>6</sub>D<sub>6</sub>, pure *E* isomer): δ 166.7, 150.3, 121.4, 121.1, 87.6, 87.5, 85.1, 80.3, 76.4, 73.0, 64.9, 64.1, 50.9, 39.4, 37.0, 36.5, 34.9, 32.9, 32.5, 31.3, 30.0, 27.7, 26.8, 24.8, 16.7, 15.9, 15.5, 8.1.

HRMS (ESI) *m/z* [M+H]<sup>+</sup> calc. for C<sub>28</sub>H<sub>47</sub>O<sub>8</sub>: 511.3265; found: 511.3280.

## Sodium

**(*Z*)-2-(Chloromethylene)-4-(2-(((2*S*,2'*R*,2''*R*,3''*S*,5*S*/*R*,5'*S*,5''*R*)-5''-((2*S*,3*S*,5*R*)-3,5-dimethyl-6-oxotetrahydro-2H-pyran-2-yl)-5'-ethyl-2,3''-dimethyldodecahydro-[2,2':5',2''-terfuran]-5-yl)acetyl)-5-oxo-2,5-dihydrofuran-3-olate (HL675A, 39a-Na/HL675B, 39b-Na):**

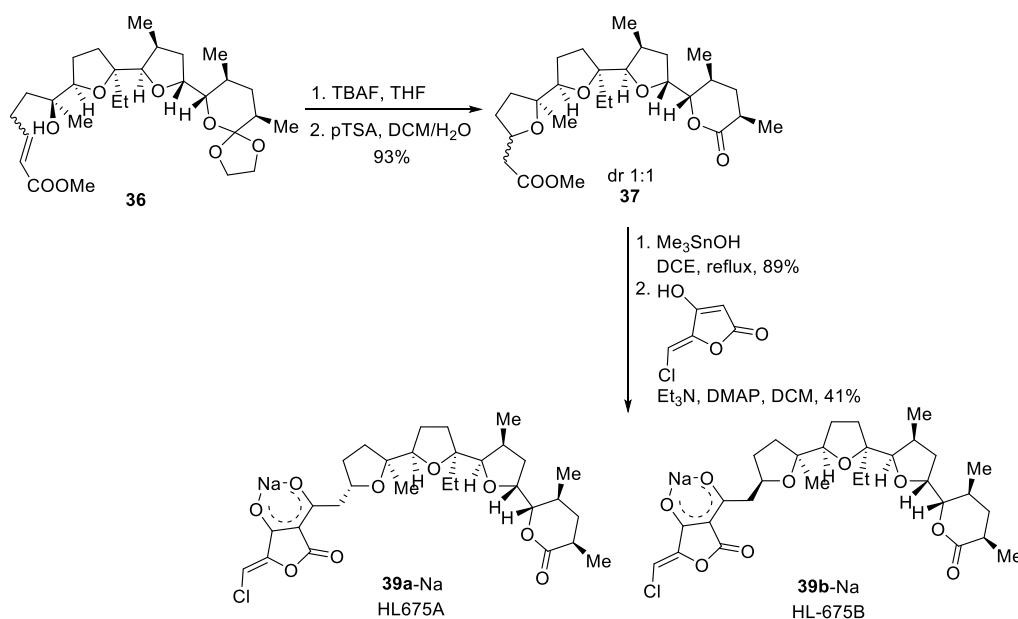

According to Fürstner's procedure<sup>11</sup>, to a round bottom flask containing the enoate **36** (64 mg, 0.125 mmol, 1.0 equiv), anhydrous THF (6.2 mL, 50 mL/mmol substrate) was added. The mixture was cooled to 0 °C, then TBAF (1 M solution in THF, 0.188 mL, 0.188 mmol, 1.5 equiv) was added. The mixture was stirred at 0 °C for 3 h, then full conversion of the enoate was observed. The mixture was diluted with EtOAc and washed thoroughly with water and brine. The organic phase was dried over anhydrous Na<sub>2</sub>SO<sub>4</sub> and concentrated under vacuum. The crude residue was dissolved in DCM (5 mL). To this mixture, water (0.05 mL) was added, followed by *p*-toluenesulfonic acid monohydrate (24 mg, 0.125 mmol, 1.0 equiv). The mixture was stirred at r.t. for 2 h. After full conversion of the orthoester, the mixture was diluted with DCM. The organic phase was washed with sat. NaHCO<sub>3</sub> solution and brine, and dried over anhydrous Na<sub>2</sub>SO<sub>4</sub>. The solvent was removed under vacuum, and the residue was purified by silica gel column chromatography using heptane/EtOAc 5:1 to 3:1 *v/v* as eluent. The product **37** was obtained as colorless oil (1:1 mixture of diastereomers, 54 mg, 93%).

To a round bottom flask containing the methyl ester **37** (49 mg, 0.105 mmol, 1.0 equiv), Me<sub>3</sub>SnOH (95 mg, 0.525 mmol, 5.0 equiv) was added, followed by anhydrous 1,2-dichloroethane (DCE, 5 mL). The mixture was heated to reflux and stirred under argon for 48 h. After full conversion of the methyl ester, the mixture was cooled to r.t., and acidified with 1 M HCl solution. The organic phase was washed with 1 M HCl solution and water, dried over anhydrous Na<sub>2</sub>SO<sub>4</sub>, and concentrated under vacuum. The residue was purified by silica gel column chromatography using heptane/EtOAc 2:1 to 1:1 *v/v* (with 0.1% *v/v* HOAc

added) as eluent. The acid product **38** (HL749) was obtained as colorless oil (1:1 mixture of diastereomers, 42 mg, 89%).

To a flame dried Schlenk tube containing tetronic acid (crude solid prepared from **8a** as mentioned before, 0.080 mmol, 2.0 equiv), the acid (1:1 mixture of diastereomers, 18 mg, 0.040 mmol, 1.0 equiv) was added, followed by anhydrous DCM (2 mL). To this mixture, Et<sub>3</sub>N (0.011 mL, 0.080 mmol, 2.0 equiv) was added, followed by DCC (17 mg, 0.080 mmol, 2.0 equiv) and DMAP (1.6 mg, 0.013 mmol, 0.33 equiv). The mixture was stirred at r.t. under argon overnight, and the formation of white precipitate DCU was observed. The mixture was then diluted with ethyl acetate, and the organic phase was washed with 1 M HCl (aq) to removed DMAP and Et<sub>3</sub>N. Then the organic phase was washed with sat. NaHCO<sub>3</sub> (aq) to removed excess amount of tetronic acid, and the product with ionophore property was transformed to its sodium salt and retained in the organic phase. The organic phase was dried over anhydrous Na<sub>2</sub>SO<sub>4</sub> and concentrated under vacuum. The residue was treated with MeCN, and the insoluble DCU was removed by filtration. The filtrate was concentrated again, and the residue was separated by preparative TLC using EtOAc as eluent to separate the two diastereomers. The upper spot A and lower spot B were further purified respectively by preparative HPLC on C18 column using MeCN/10 mM NH<sub>4</sub>HCO<sub>3</sub> (aq) as eluent (45% to 60% MeCN gradient, multiple injections). Both spots A and B were eluted at the same retention time (8.3 min). For each spot, the collected fractions were combined and concentrated under vacuum to remove MeCN. Then the water solution was extracted repeatedly with DCM (5 × 100 mL). The combined organic phase was dried over anhydrous Na<sub>2</sub>SO<sub>4</sub> and concentrated under vacuum. The spot A (sodium salt) **39a**-Na, also named as HL675A, was obtained as white solid (5.8 mg), and the spot B (sodium salt) **39b**-Na, also named as HL675B, was obtained as white solid (4.0 mg). The combined yield for the two diastereomers was 41%. The configuration of the new chiral center in **39a**-Na and **39b**-Na was assigned ambiguously, based on the comparison of the structures with the reported XRD structure of monensin-Na complex. The structure of **39a**-Na bearing *S* configuration at the new chiral center overlaps well with monensin-Na, which leads to sharp <sup>13</sup>C signals for the tetronate group. Meanwhile, the structure of **39b**-Na bearing *R* configuration at the new chiral center shows much inferior overlap with monensin-Na, which leads to flexible complex structure in solution phase and broaden (even disappearing) <sup>13</sup>C signals of the tetronate group.

**Compound HL675A (39a-Na):**

R<sub>f</sub>: 0.40 (EtOAc).

$[\alpha]_{\text{D}}^{296.6 \text{ K}}$ : -35.6 ( $c = 0.32$ , DCM).

IR  $\nu_{\text{max}}$  (cm<sup>-1</sup>): 2965, 2917, 1754, 1713, 1664, 1624, 1454, 1377, 1220, 1087, 935, 735.

<sup>1</sup>H NMR (500 MHz, in d<sub>6</sub>-DMSO):  $\delta$  6.03 (s, 1H), 4.18 – 4.23 (m, 2H), 4.05 (dd,  $J_1 = 9.0$  Hz,  $J_2 = 4.5$  Hz, 1H), 3.90 (d,  $J = 4.5$  Hz, 1H), 3.62 (dd,  $J_1 = 9.0$  Hz,  $J_2 = 6.5$  Hz, 1H), 2.93 (dd,  $J_1 = 14.5$  Hz,  $J_2 = 6.0$  Hz, 1H), 2.74 (dd,  $J_1 = 14.5$  Hz,  $J_2 = 7.5$  Hz, 1H), 2.46 – 2.49 (m, 1H), 2.23 – 2.27 (m, 1H), 1.91 – 2.04 (m, 4H), 1.74 – 1.81 (m, 3H), 1.56 – 1.64 (m, 2H), 1.43 – 1.54 (m, 5H), 1.36 (q,  $J = 12.5$  Hz, 1H), 1.10 (d,  $J = 7.0$  Hz, 3H), 1.05 (s, 3H), 1.01 (d,  $J = 6.0$  Hz, 3H), 0.92 (d,  $J = 7.0$  Hz, 3H), 0.86 (t,  $J = 7.5$  Hz, 3H).

<sup>13</sup>C NMR (125 MHz, in d<sub>6</sub>-DMSO):  $\delta$  190.7, 178.3, 173.7, 168.6, 148.9, 94.4, 94.1, 87.3, 86.1, 84.9, 83.4, 82.8, 77.2, 76.1, 47.1, 36.3, 35.1, 35.0, 34.4, 33.7, 31.5, 30.8, 30.3, 28.8, 28.1, 23.4, 18.2, 16.8, 15.5, 8.0.

HRMS (ESI)  $m/z$  [M-H]<sup>-</sup> calc. for C<sub>30</sub>H<sub>40</sub>ClO<sub>9</sub>: 579.2366; found: 579.2392.

**Compound HL675B (39b-Na):**

R<sub>f</sub>: 0.28 (EtOAc).

$[\alpha]_{\text{D}}^{296.6 \text{ K}}$ : +55.4 ( $c = 0.27$ , DCM).

IR  $\nu_{\text{max}}$  (cm<sup>-1</sup>): 2968, 2915, 1754, 1732, 1626, 1448, 1085, 943, 736.

<sup>1</sup>H NMR (500 MHz, in d<sub>6</sub>-DMSO):  $\delta$  6.01 (s, 1H), 4.18 – 4.23 (m, 2H), 4.05 (dd,  $J_1 = 9.0$  Hz,  $J_2 = 4.5$  Hz, 1H), 3.92 (d,  $J = 4.5$  Hz, 1H), 3.59 (dd,  $J_1 = 9.0$  Hz,  $J_2 = 6.5$  Hz, 1H), 2.95 (dd,  $J_1 = 14.5$  Hz,  $J_2 = 6.0$  Hz, 1H), 2.69 (dd,  $J_1 = 14.5$  Hz,  $J_2 = 7.5$  Hz, 1H), 2.47 – 2.52 (m, 1H), 2.23 – 2.27 (m, 1H), 1.89 – 2.02 (m, 4H), 1.74 – 1.82 (m, 3H), 1.59 – 1.67 (m, 2H), 1.44 – 1.55 (m, 5H), 1.34 (q,  $J = 12.5$  Hz, 1H), 1.09 (d,  $J = 7.0$  Hz, 3H), 1.02 (s, 3H), 1.00 (d,  $J = 6.5$  Hz, 3H), 0.92 (d,  $J = 7.0$  Hz, 3H), 0.87 (t,  $J = 7.5$  Hz, 3H).

<sup>13</sup>C NMR (125 MHz, in d<sub>6</sub>-DMSO):  $\delta$  178.3, 173.7, 168.5, 94.3, 93.9, 87.3, 86.0, 84.7, 83.3, 82.5, 77.2, 74.9, 46.7, 36.3, 35.1, 35.0, 34.8, 34.4, 31.4, 30.8, 30.5, 28.8, 27.6, 21.7, 18.2, 16.8, 15.6, 8.0. (The absence of two peaks from the 3-acyl tetronic acid unit and some broaden peaks were observed after > 20000 scans due to the conformational flexibility.)

HRMS (ESI)  $m/z$  [M-H]<sup>-</sup> calc. for C<sub>30</sub>H<sub>40</sub>ClO<sub>9</sub>: 579.2366; found: 579.2387.

## References

1. Bruker. Apex2, SADABS (2016/2) and SAINT (Version 8.38A). (2016).
2. Sheldrick, G. M. SHELXT – Integrated space-group and crystal-structure determination. *Acta Crystallogr. Sect. A Found. Adv.* **A71**, 3–8 (2015).
3. Sheldrick, G. M. Crystal structure refinement with SHELXL. *Acta Crystallogr. Sect. C Struct. Chem.* **C71**, 3–8 (2015).
4. Dolomanov, O. V., Bourhis, L. J., Gildea, R. J., Howard, J. A. K. & Puschmann, H. OLEX2 : a complete structure solution, refinement and analysis program. *J. Appl. Crystallogr.* **42**, 339–341 (2009).
5. Rigaku Oxford Diffraction. CrysAlisPro 1.171.39.46. (2018).
6. Schobert, R. & Jagusch, C. Solution-phase and solid-phase syntheses of enzyme inhibitor RK-682 and antibiotic agglomerins. *J. Org. Chem.* **70**, 6129–6132 (2005).
7. Sood, G. R., Ashworth, D. M., Ajaz, A. A. & Robinson, J. A. Biosynthesis of the polyether antibiotic monensin-A. Results from the incorporations of labelled acetate and propionate as a probe of the carbon chain assembly processes. *J. Chem. Soc. Perkin Trans. 1* 3183 (1988).
8. Day, L. E. *et al.* Biosynthesis of monensin. *Antimicrob. Agents Chemother.* **4**, 410–414 (1973).
9. Cai, D. & Still, W. C. Synthesis of monensin. Reconstruction from degradation products. *J. Org. Chem.* **53**, 4641–4643 (1988).
10. Collum, D. B., McDonald, J. H. & Still, W. C. Synthesis of the polyether antibiotic monensin. 1. Strategy and degradations. *J. Am. Chem. Soc.* **102**, 2117–2118 (1980).
11. Valot, G. *et al.* Total Synthesis of Amphidinolide F. *Angew. Chemie Int. Ed.* **52**, 9534–9538 (2013).

Compound 4

3.7642  
3.7471  
3.5672  
3.5539  
3.5431  
3.4890  
3.4668  
2.6251  
2.6132  
2.5997  
2.5953  
2.5902  
2.5857  
2.5771  
2.5736  
2.5668  
2.5603  
2.5495  
2.4689  
2.4509  
2.4229  
1.8547  
1.8343  
1.8234  
1.8032  
1.7538  
1.7358  
1.7277  
1.6243  
1.6141  
1.6108  
1.6071  
1.5972  
1.5897  
1.5735  
1.5676  
1.5588  
1.5450  
1.5407  
1.5325  
1.5275  
1.5153  
1.5084  
1.5007  
1.4938  
1.4901  
1.4740  
1.4693  
1.4623  
1.4552  
1.4463  
1.4356  
1.4151  
1.3968  
1.3837  
1.3797  
1.3662  
1.3623  
1.3484  
1.3404  
1.3296  
1.3217  
1.3109  
1.3036  
1.2858  
1.1970  
1.1797  
1.0207  
1.0027  
0.9847  
0.9088  
0.8984  
0.8902  
0.8824  
0.8715  
0.8327  
0.8143  
0.7957

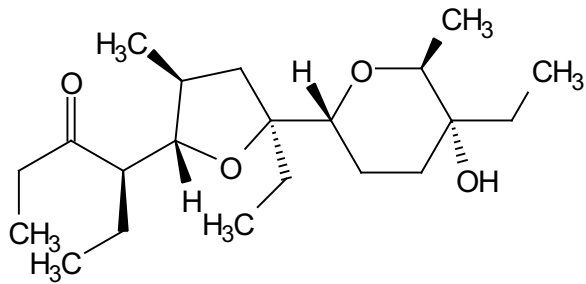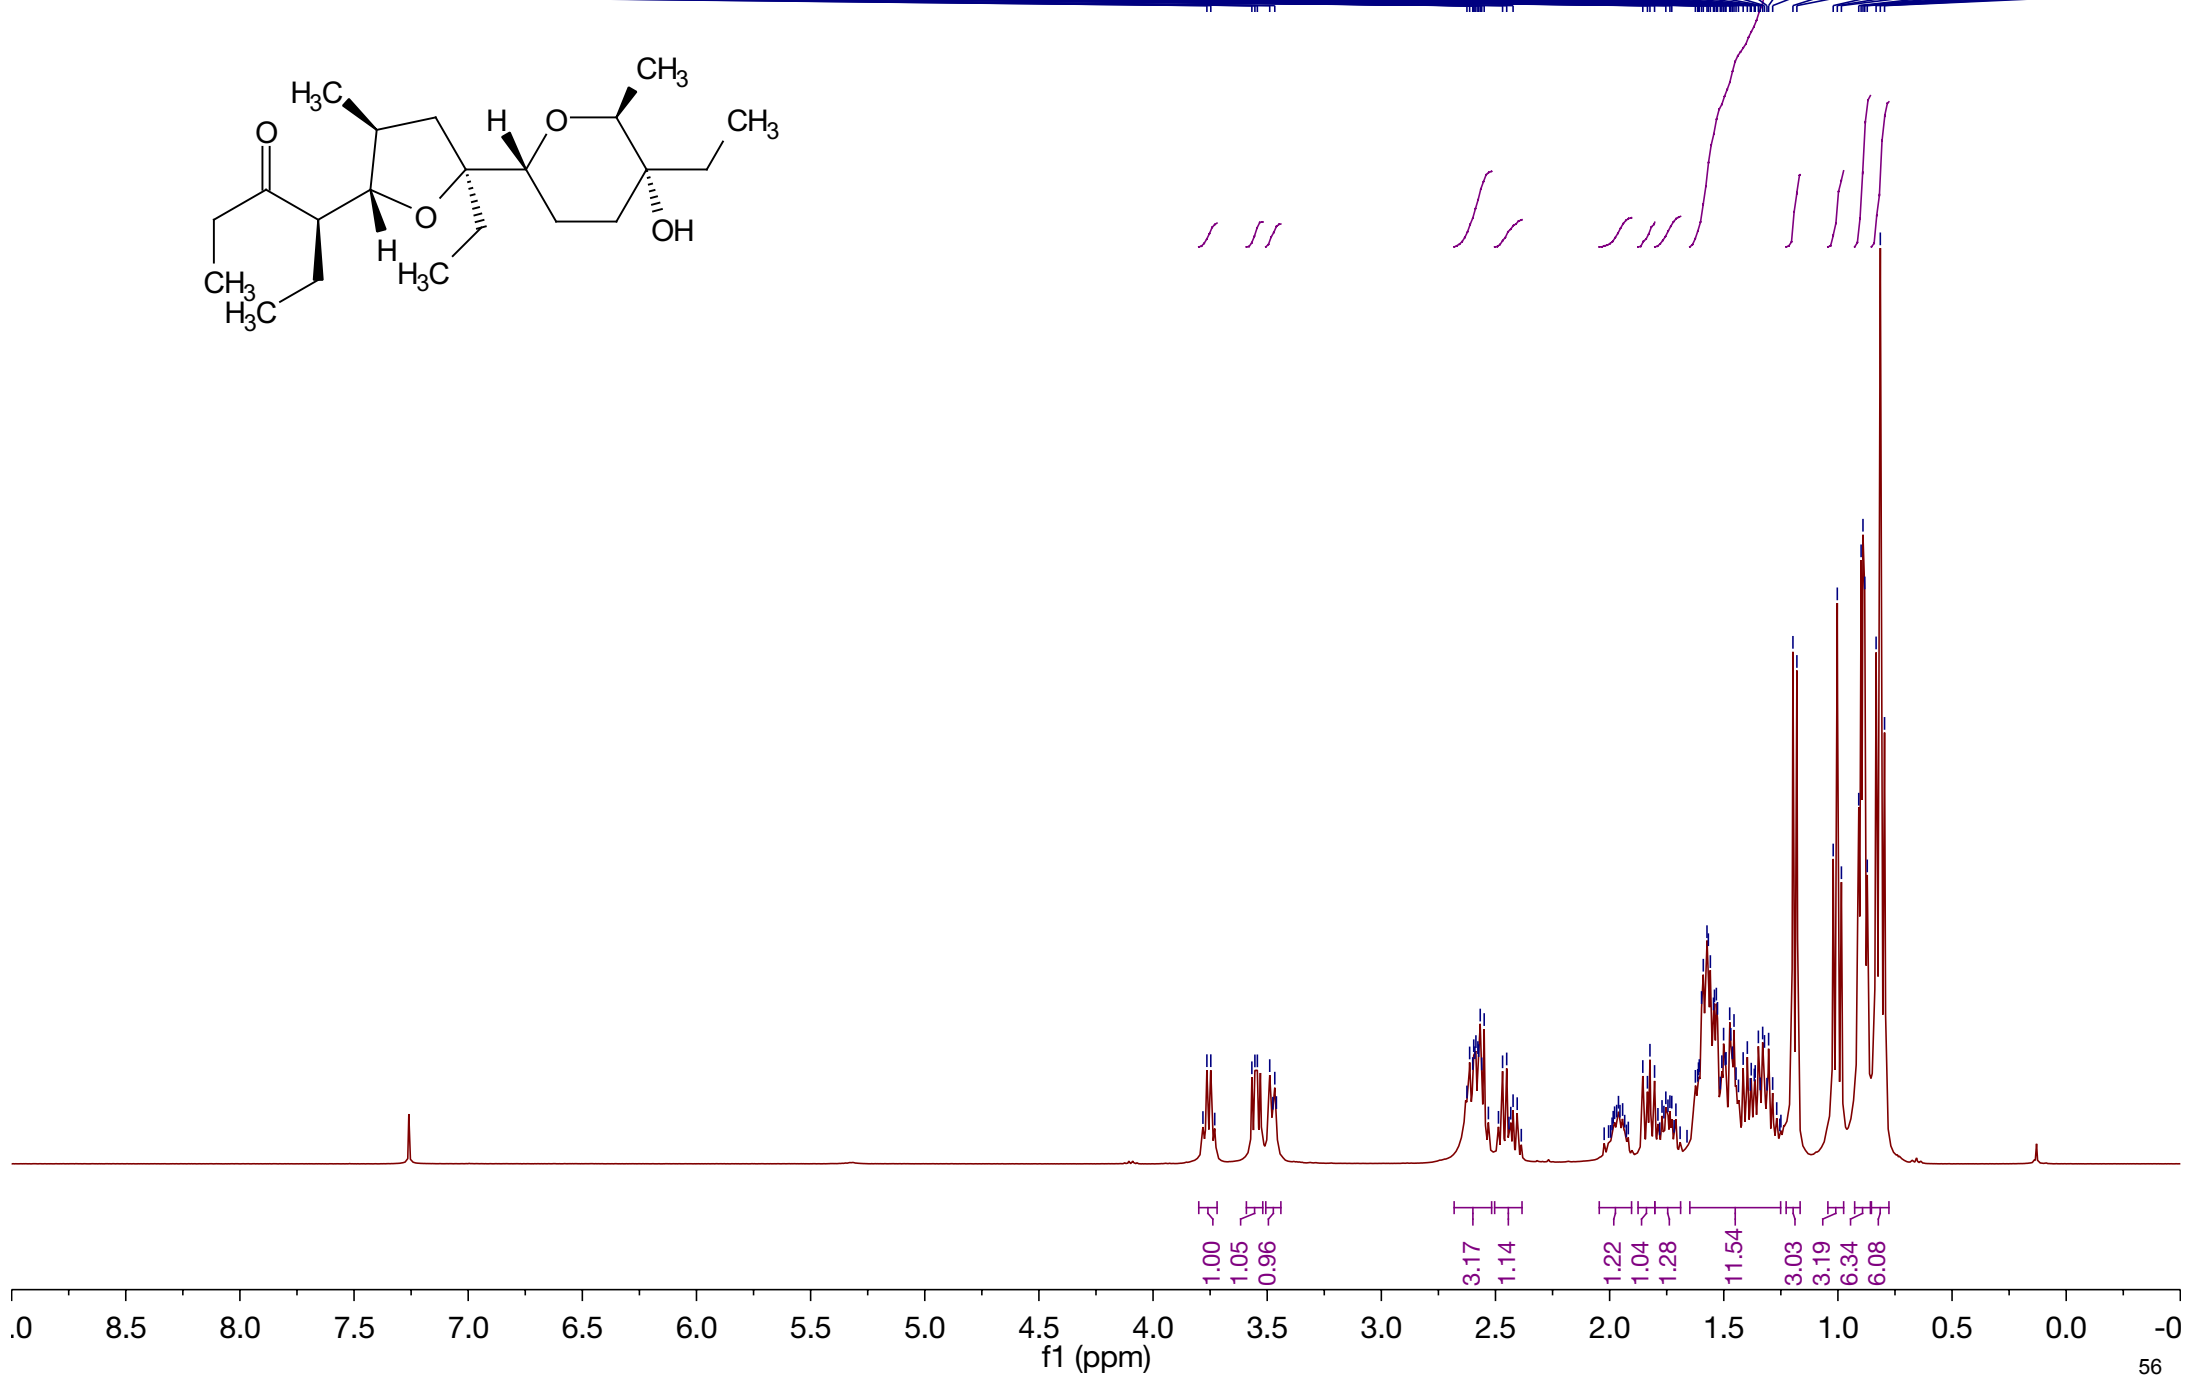



Compound 4

—214.1463

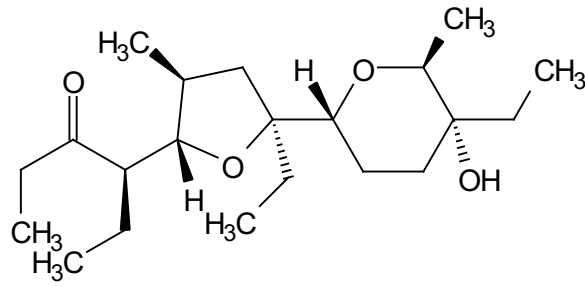

85.9790  
84.4197  
77.4780  
77.1600  
76.9802  
76.8416  
73.0083  
71.0595

—57.5702

40.8321  
37.3610  
37.0394  
30.4575  
29.3856  
28.6525  
21.3692  
21.2420  
16.8021  
14.2465  
12.5901  
8.1714  
7.5124  
6.5505

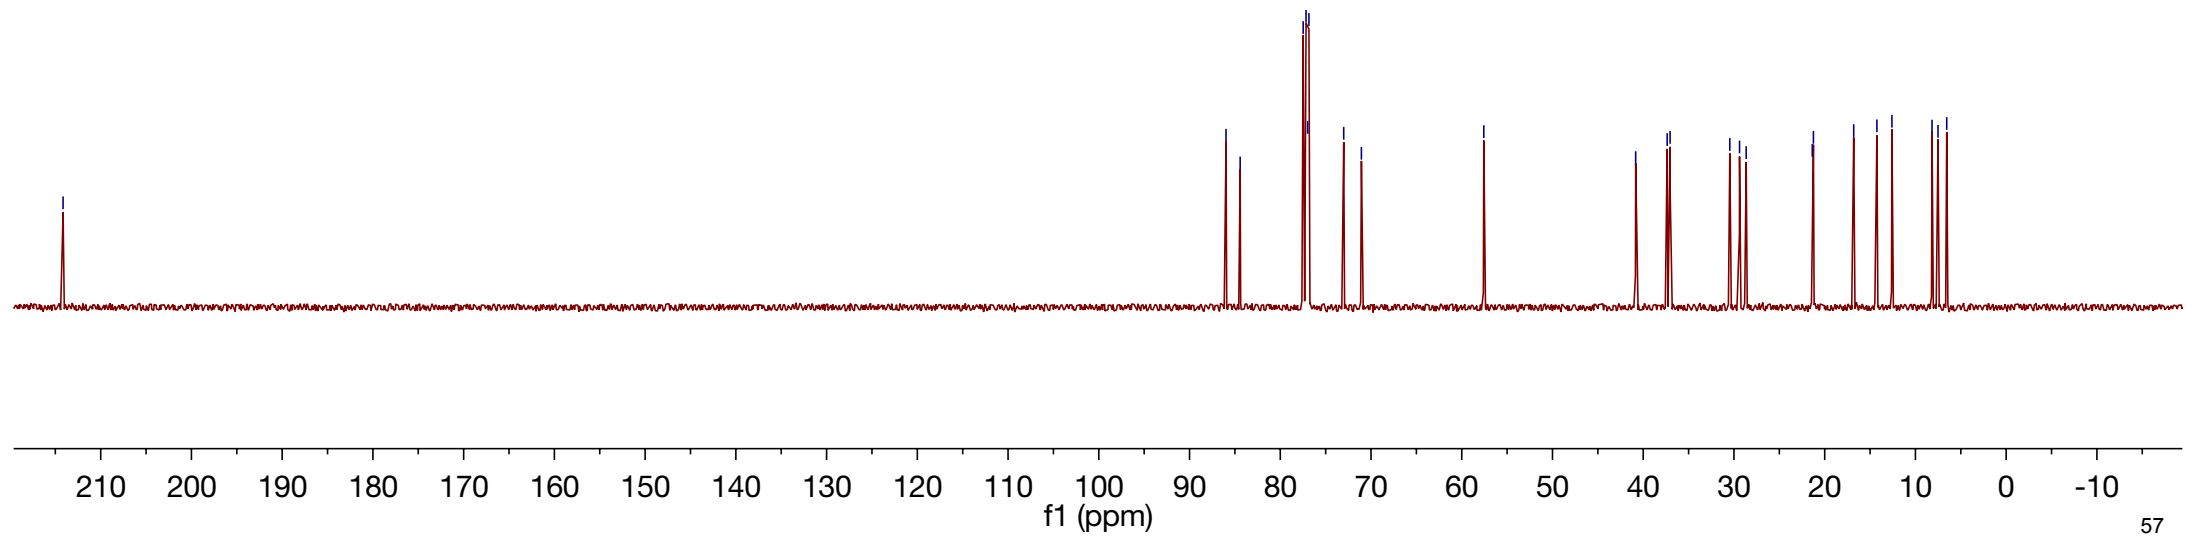

Compound 10

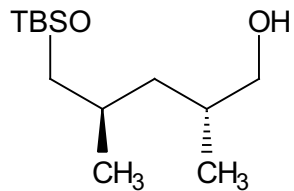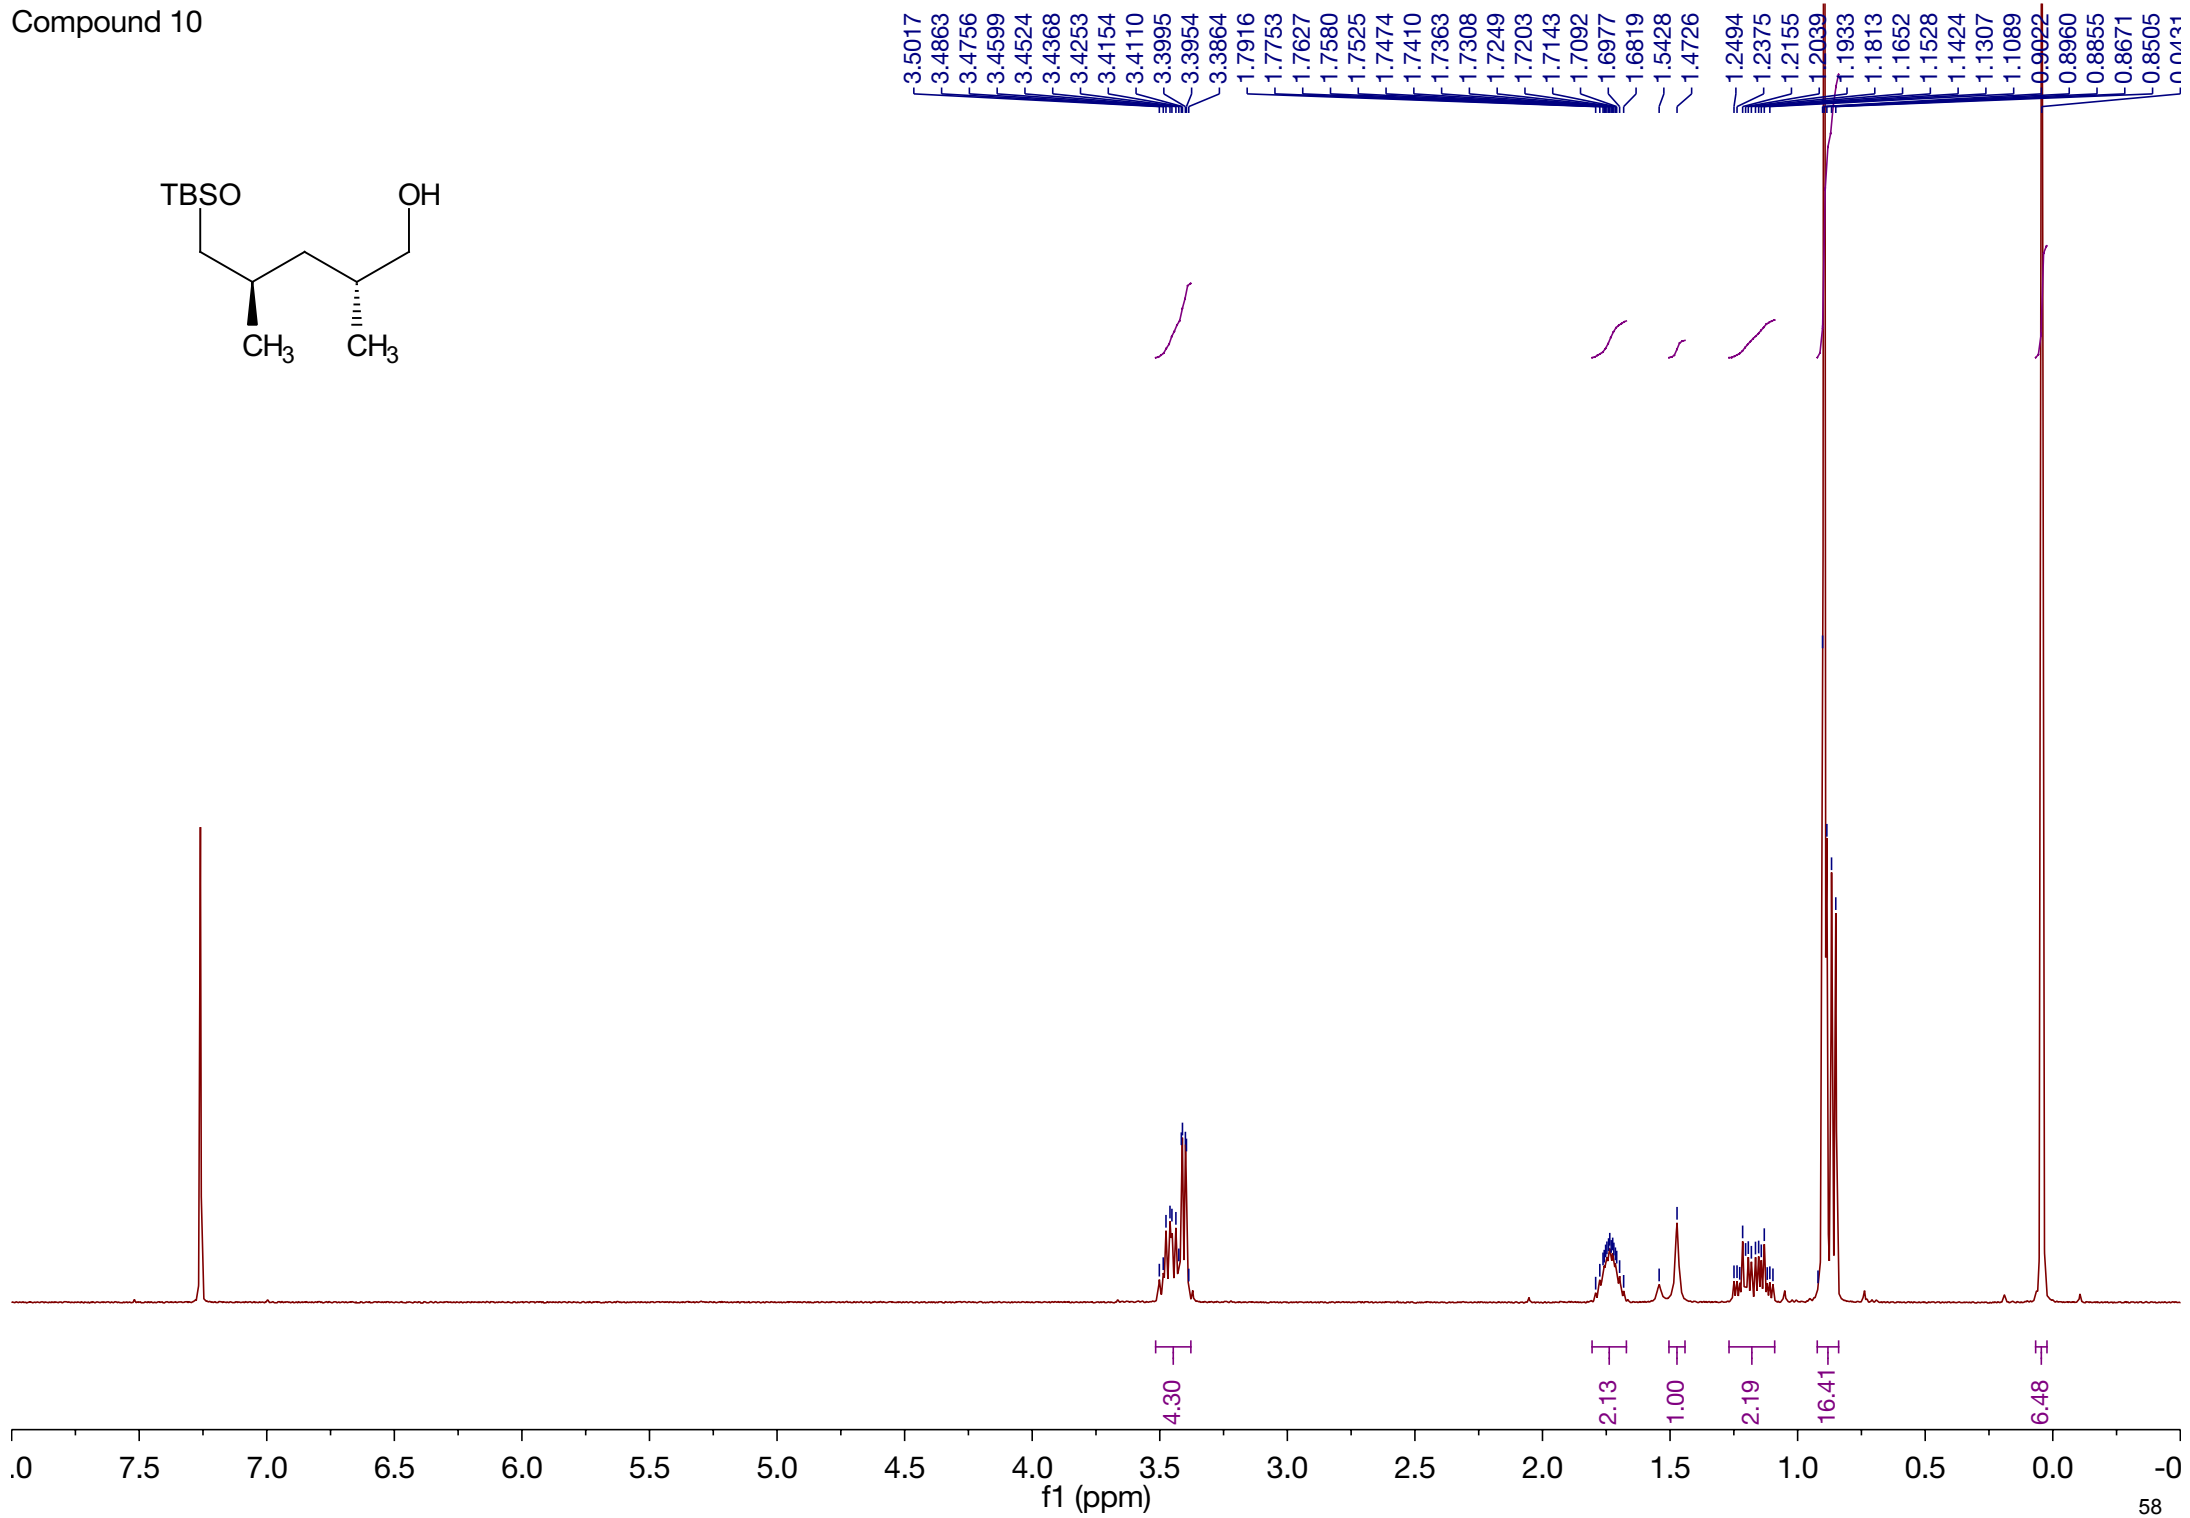

Compound 10

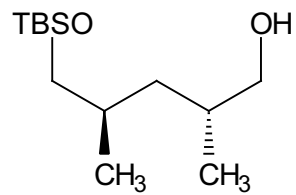

77.4779  
77.1604  
76.8429  
69.1760  
69.1416  
36.9753  
33.2353  
33.0867  
26.1006  
18.5076  
16.7764  
16.5982  
-5.2078

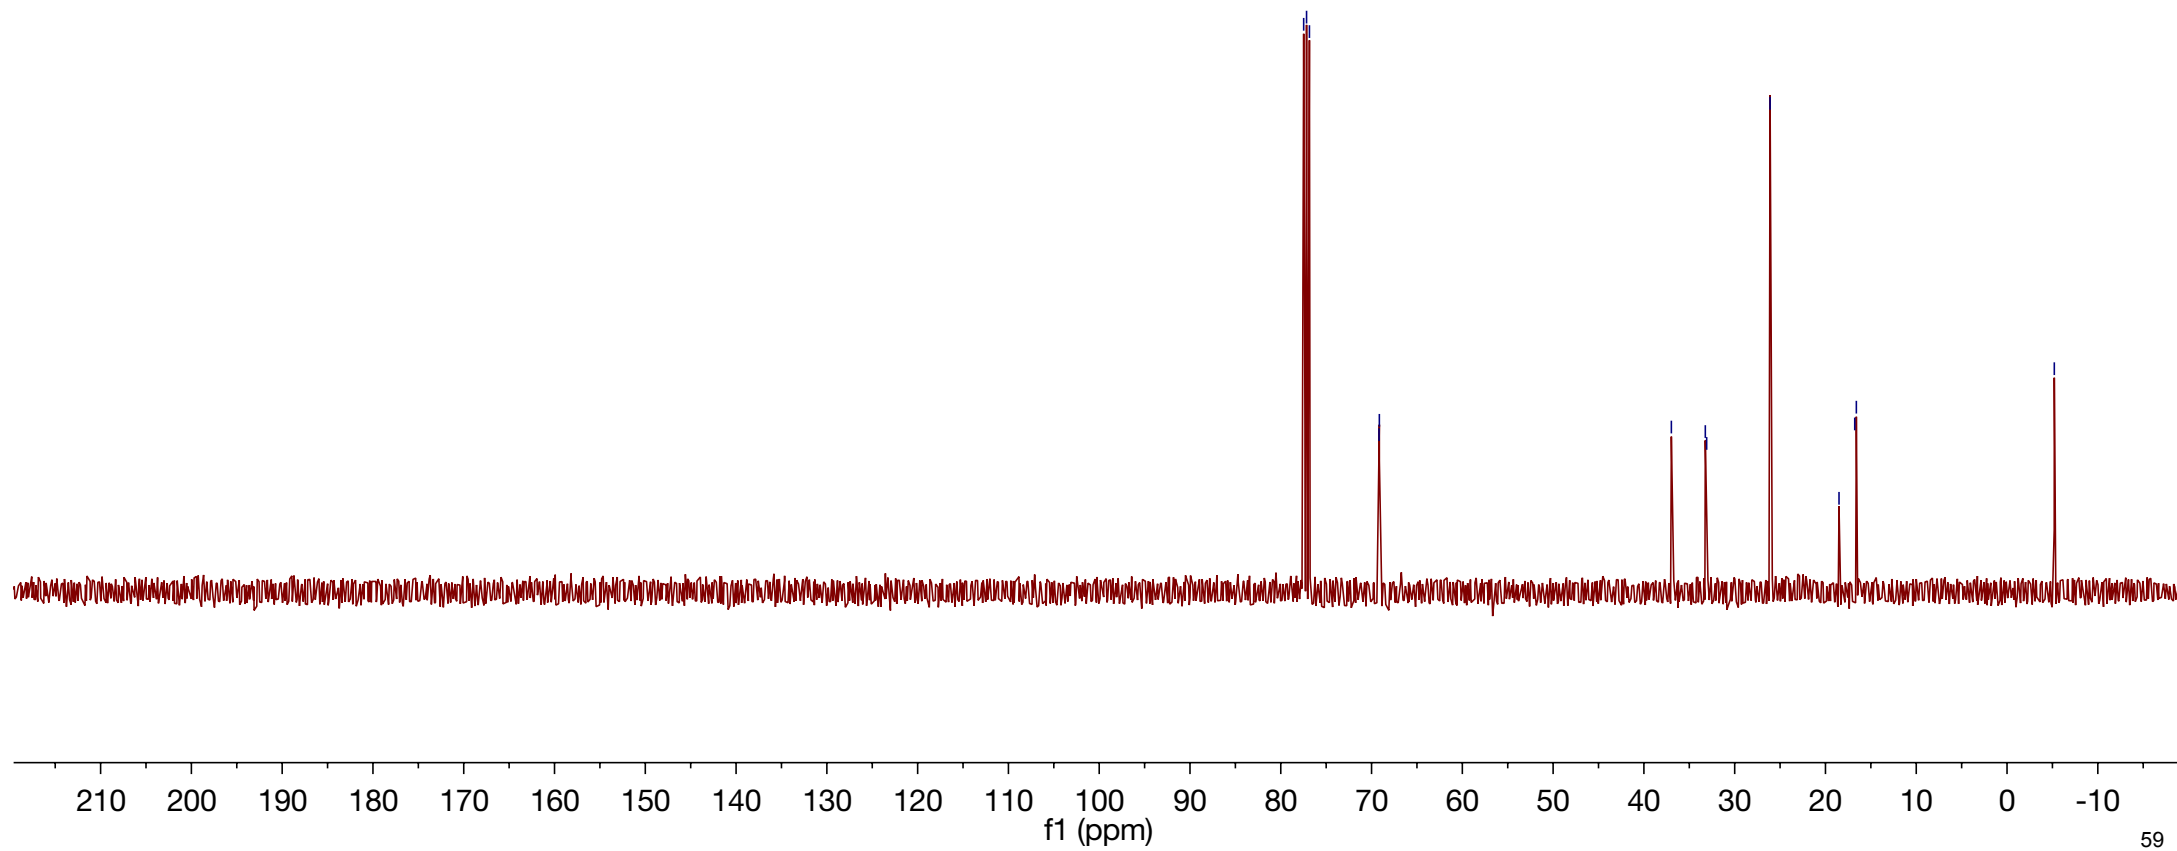

Compound 11

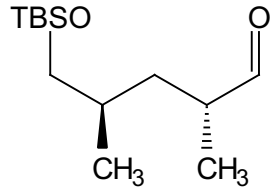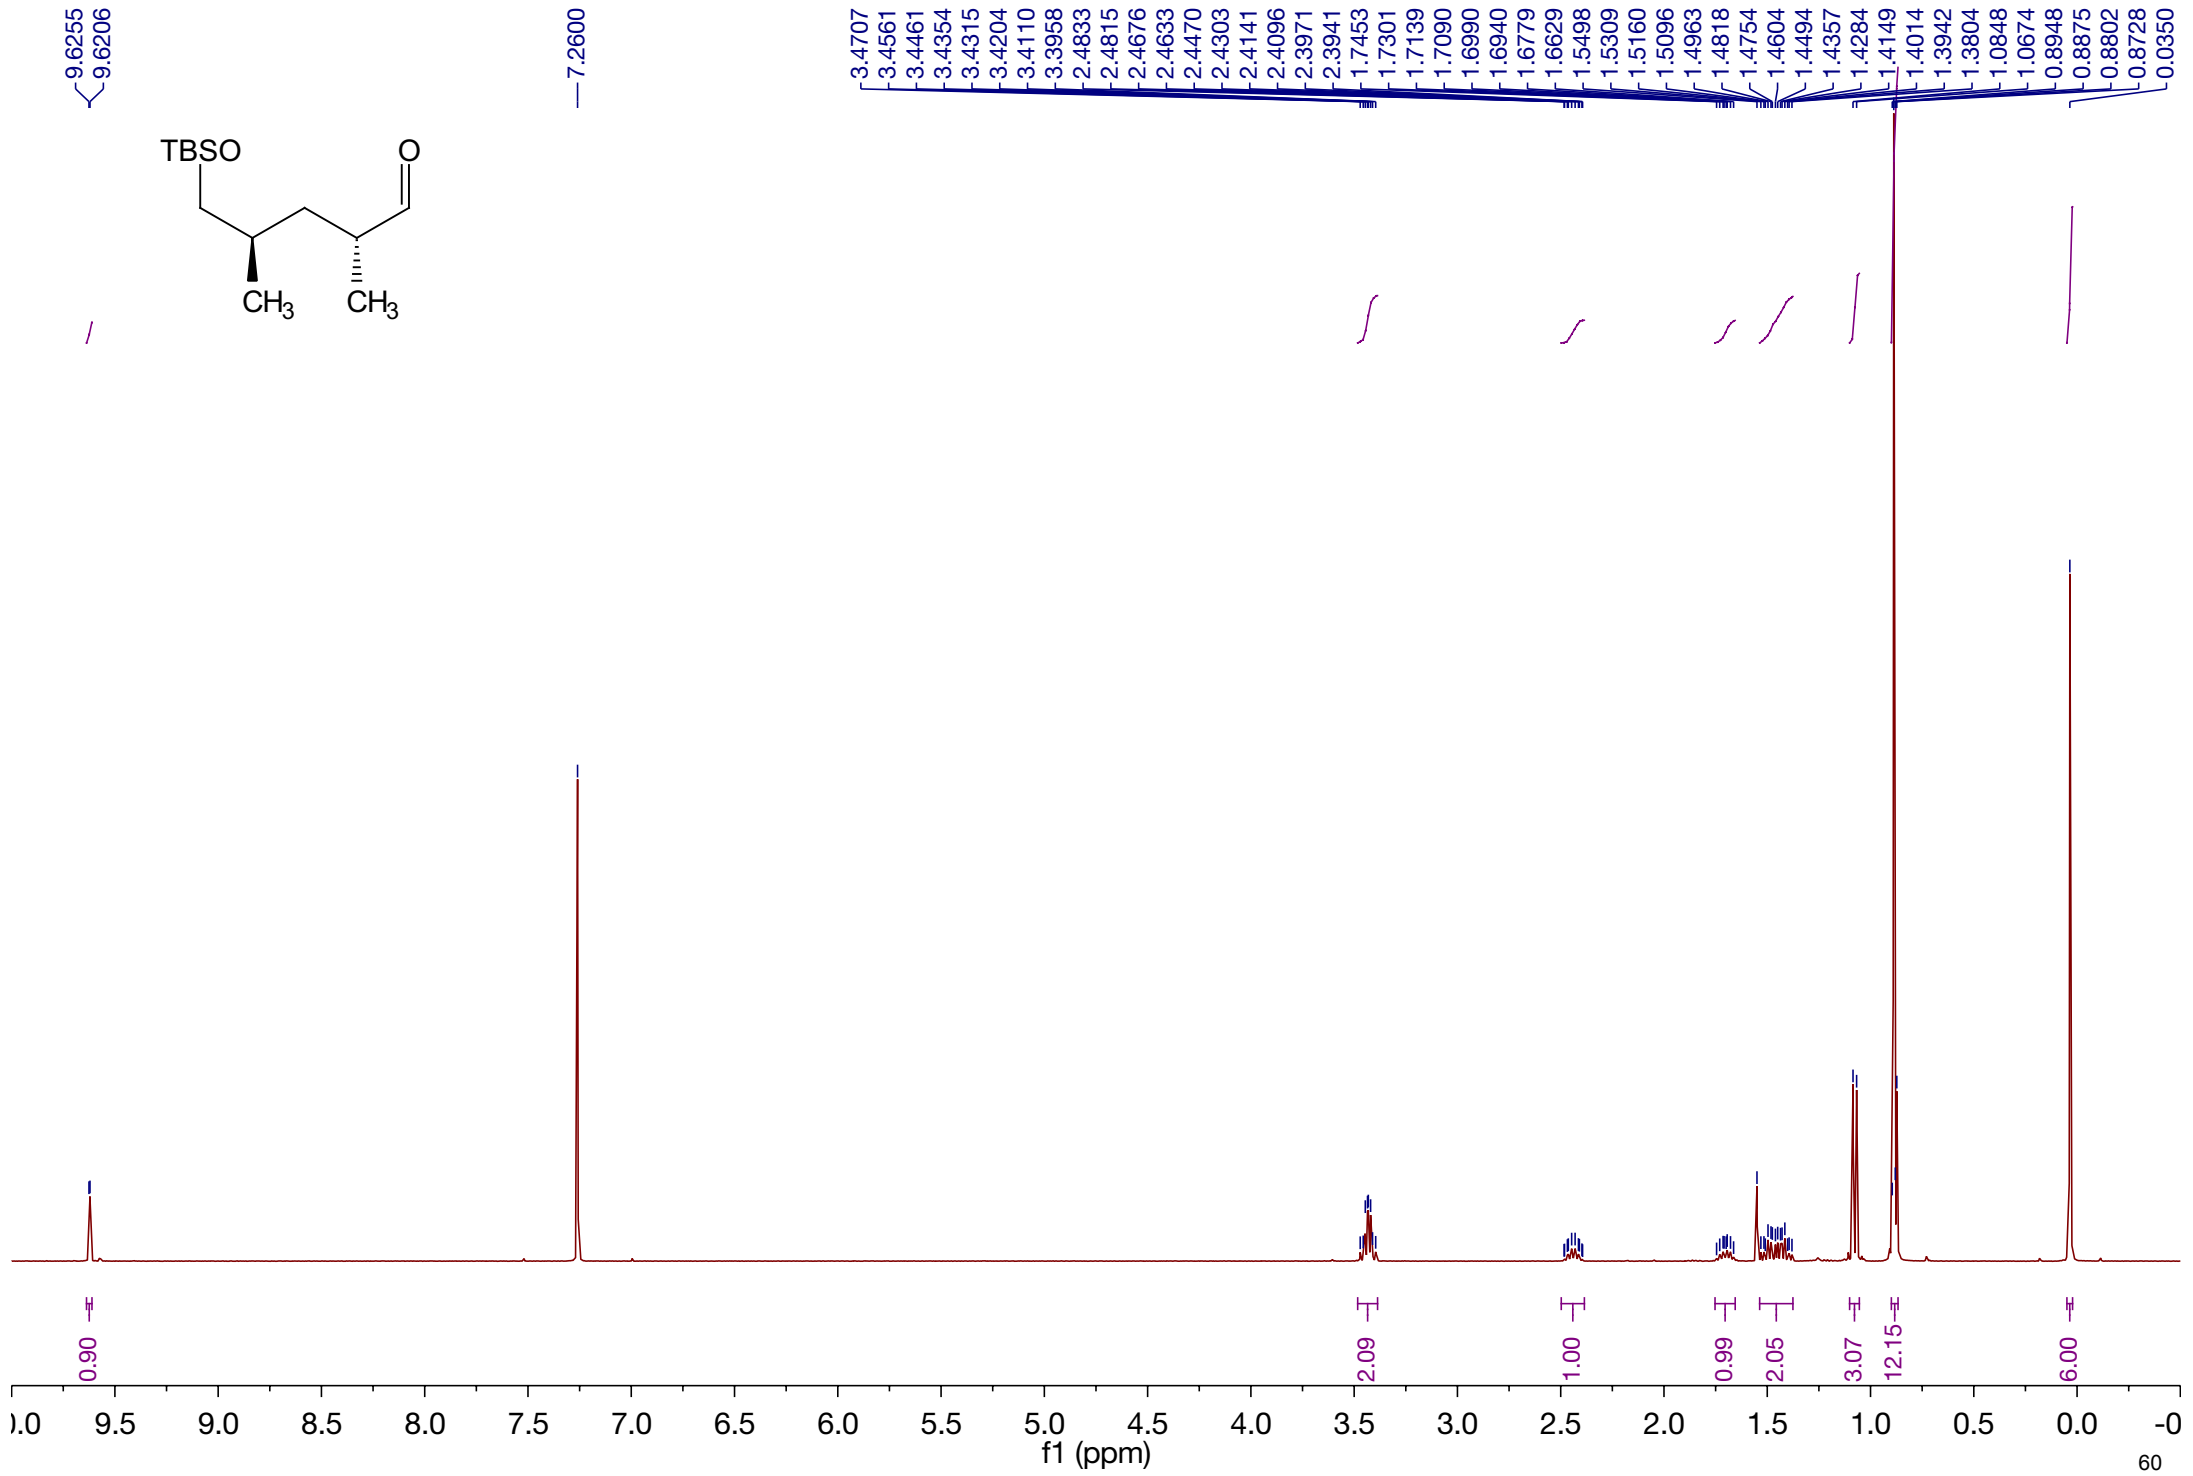

Compound 11

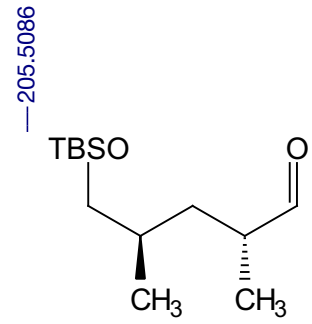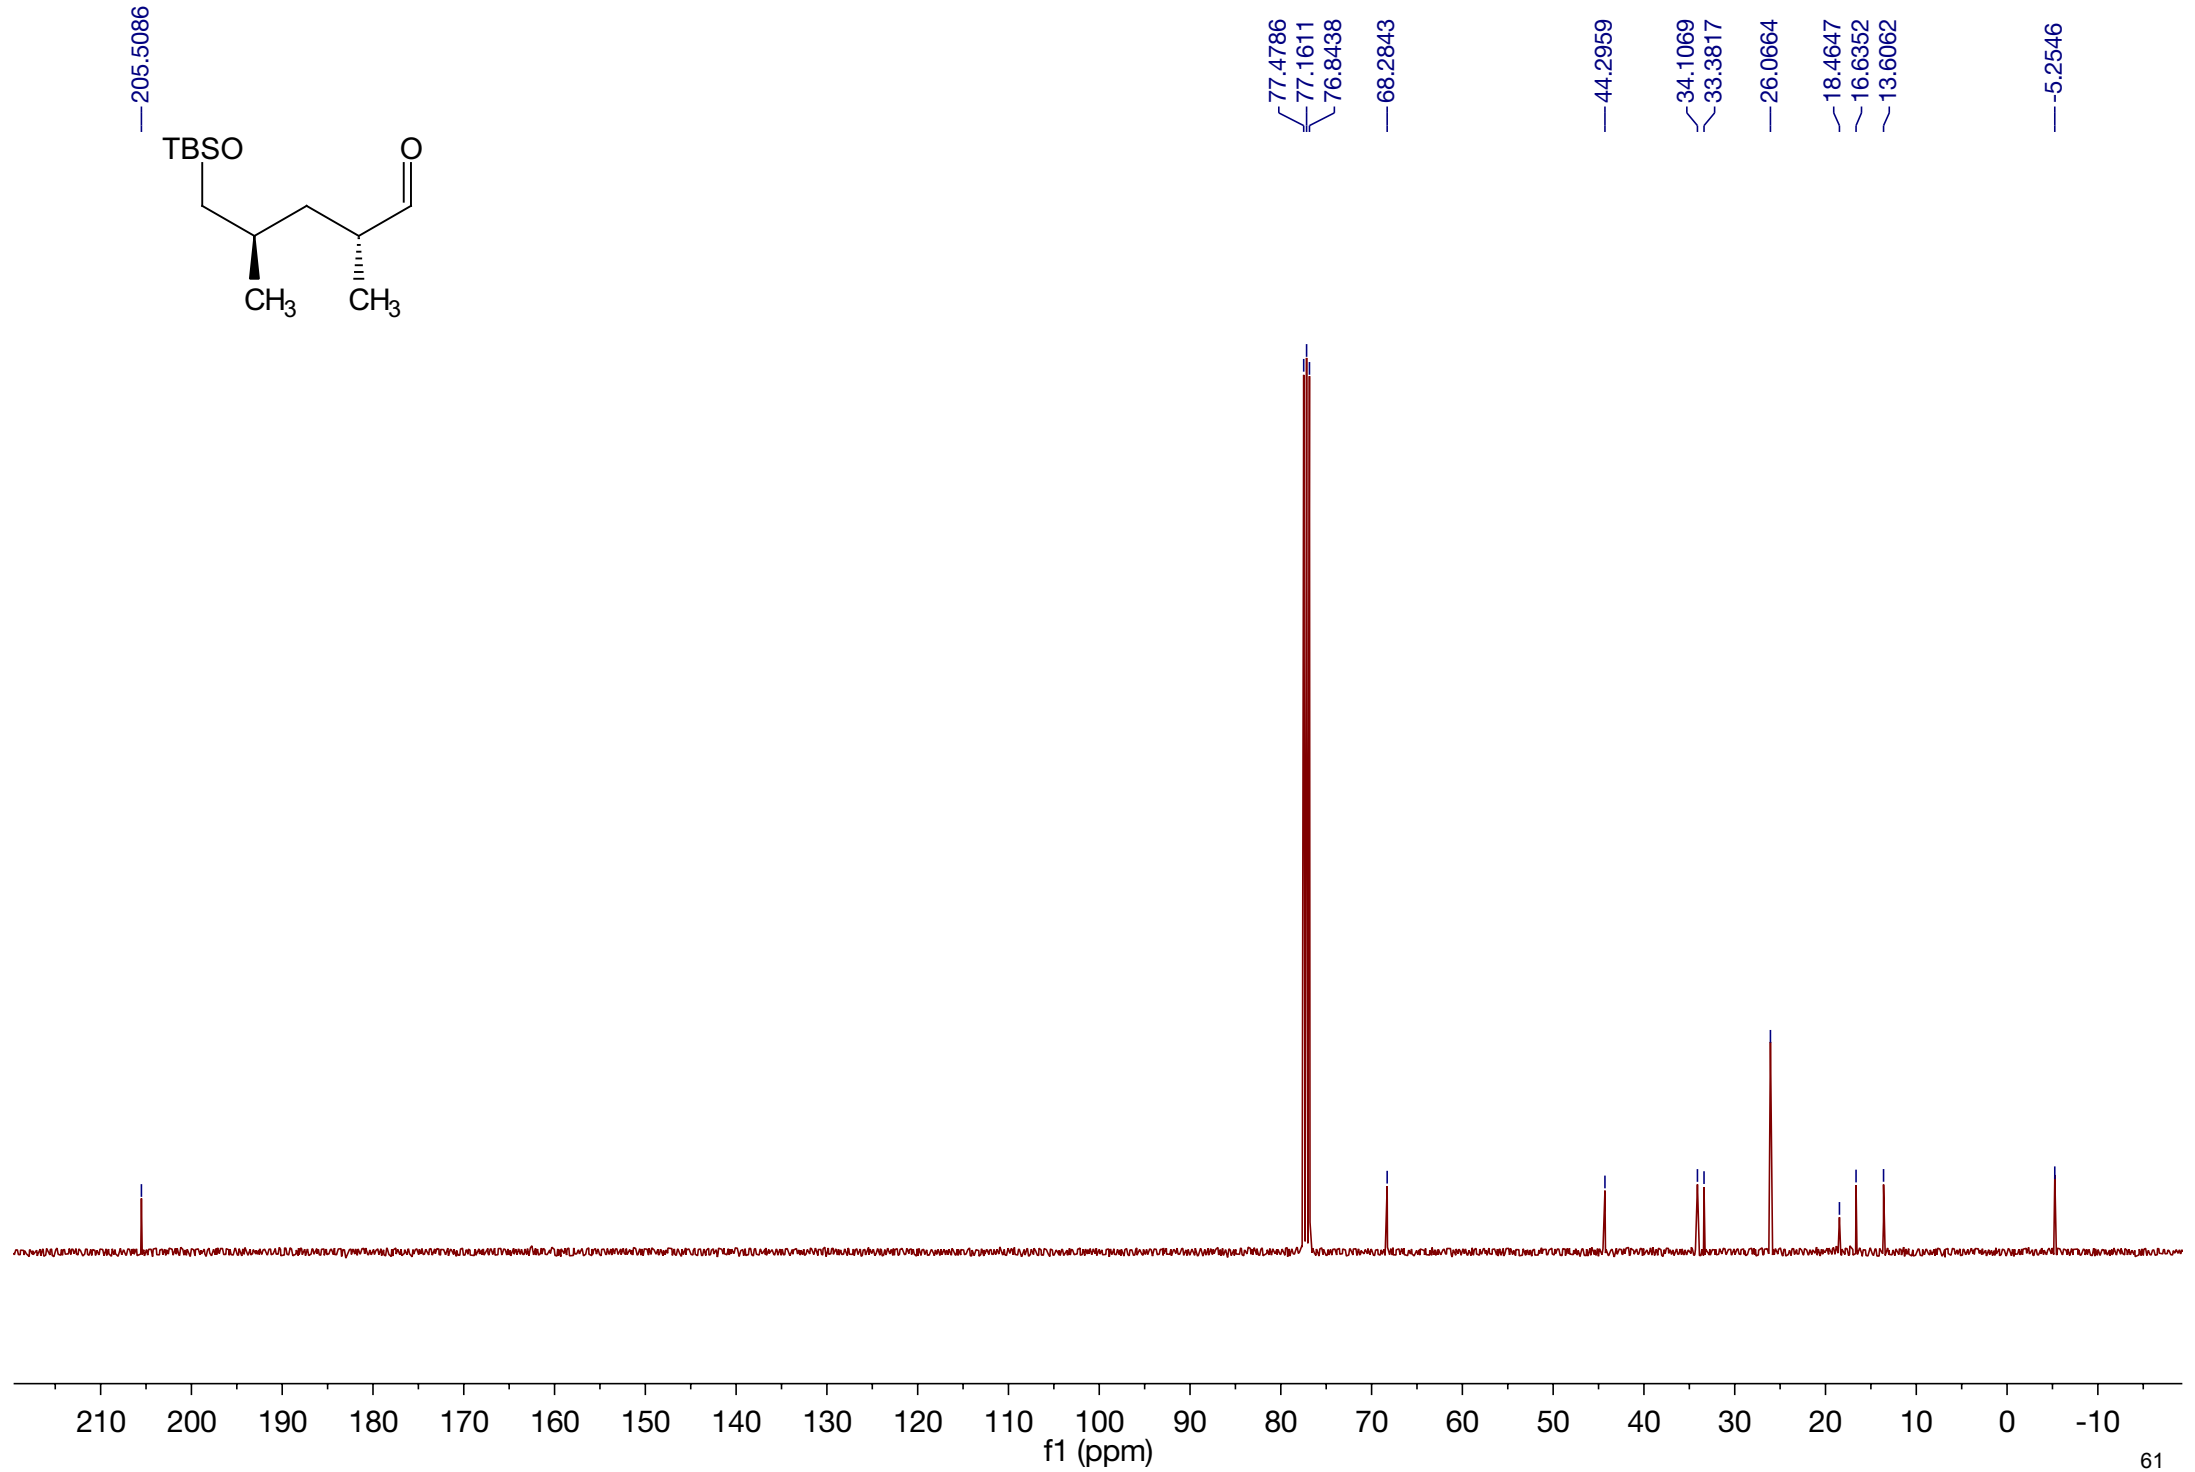

Compound 12

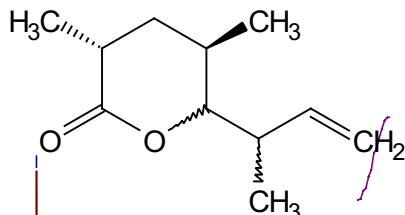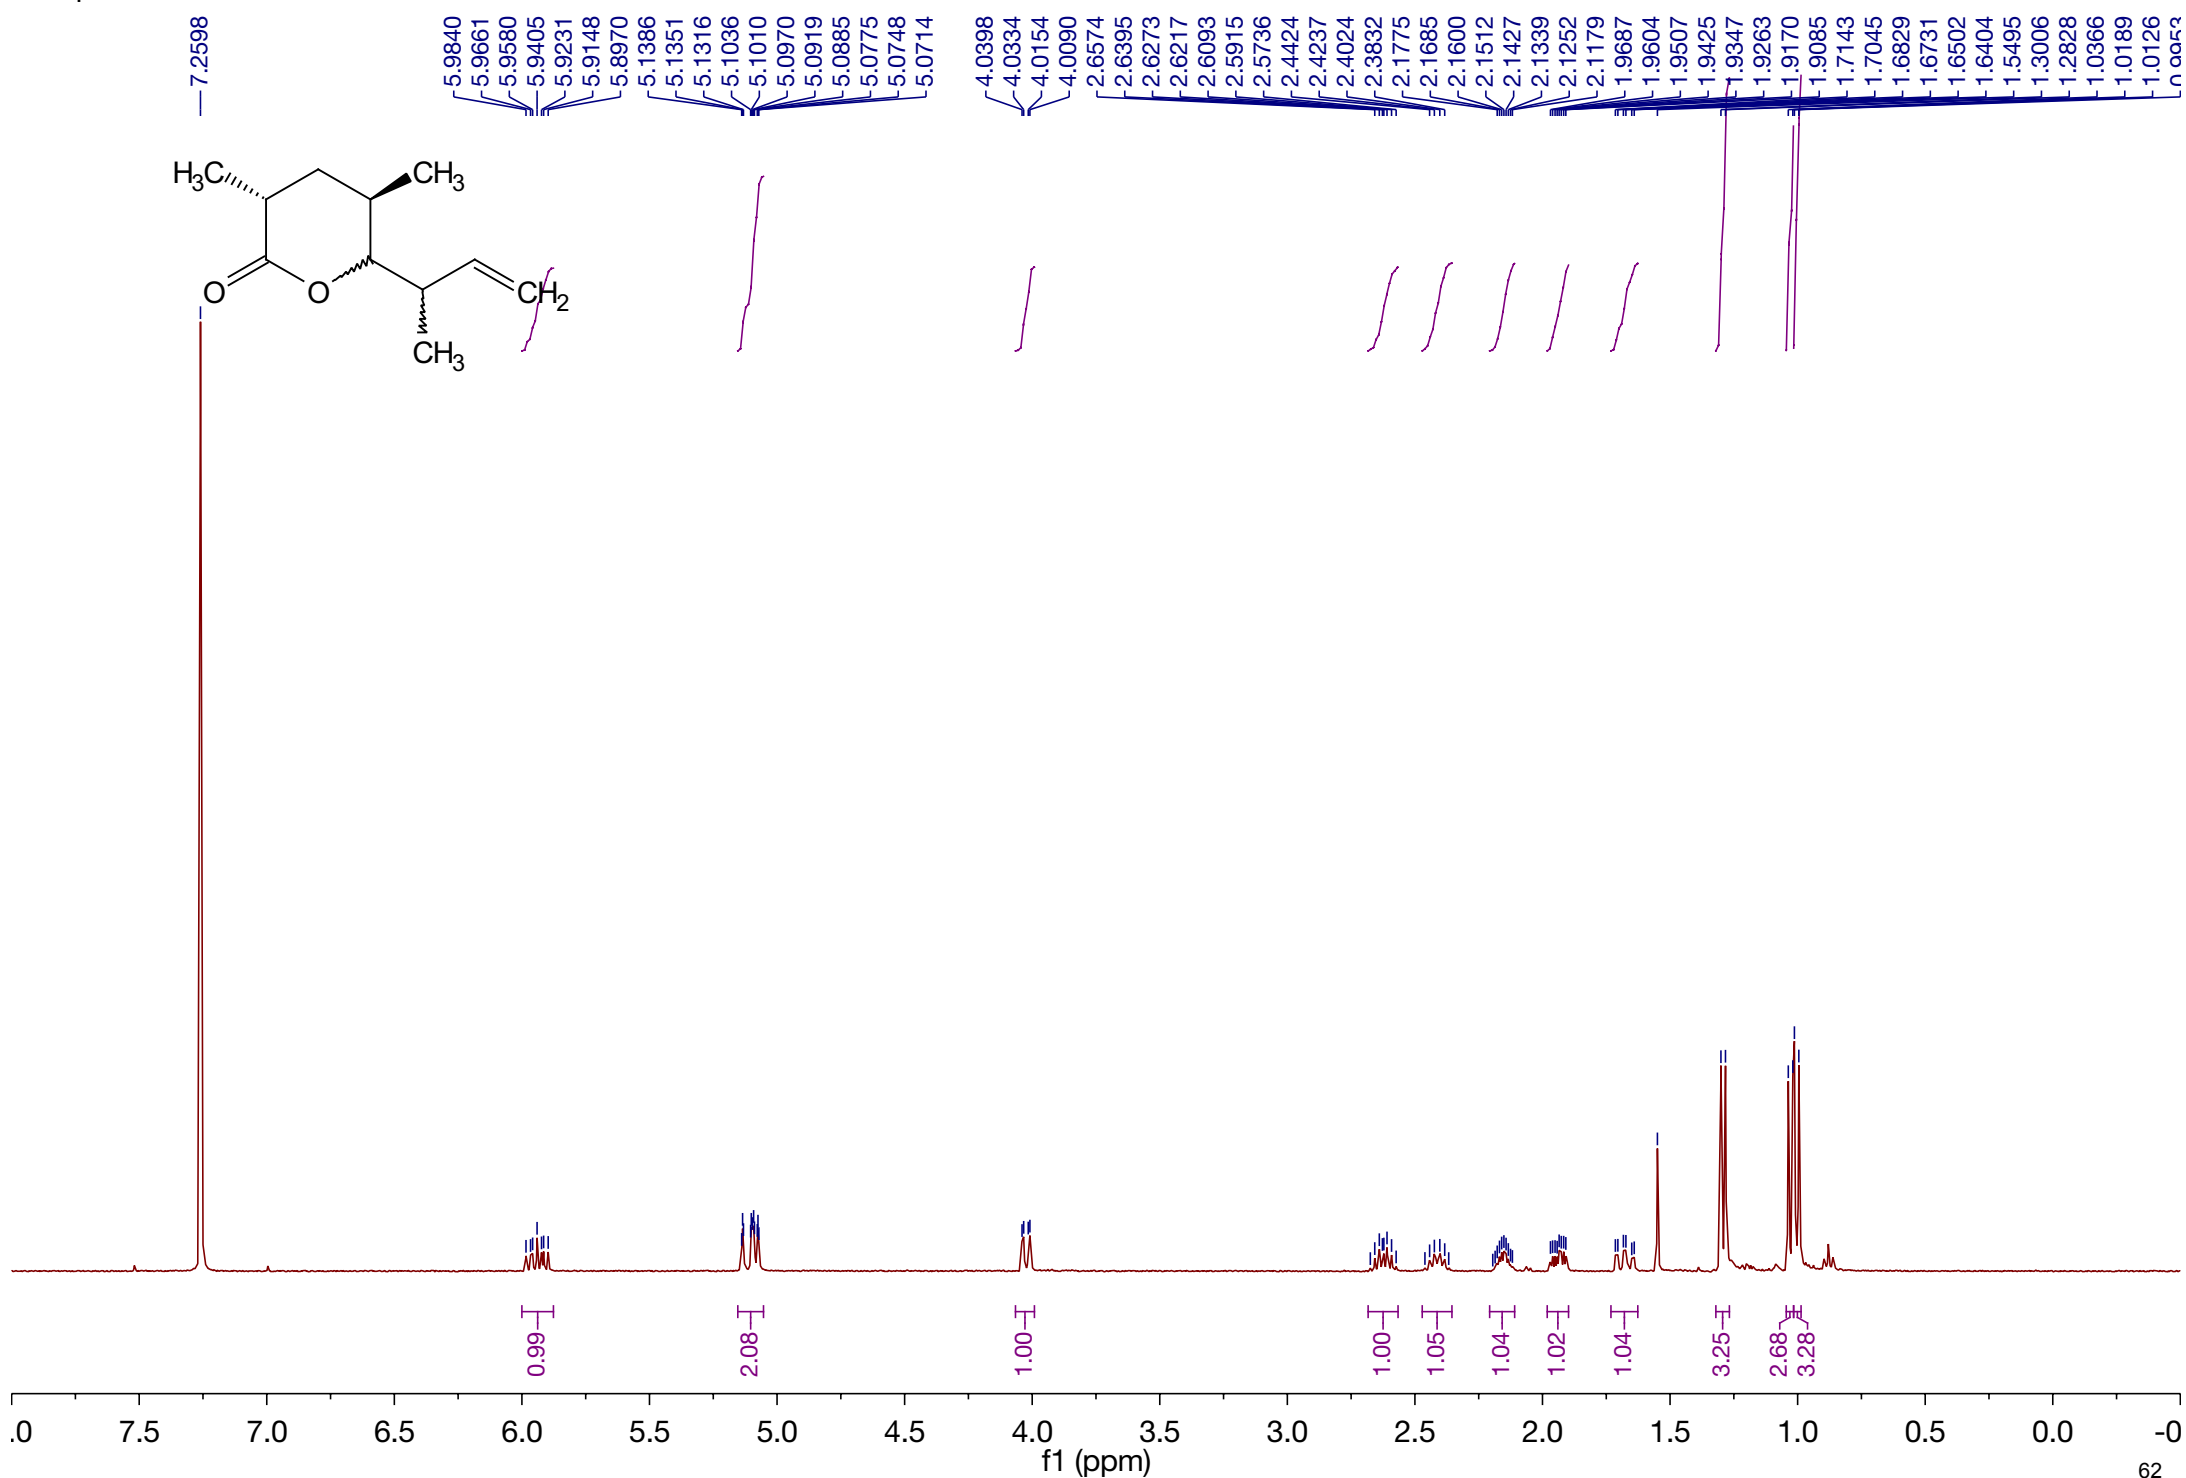

Compound 12

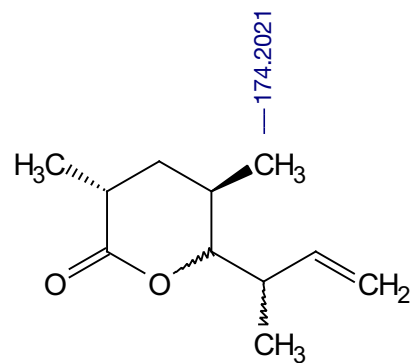

— 174.2021

— 140.3642

— 115.1480

— 87.1455

— 77.4775  
— 77.1595  
— 76.8412

— 39.5137  
— 36.4427  
— 31.2932  
— 28.0722

— 17.9847  
— 15.5138  
— 10.8444

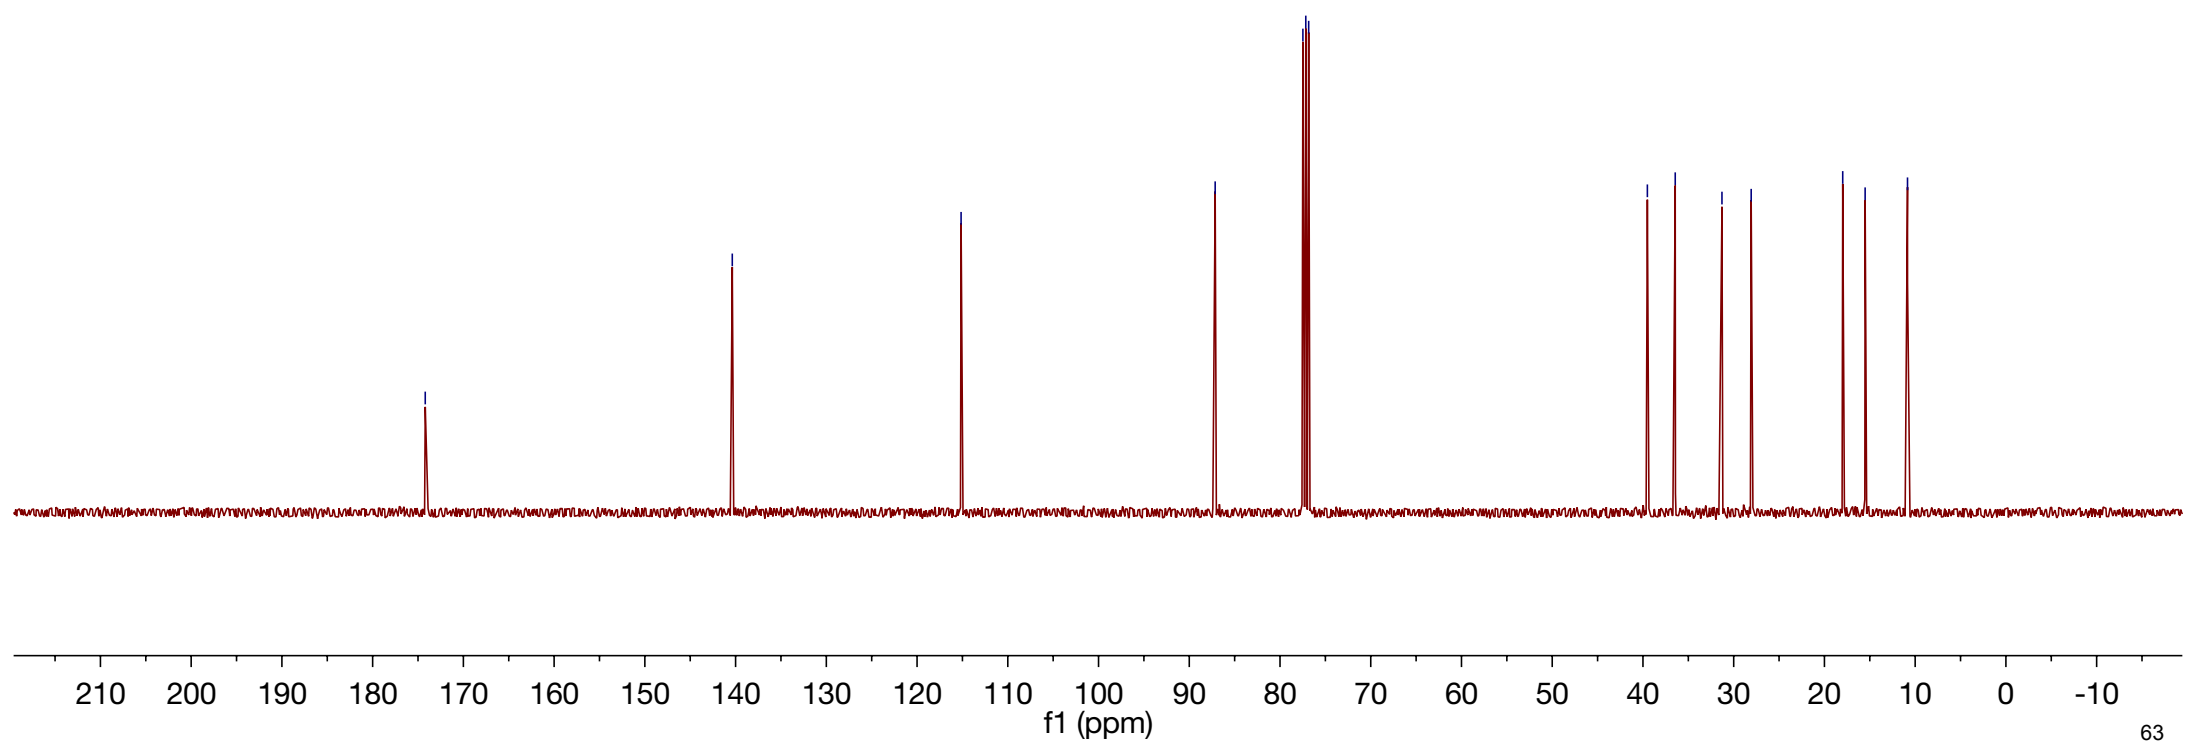

Compound 13

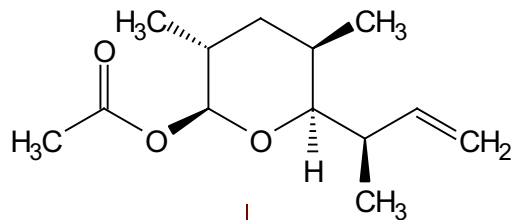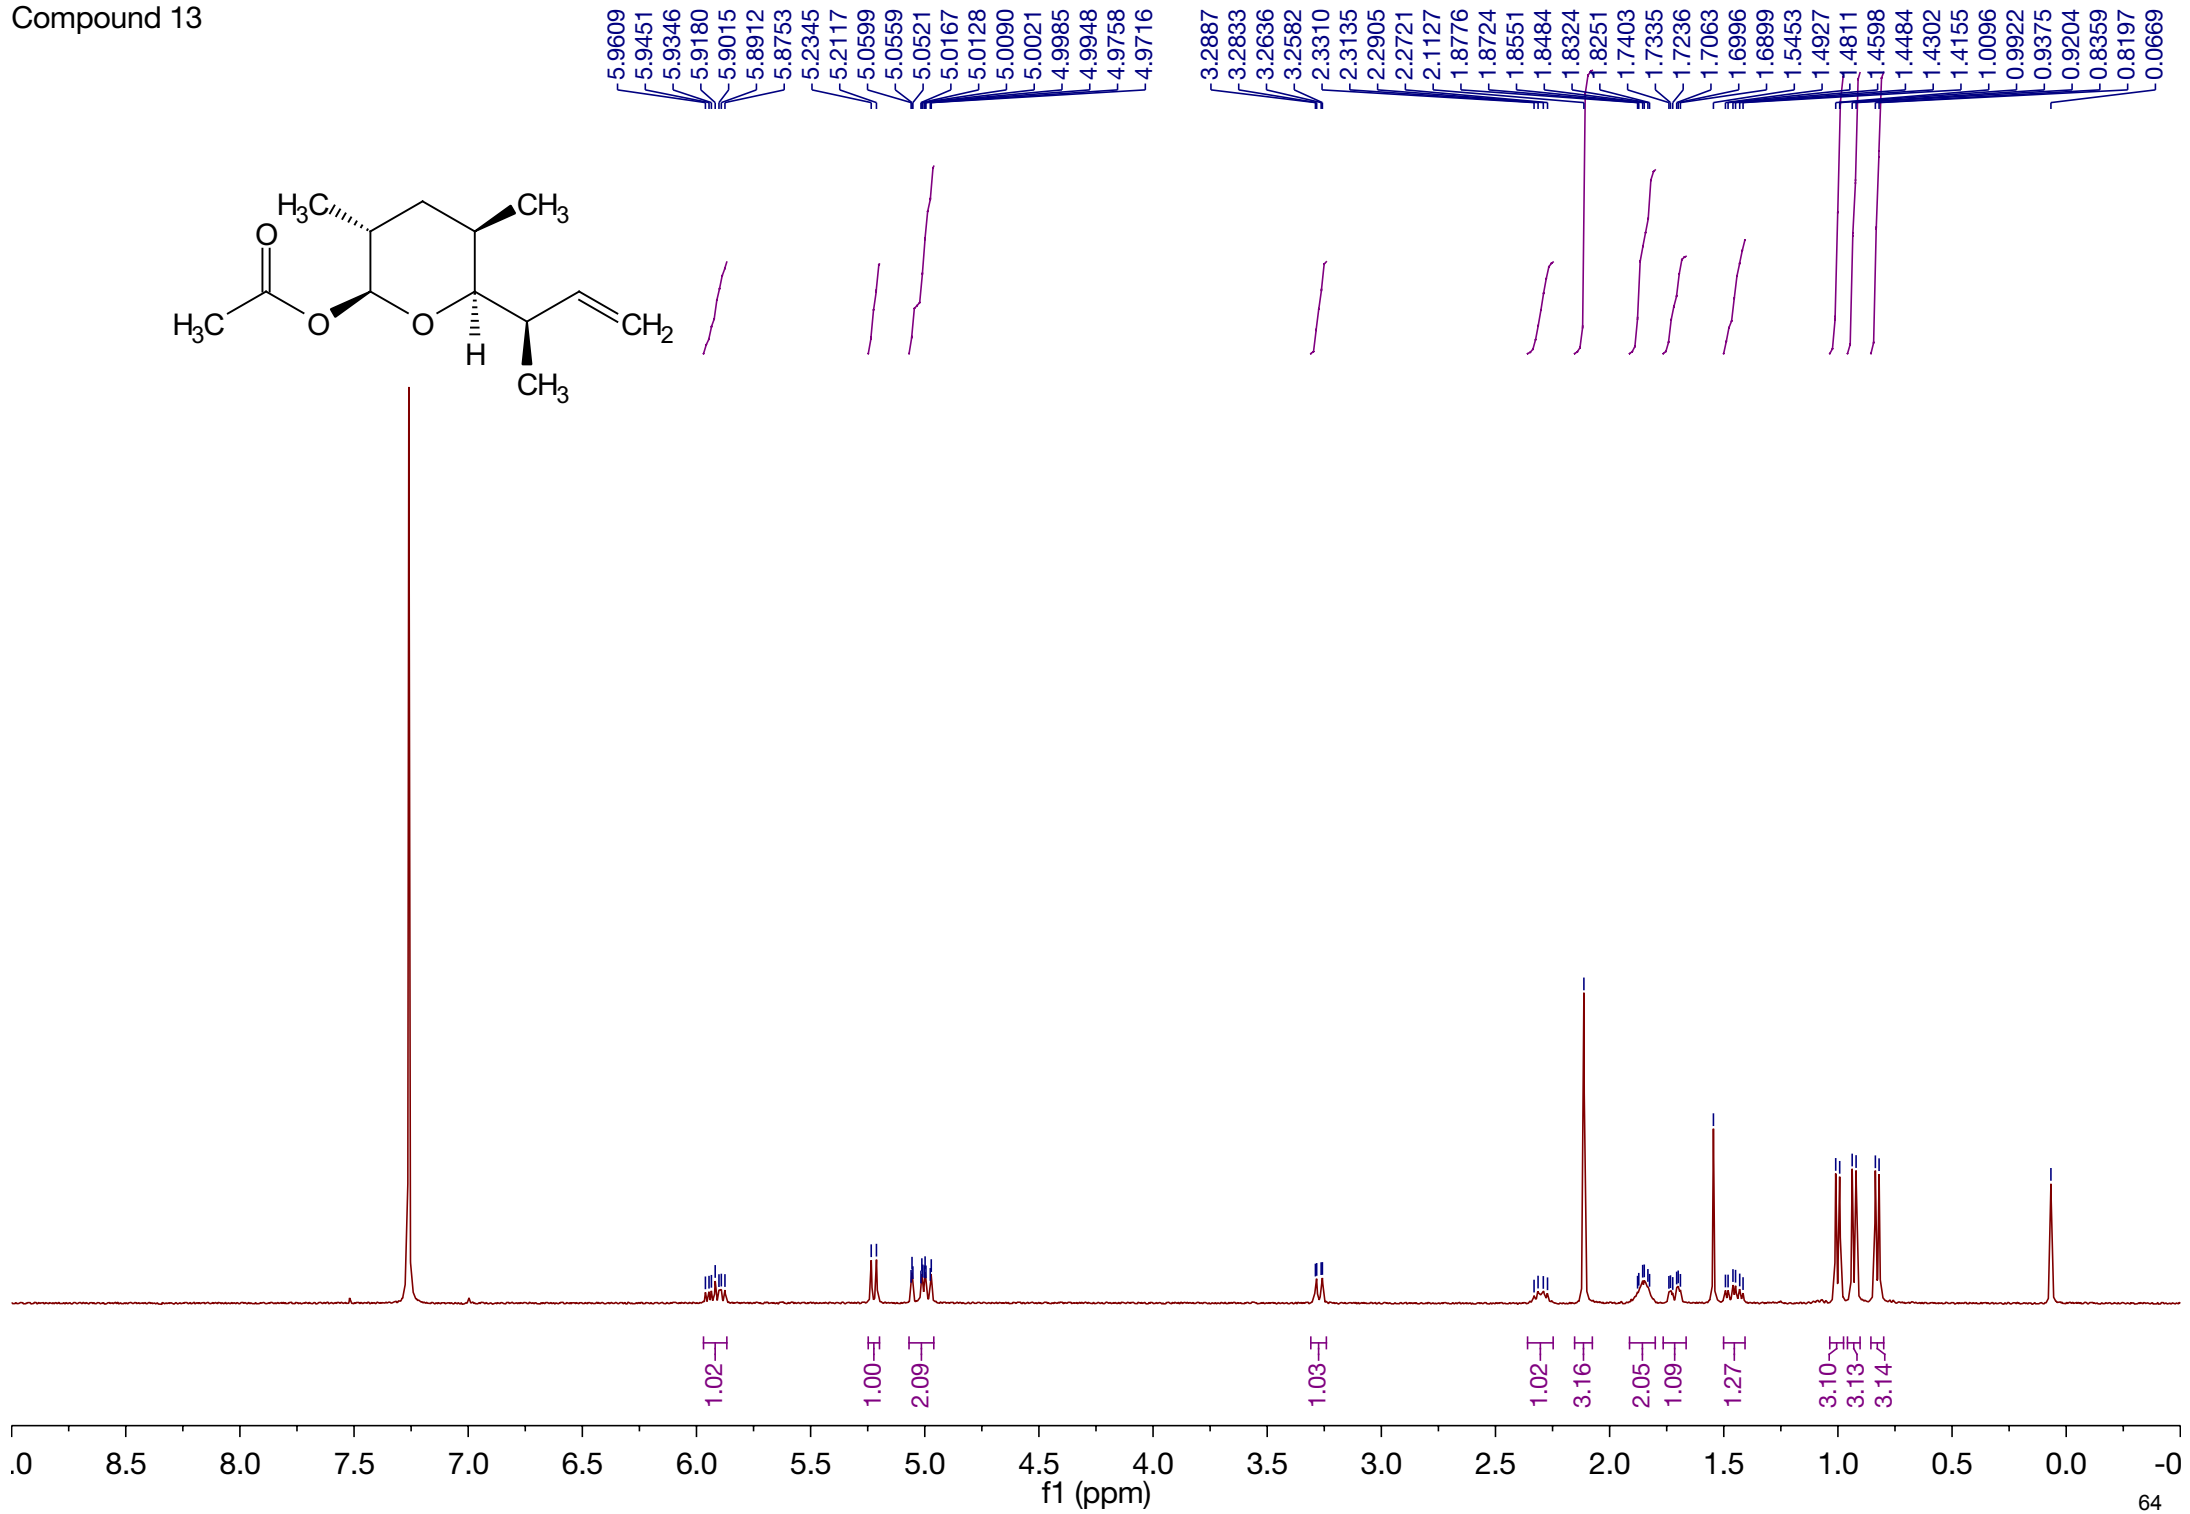



Compound 13

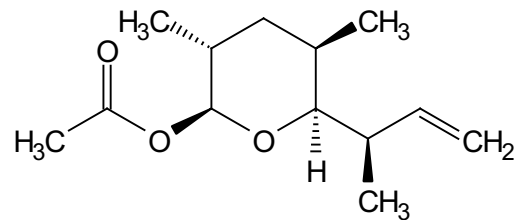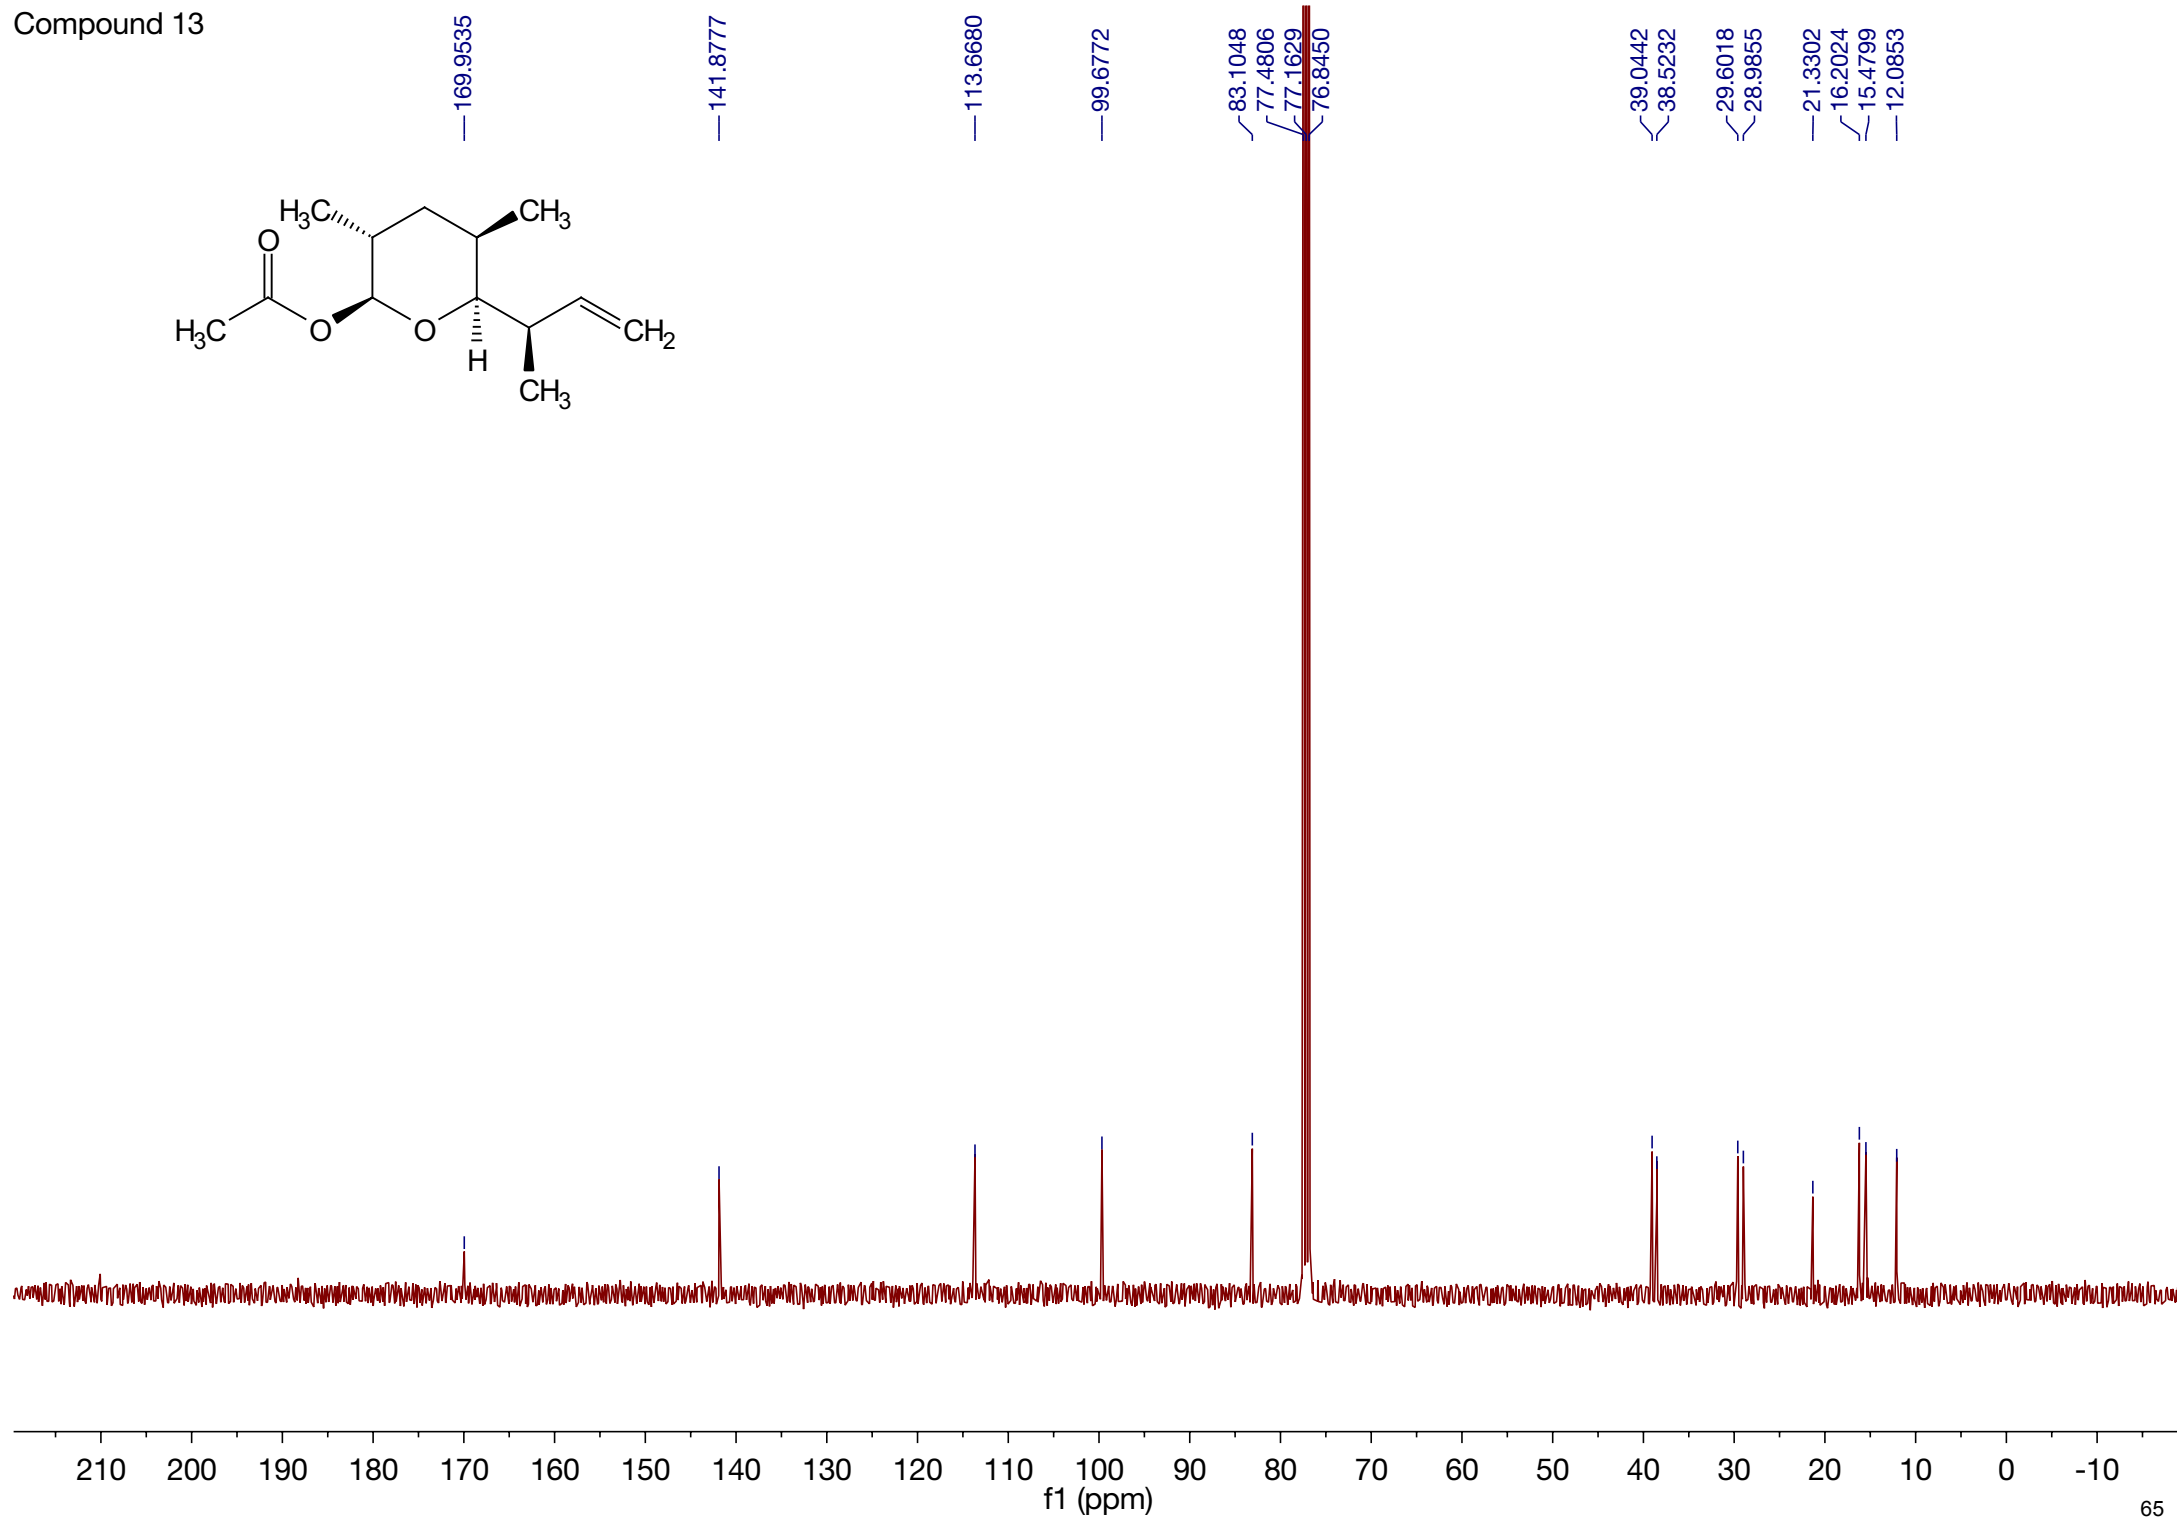

Compound 14

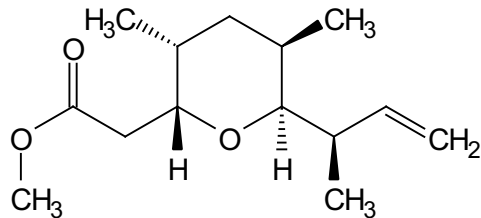

5.7691  
5.7496  
5.7432  
5.7249  
5.7066  
5.7001  
5.6807  
4.9998  
4.9956  
4.9533  
4.9312  
4.9195  
4.9149  
4.9076  
4.8936  
4.8890  
4.3785  
4.3657  
4.3512  
4.3367  
4.3242  
3.6808  
3.3196  
3.3134  
3.2951  
3.2888  
2.8222  
2.7935  
2.7865  
2.7579  
2.3192  
2.3080  
2.2834  
2.2723  
2.2494  
2.2348  
2.2188  
2.2041  
2.1867  
2.1678  
2.1470  
2.1270  
1.8999  
1.8893  
1.8735  
1.8661  
1.8569  
1.8506  
1.8375  
1.5632  
1.5522  
1.5427  
1.5299  
1.5188  
1.4978  
1.4870  
1.4730  
1.4635  
1.4546  
1.4395  
1.4309  
1.4210  
0.9867  
0.9691  
0.9086  
0.8915  
0.7600  
0.7427

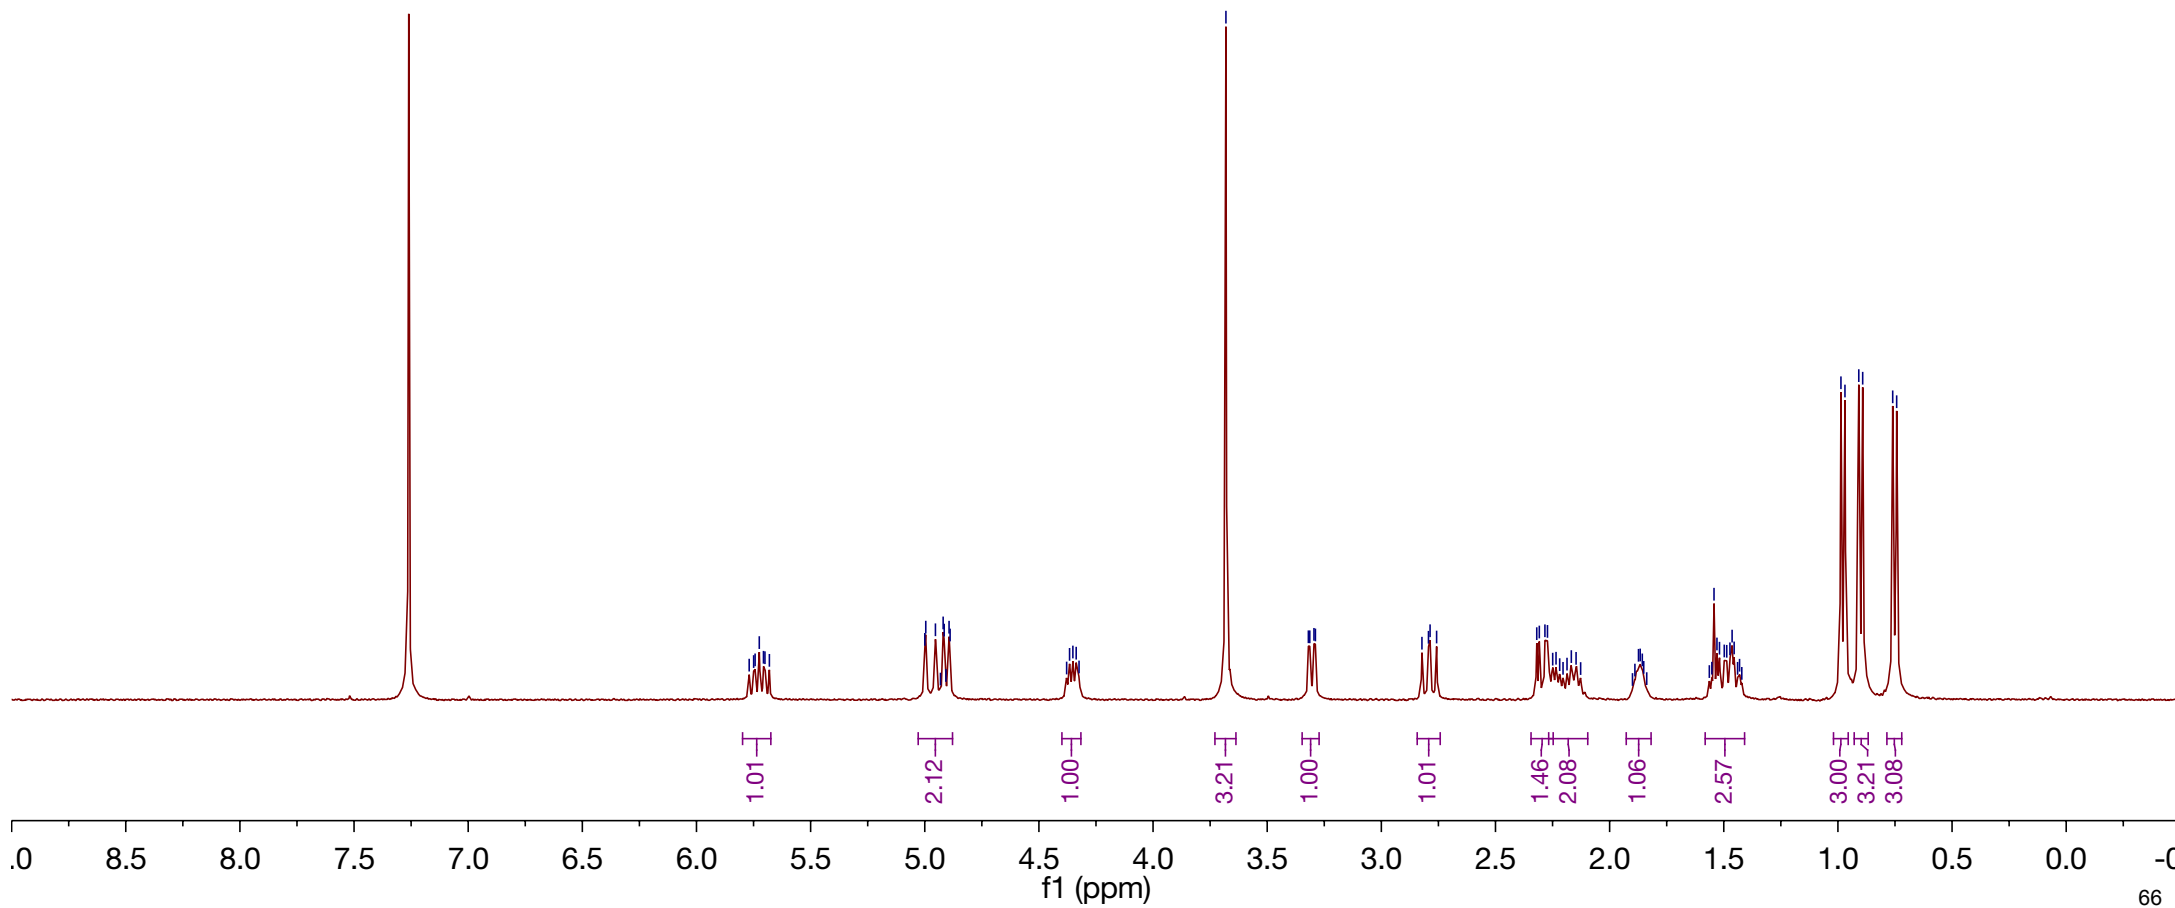

Compound 14

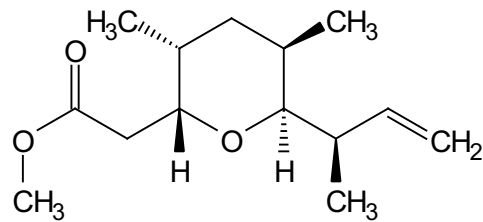

—172.4625

—143.3232

—113.1055

77.4776

77.1604

76.8422

75.1439

74.9580

—51.7955

~39.9454

~34.9390

~31.9034

~29.0077

~26.8324

~17.5850

~16.1116

~11.8257

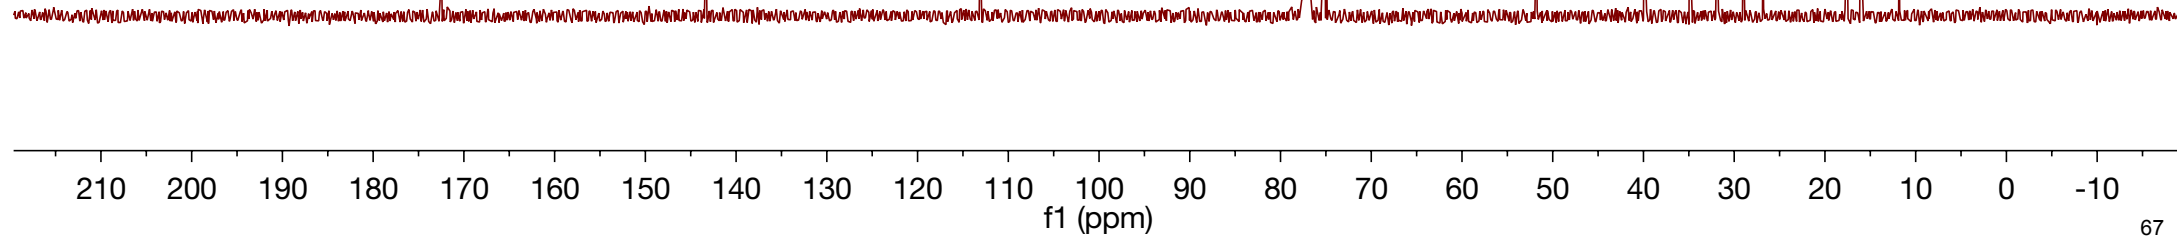

Compound 7

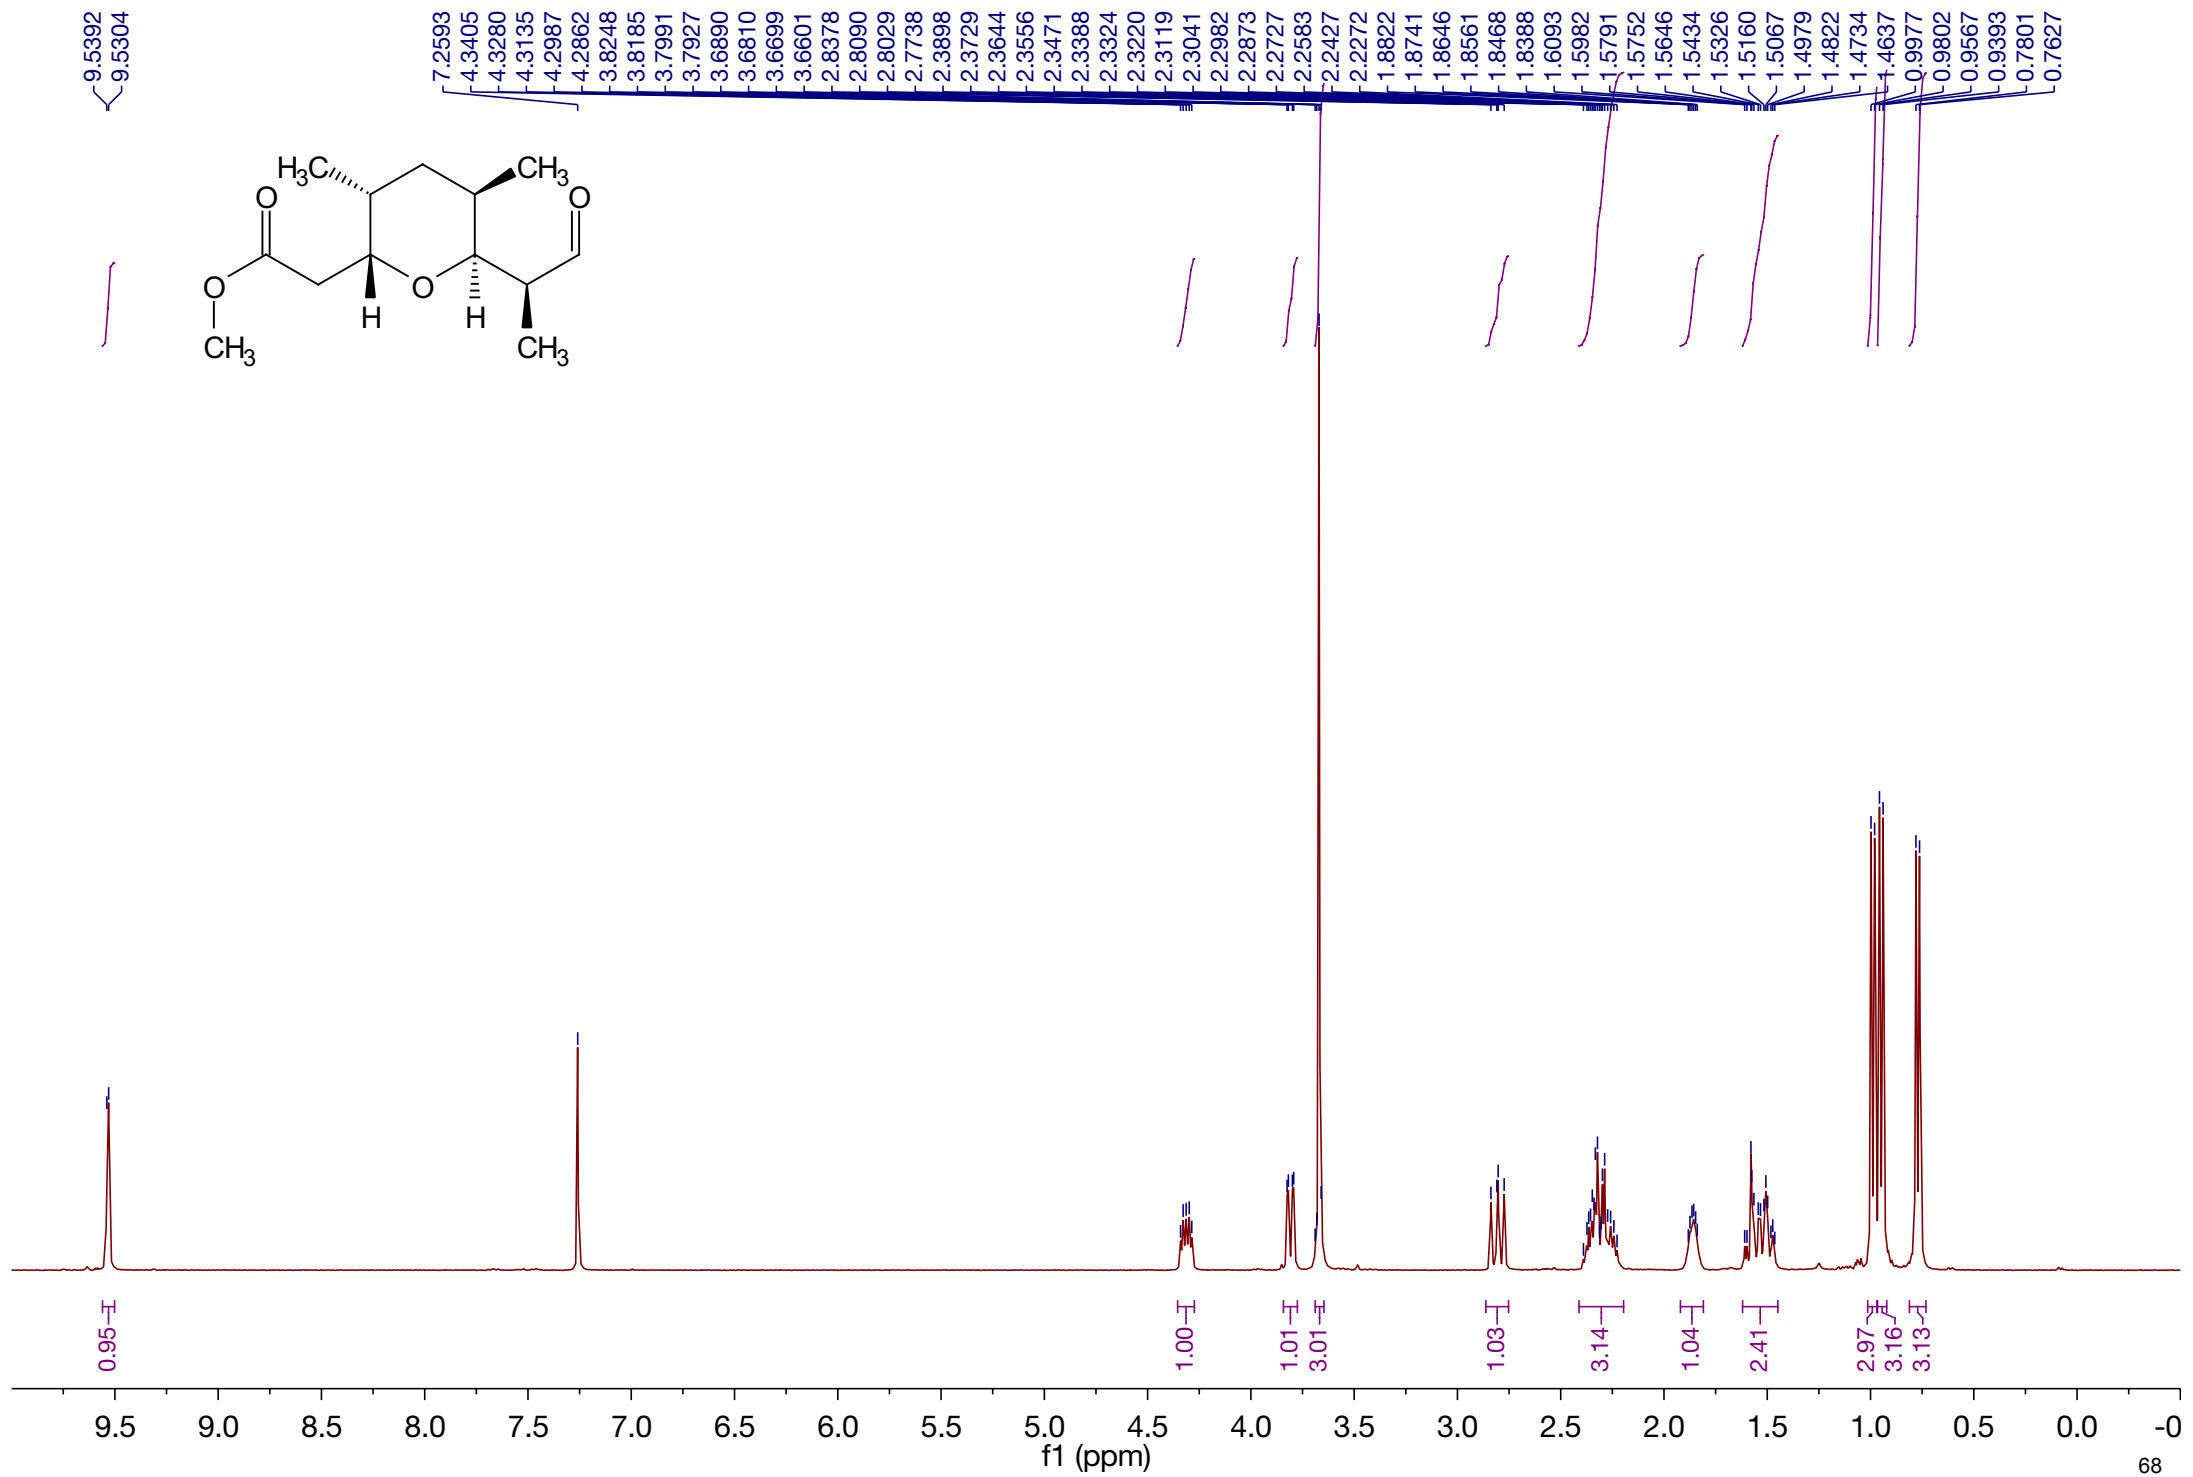

Compound 7

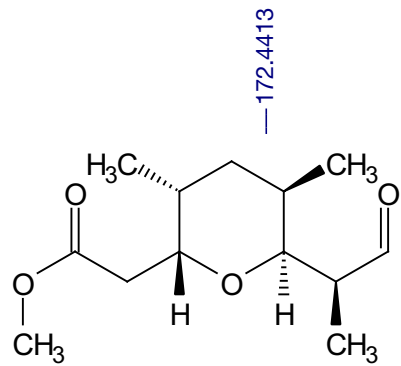

—205.3160

—172.4413

77.4778  
77.1599  
76.8420  
75.3122  
71.9929

—51.9986  
—48.3274

~34.3802  
~31.7709  
~28.5813  
~26.8057

~17.5395  
~11.8764  
~9.7613

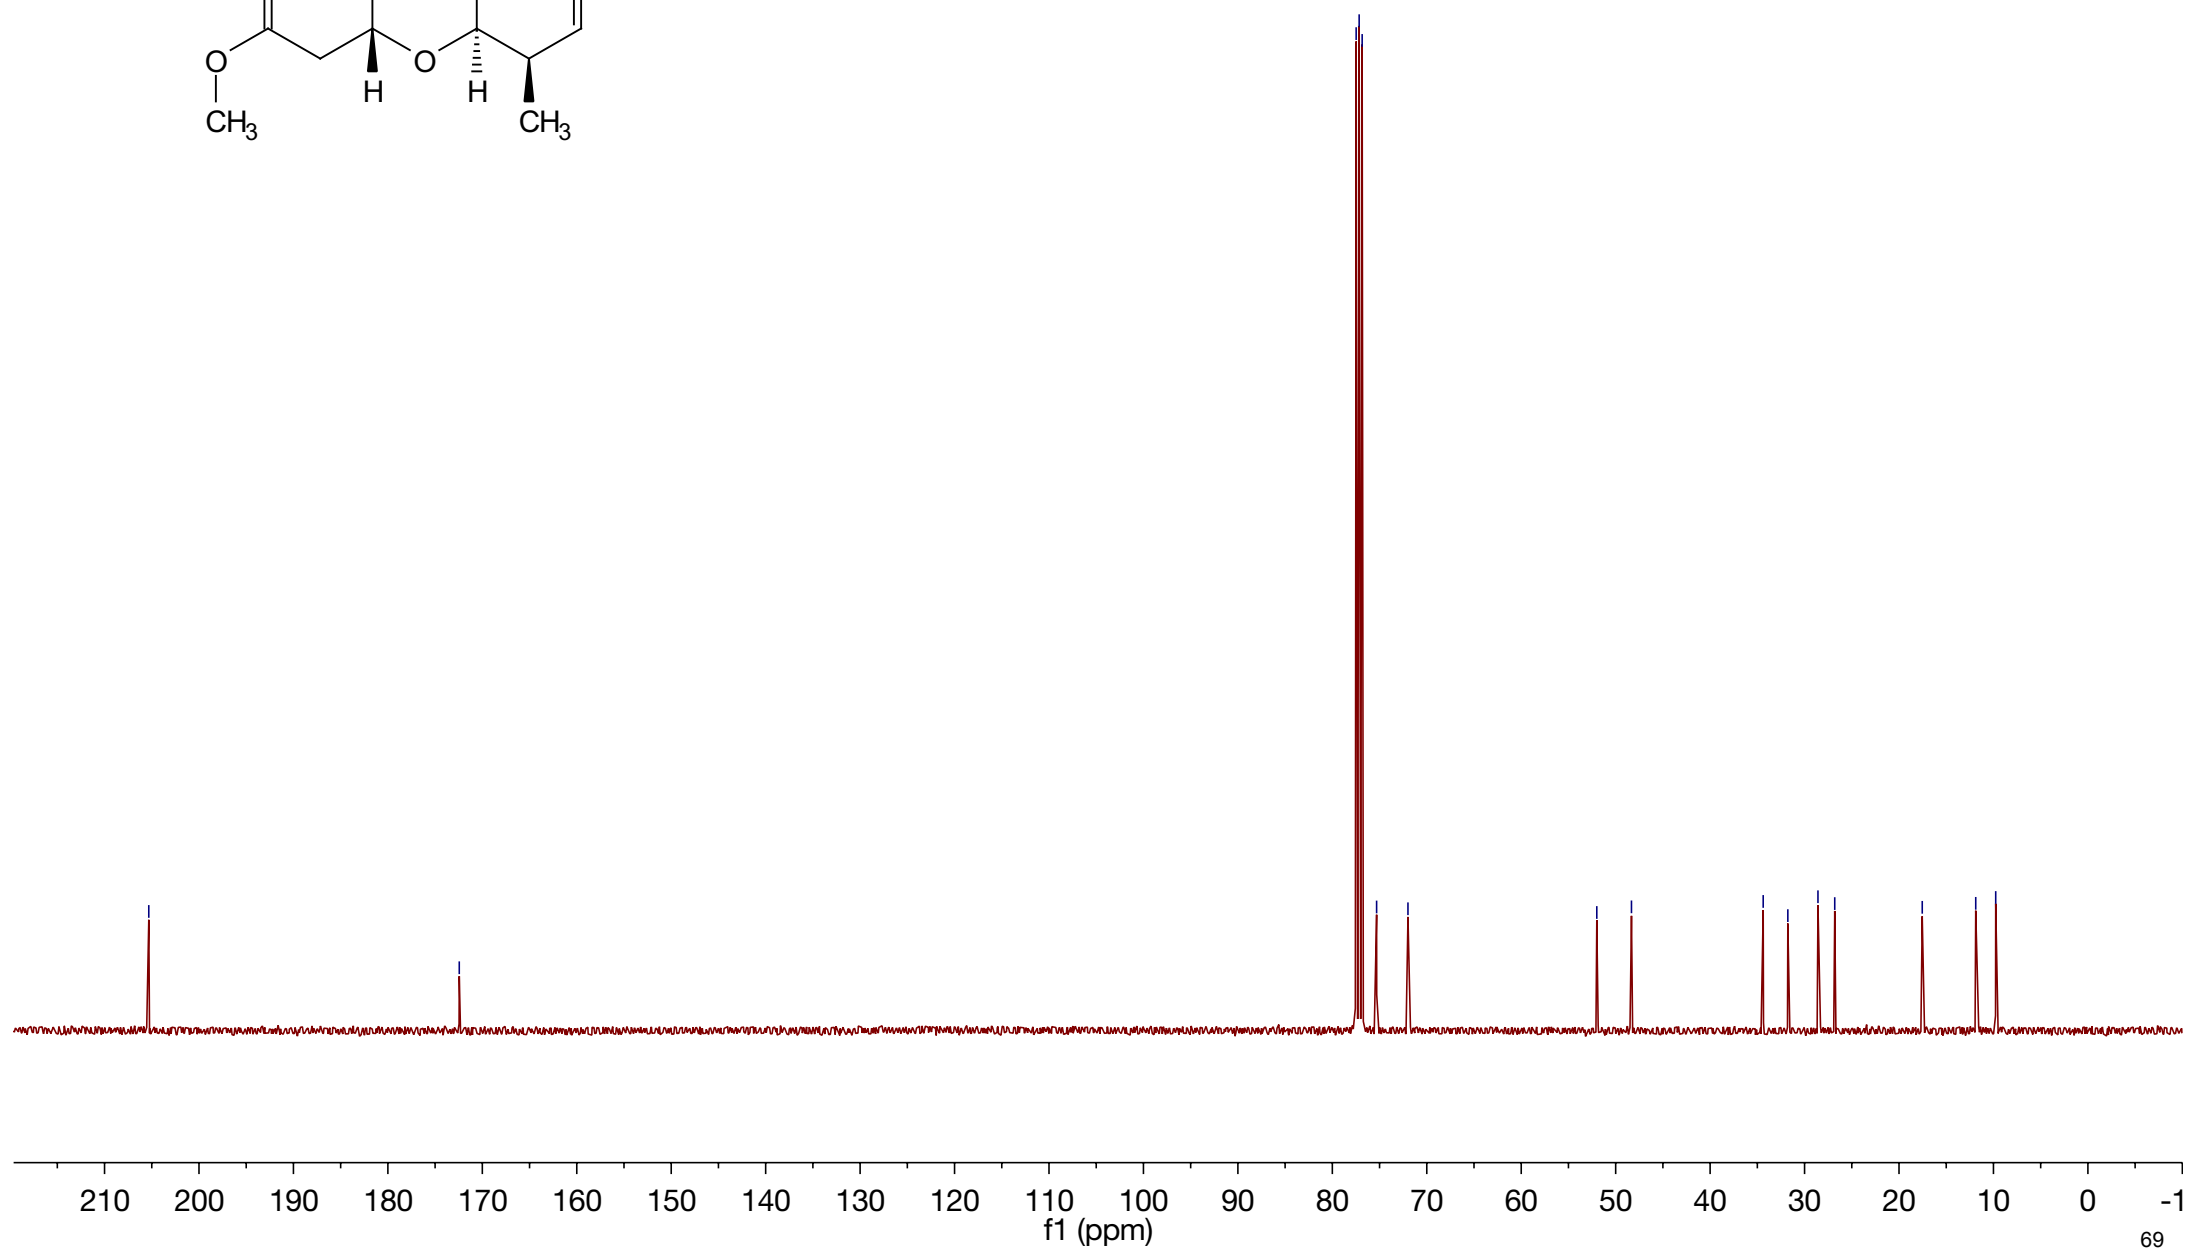

Compound 17

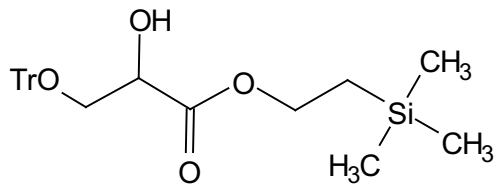

7.462  
7.458  
7.441  
7.331  
7.314  
7.309  
7.294  
7.273  
7.270  
7.266  
7.258  
7.252  
7.245  
7.234

4.321  
4.315  
4.298  
4.294  
4.277  
4.272  
4.266  
4.266  
4.258  
4.255  
4.247  
4.240  
3.525  
3.517  
3.501  
3.494  
3.396  
3.388  
3.373  
3.365  
3.277  
3.258

1.005  
0.999  
0.989  
0.982  
0.978  
0.972  
0.962  
0.956

0.046

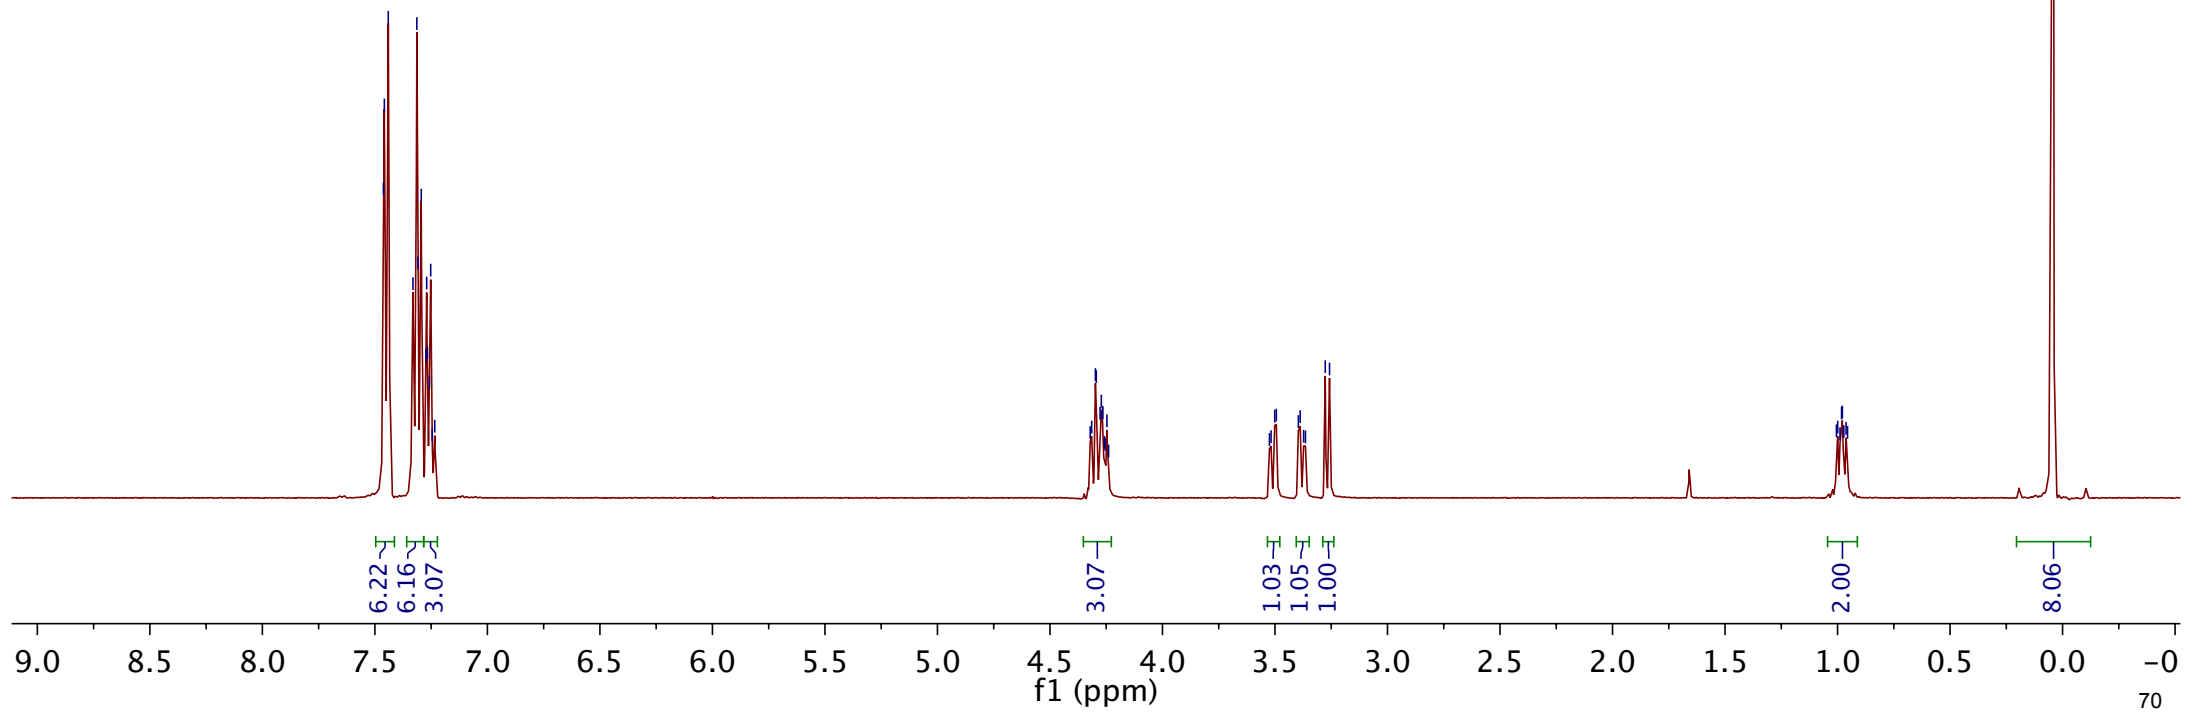

Compound 17

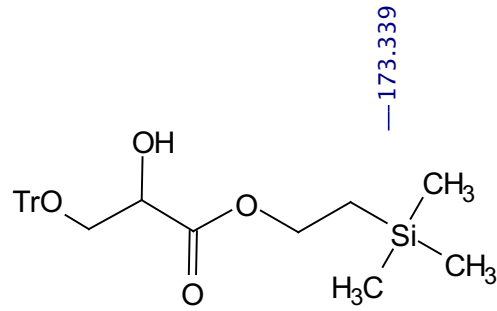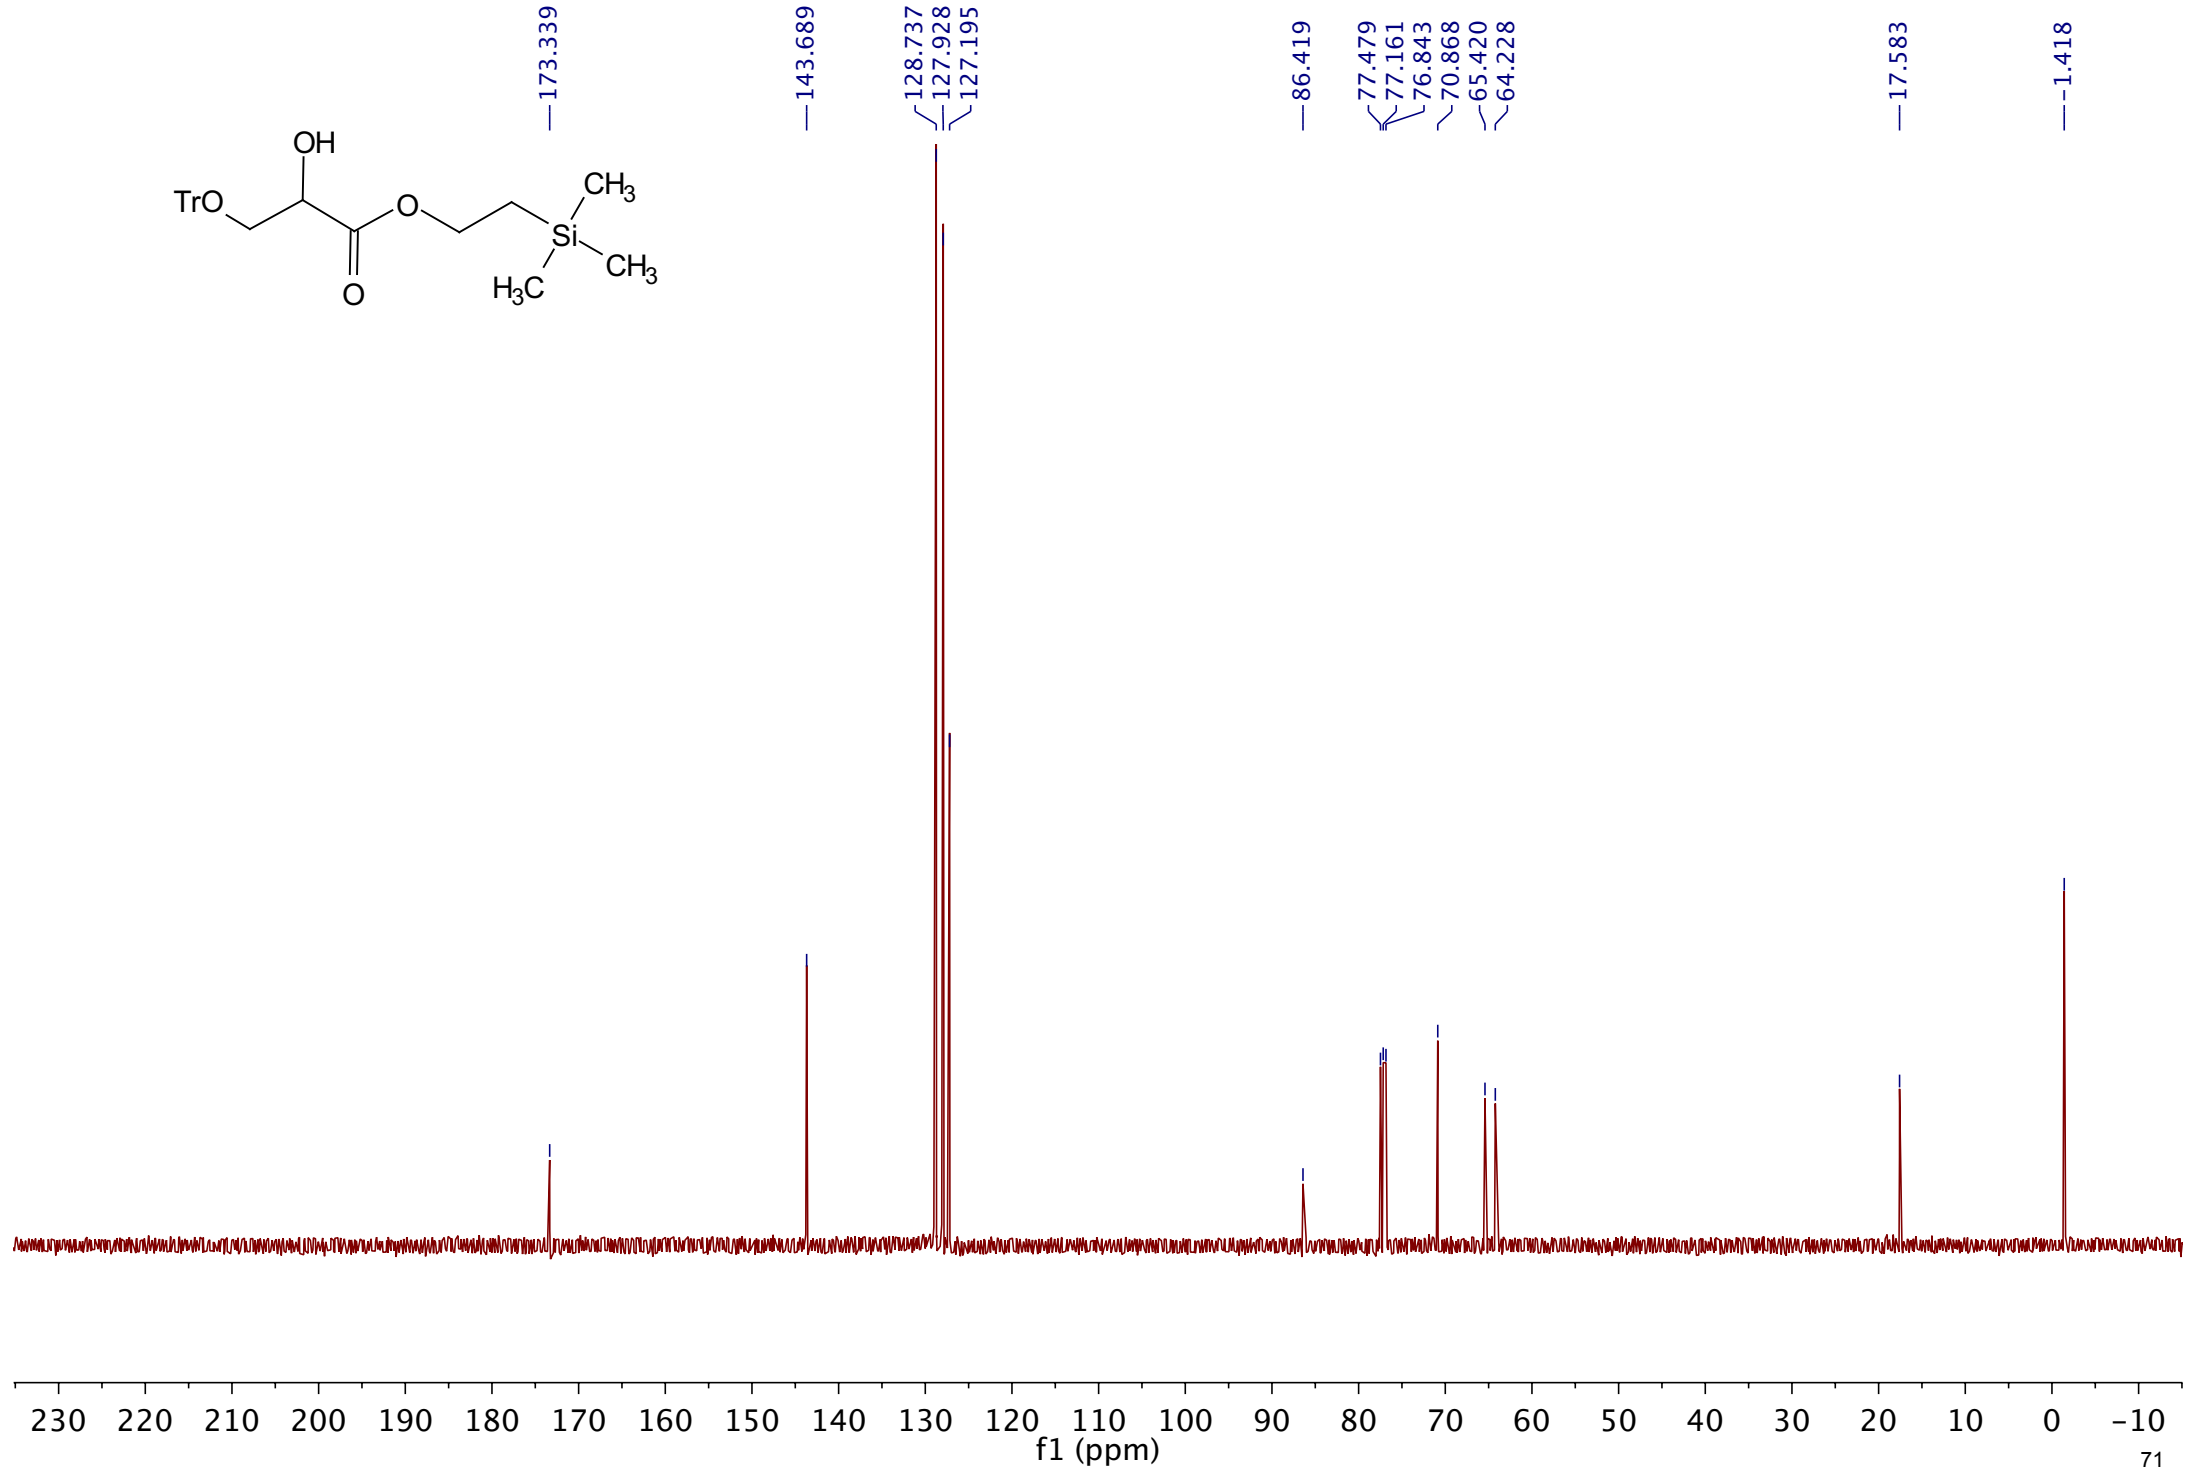

Compound 18

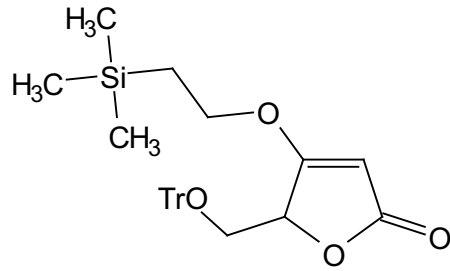

7.448  
7.444  
7.427  
7.334  
7.330  
7.325  
7.313  
7.294  
7.276  
7.274  
7.270  
7.267  
7.259  
7.253  
7.251  
7.246  
7.238  
7.234  
7.231

5.145  
4.837  
4.833  
4.830  
4.826  
4.822  
4.820  
4.163  
4.145  
4.138  
4.118  
4.096  
4.076  
4.069  
4.051  
3.609  
3.602  
3.583  
3.576  
3.294  
3.283  
3.268  
3.257

1.103  
1.098  
1.083  
1.079  
1.076  
1.061  
1.056

0.032

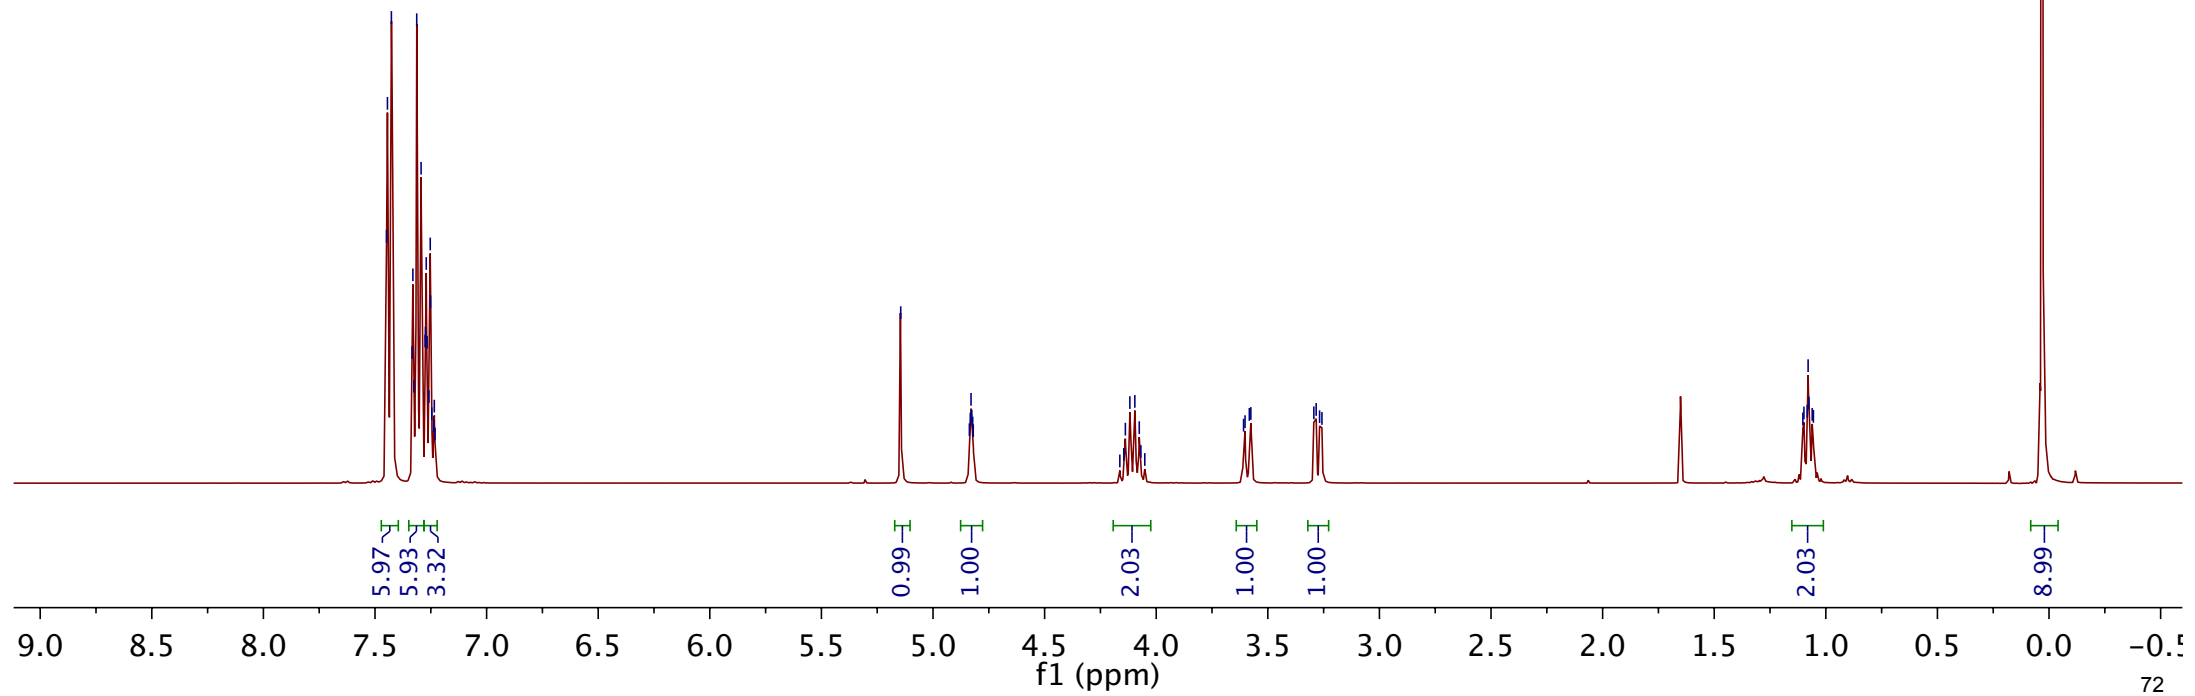



Compound 18

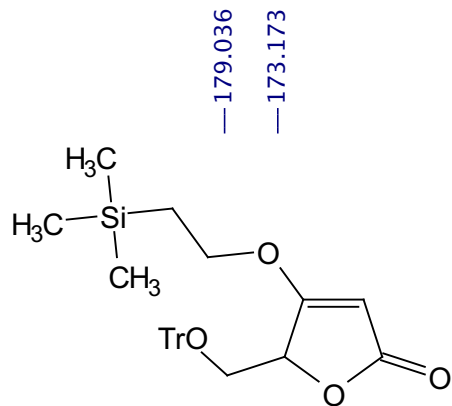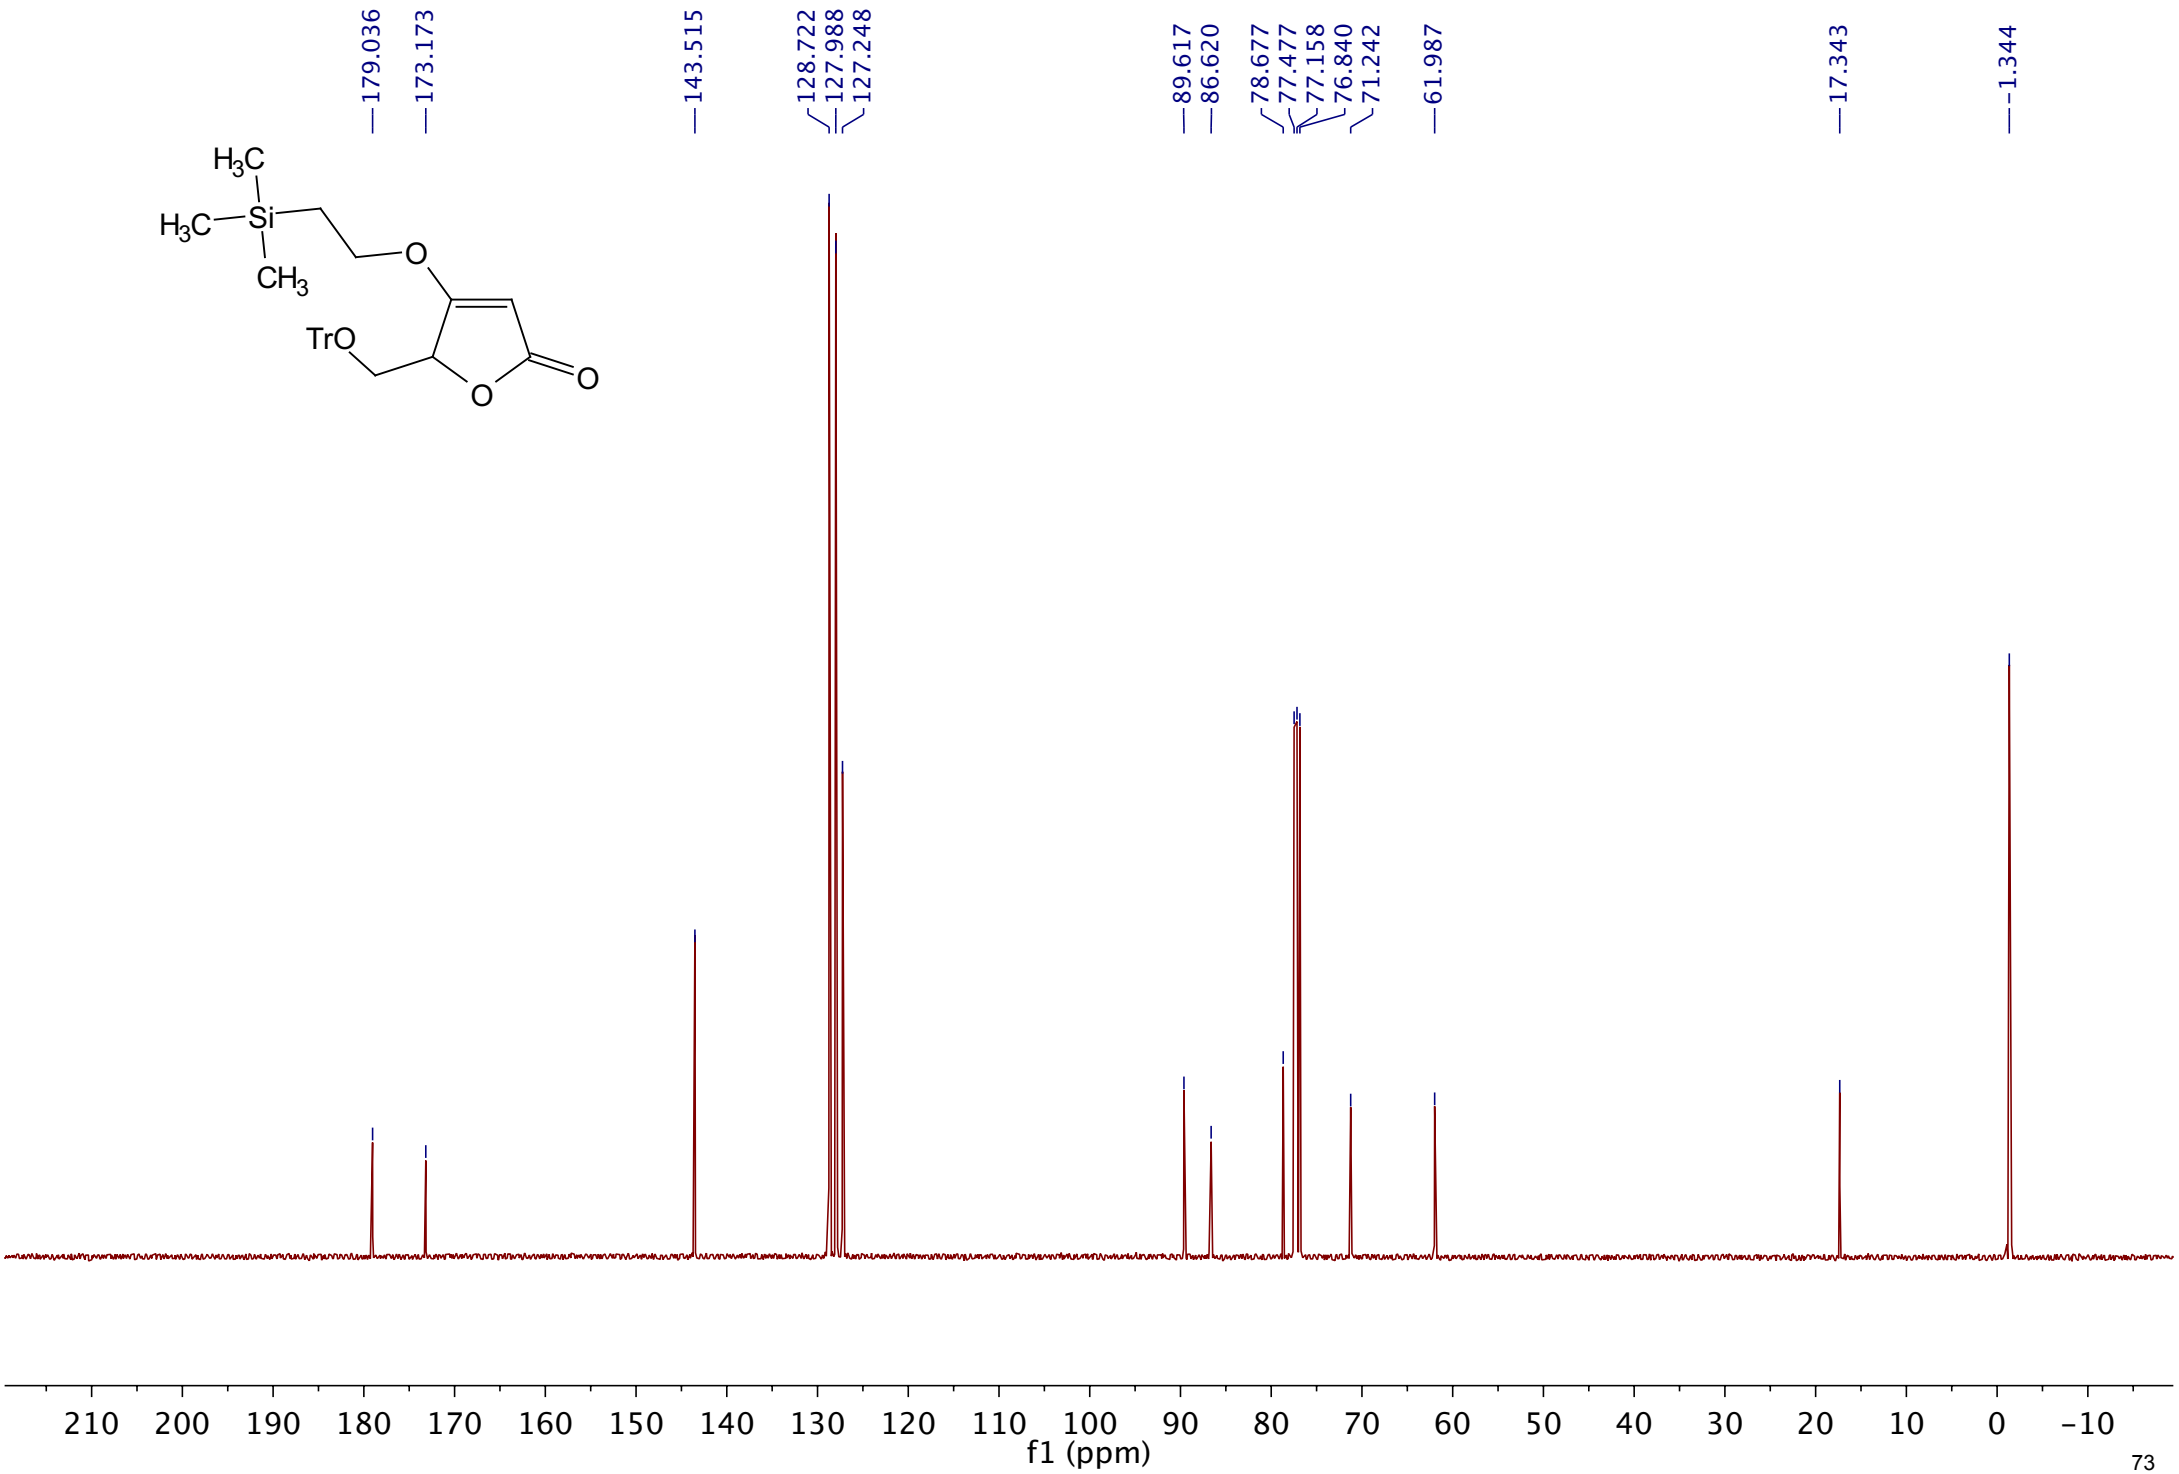

Compound SI-3

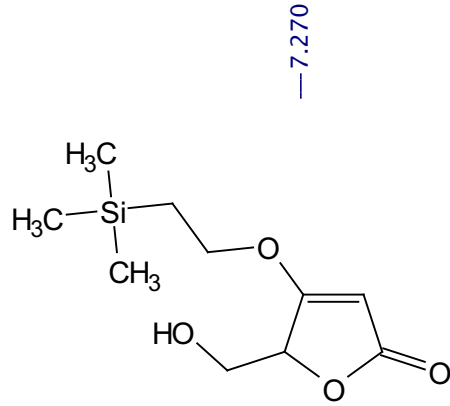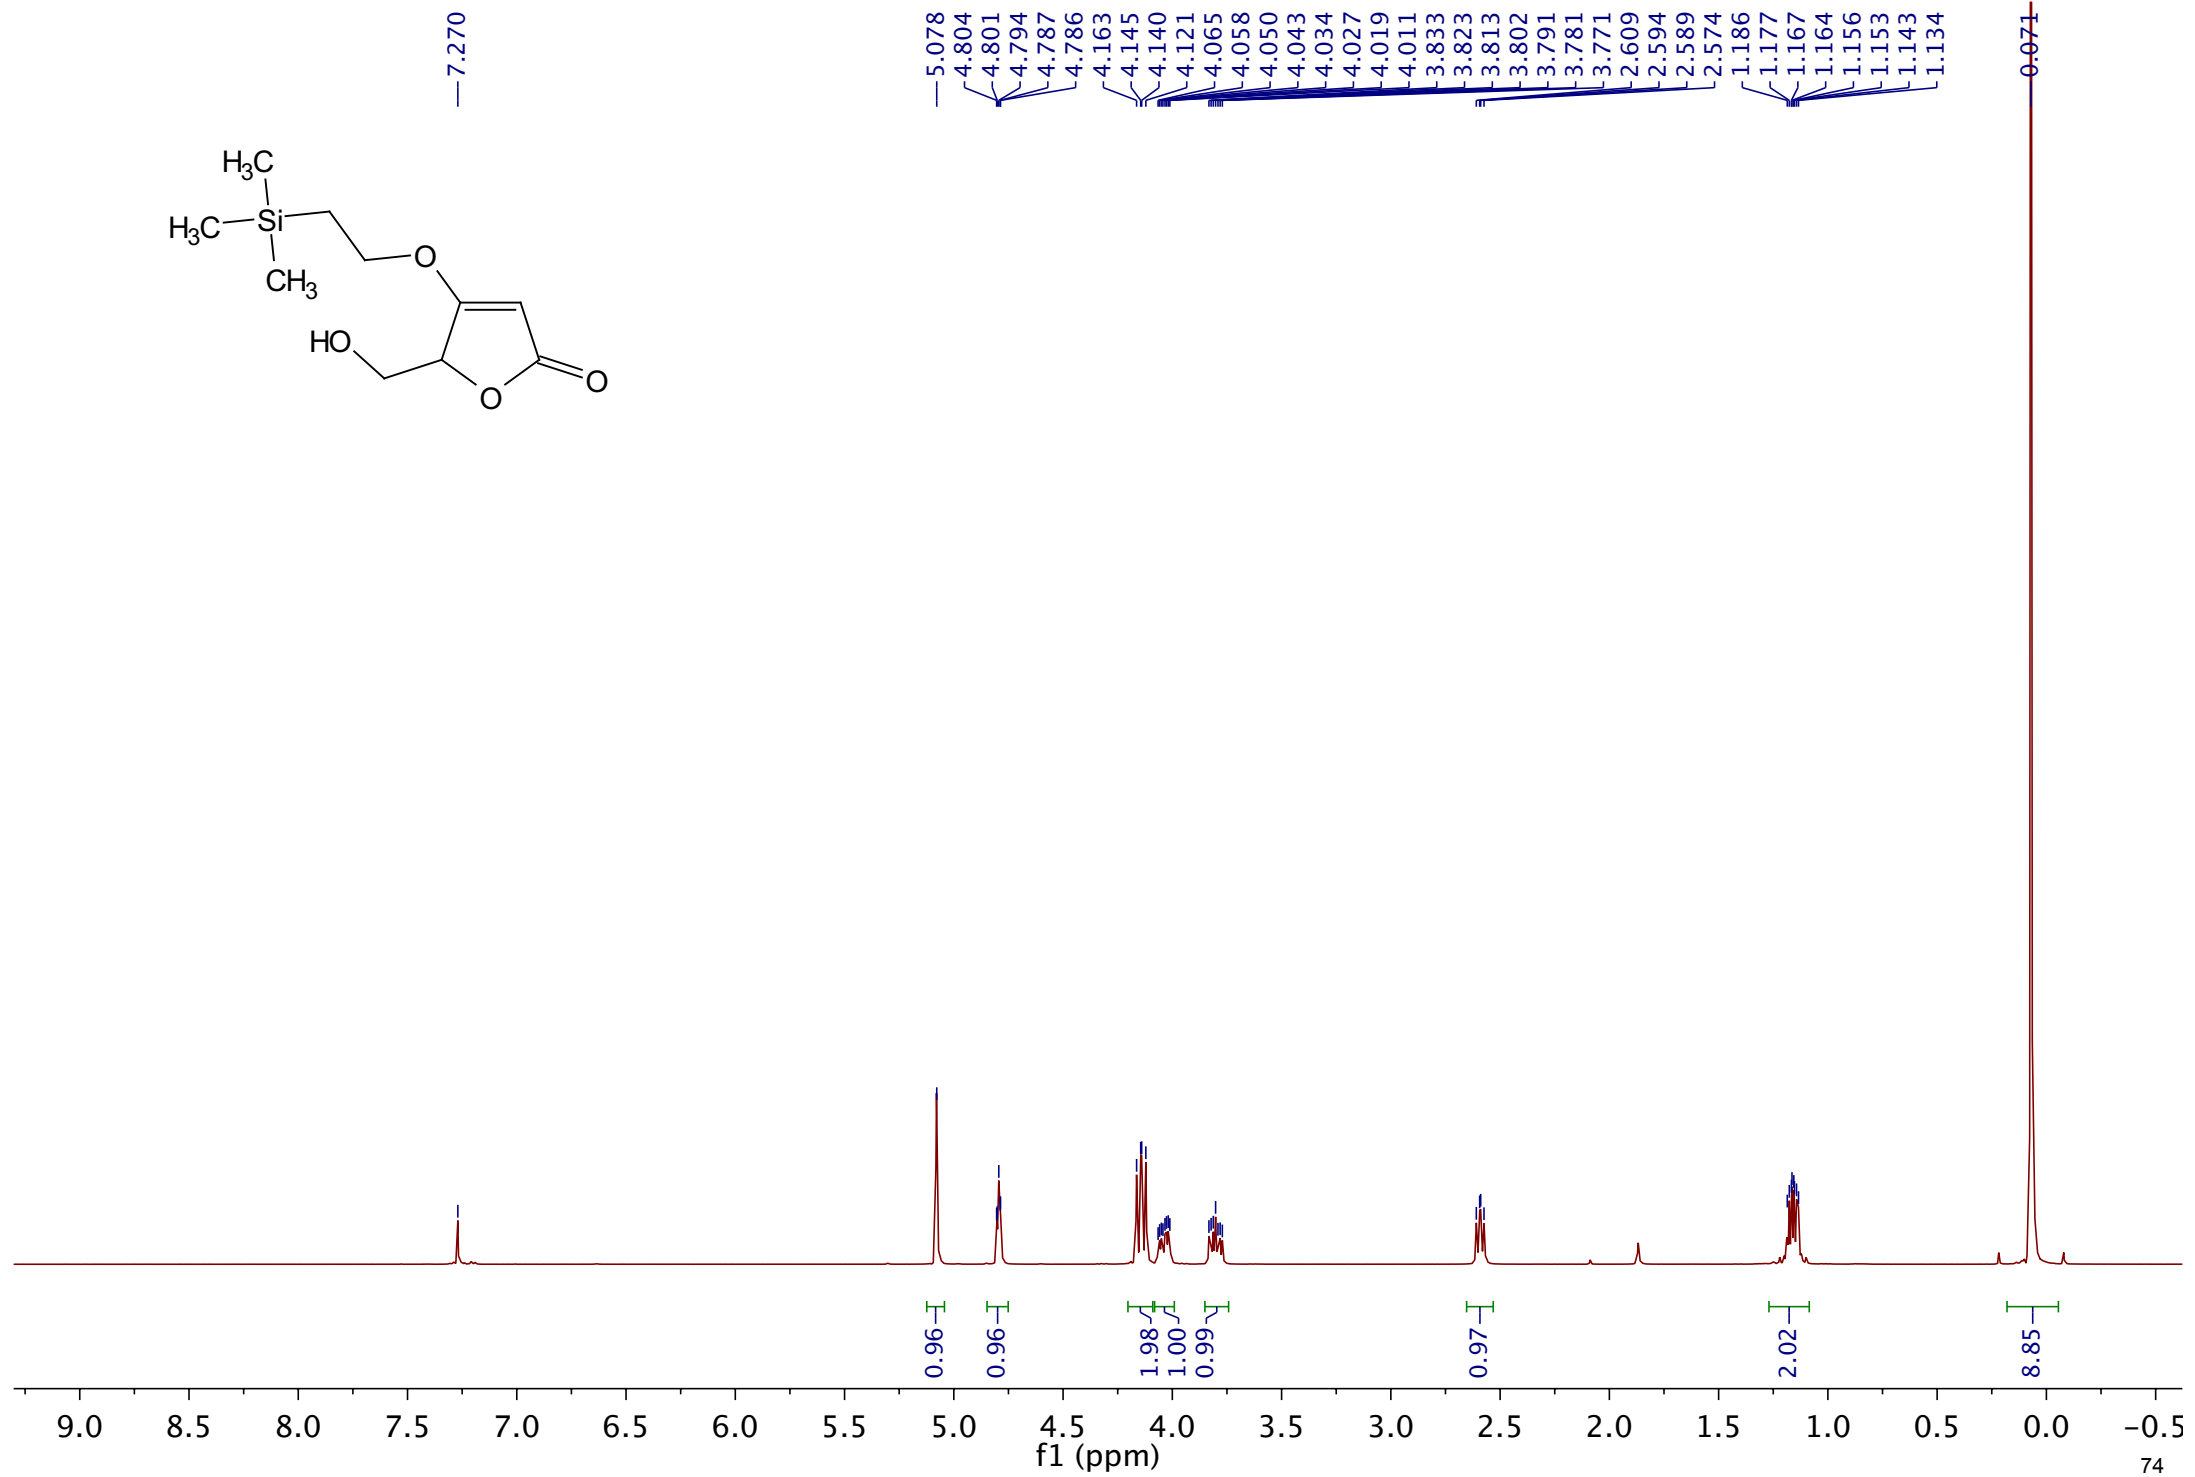

Compound SI-3

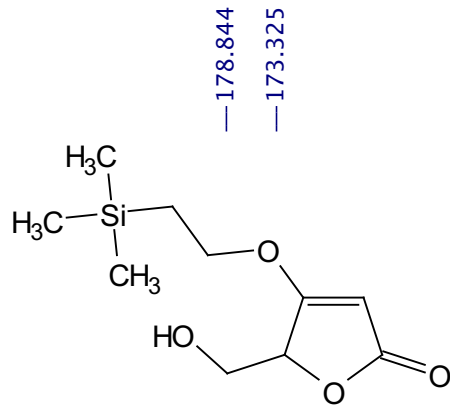

—178.844

—173.325

—89.761

79.941

77.478

77.161

76.842

71.545

—61.221

—17.363

—1.351

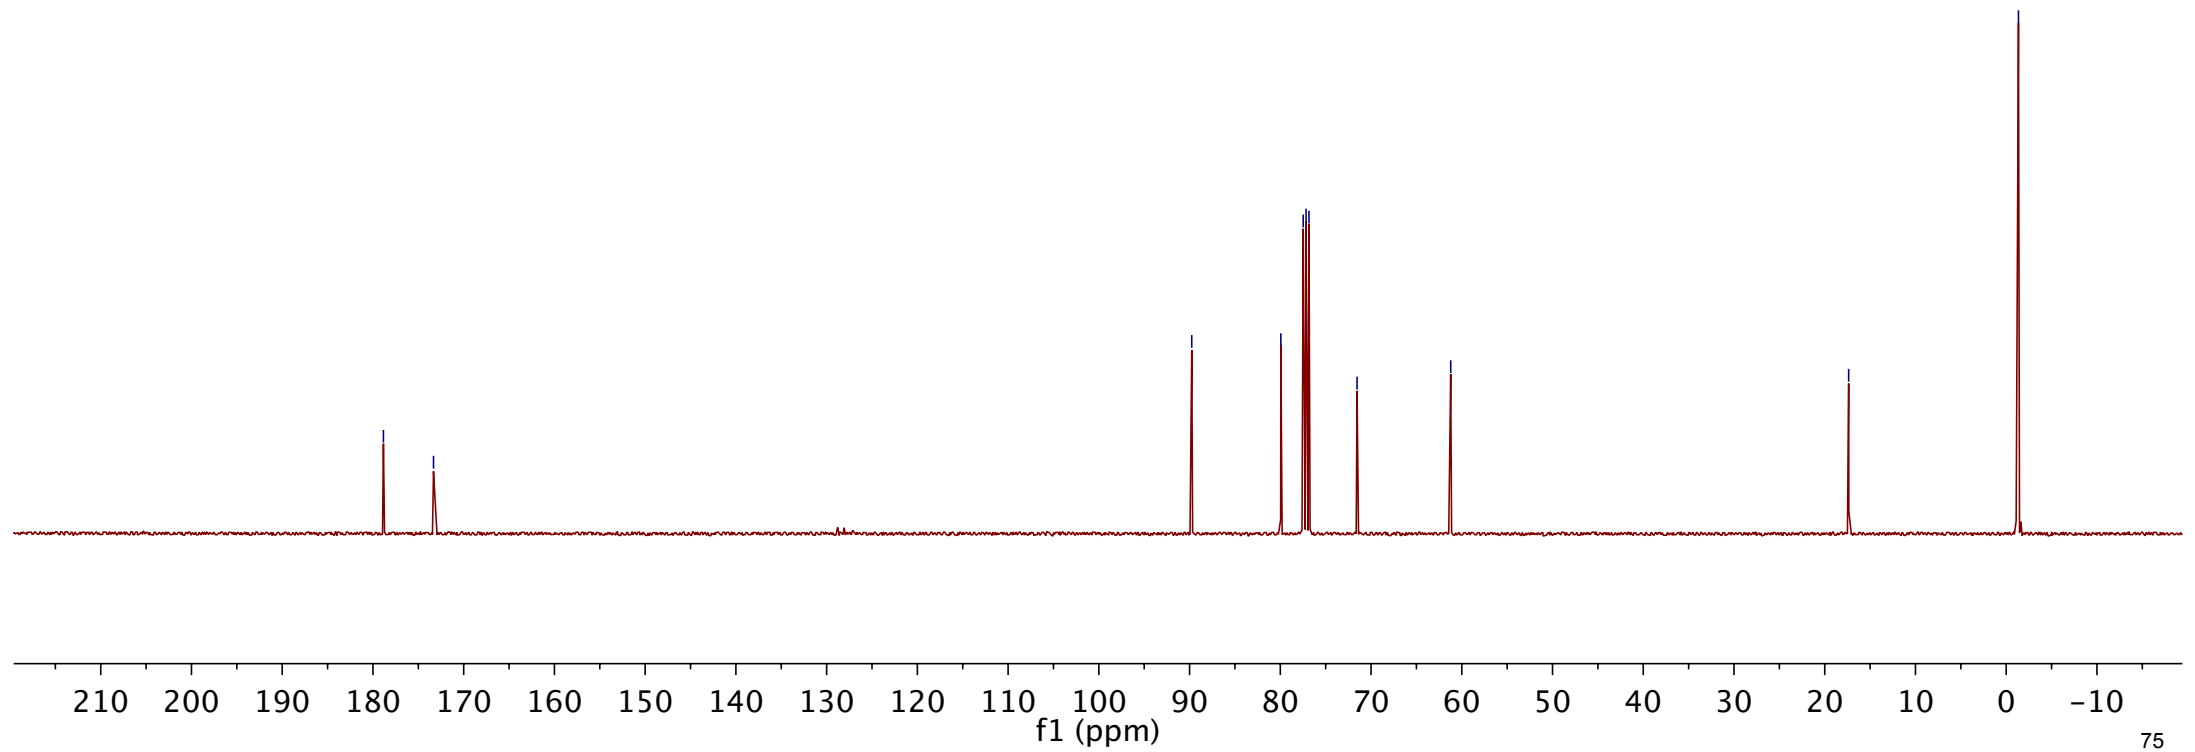

Compound 19

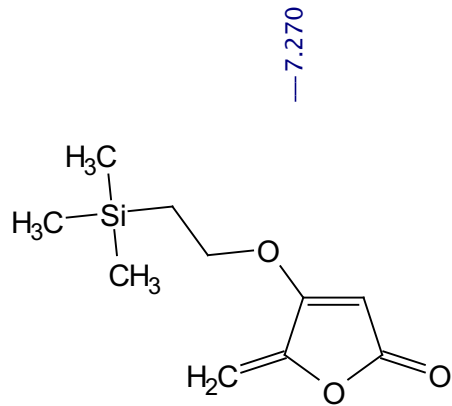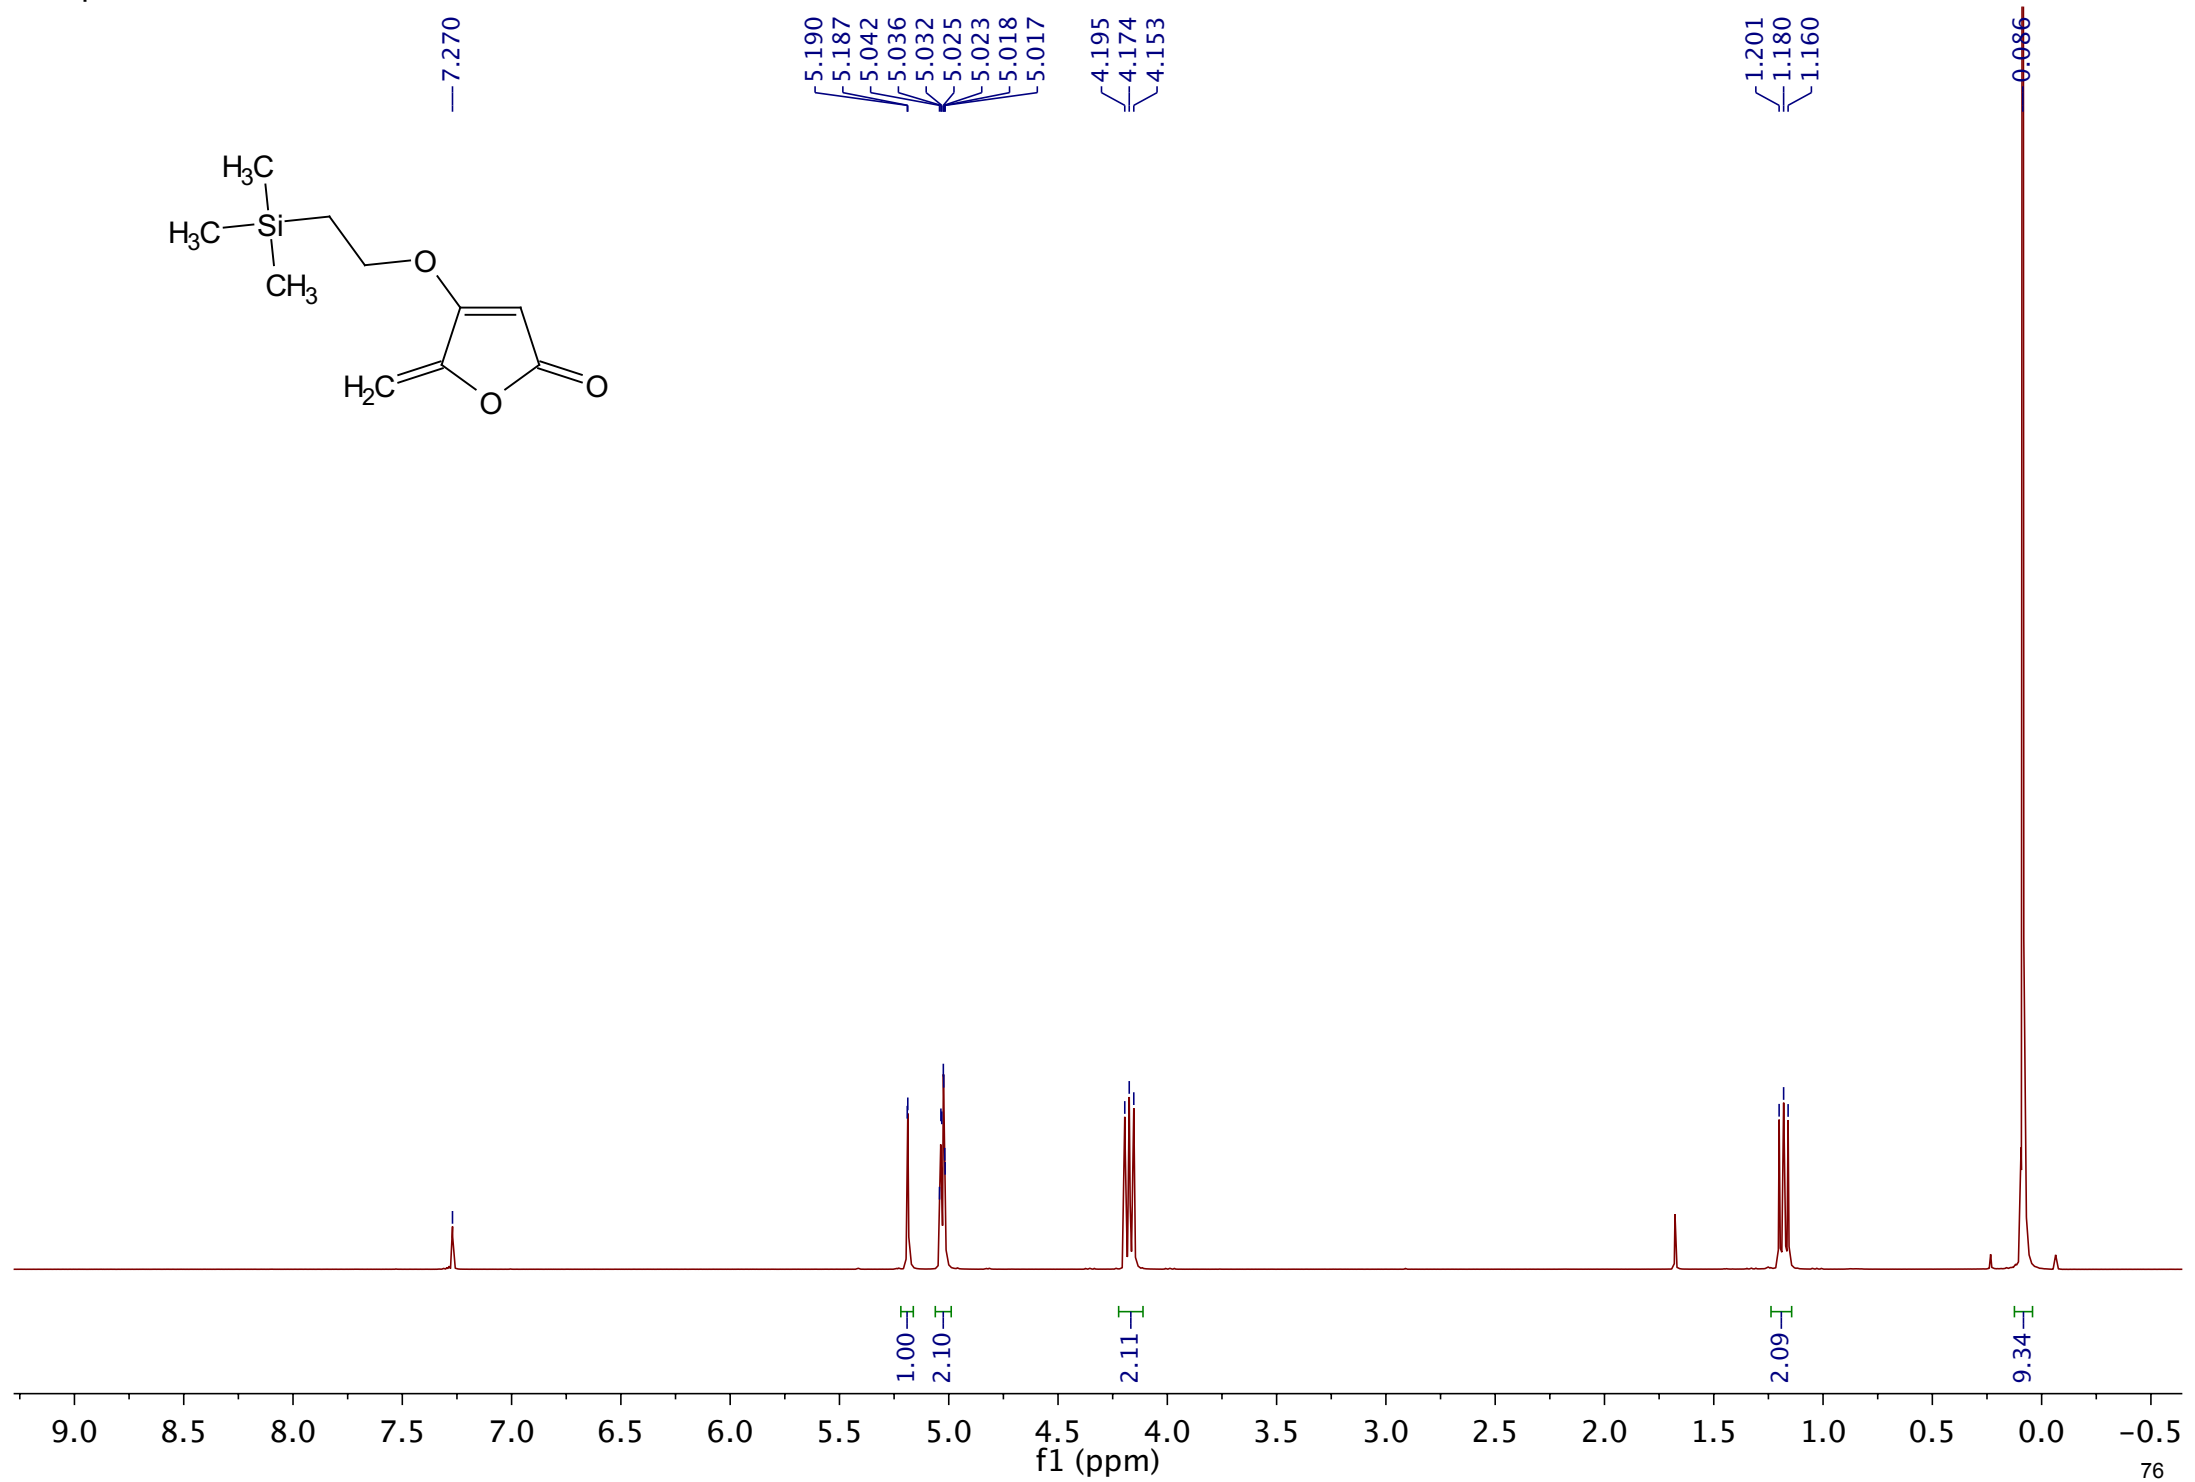

Compound 19

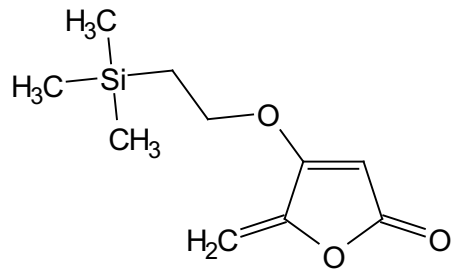

168.802  
168.745

150.217

92.295  
89.844

77.479  
77.161  
76.843  
71.105

17.301

1.319

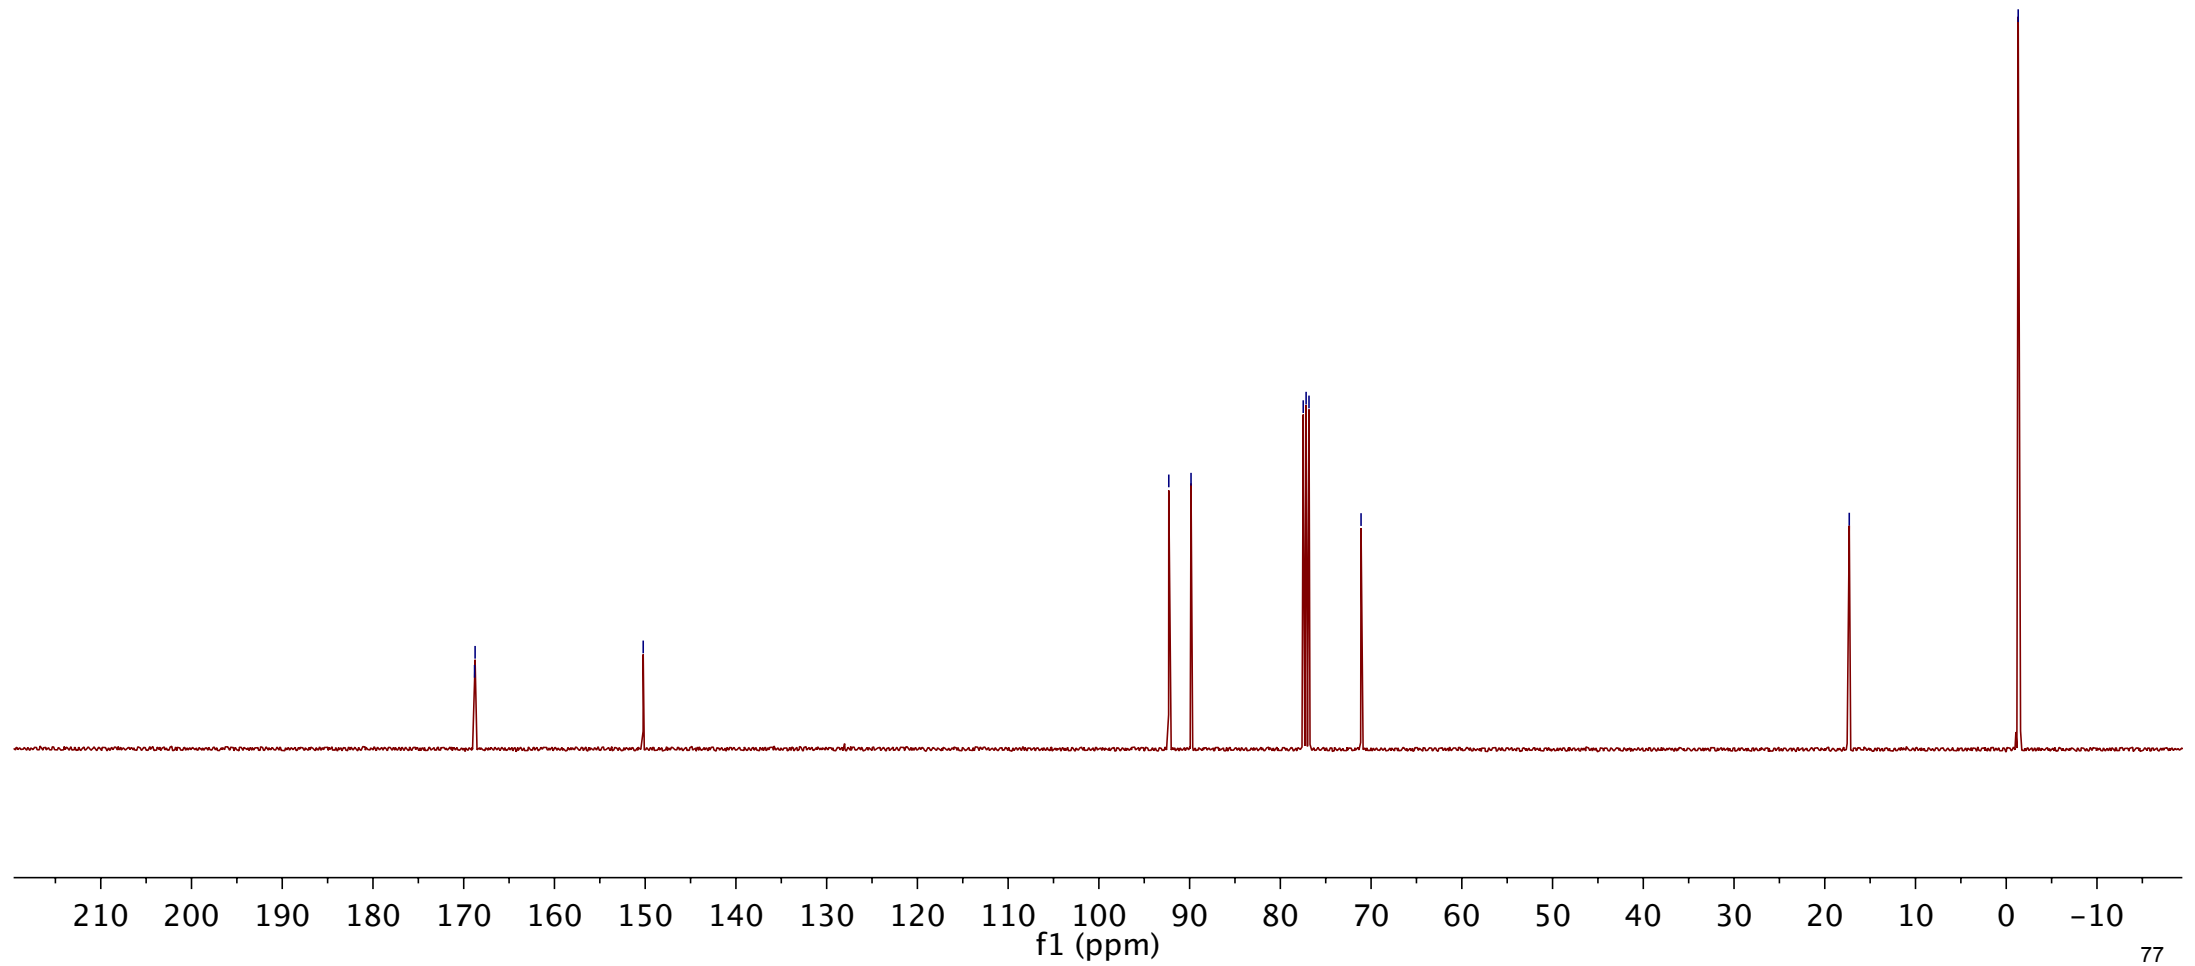

Compound 8a

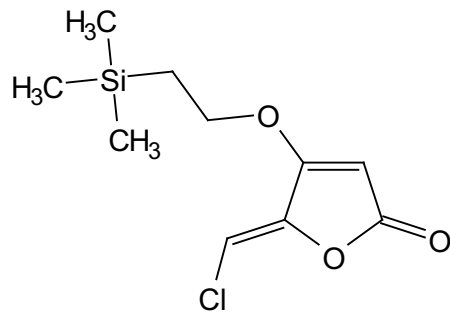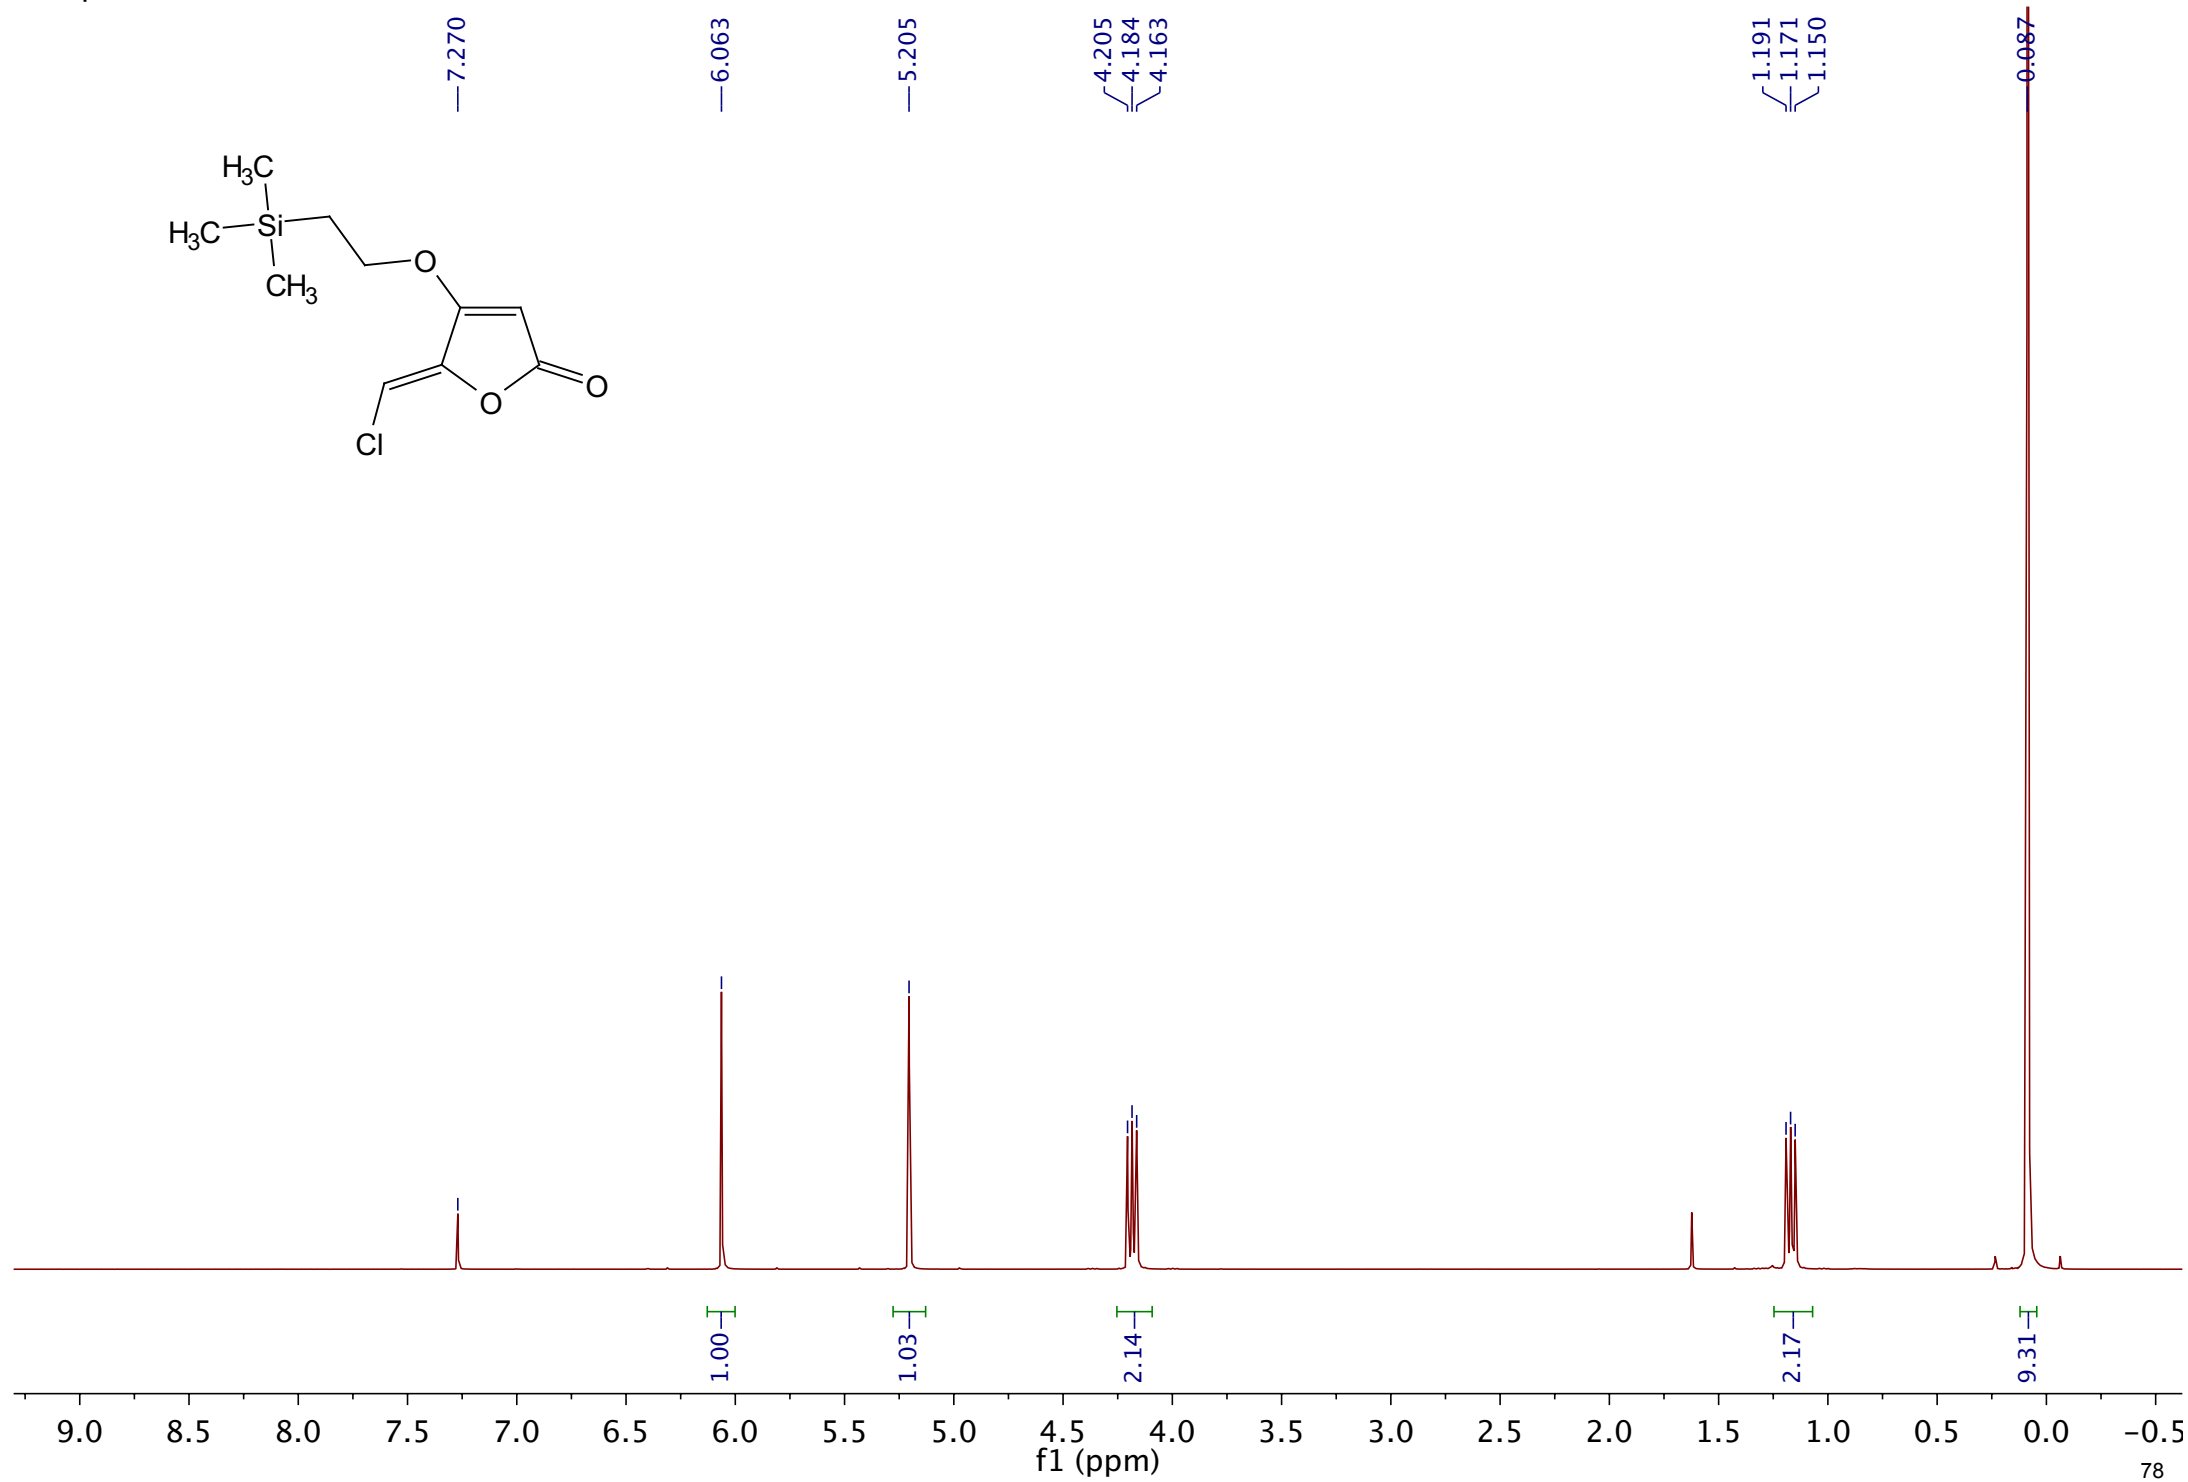

Compound 8a

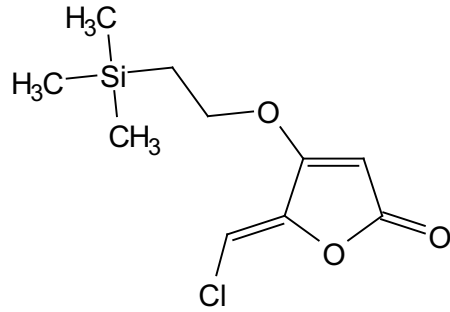

168.045  
167.265

145.391

99.951

89.325

77.479  
77.160  
76.842  
71.560

17.368

1.319

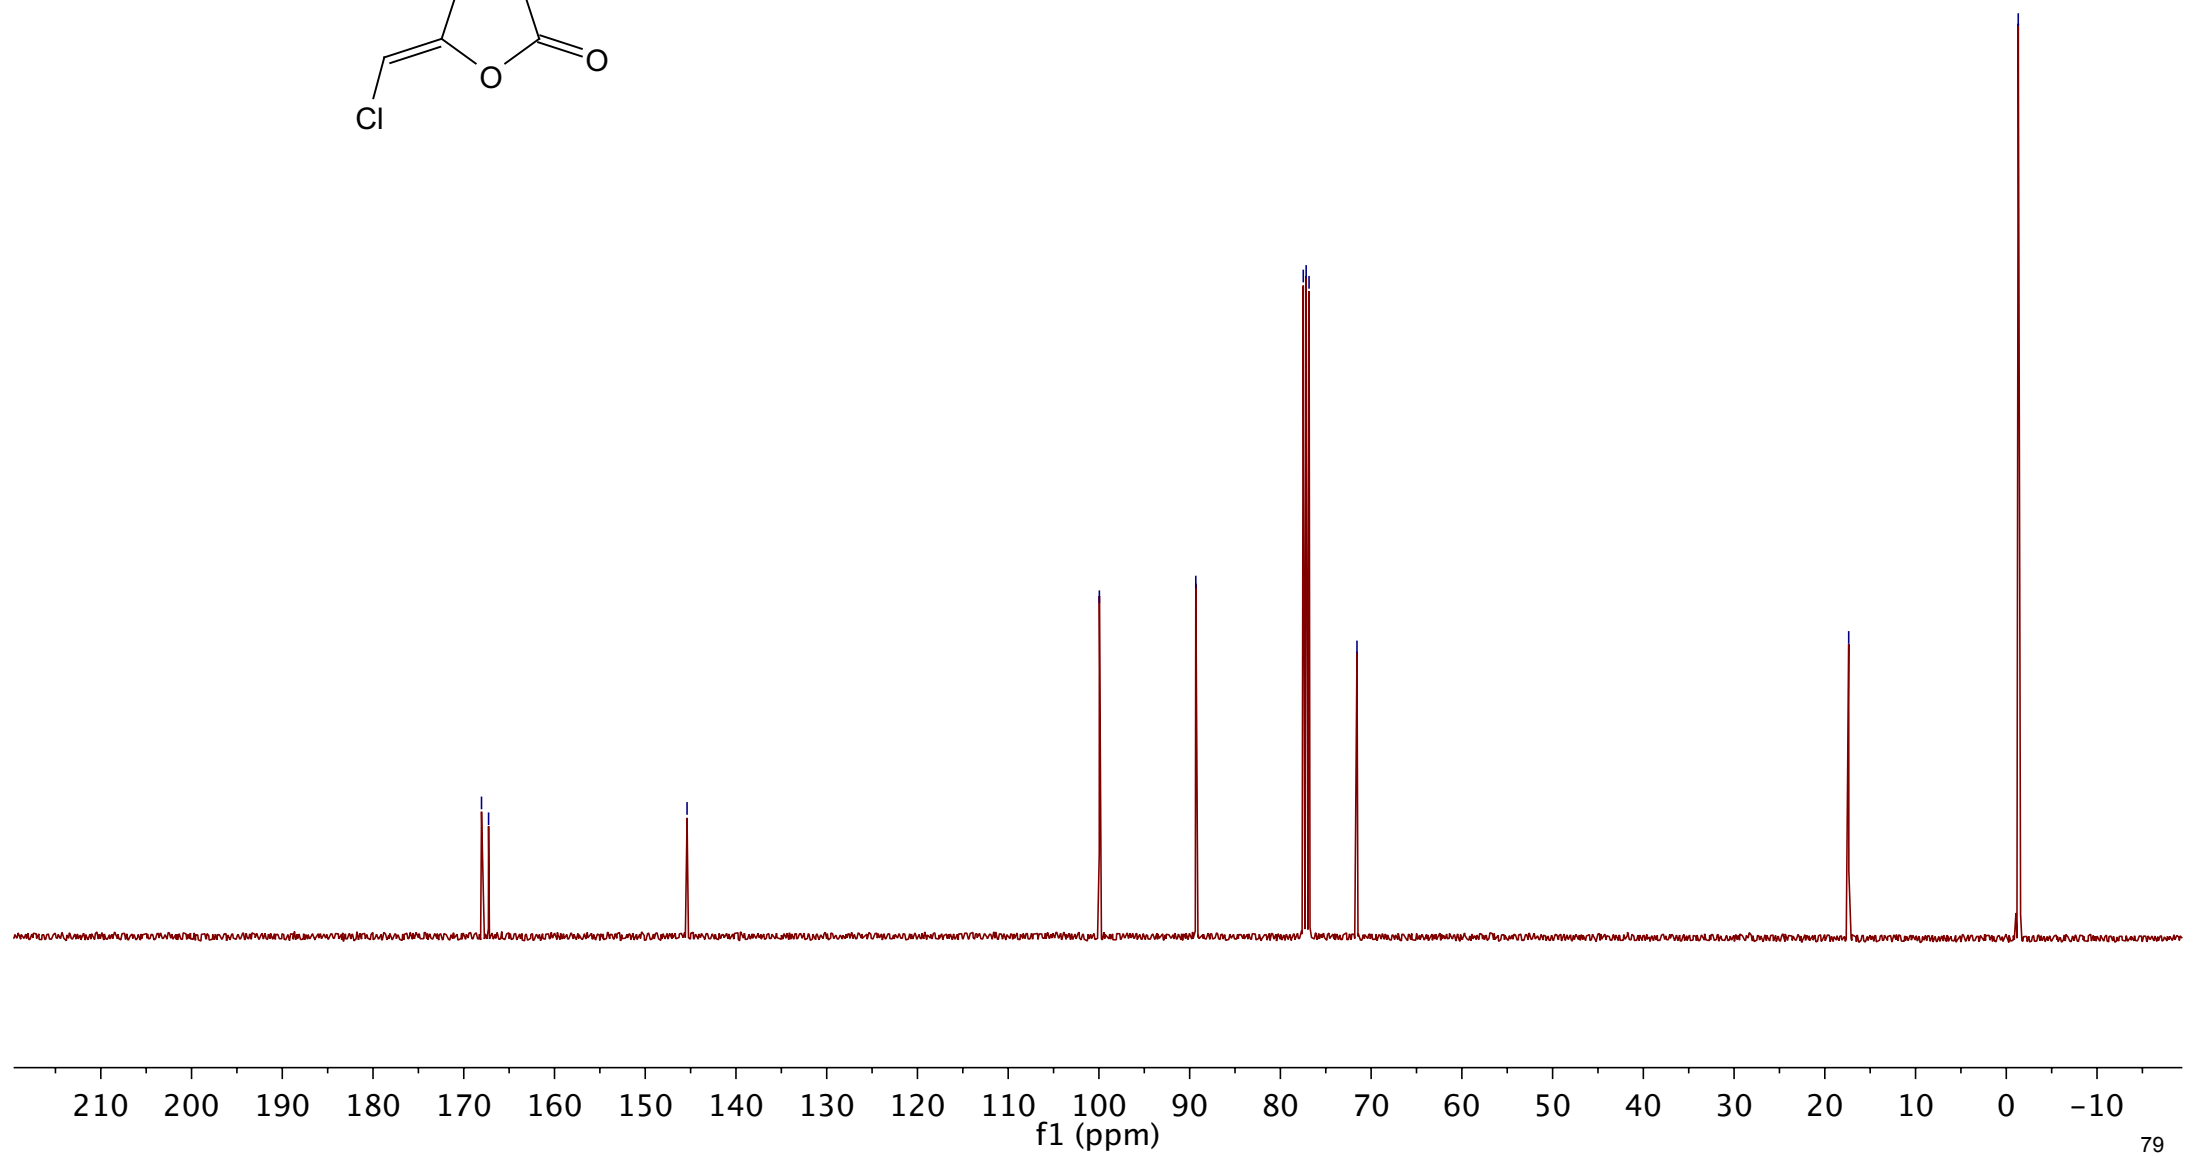

Compound 8b

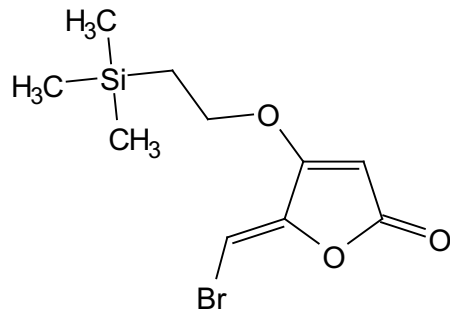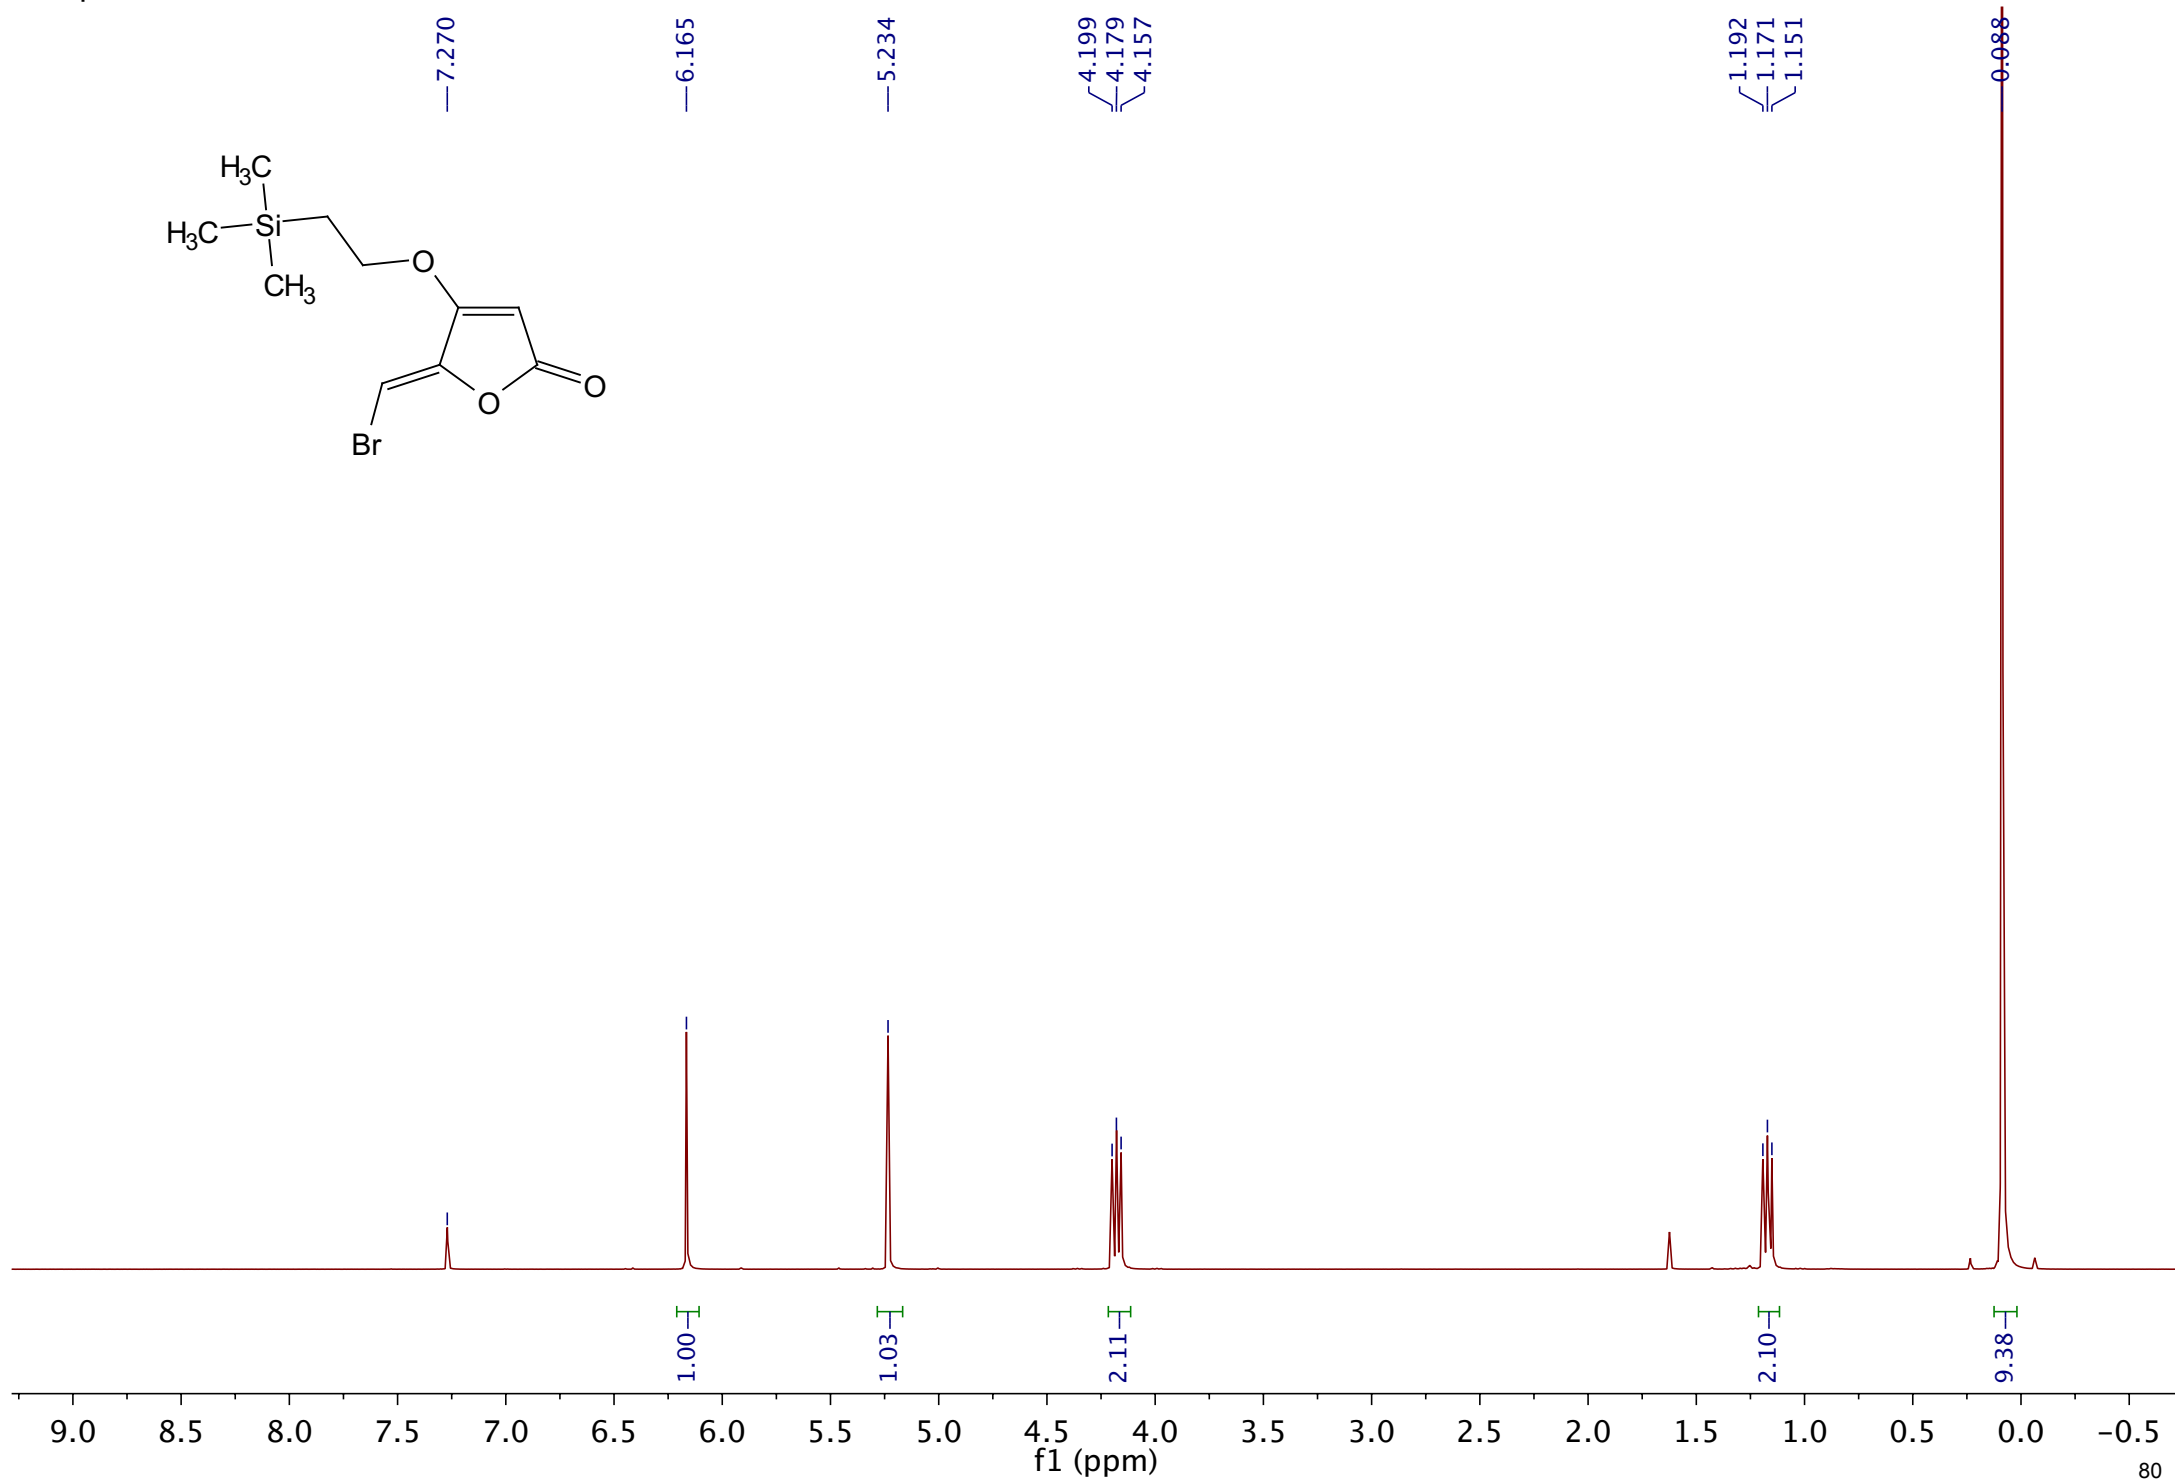



Compound 8b

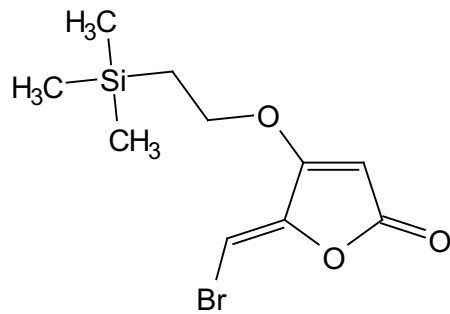

167.690  
167.301

147.400

89.558

87.767

77.477

77.161

76.841

71.576

17.362

1.315

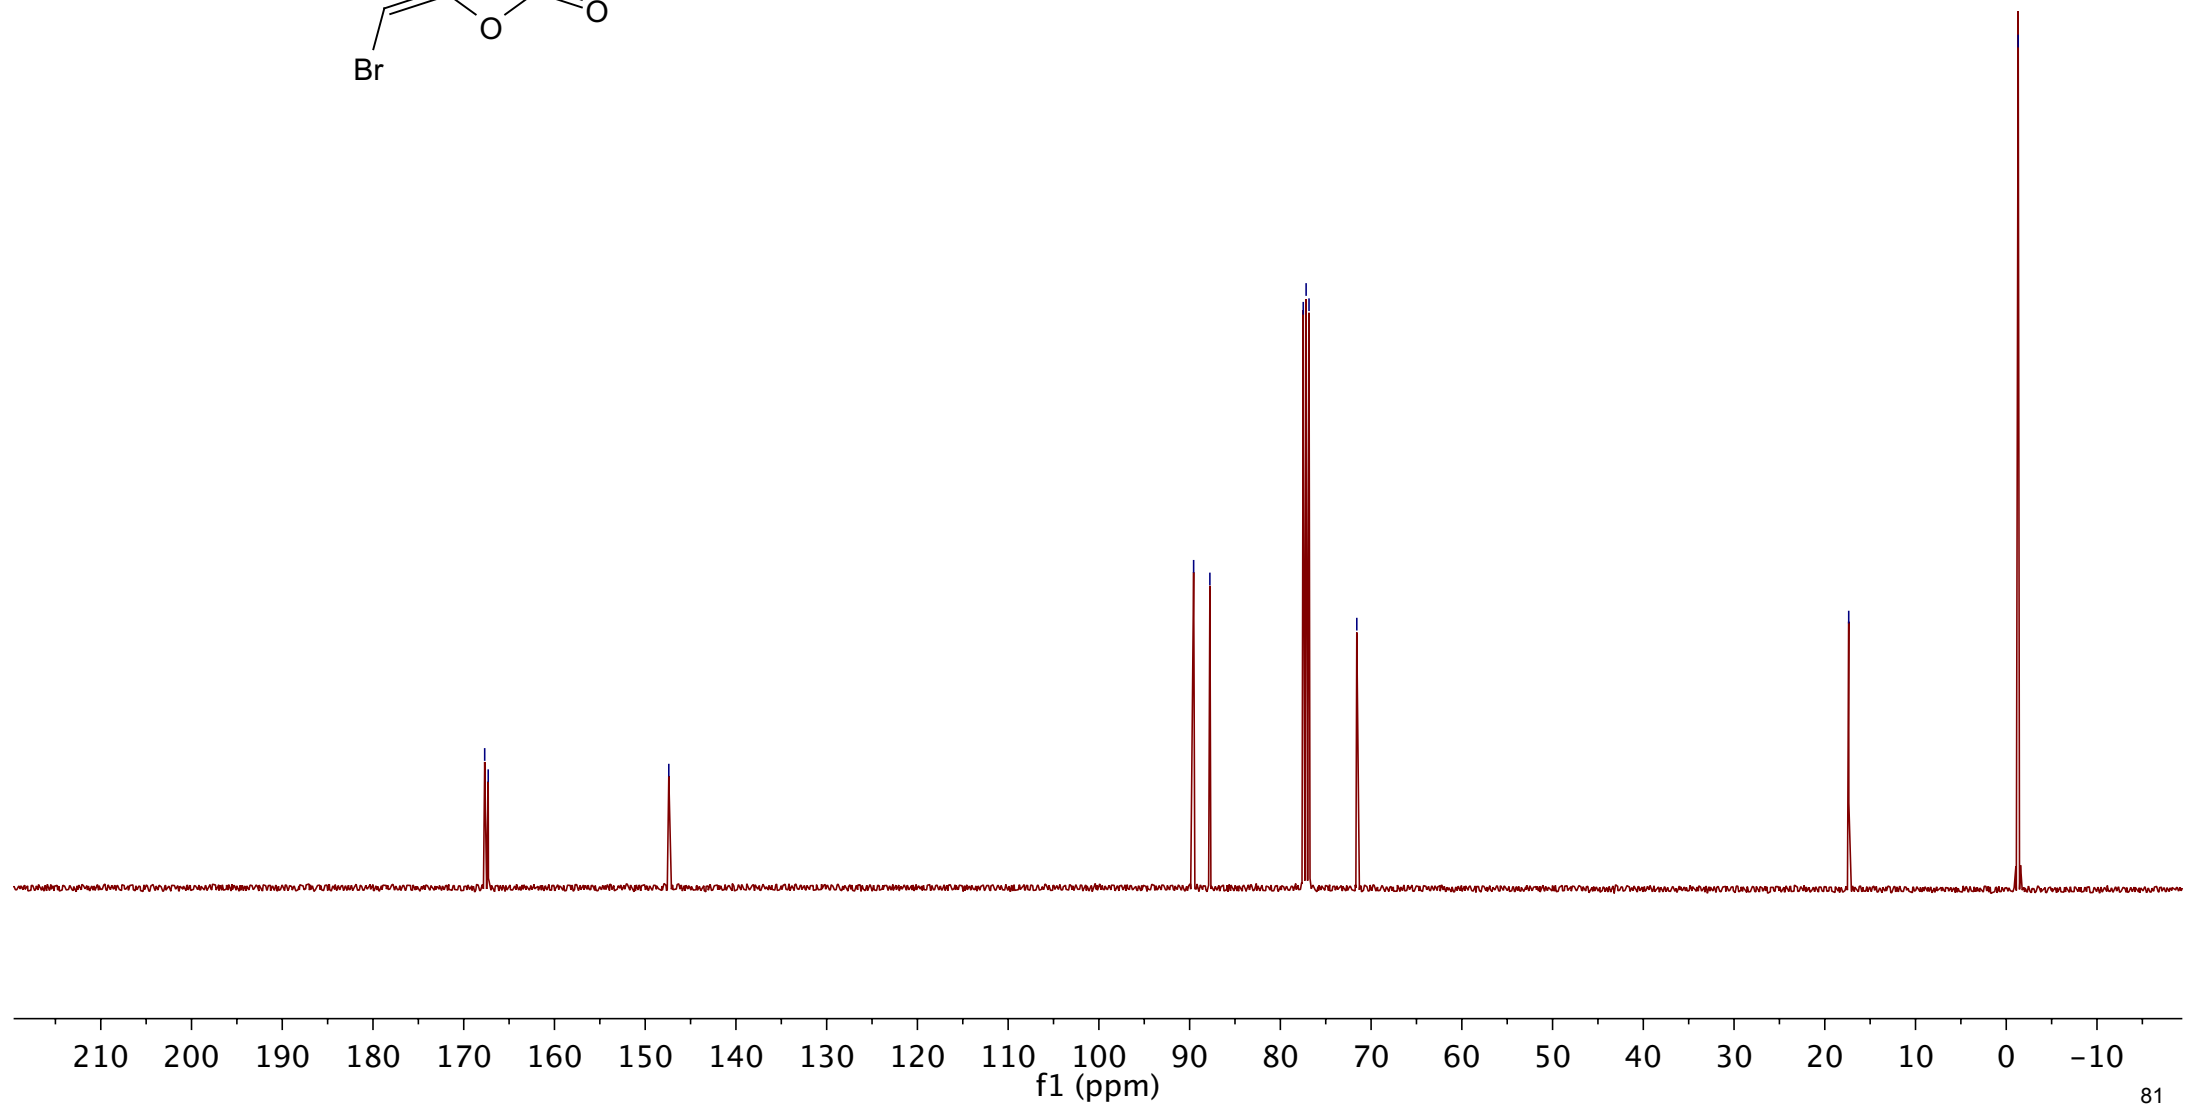

Compound 20a

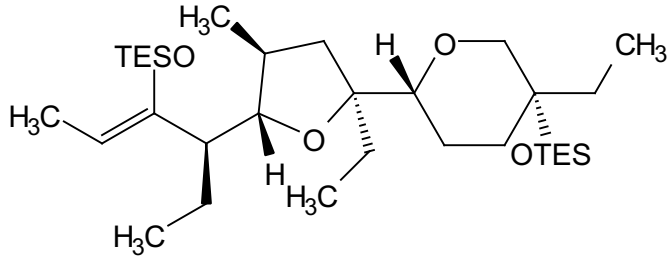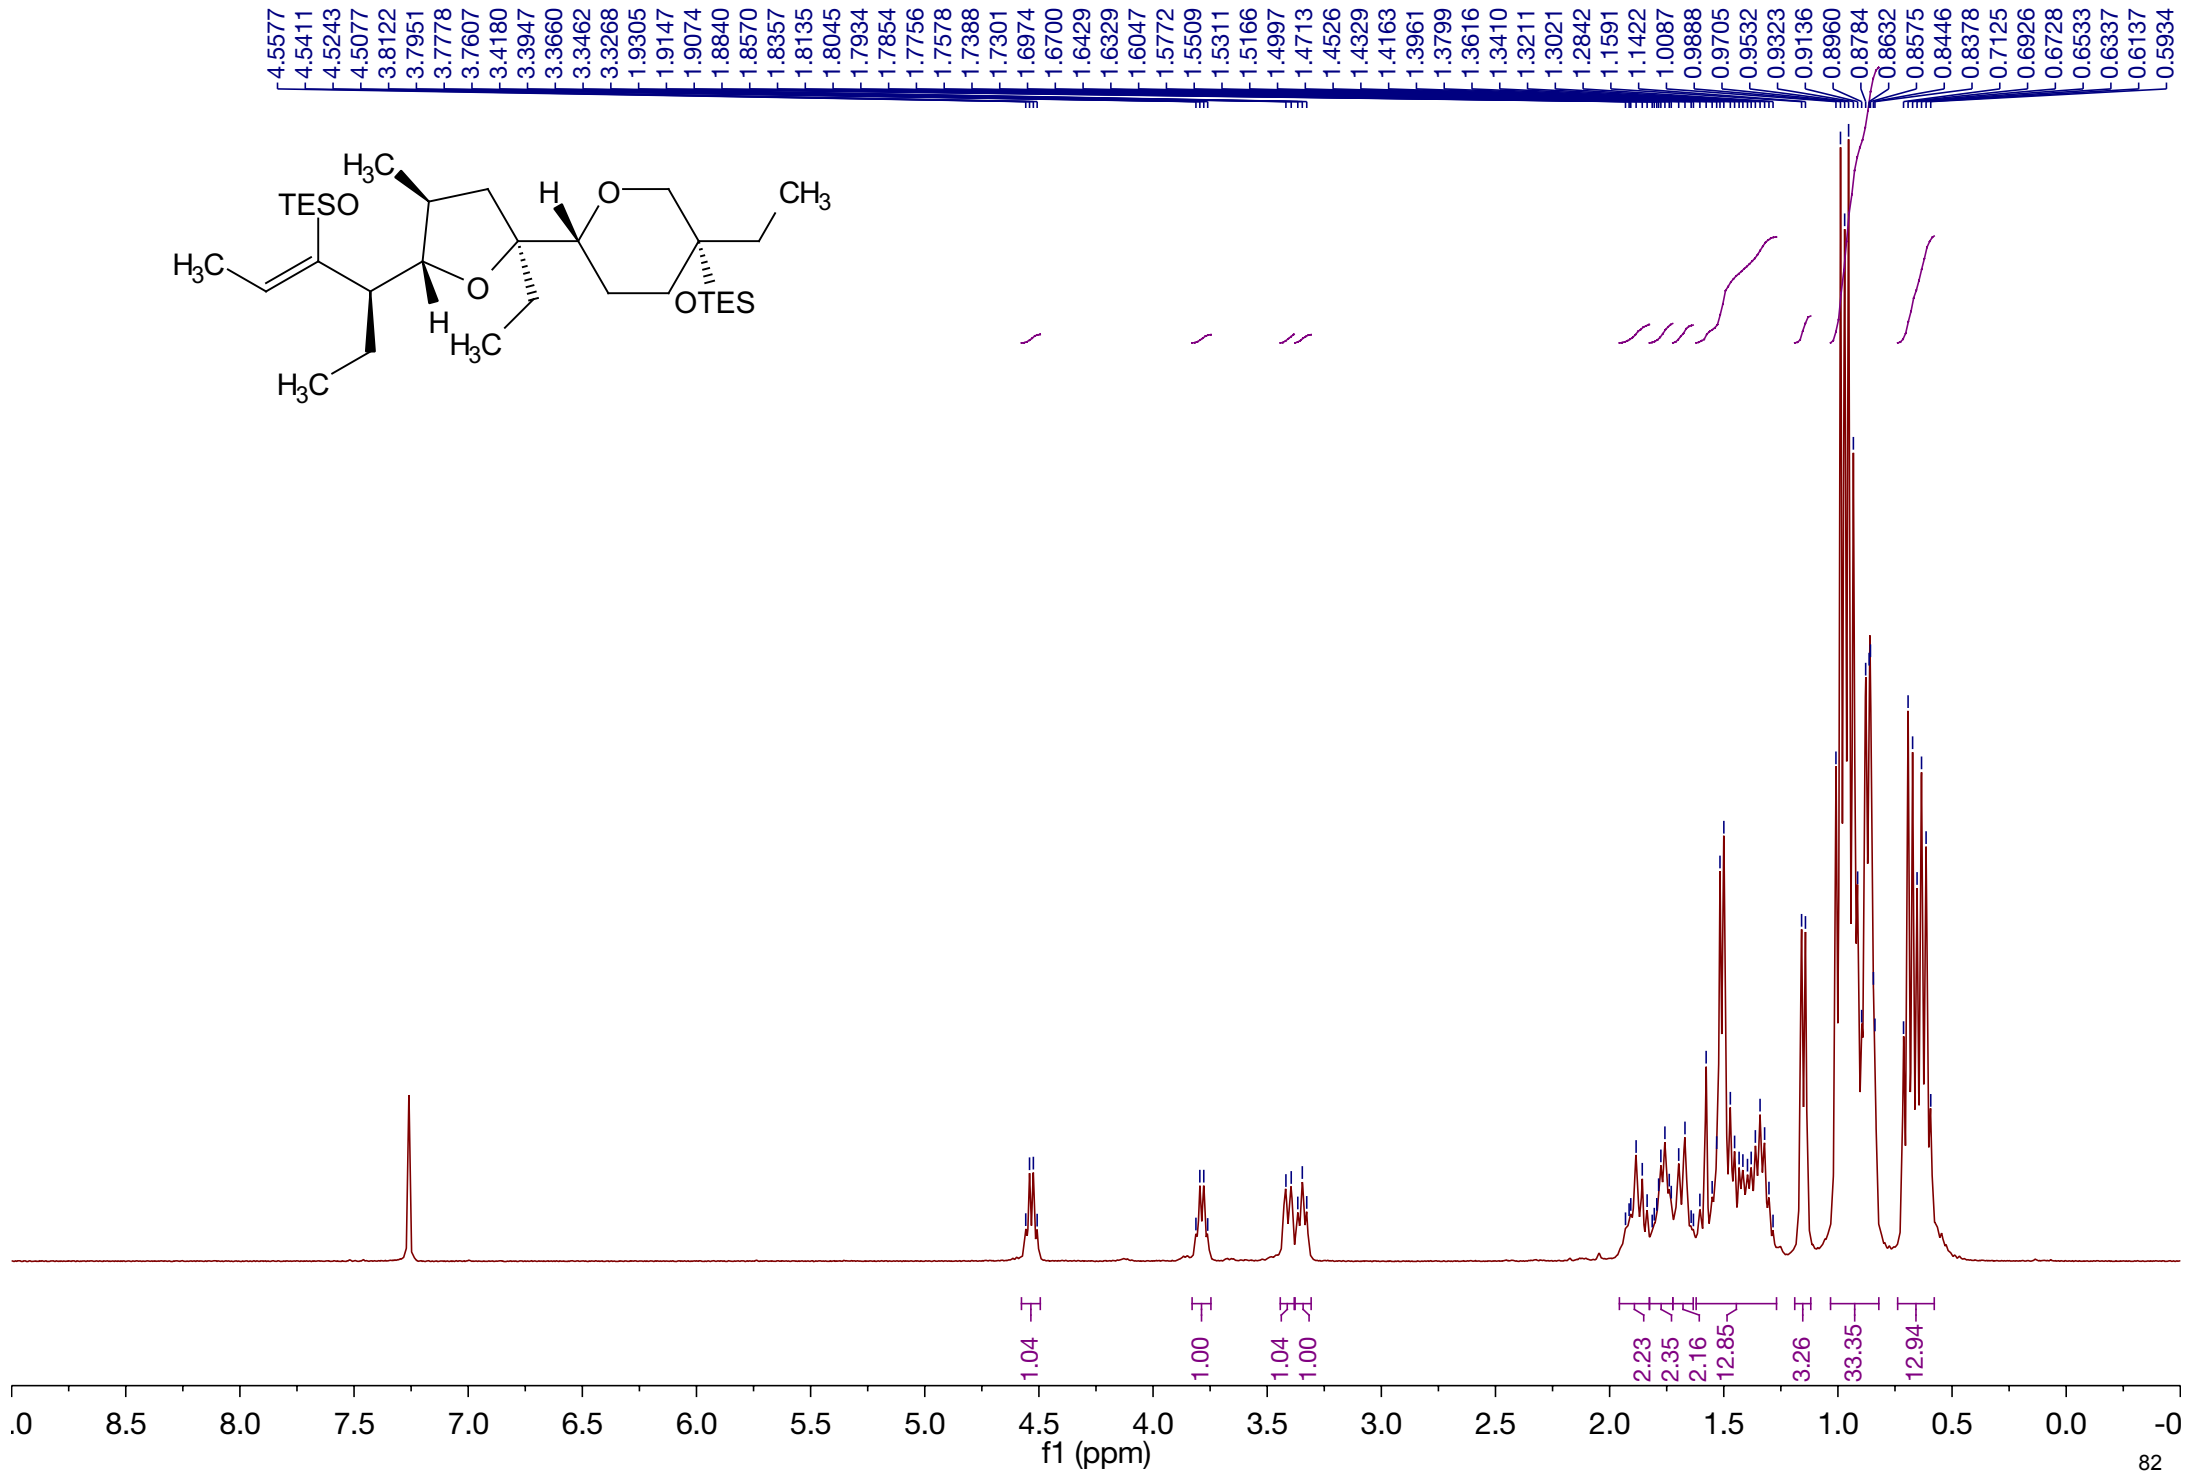

Compound 20a

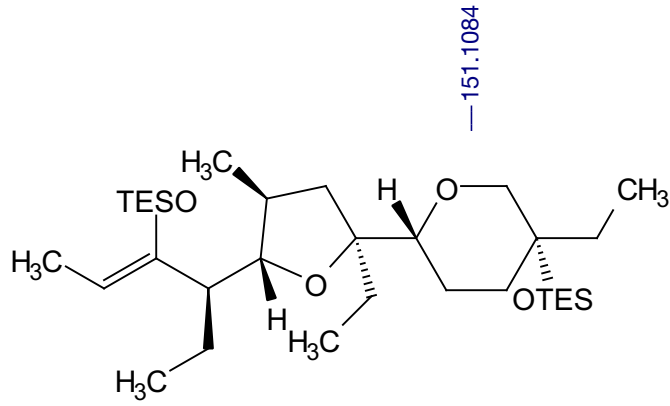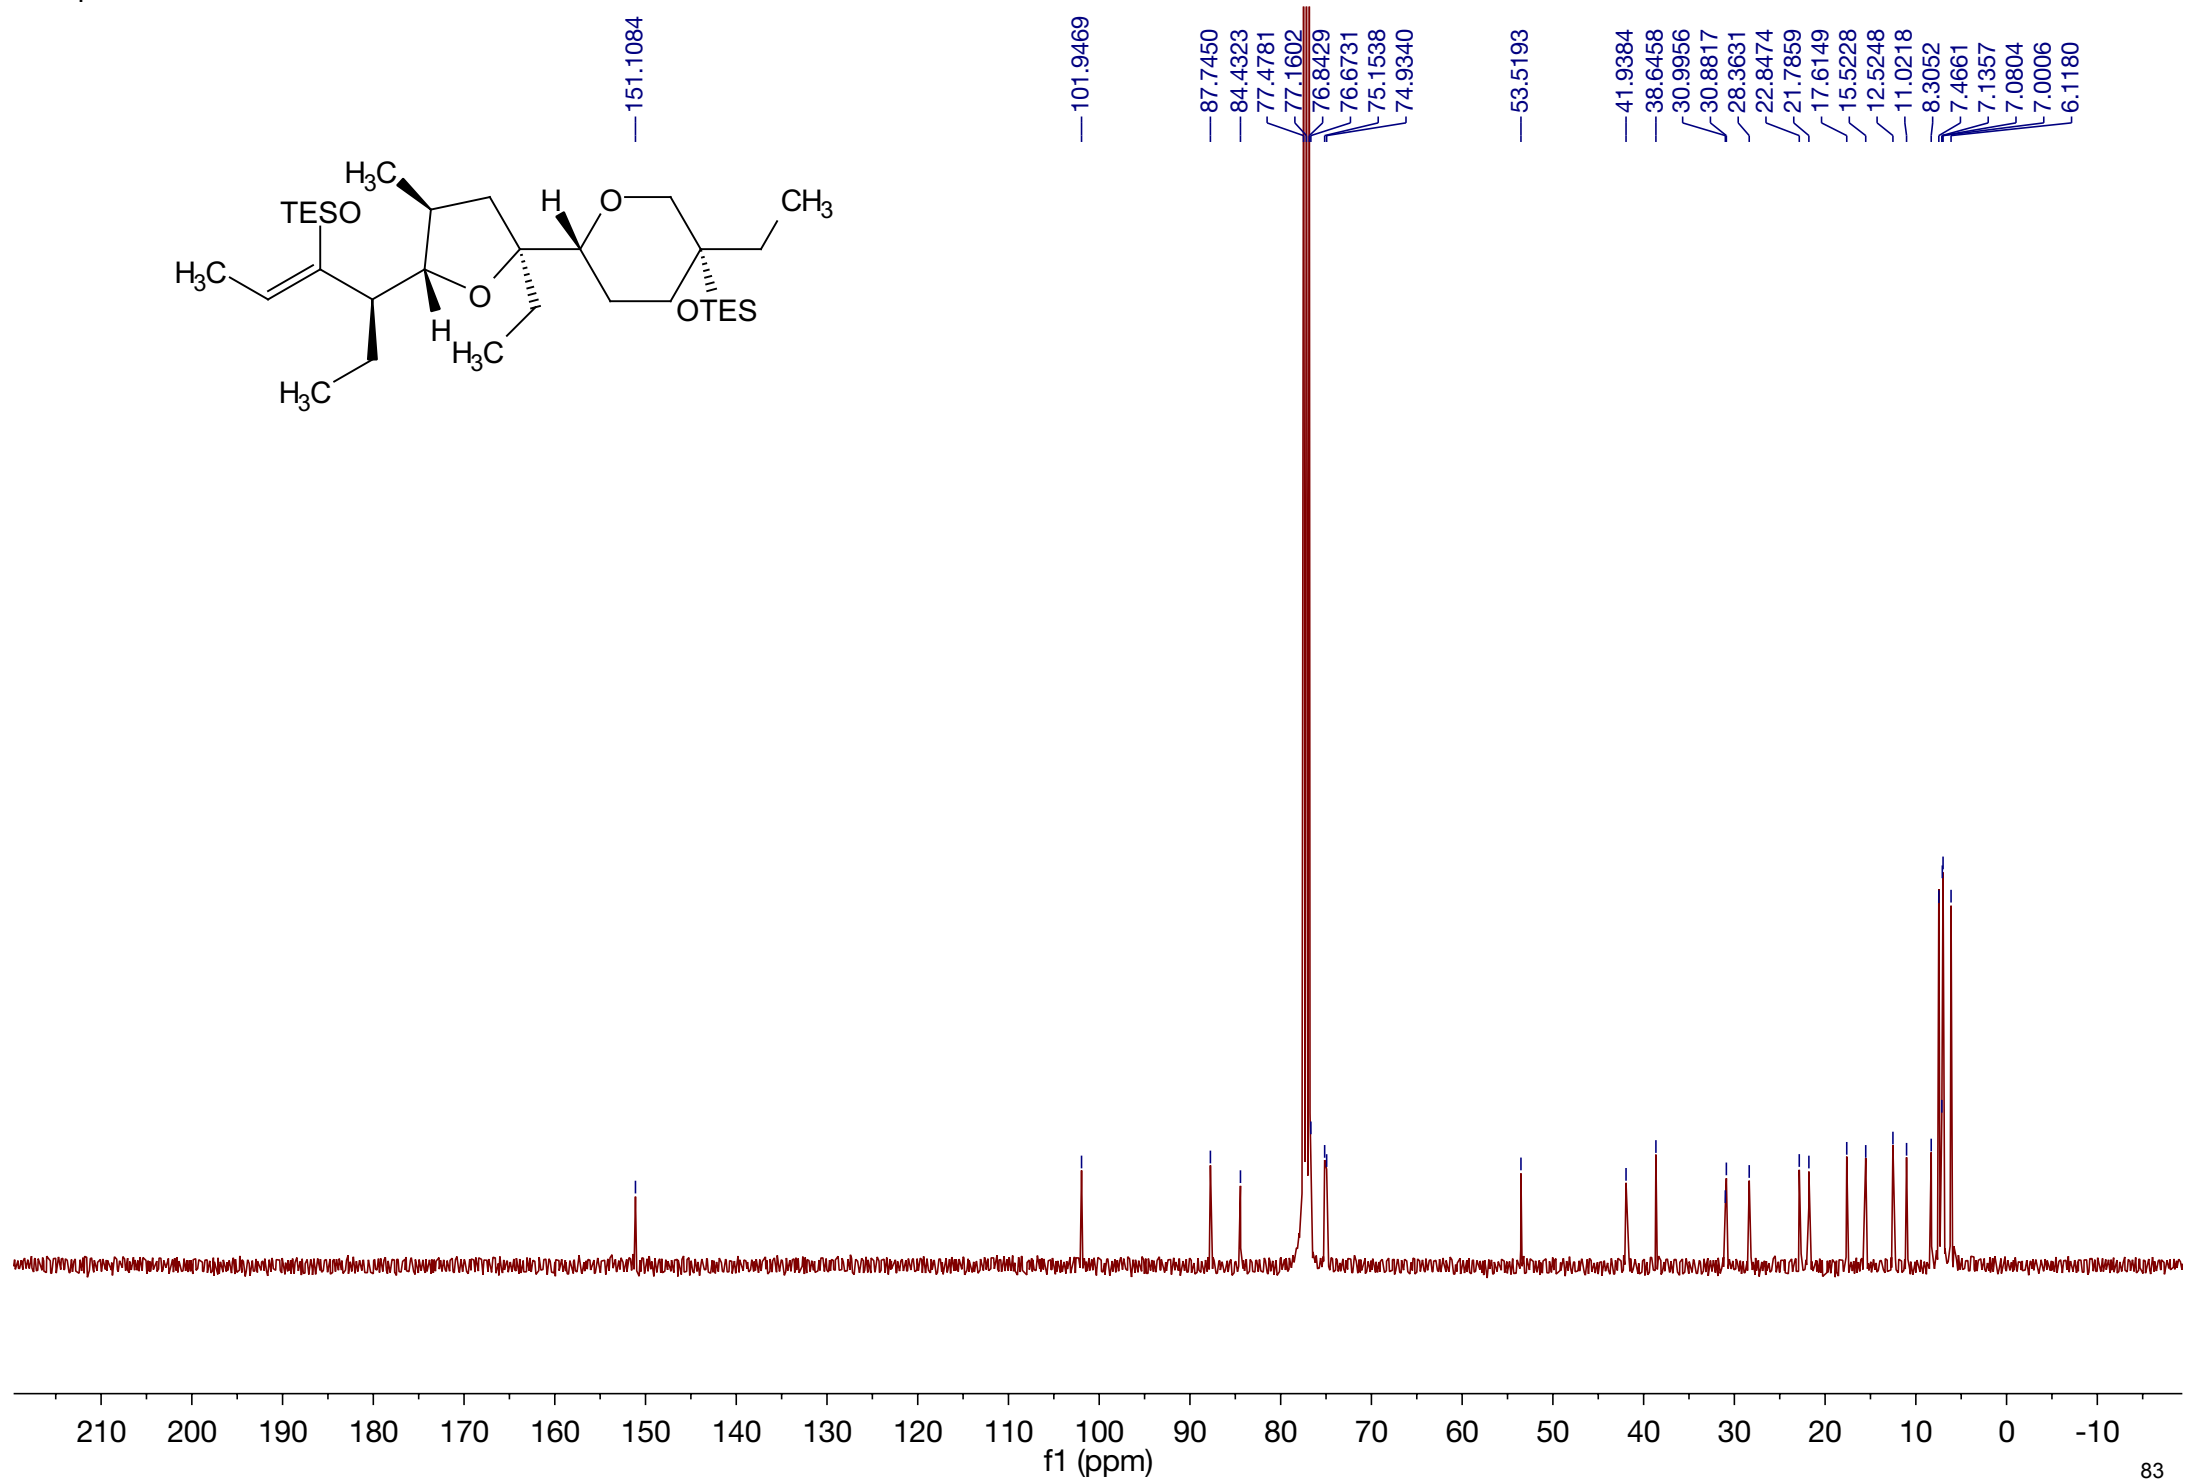

Compound 20a/20b=1:2.3

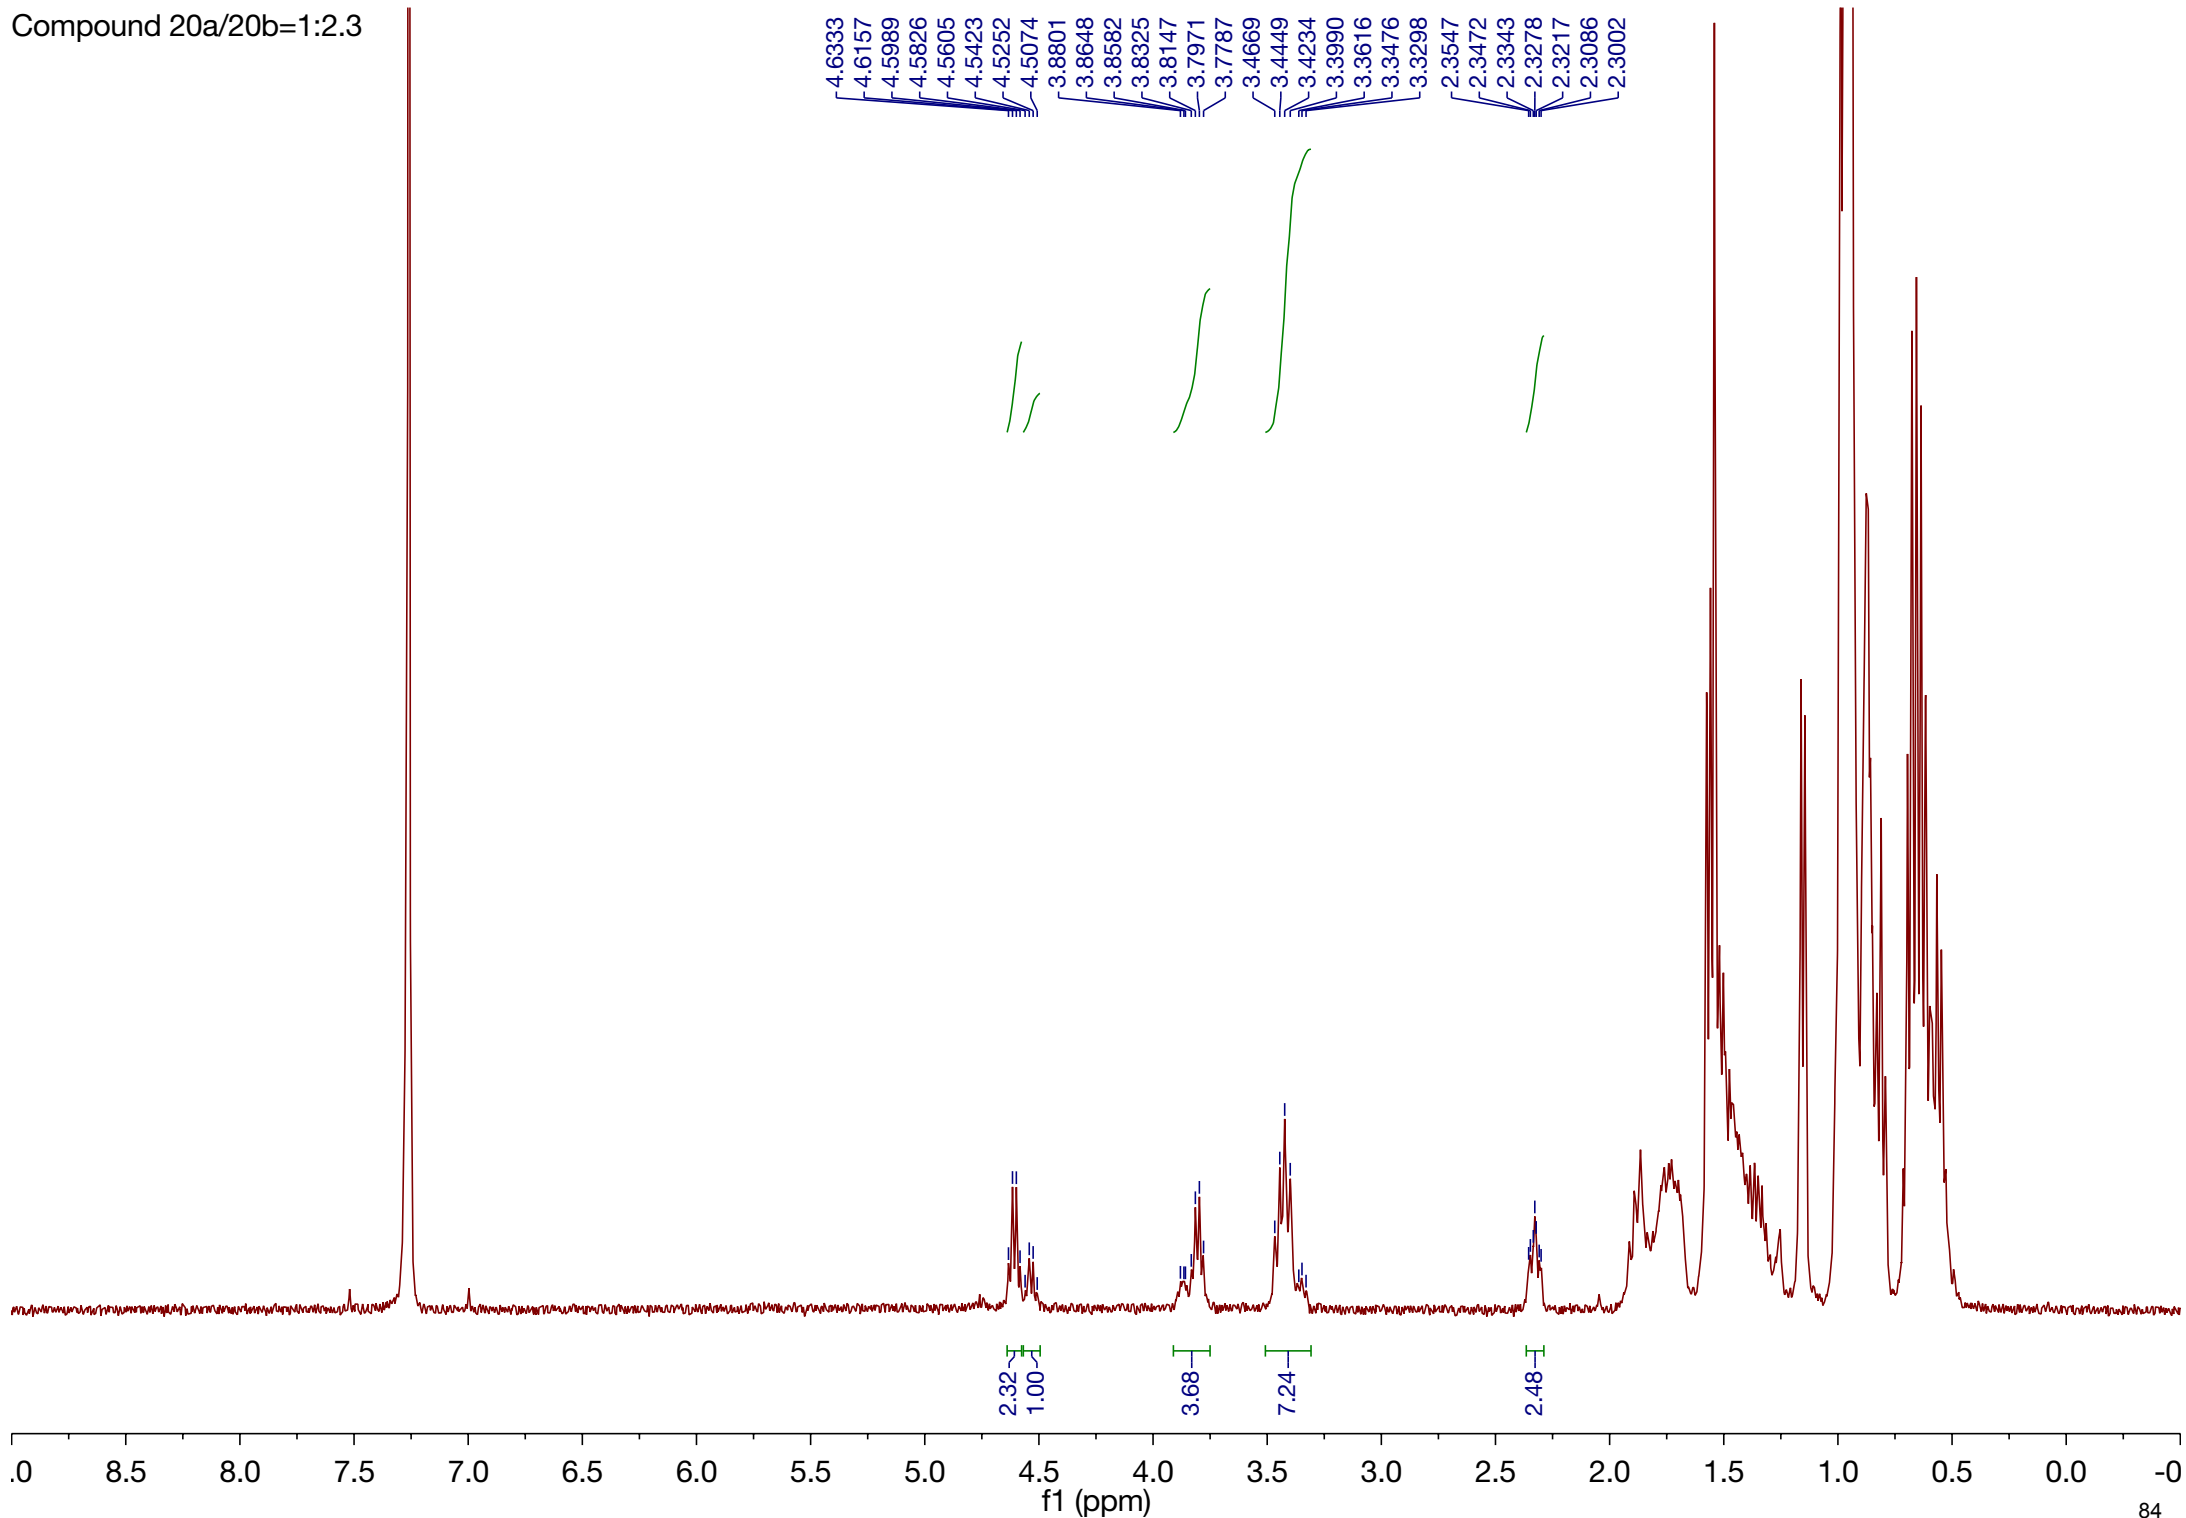

Compound 22

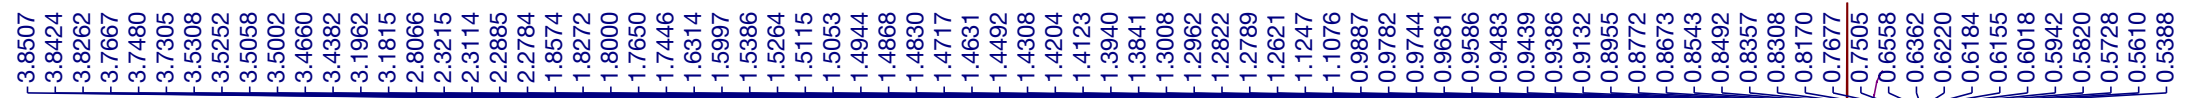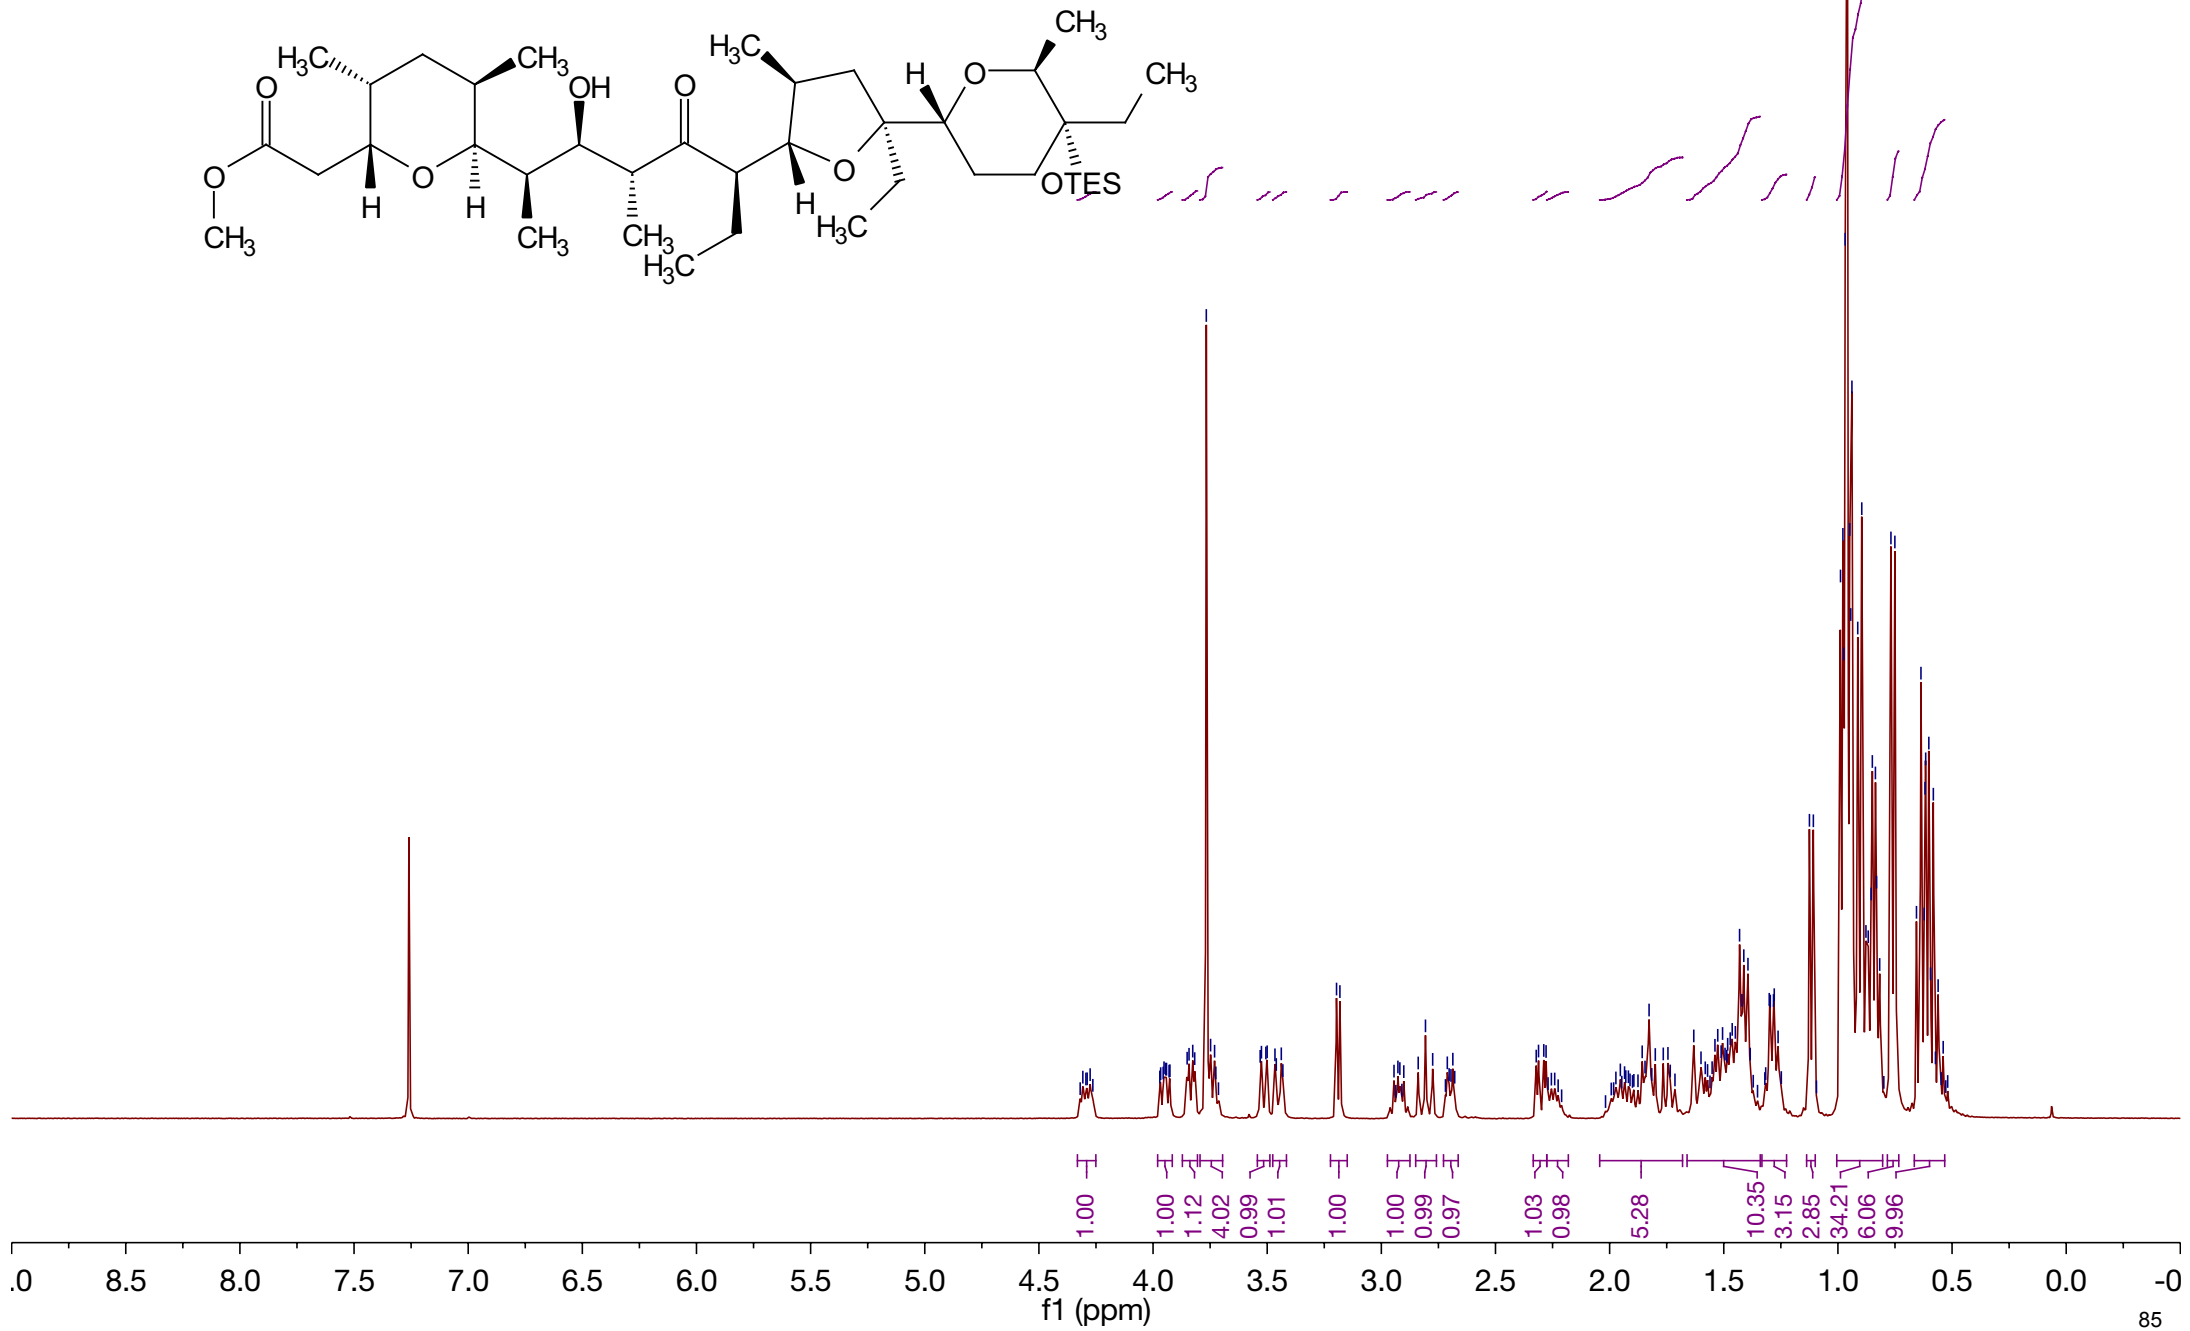

Compound 22

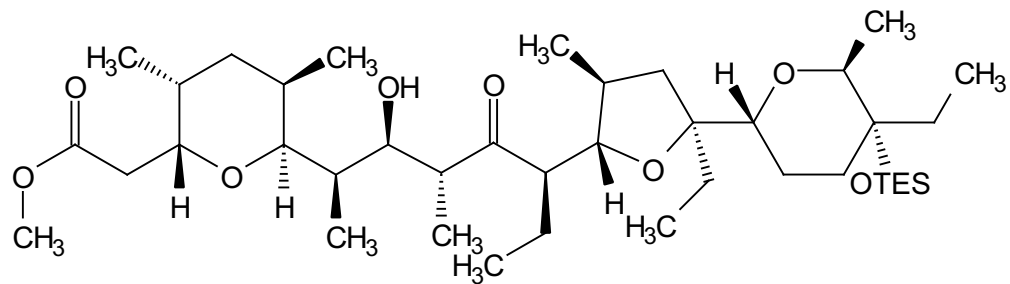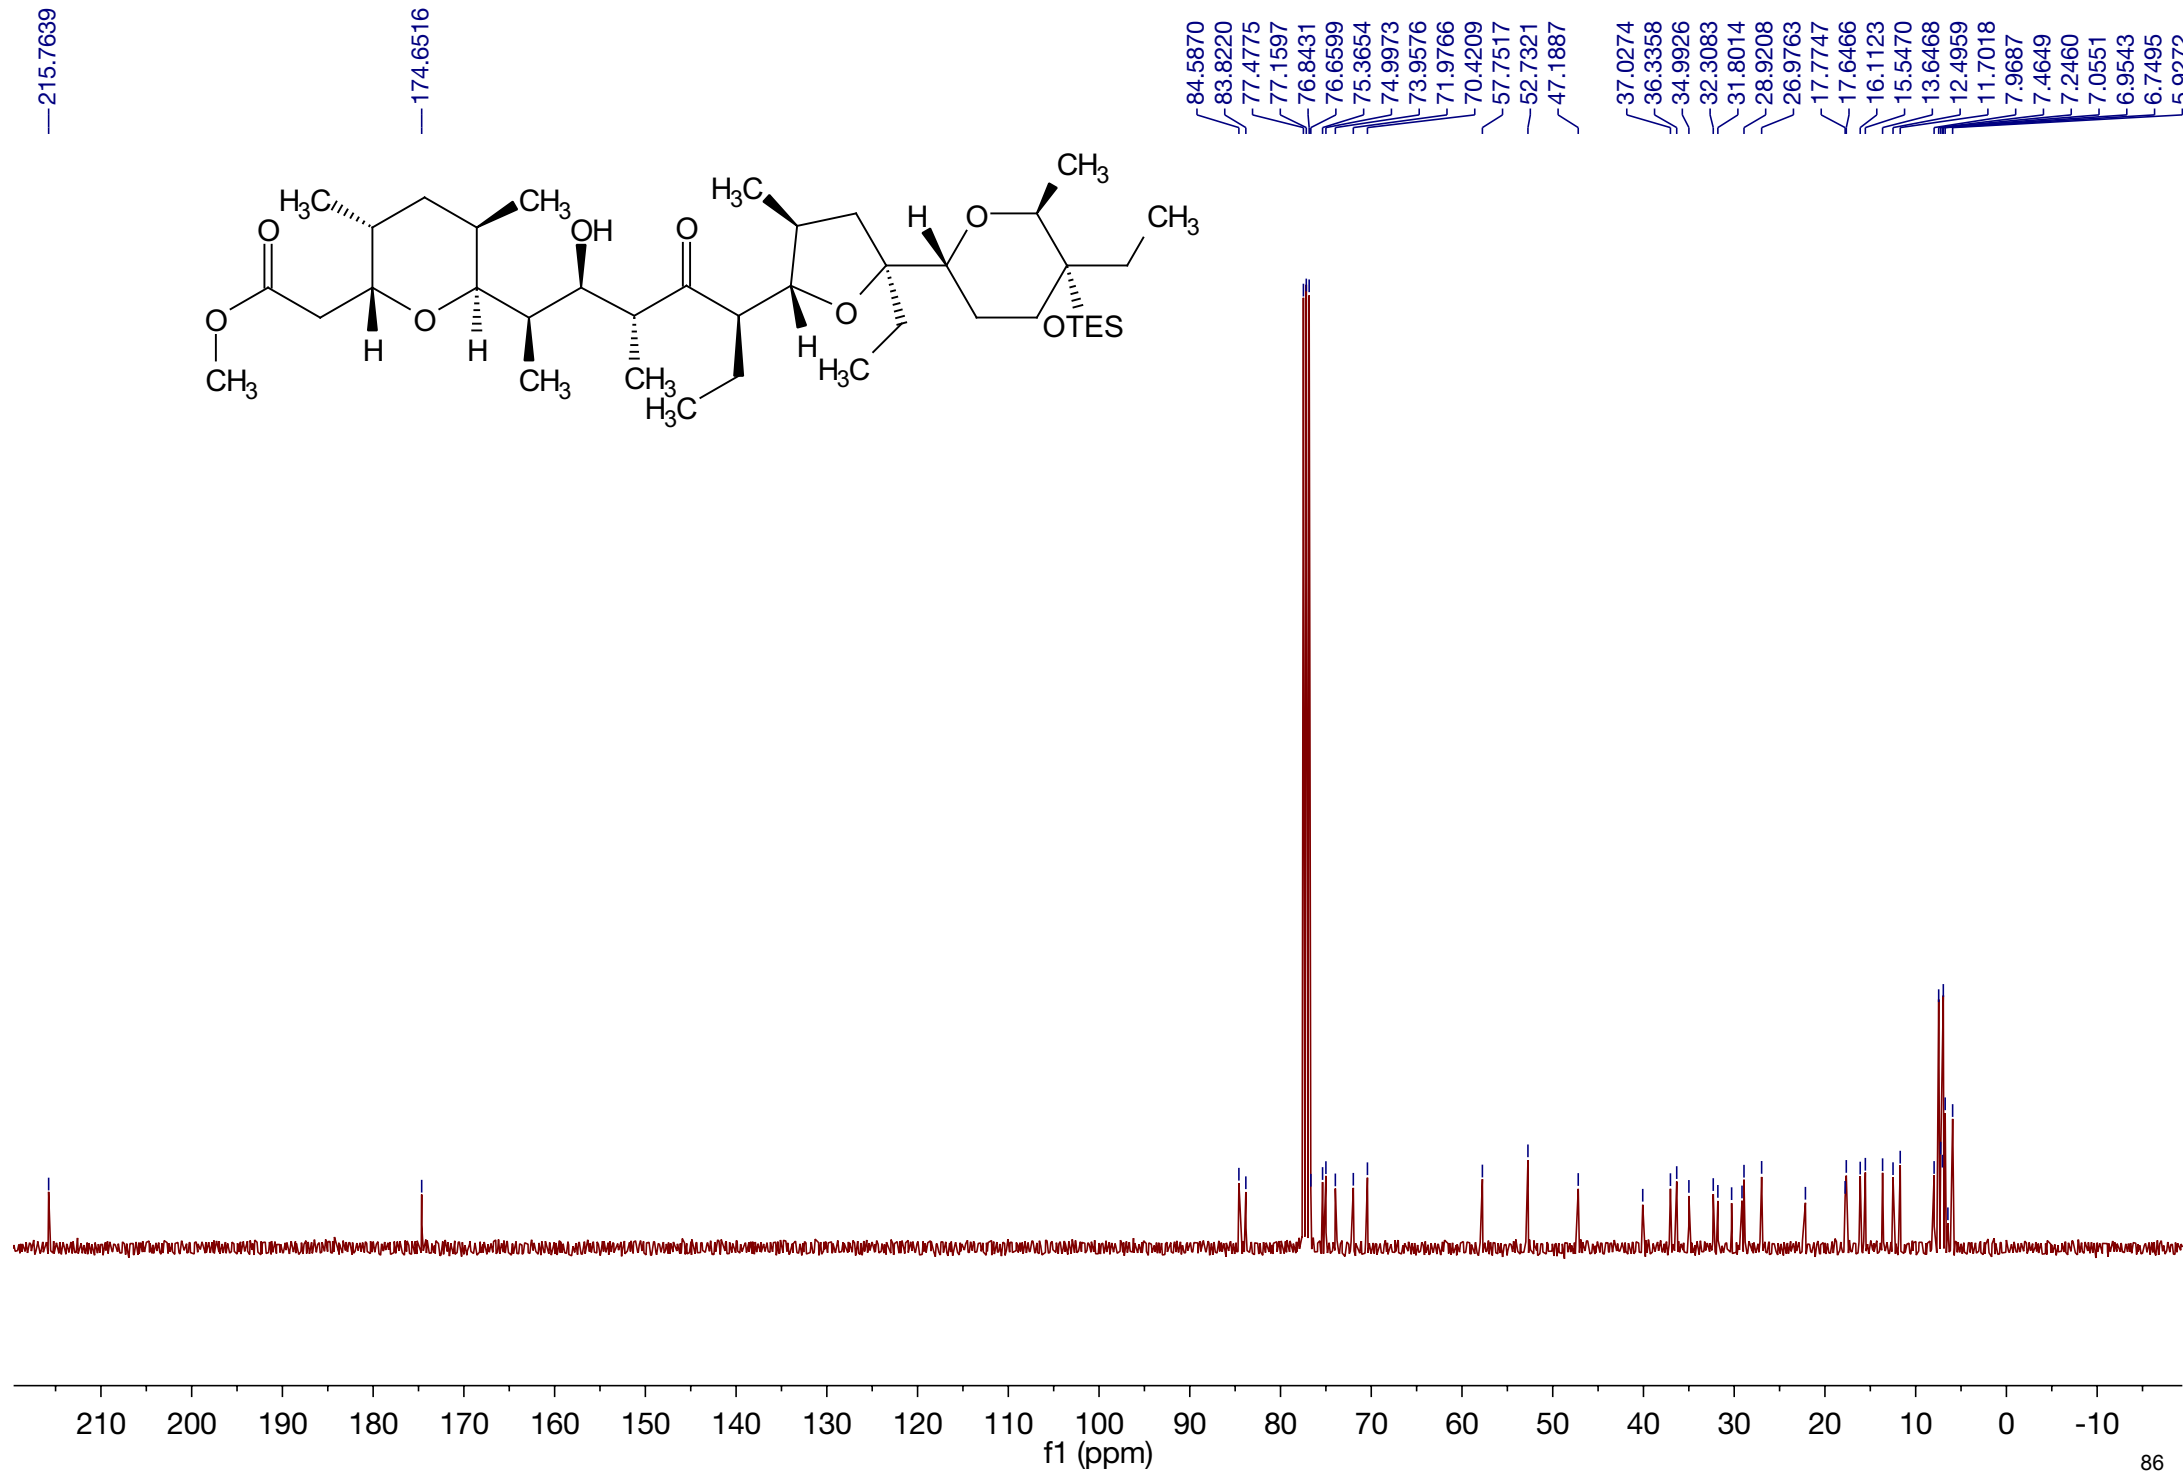

# Compound 23

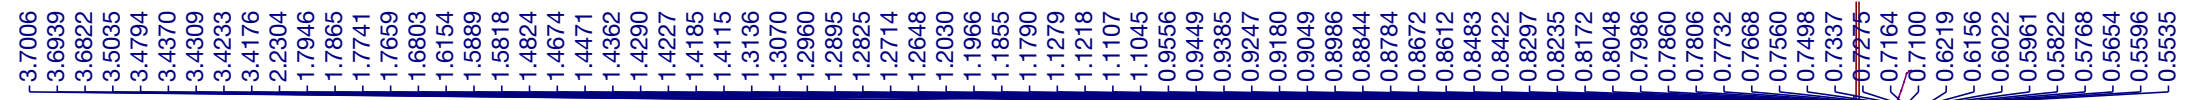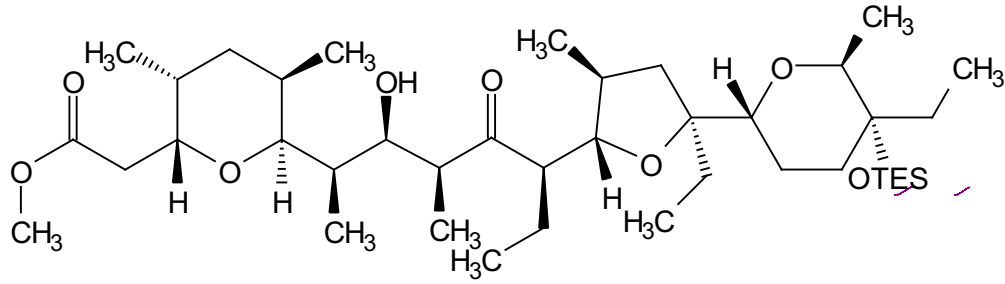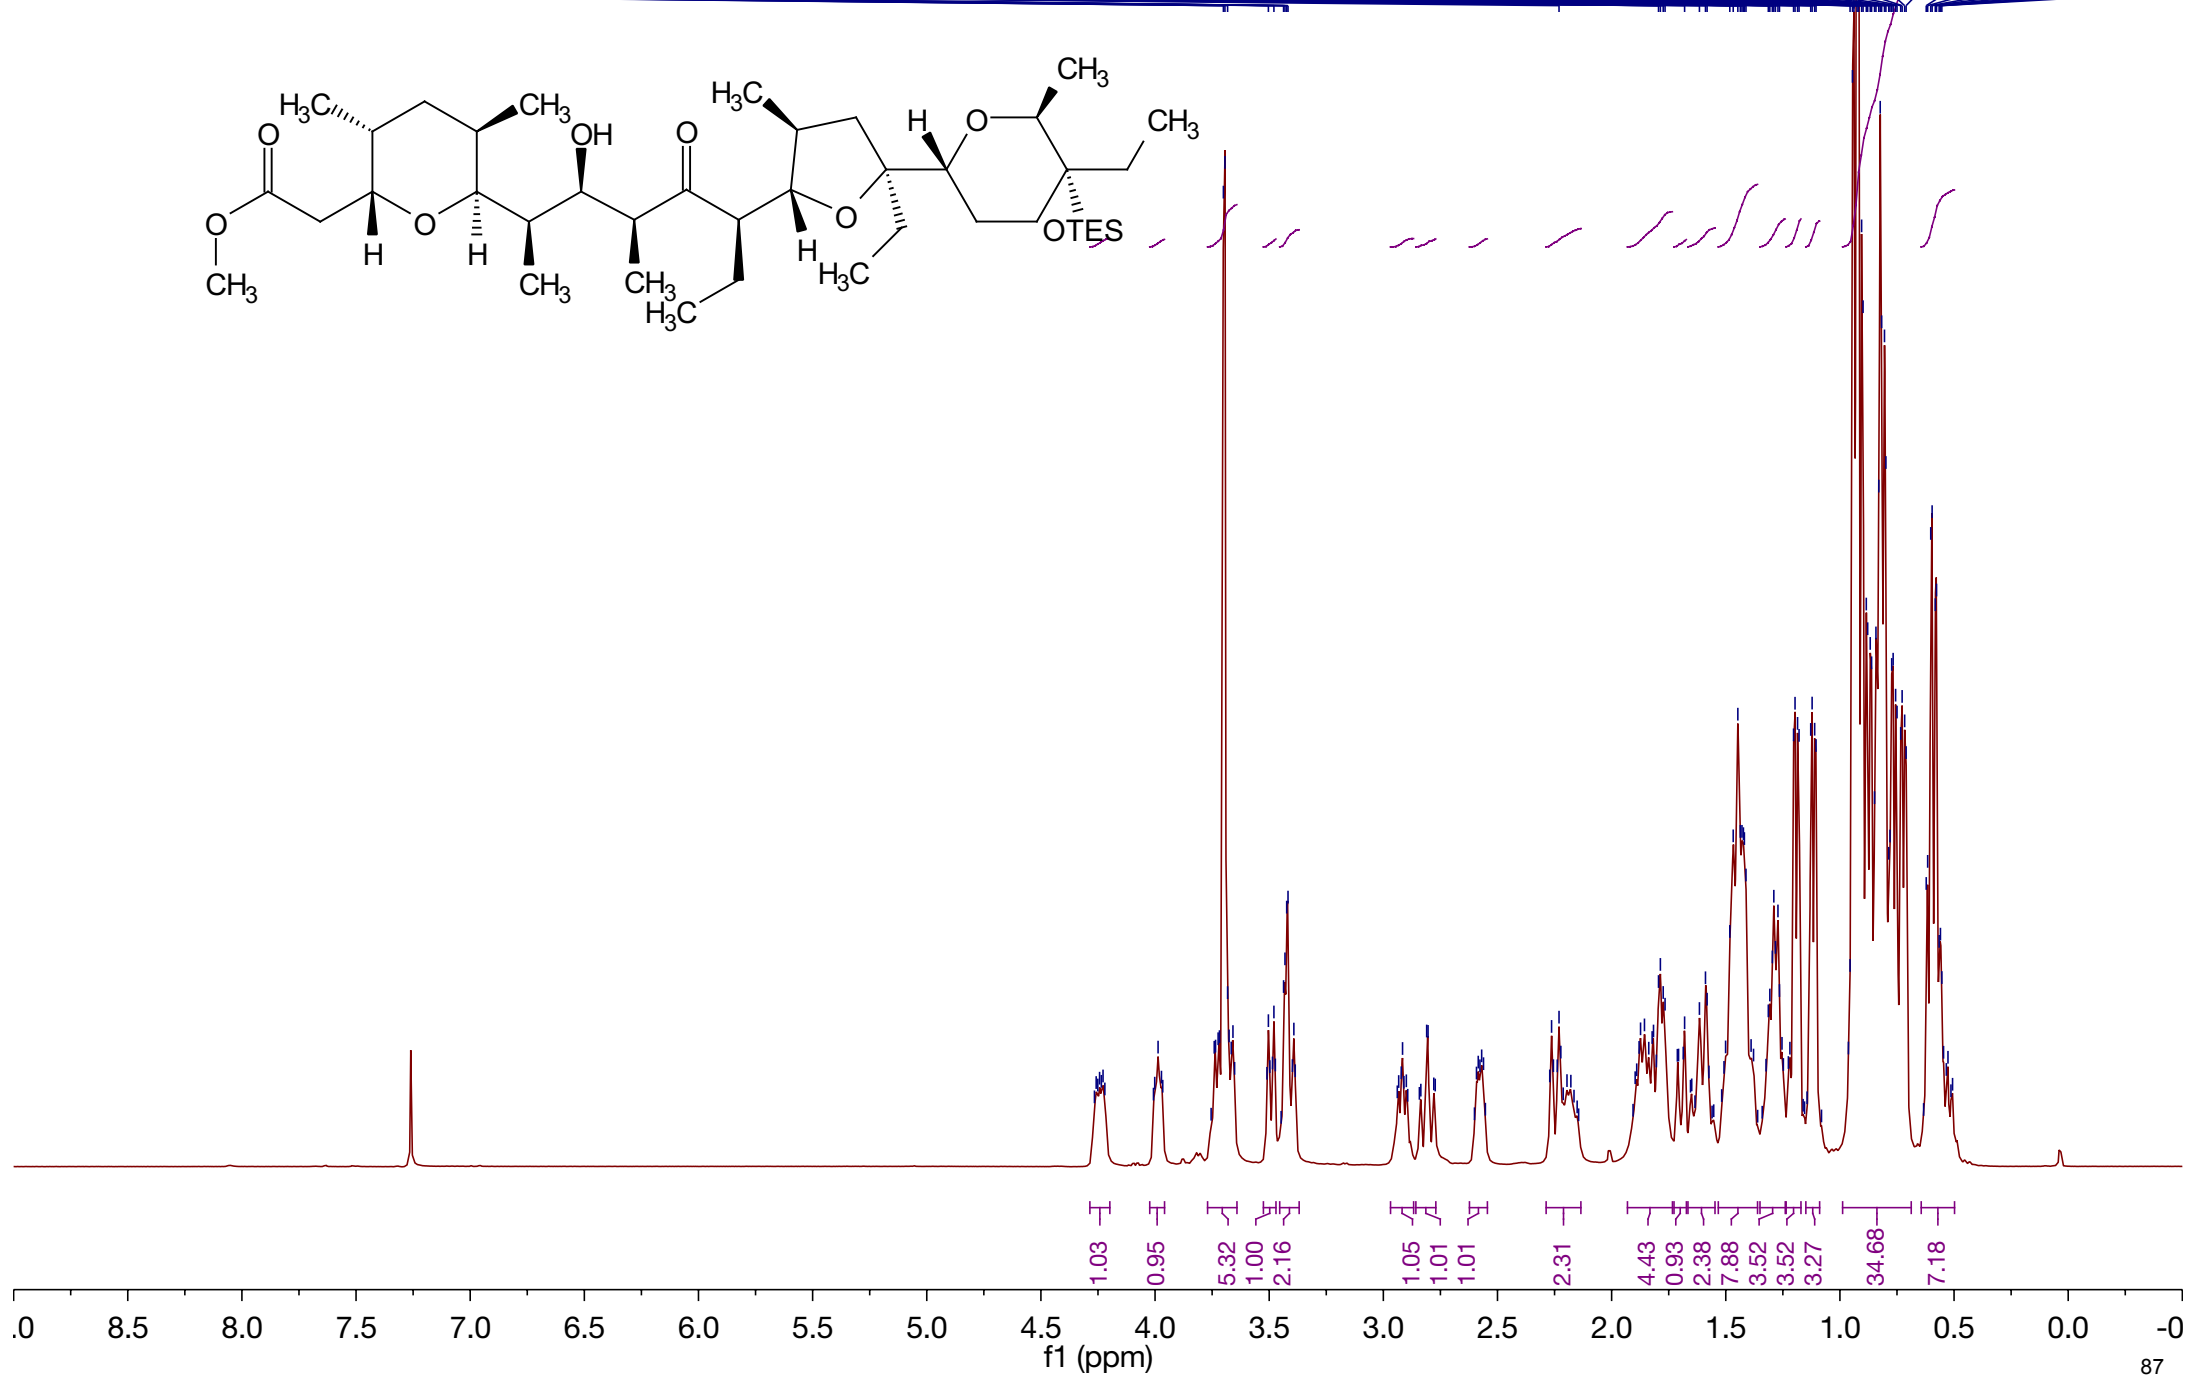

Compound 23

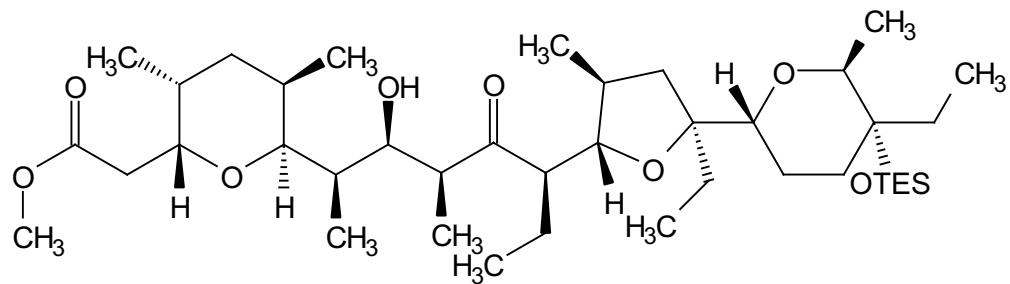

— 215.0843

— 174.4631

84.8977  
 83.9030  
 77.4793  
 77.1600  
 76.8420  
 76.6815  
 75.2290  
 74.9599  
 73.8825  
 71.2776  
 69.4293  
 55.7100  
 52.2223  
 48.1714  
 40.9319  
 37.8829  
 37.6167  
 35.0249  
 31.6105  
 31.5877  
 30.4429  
 28.9318  
 26.9562  
 18.8938  
 17.6677  
 16.7527  
 15.5302  
 15.4030  
 12.2511  
 11.7770  
 8.6186  
 8.0872  
 7.3884  
 6.9821  
 6.8700

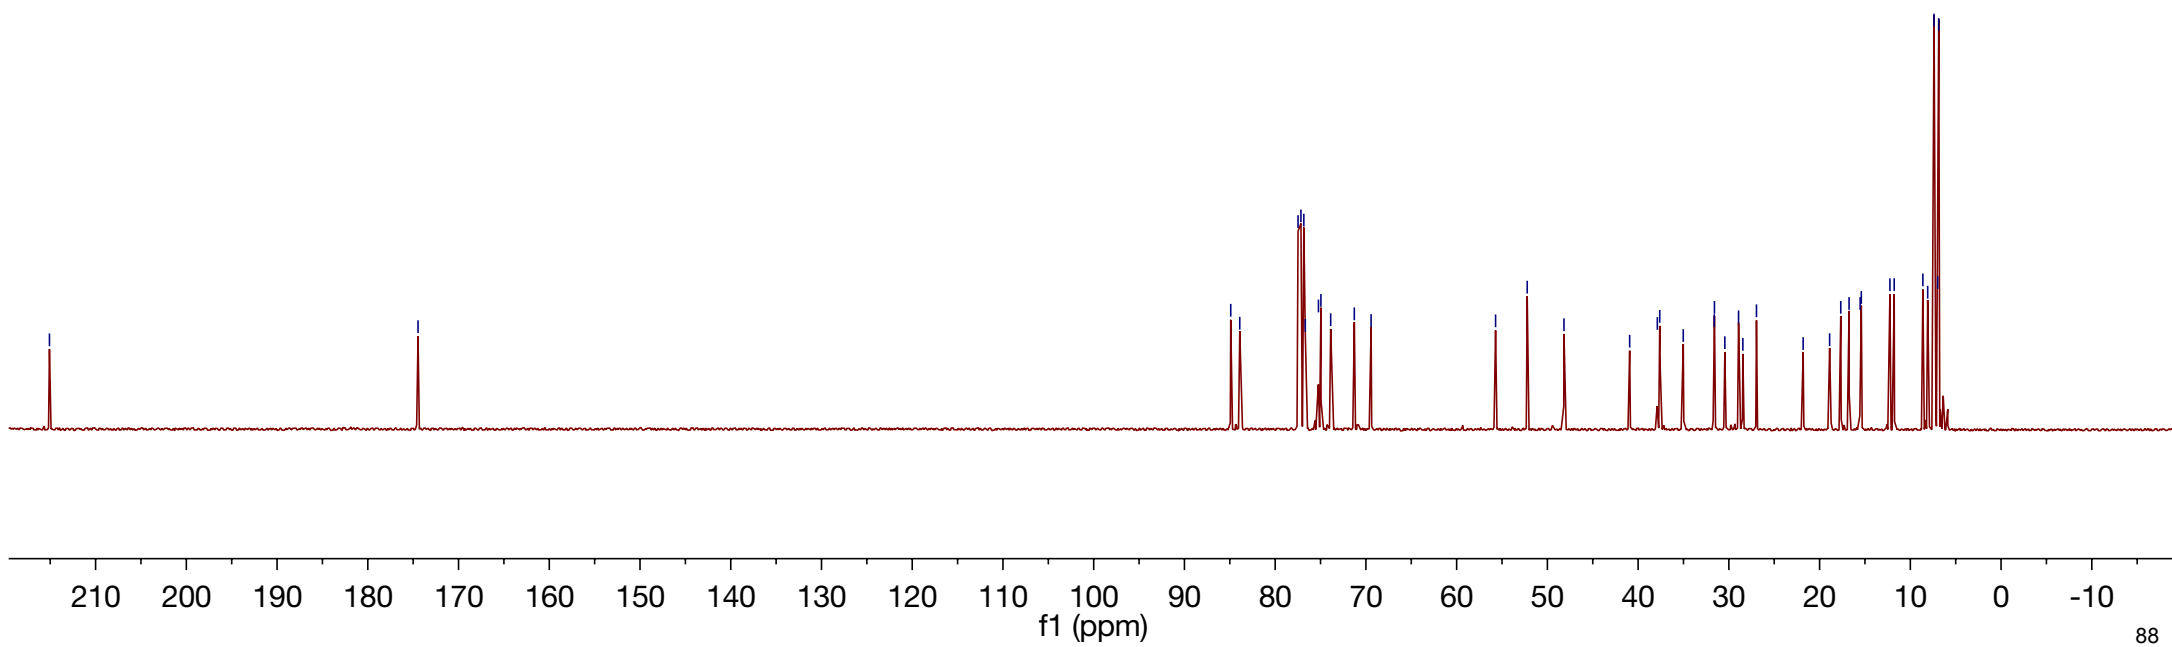



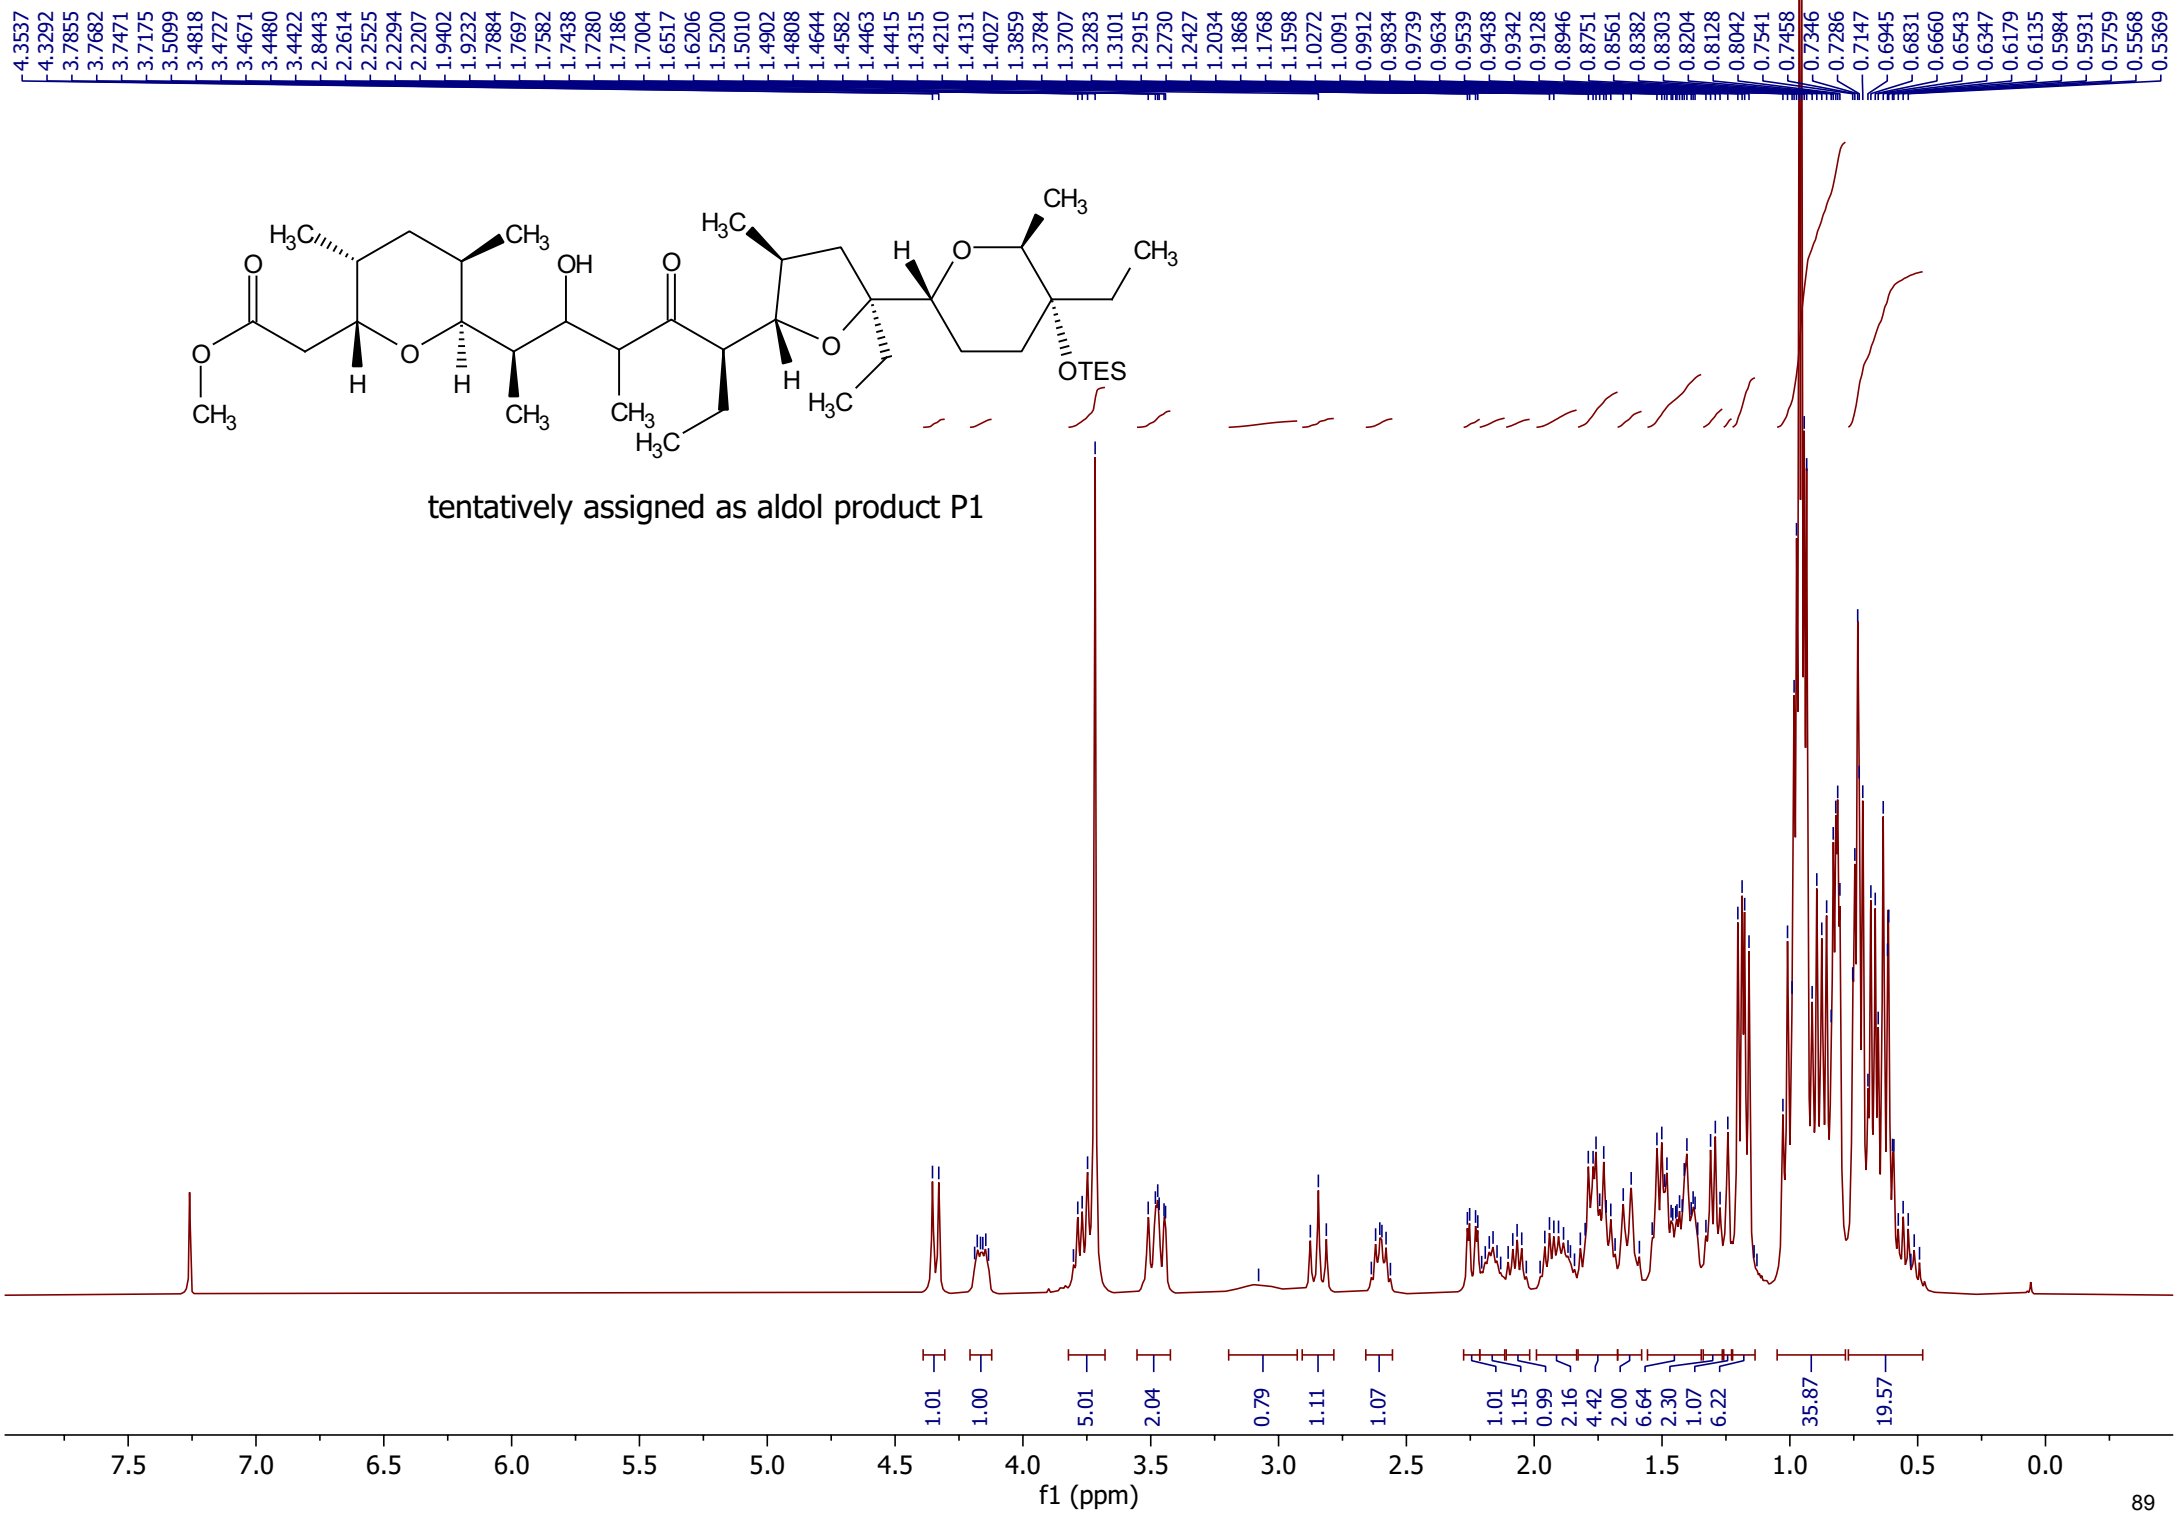

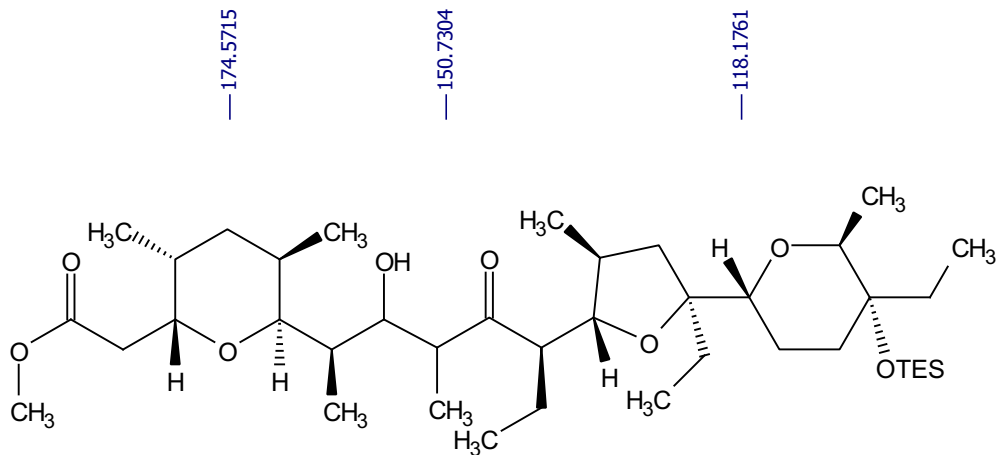

tentatively assigned as aldol product P1

—174.5715

—150.7304

—118.1761

84.1920  
84.1648  
82.9152  
77.3180  
77.2019  
77.0007  
76.7965  
76.6825  
75.0572  
74.9401  
73.9444  
71.5082  
70.8732  
51.9965

40.9834  
38.5540  
38.2394  
36.5663  
35.0253  
31.9232  
31.6174  
30.5039  
28.7329  
26.9753  
21.8722  
19.4892  
17.6295  
17.6114  
16.2250  
15.3756  
15.3502  
11.6627  
8.0813  
7.7796  
7.3018  
6.8559  
6.8205  
6.7836  
5.4676

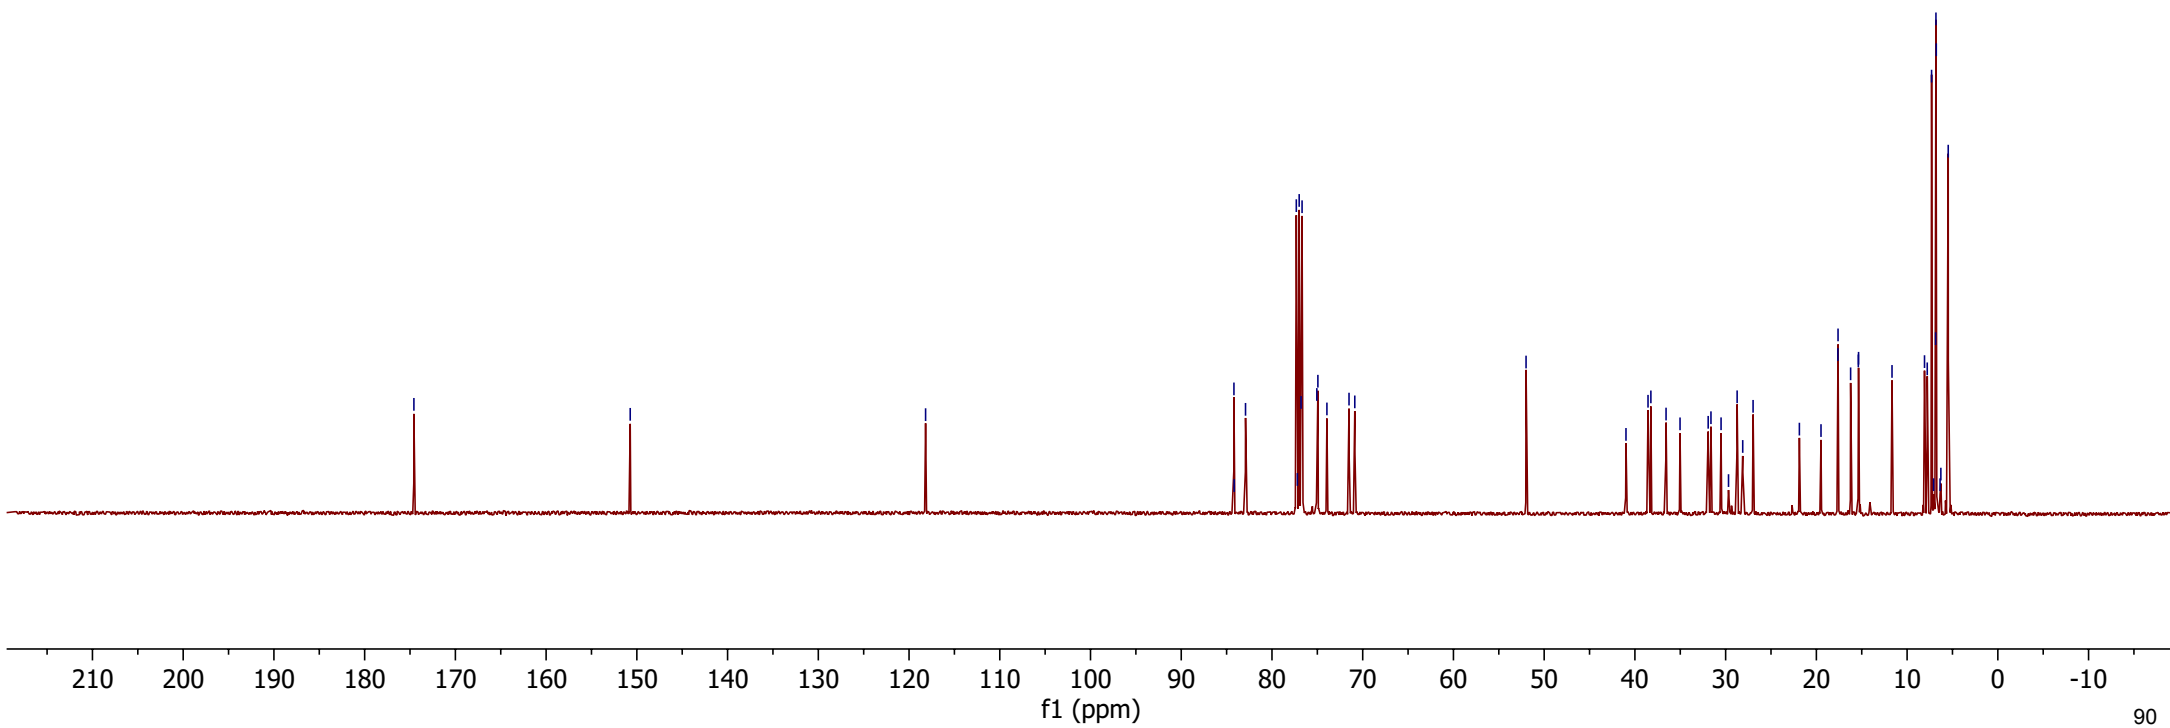

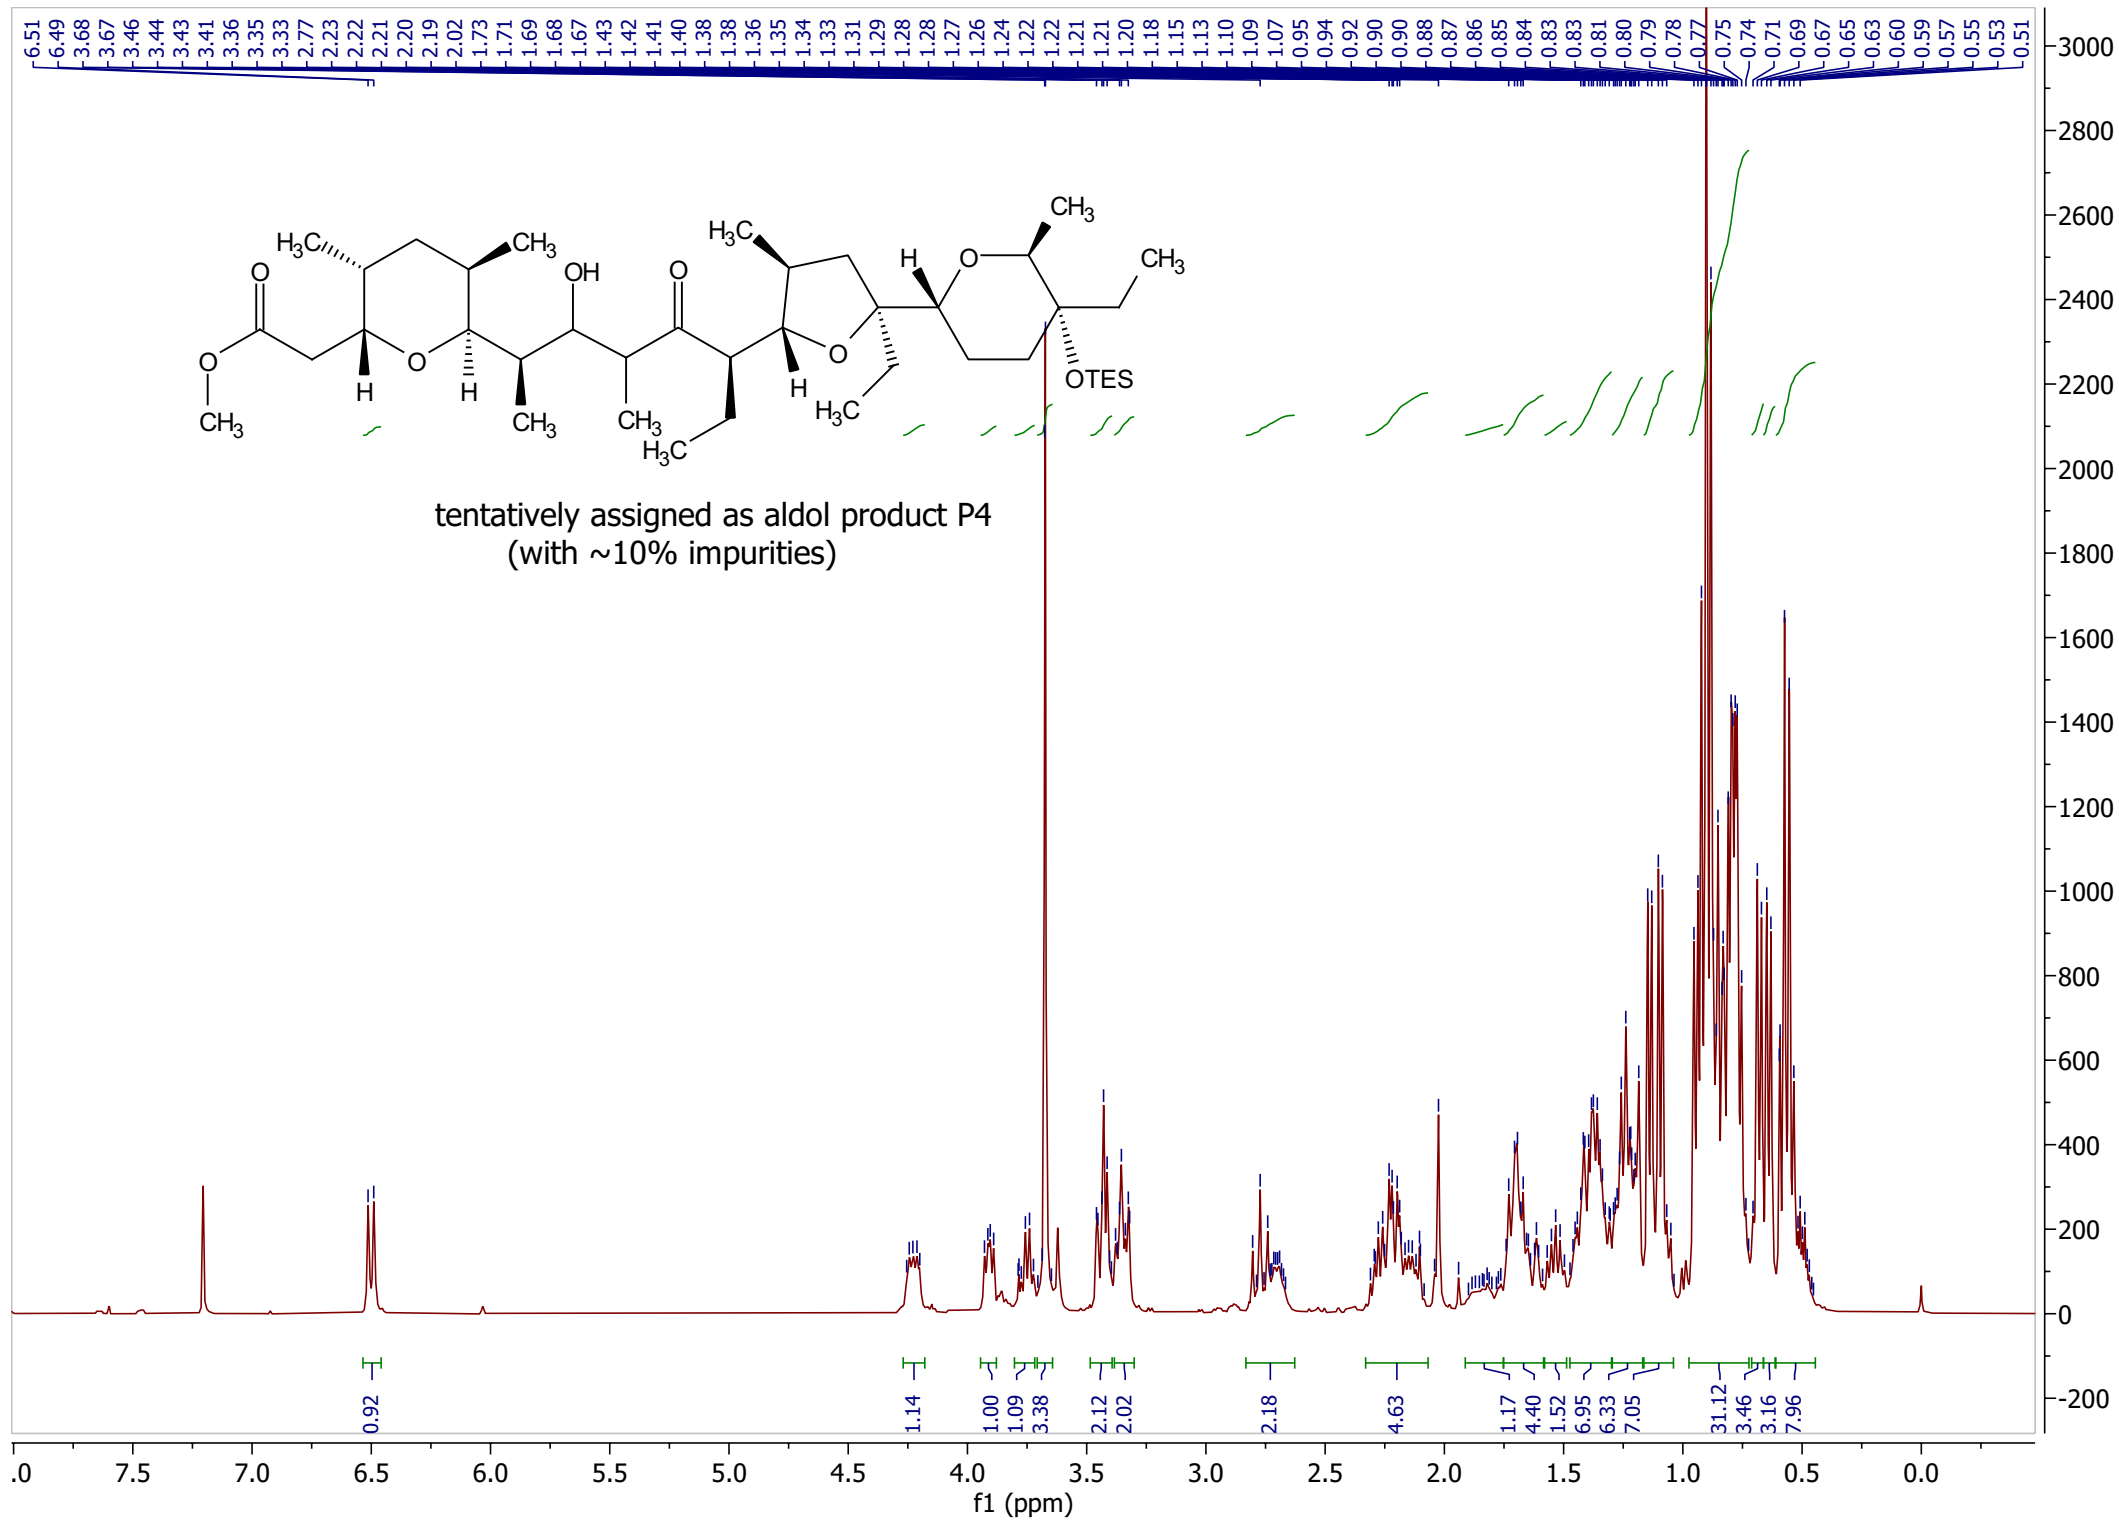

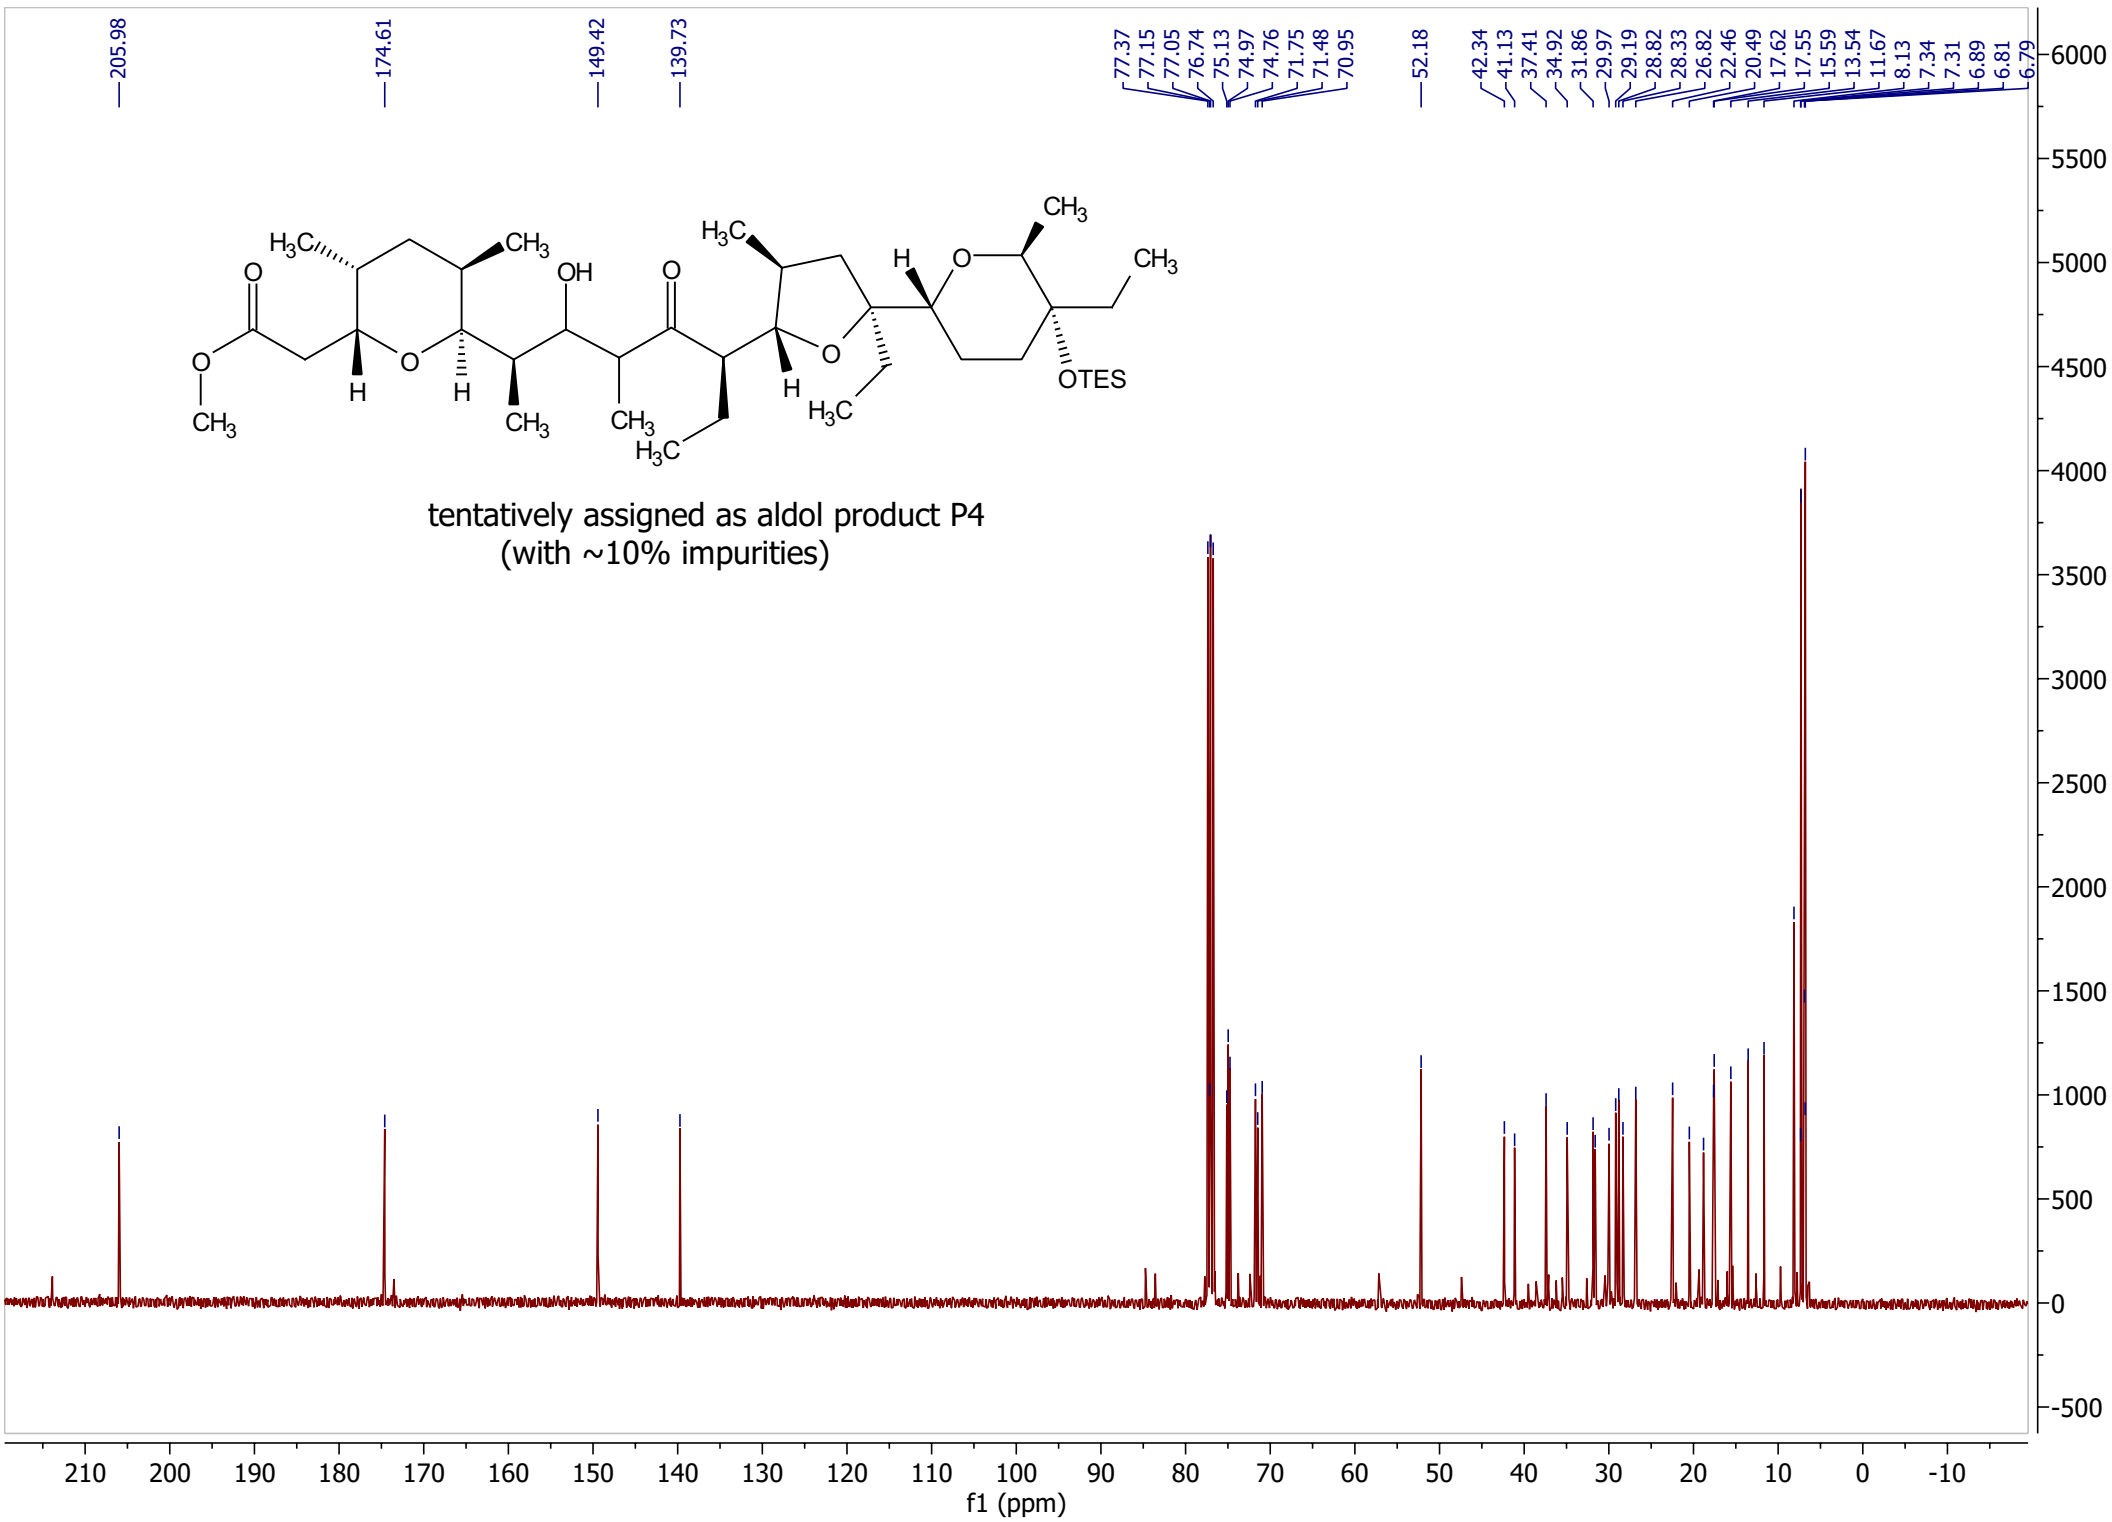

Compound 24

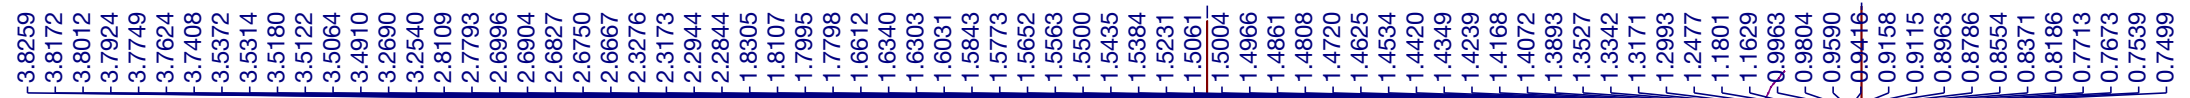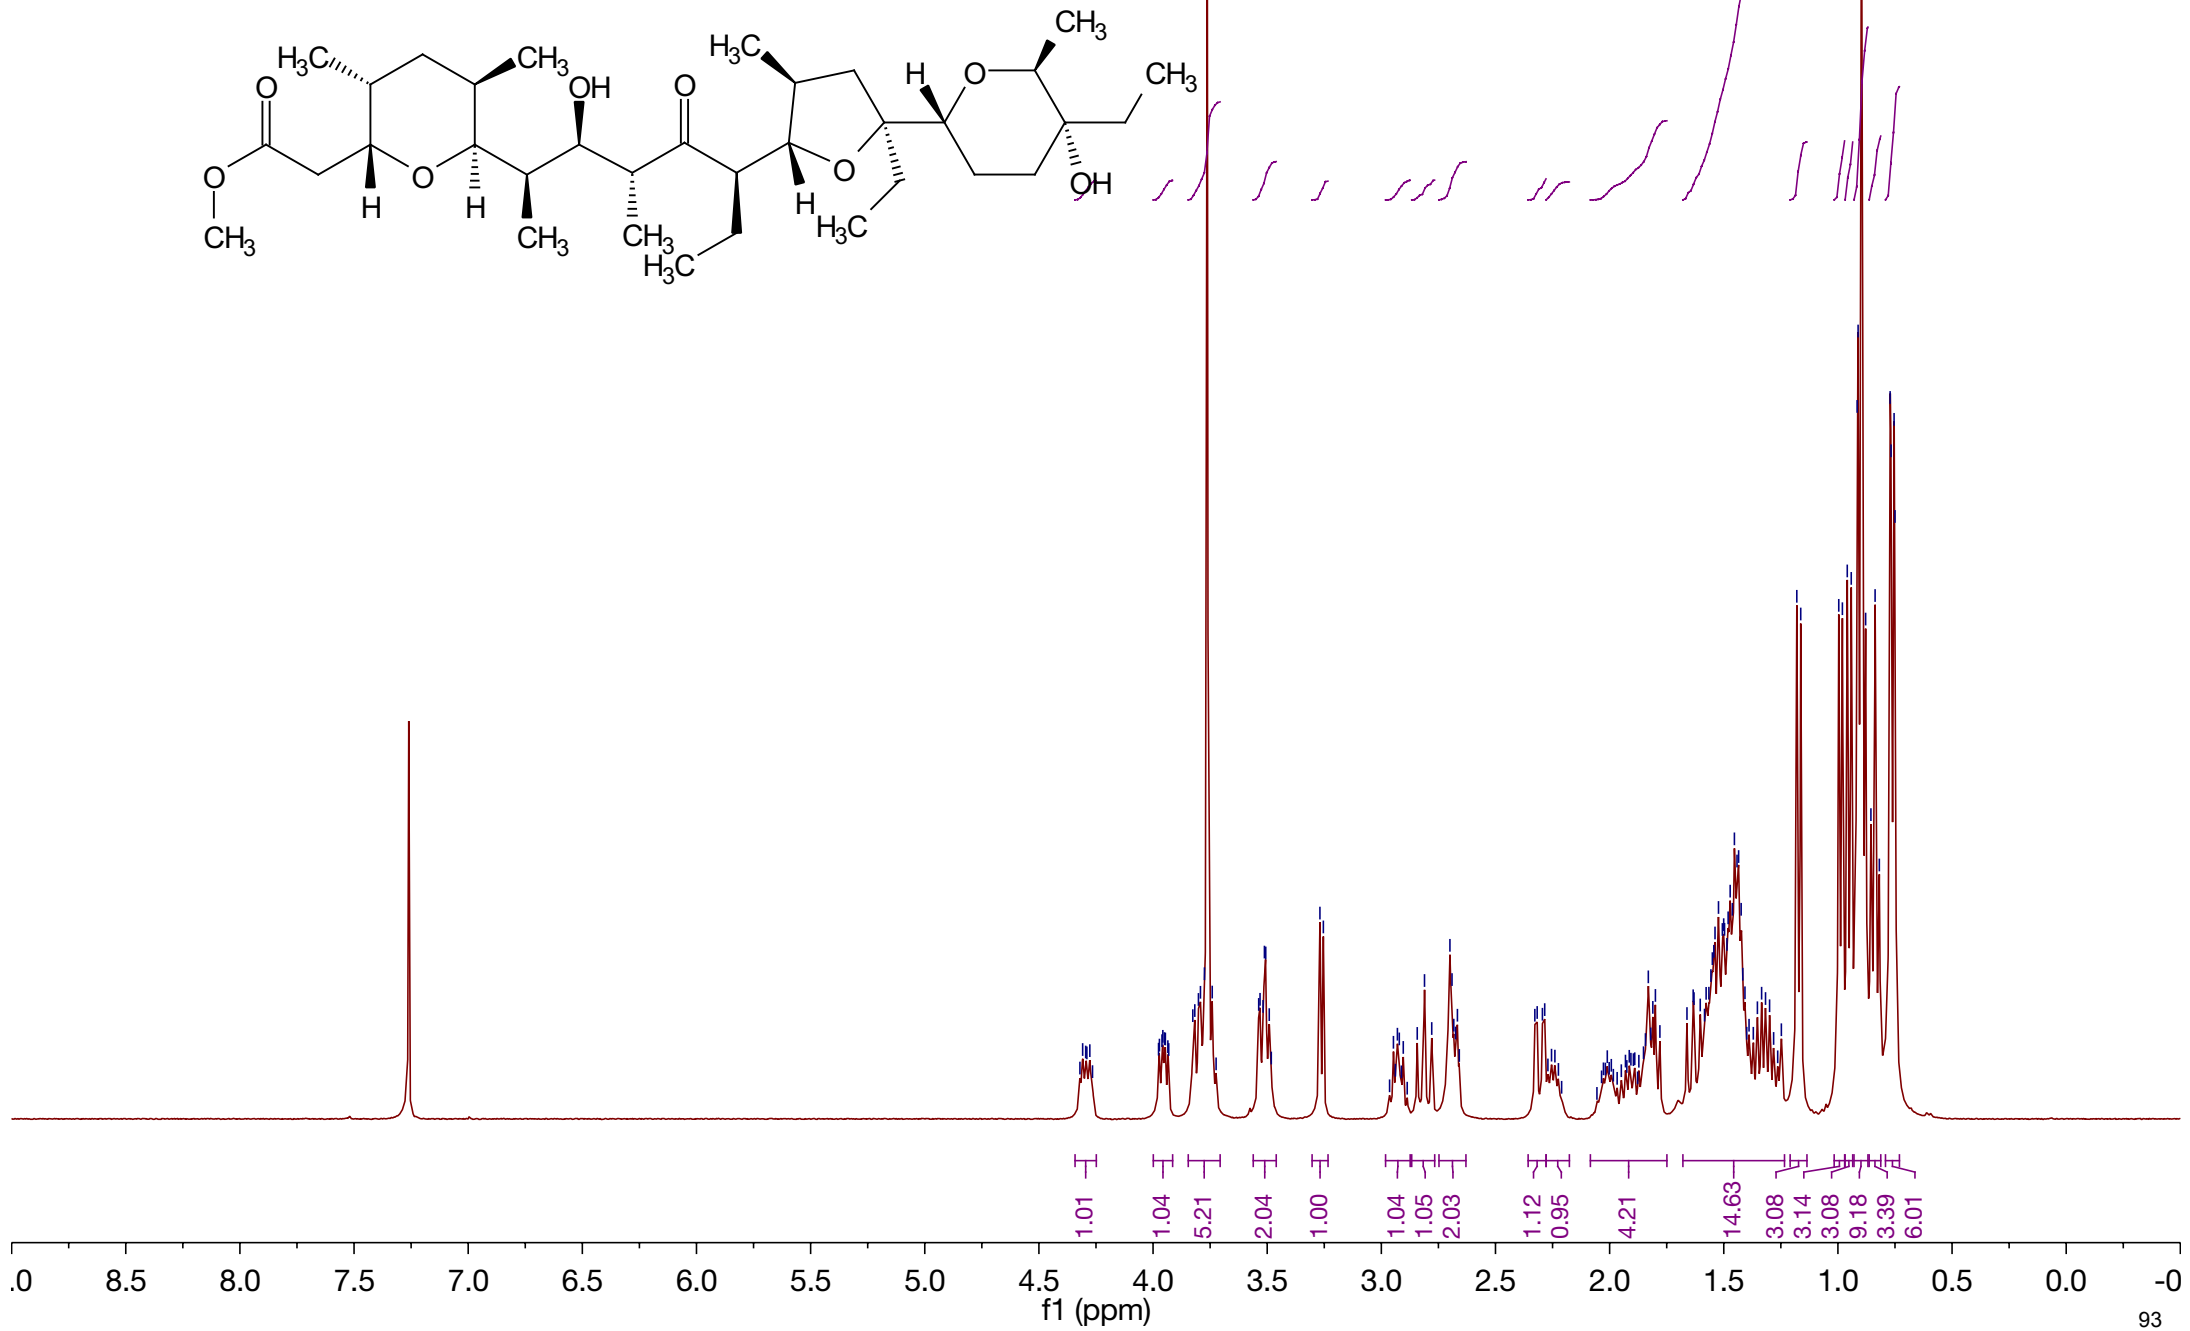

Compound 24

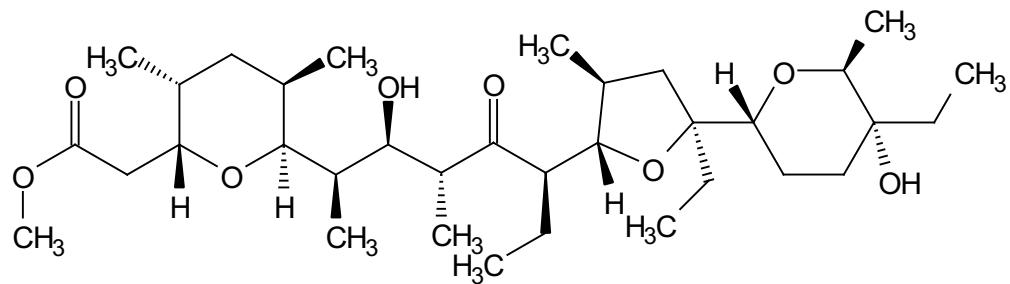

—215.5996

—174.6547

84.4536  
84.0352  
77.4778  
77.1594  
76.8749  
76.8421  
75.3796  
73.0345  
71.9614  
71.0407  
70.4010  
57.6856  
52.6910  
47.0653  
40.1268  
36.8444  
36.3373  
34.9953  
32.2980  
30.5469  
29.4759  
29.1746  
28.9182  
26.9863  
21.7849  
17.7300  
17.6447  
16.2804  
14.2099  
13.7662  
12.4217  
11.6943  
8.0633  
7.2788  
6.5831

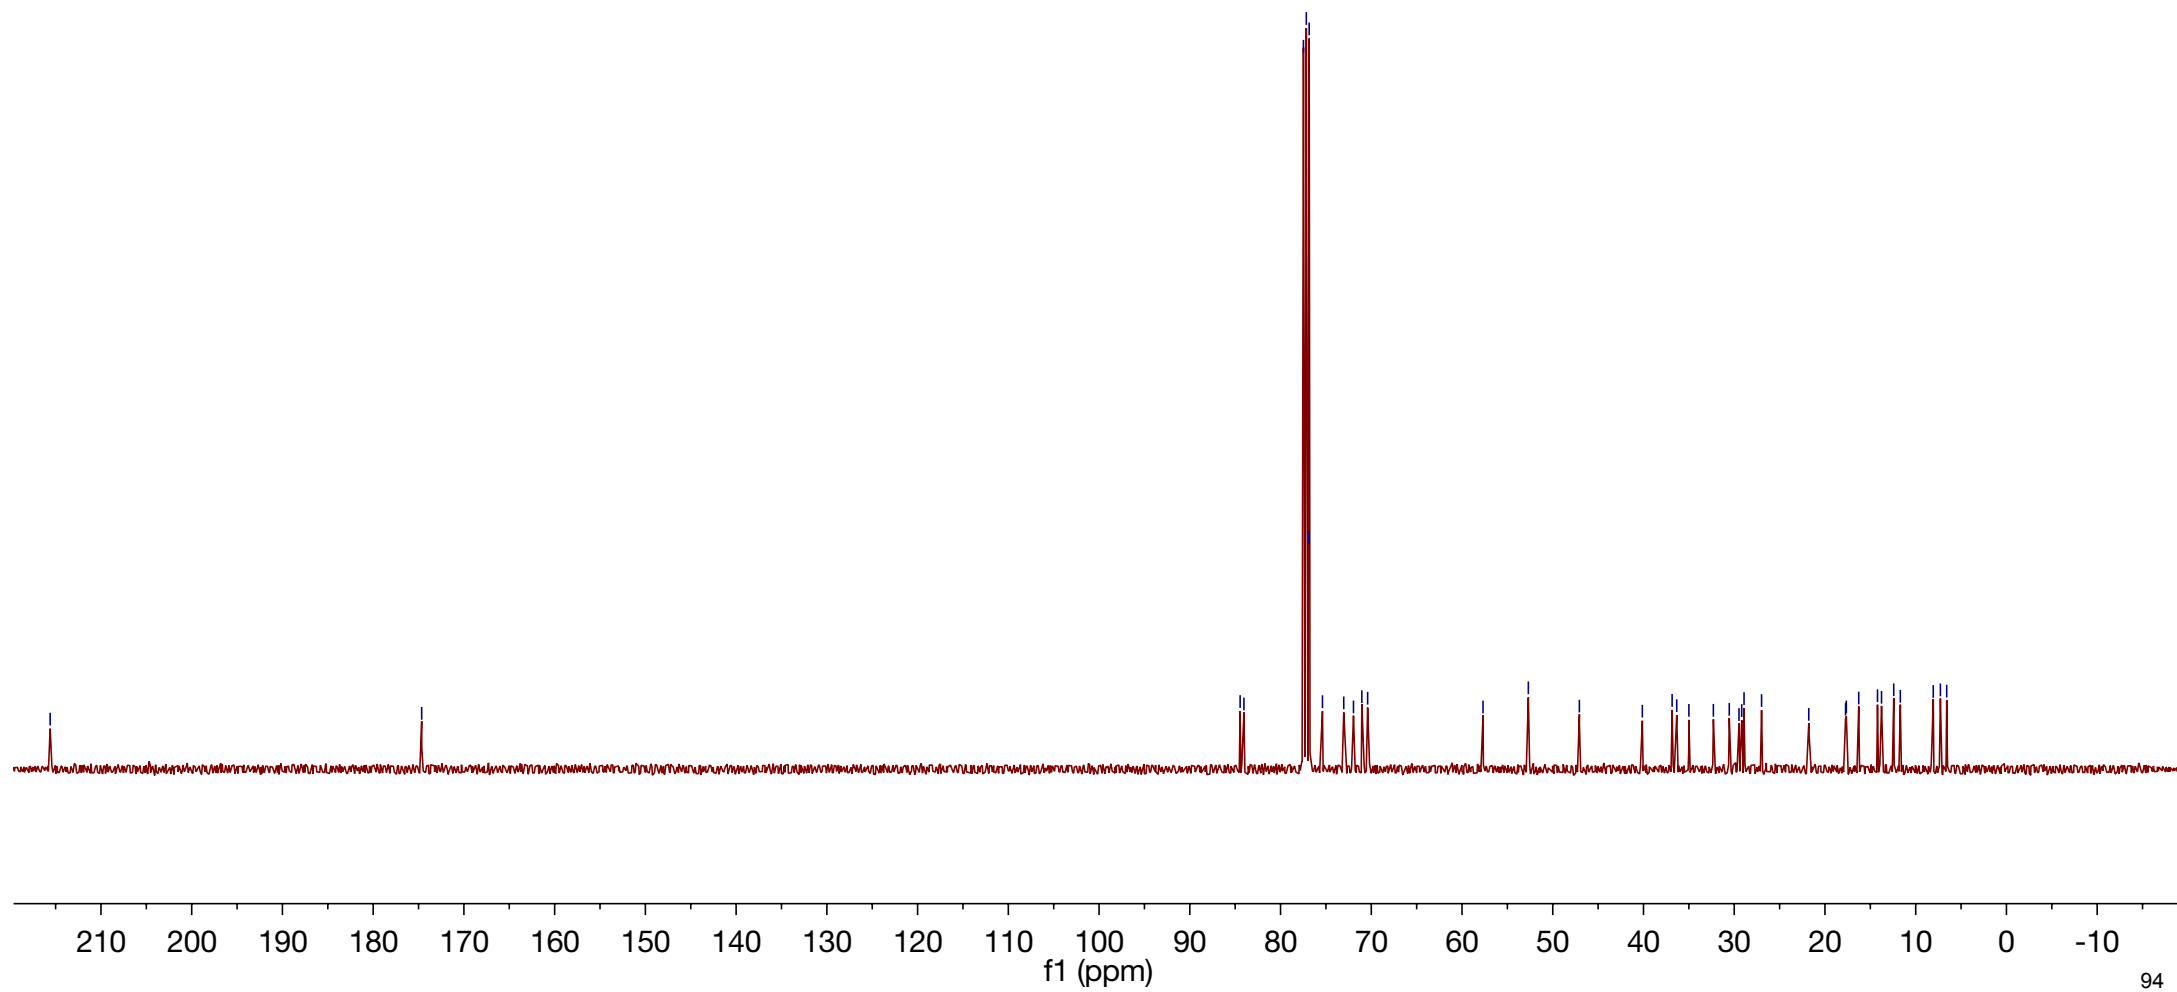

Compound 25

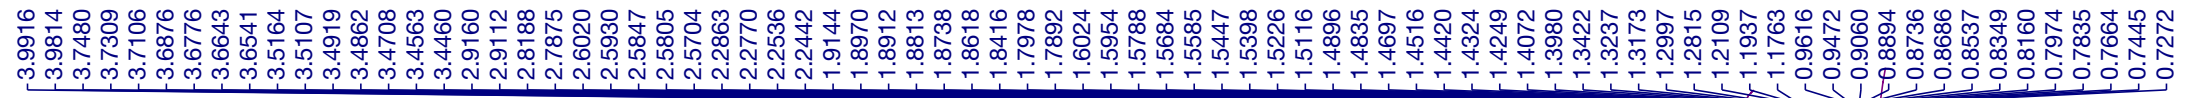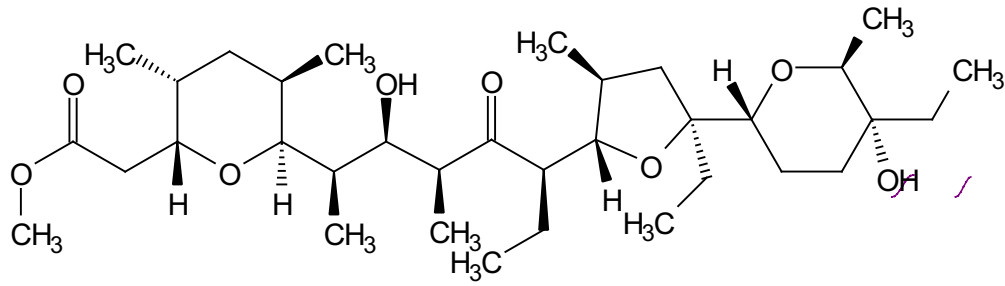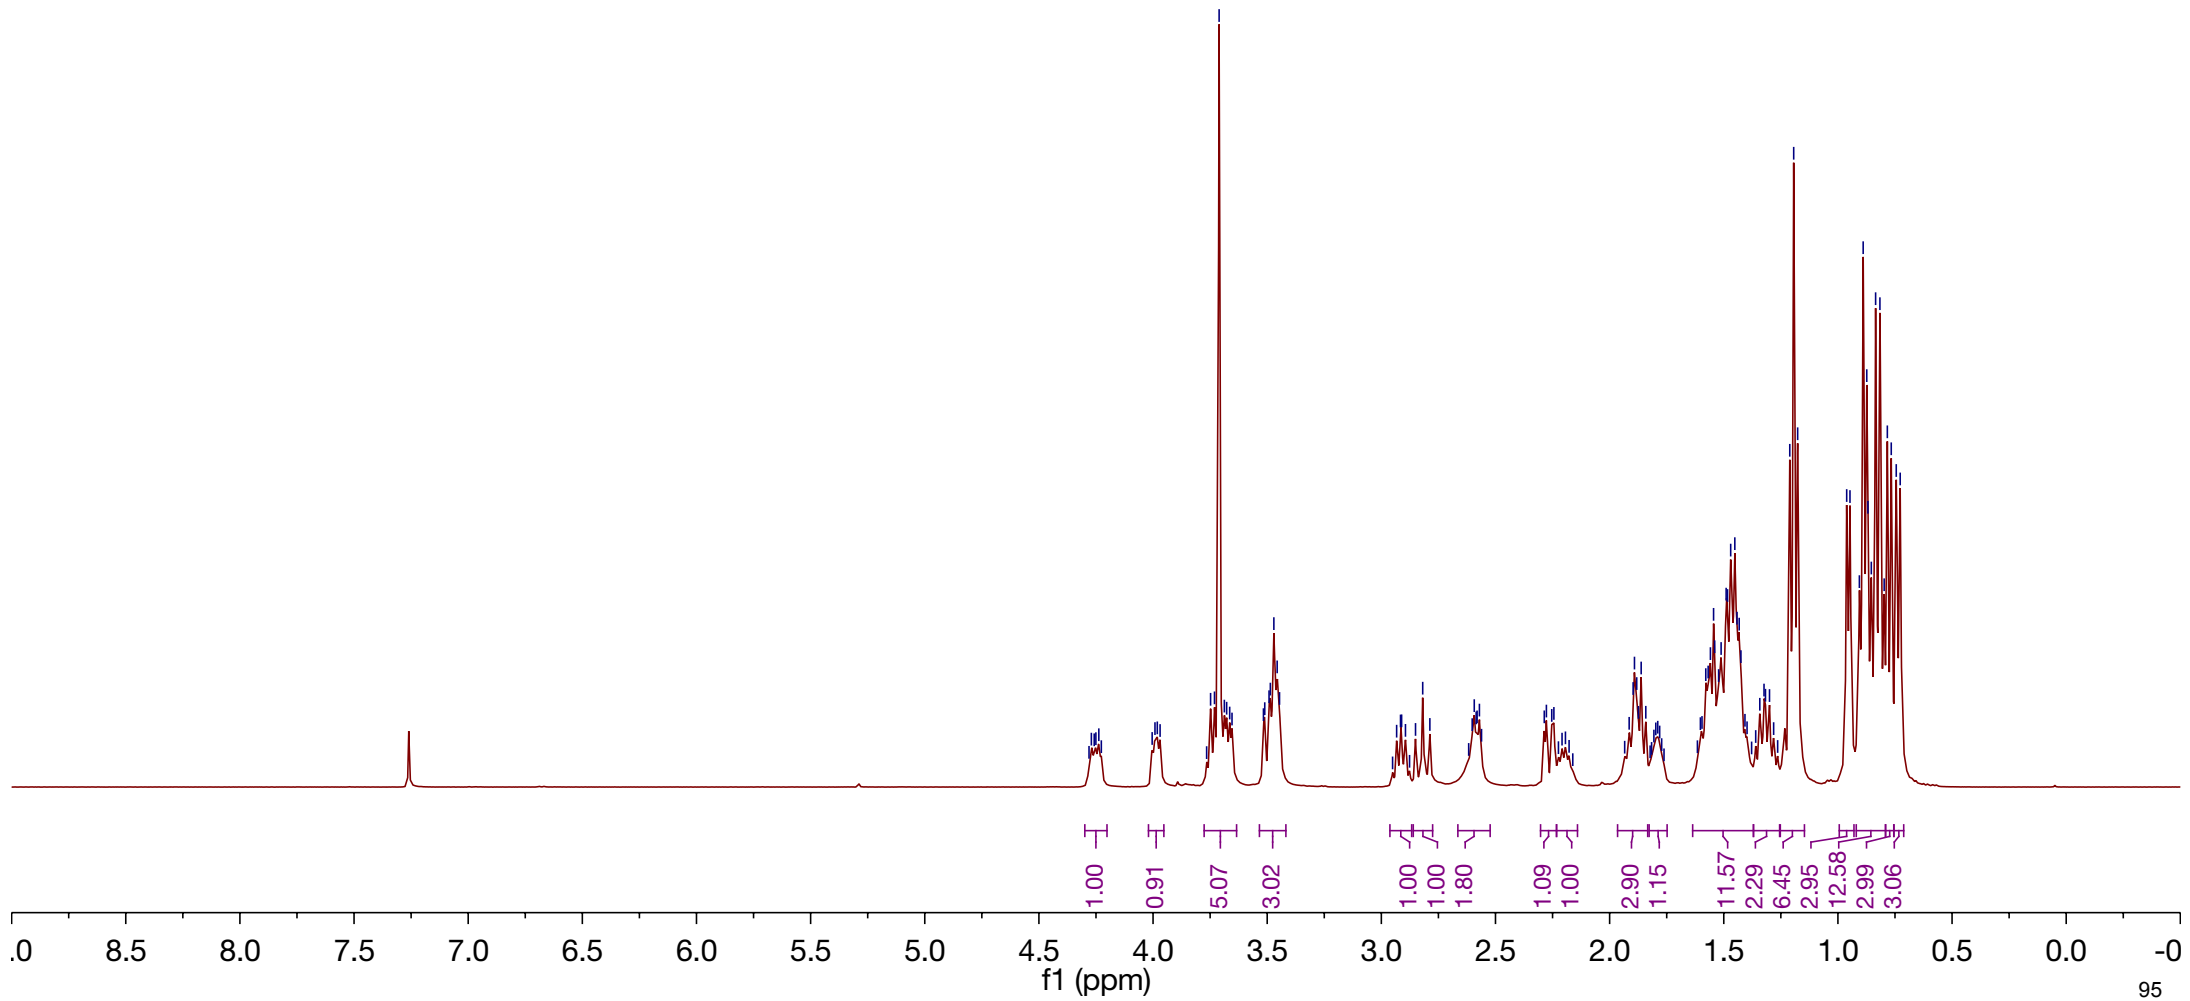

Compound 25

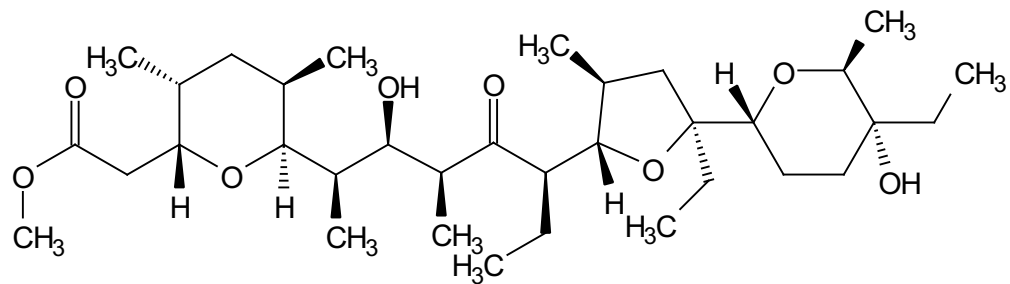

—214.8954

—174.5254

84.5702  
 83.9816  
 77.4766  
 77.1593  
 77.0500  
 76.8415  
 75.2650  
 73.1473  
 71.3041  
 71.0788  
 69.5720  
 55.7430  
 52.2778  
 48.1885  
 41.0696  
 37.8856  
 37.5844  
 35.0216  
 31.6326  
 30.4910  
 29.3591  
 28.9435  
 28.3239  
 26.9857  
 21.4177  
 18.8843  
 17.7013  
 16.9504  
 15.4561  
 14.2108  
 12.1700  
 11.8216  
 8.6778  
 8.2027  
 6.5515

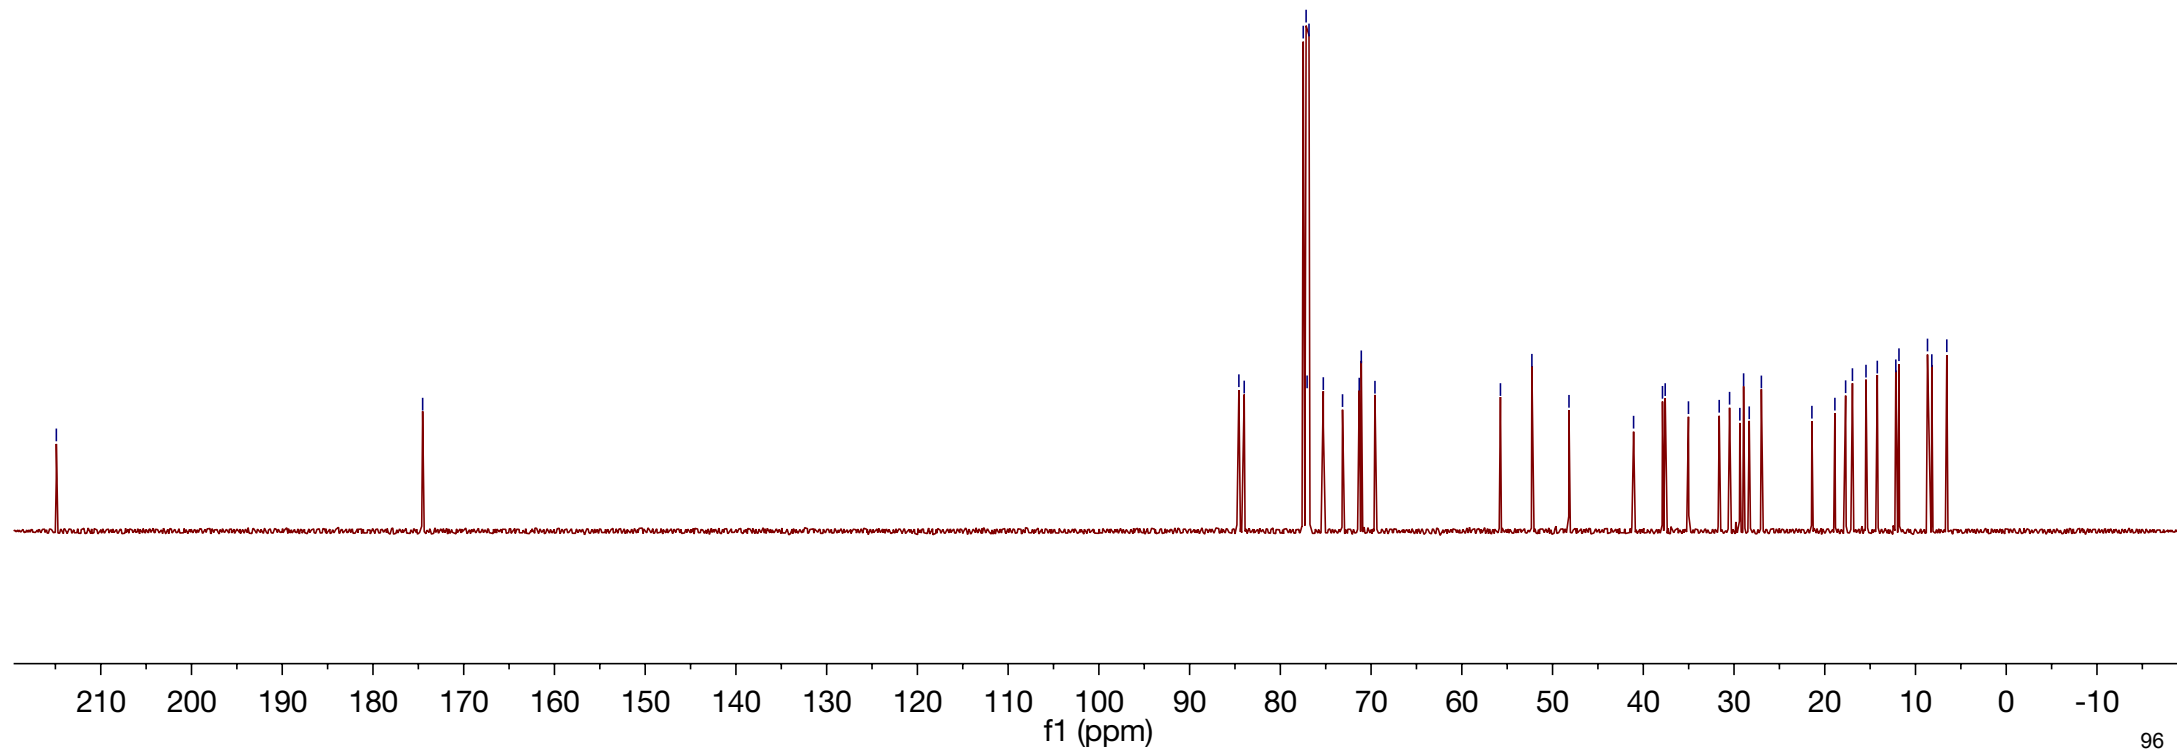



Compound 26

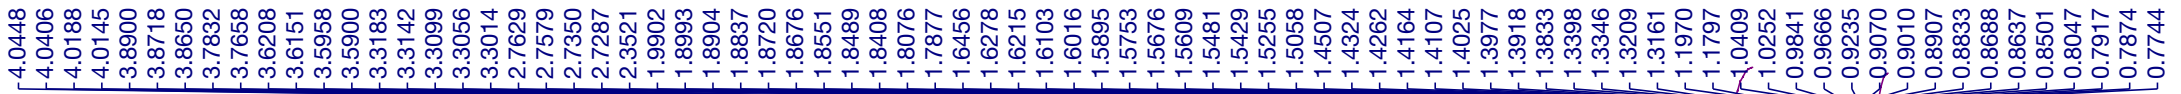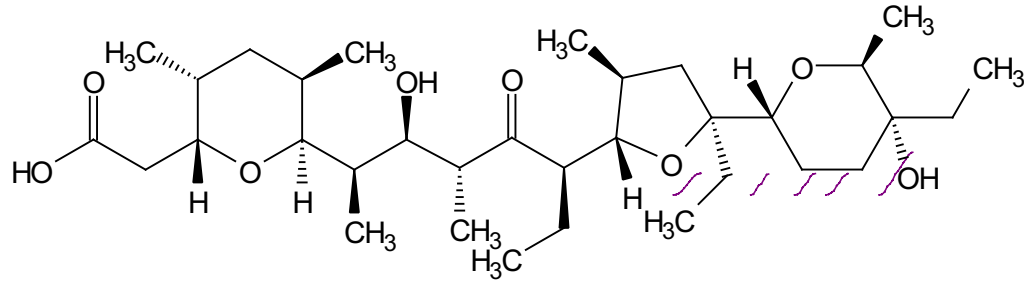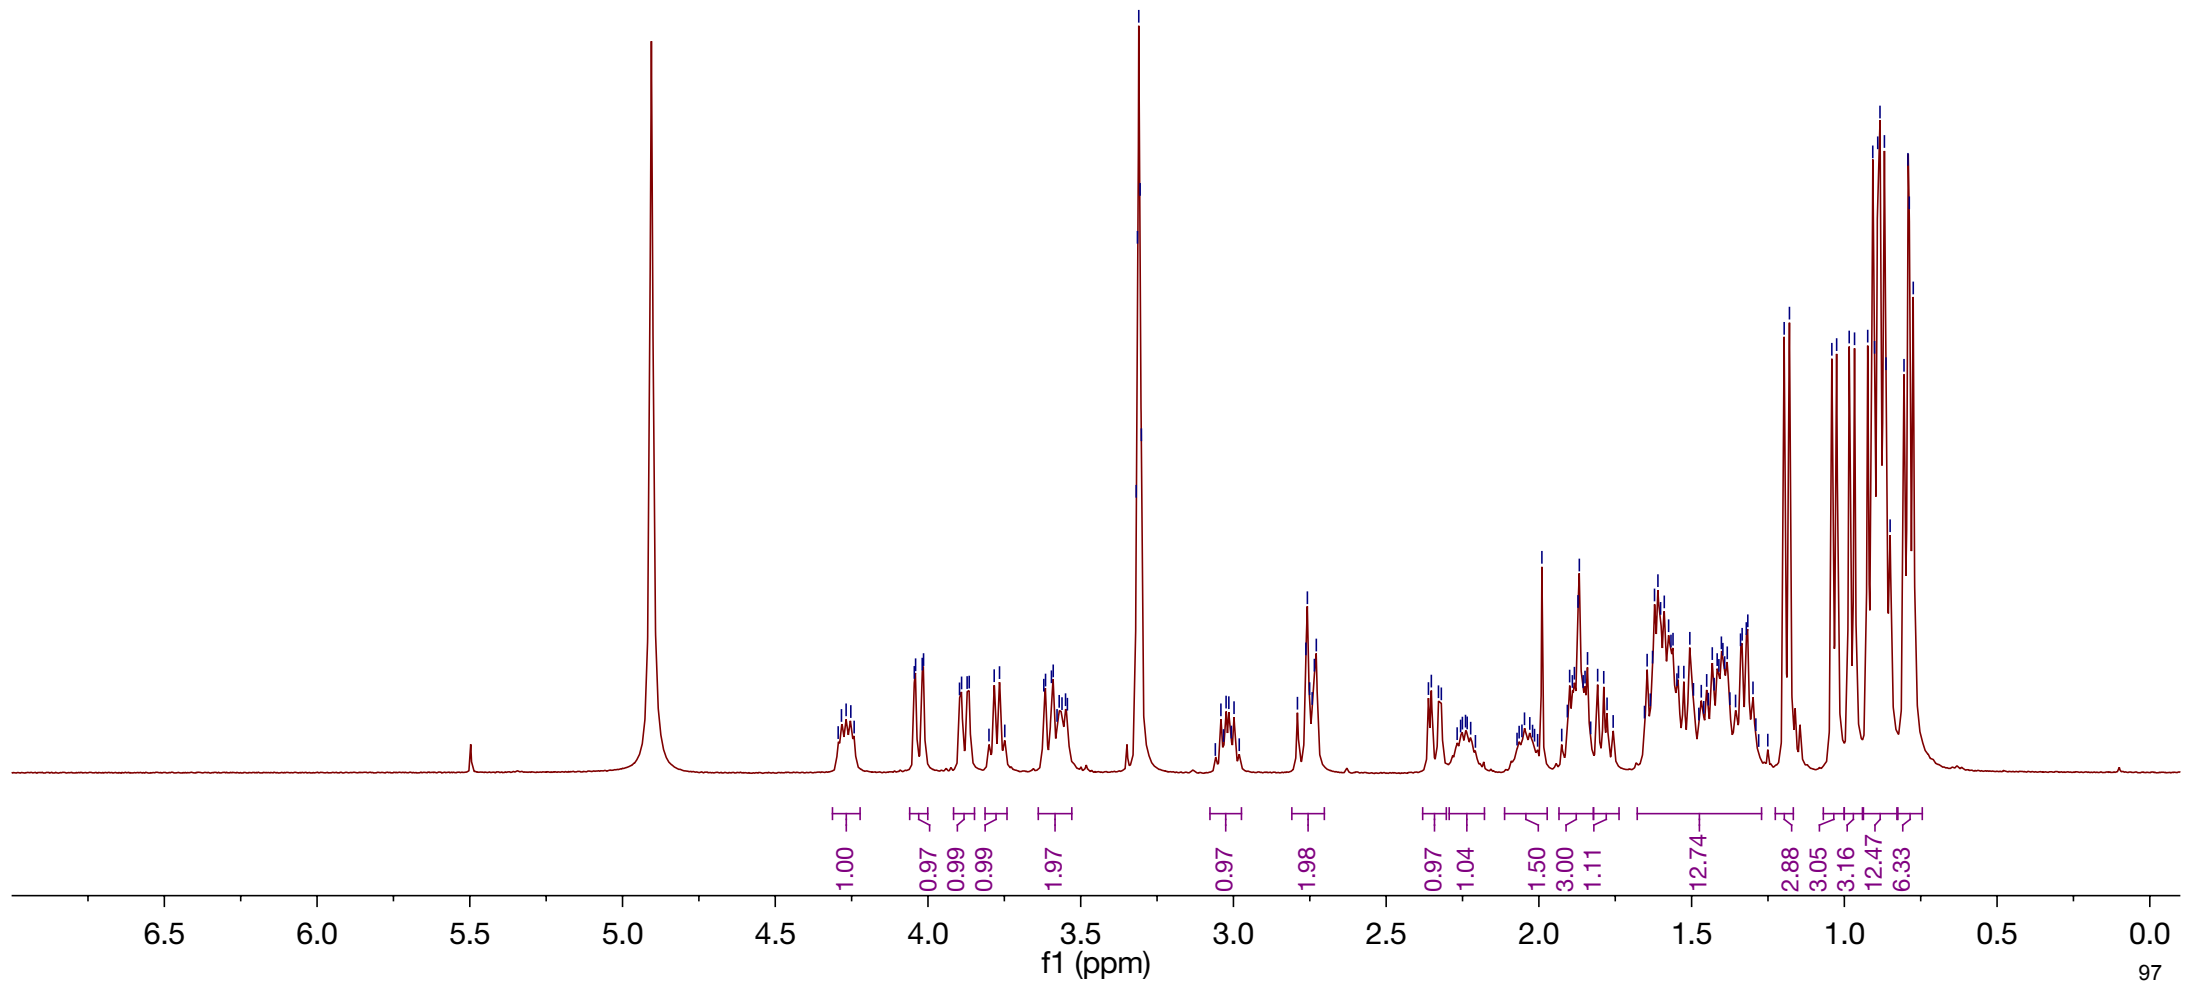

Compound 26

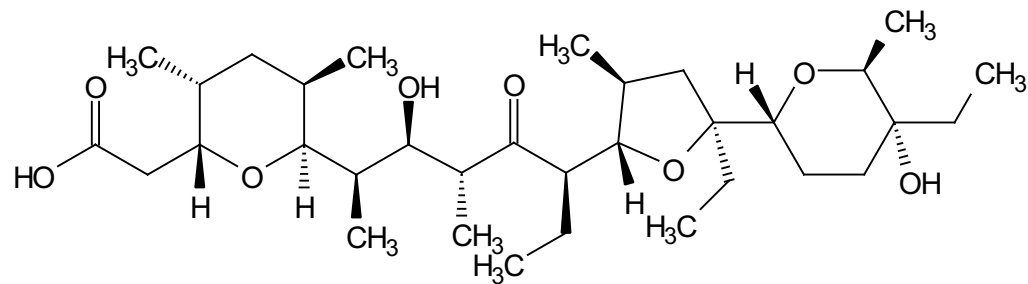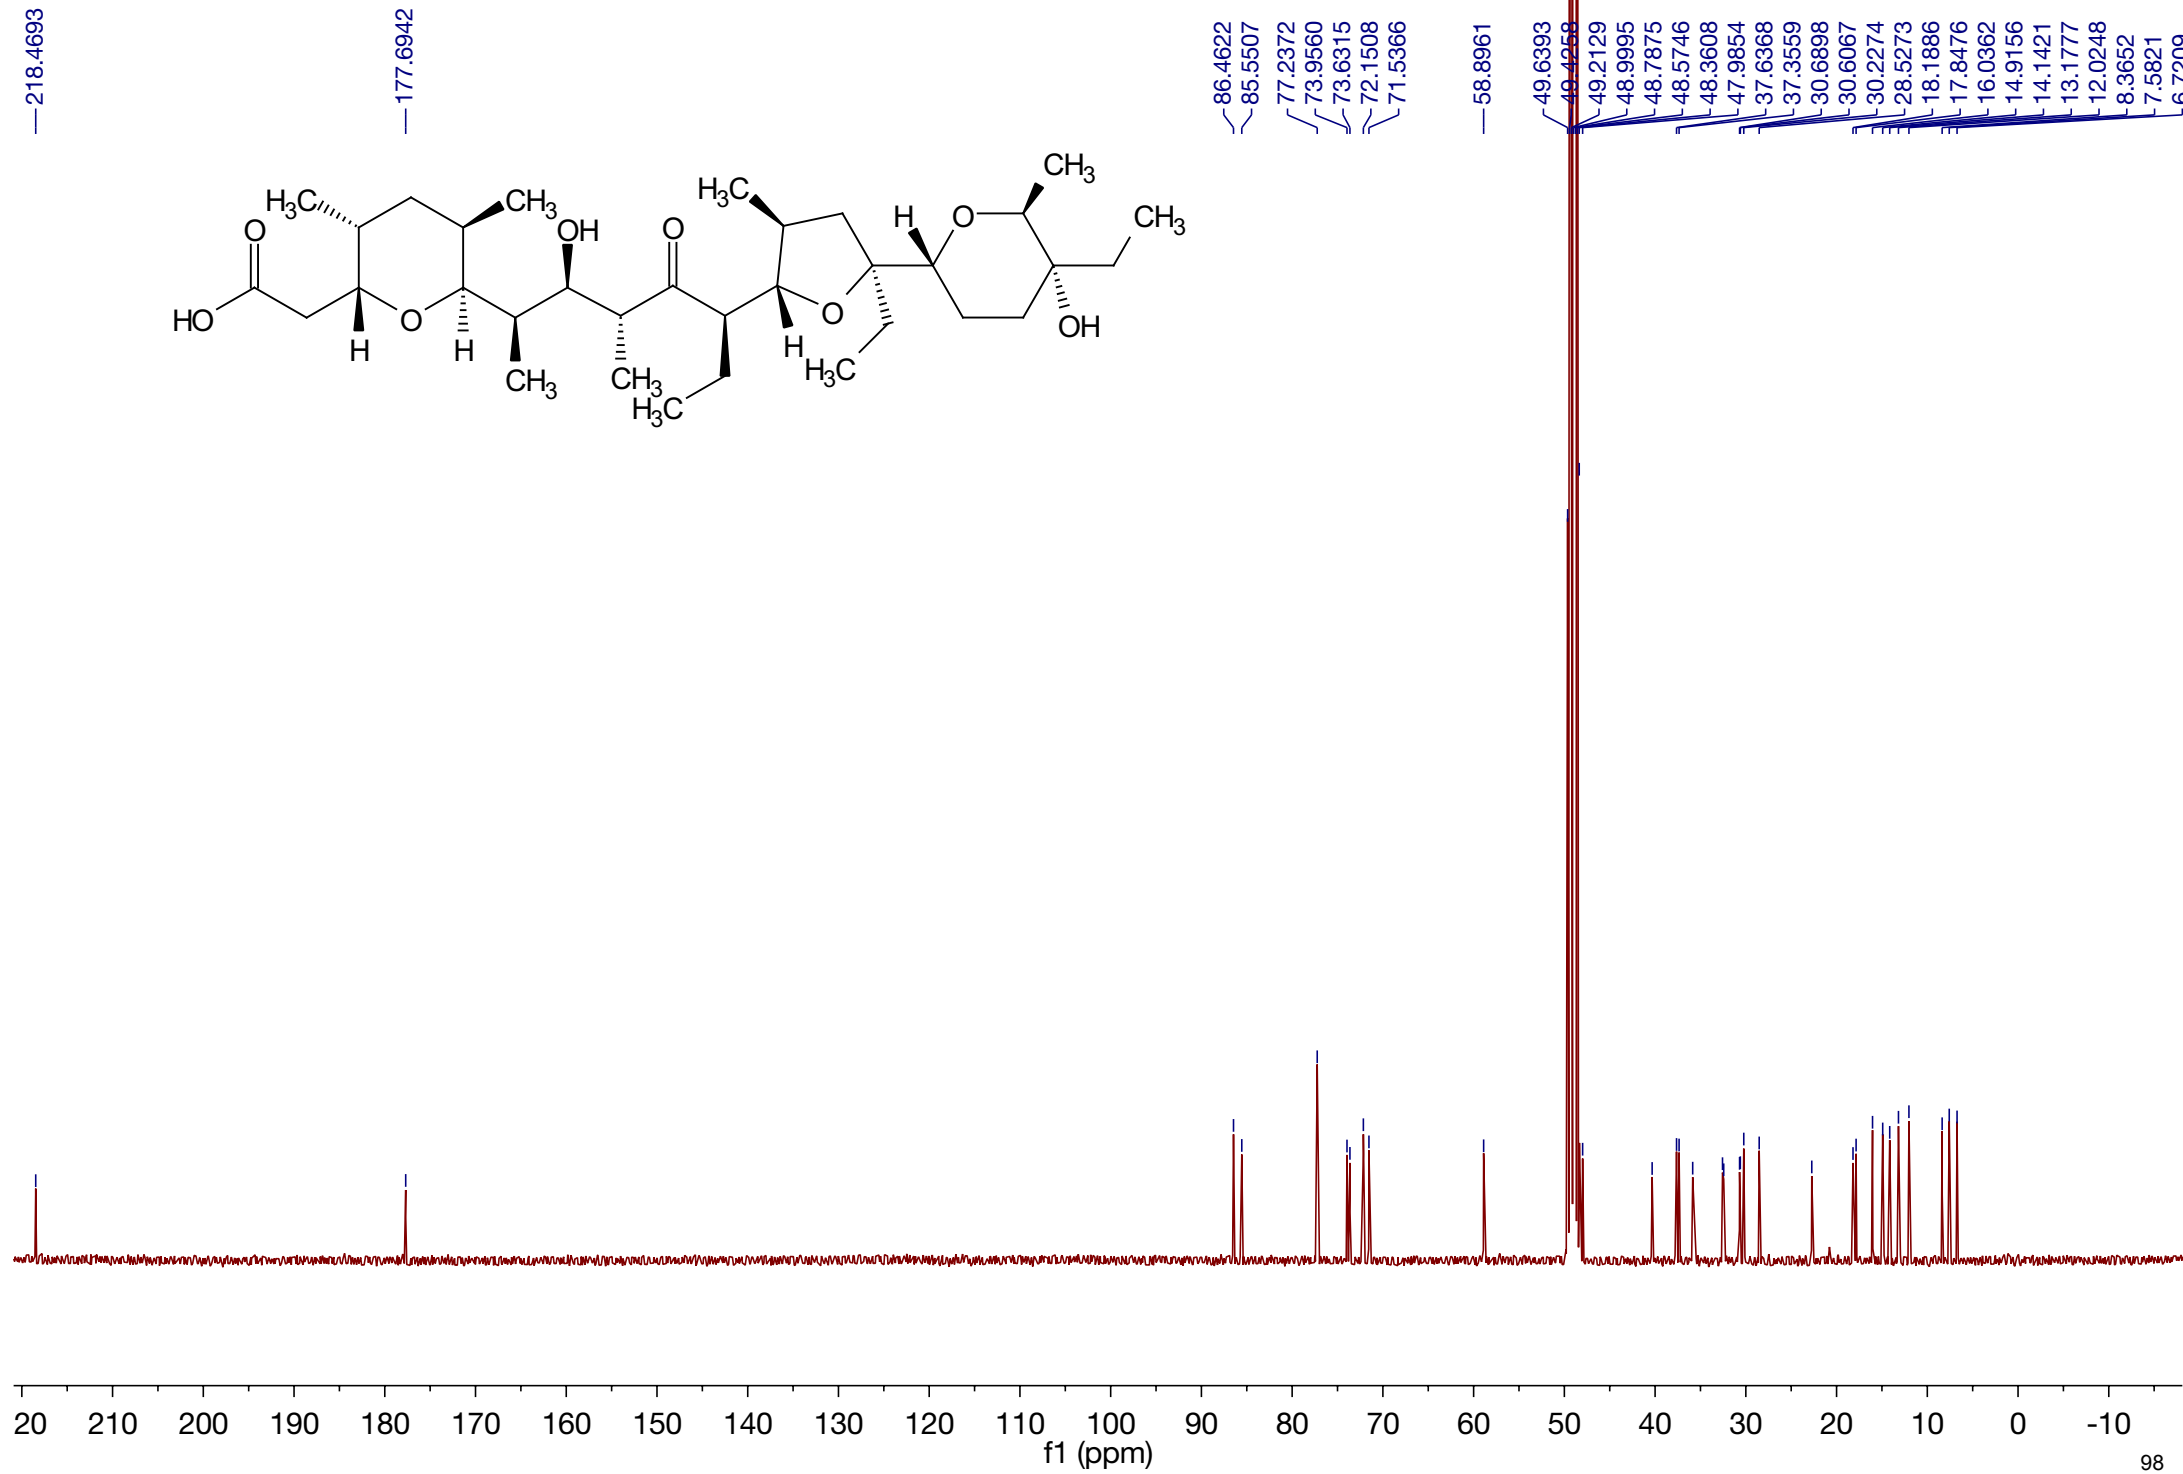

Compound 27

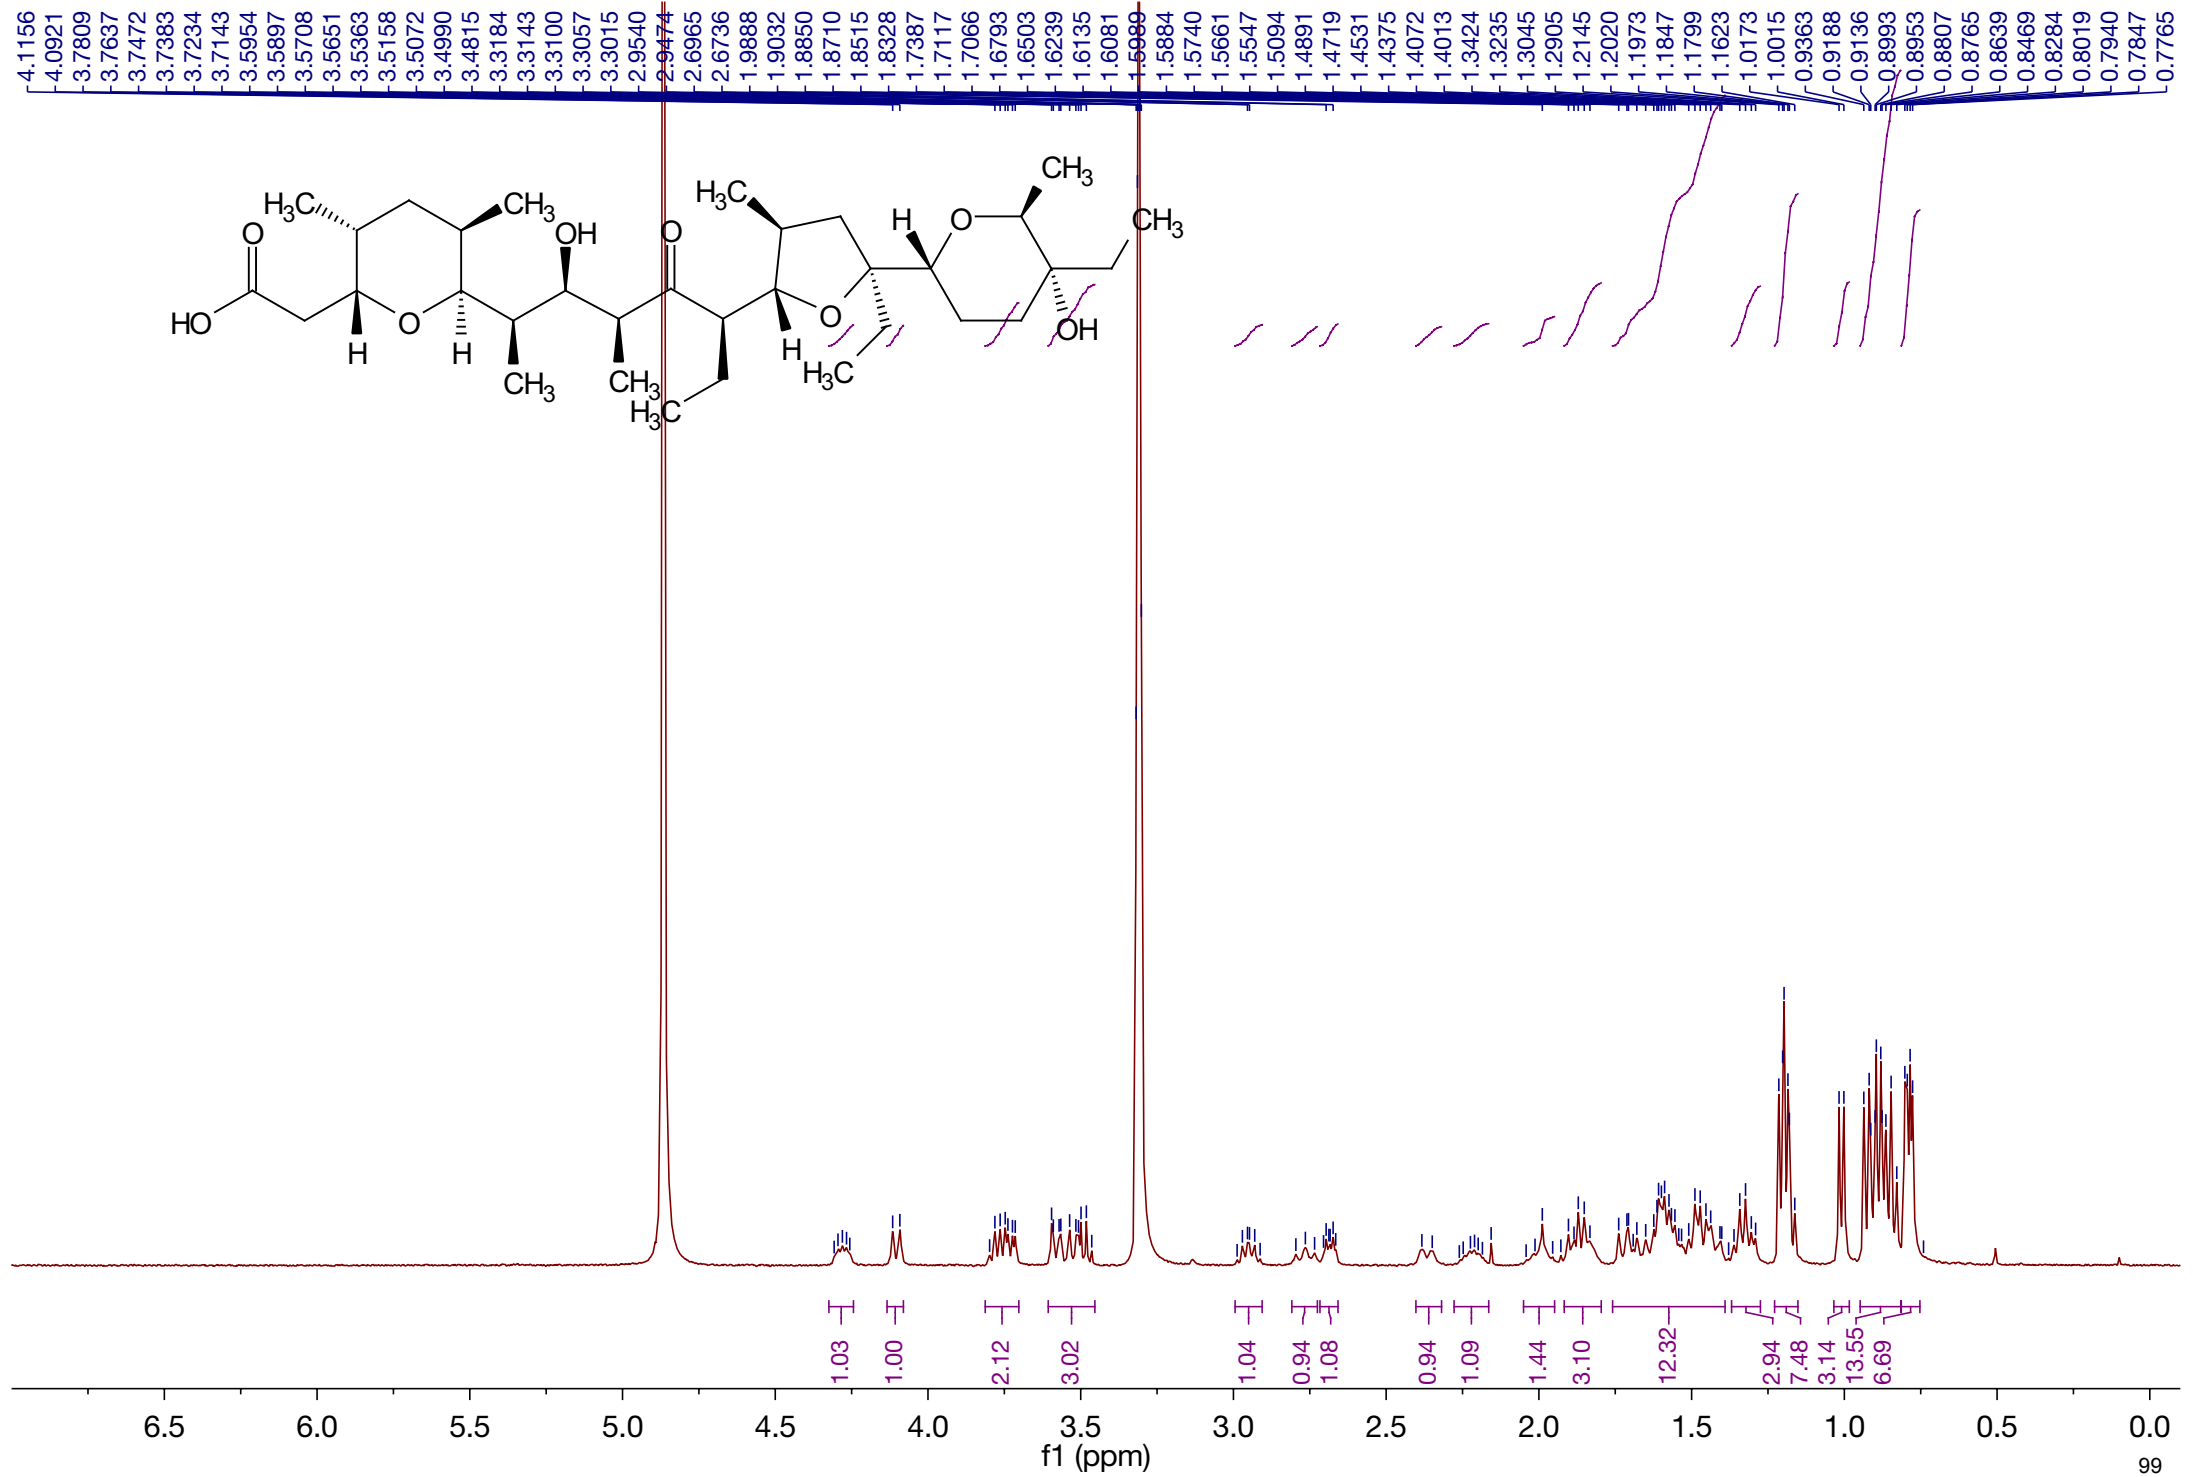

Compound 27

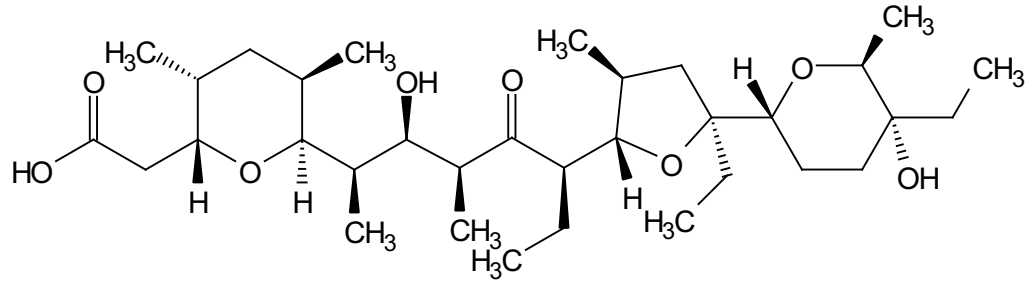

—216.5420

—178.0131

86.5465  
84.9501  
77.4492  
76.8874  
74.1669  
72.4694  
72.1510  
71.0192  
66.8637  
64.2498  
56.8100

49.6399  
49.4915  
49.4261  
49.2132  
49.0012  
48.7880  
48.5750  
48.3615  
38.9503  
38.5637  
32.4293  
30.1638  
28.4685  
19.5915  
17.8482  
17.0896  
15.9262  
14.9558  
12.4242  
12.2969  
8.9420  
8.6026  
6.7437

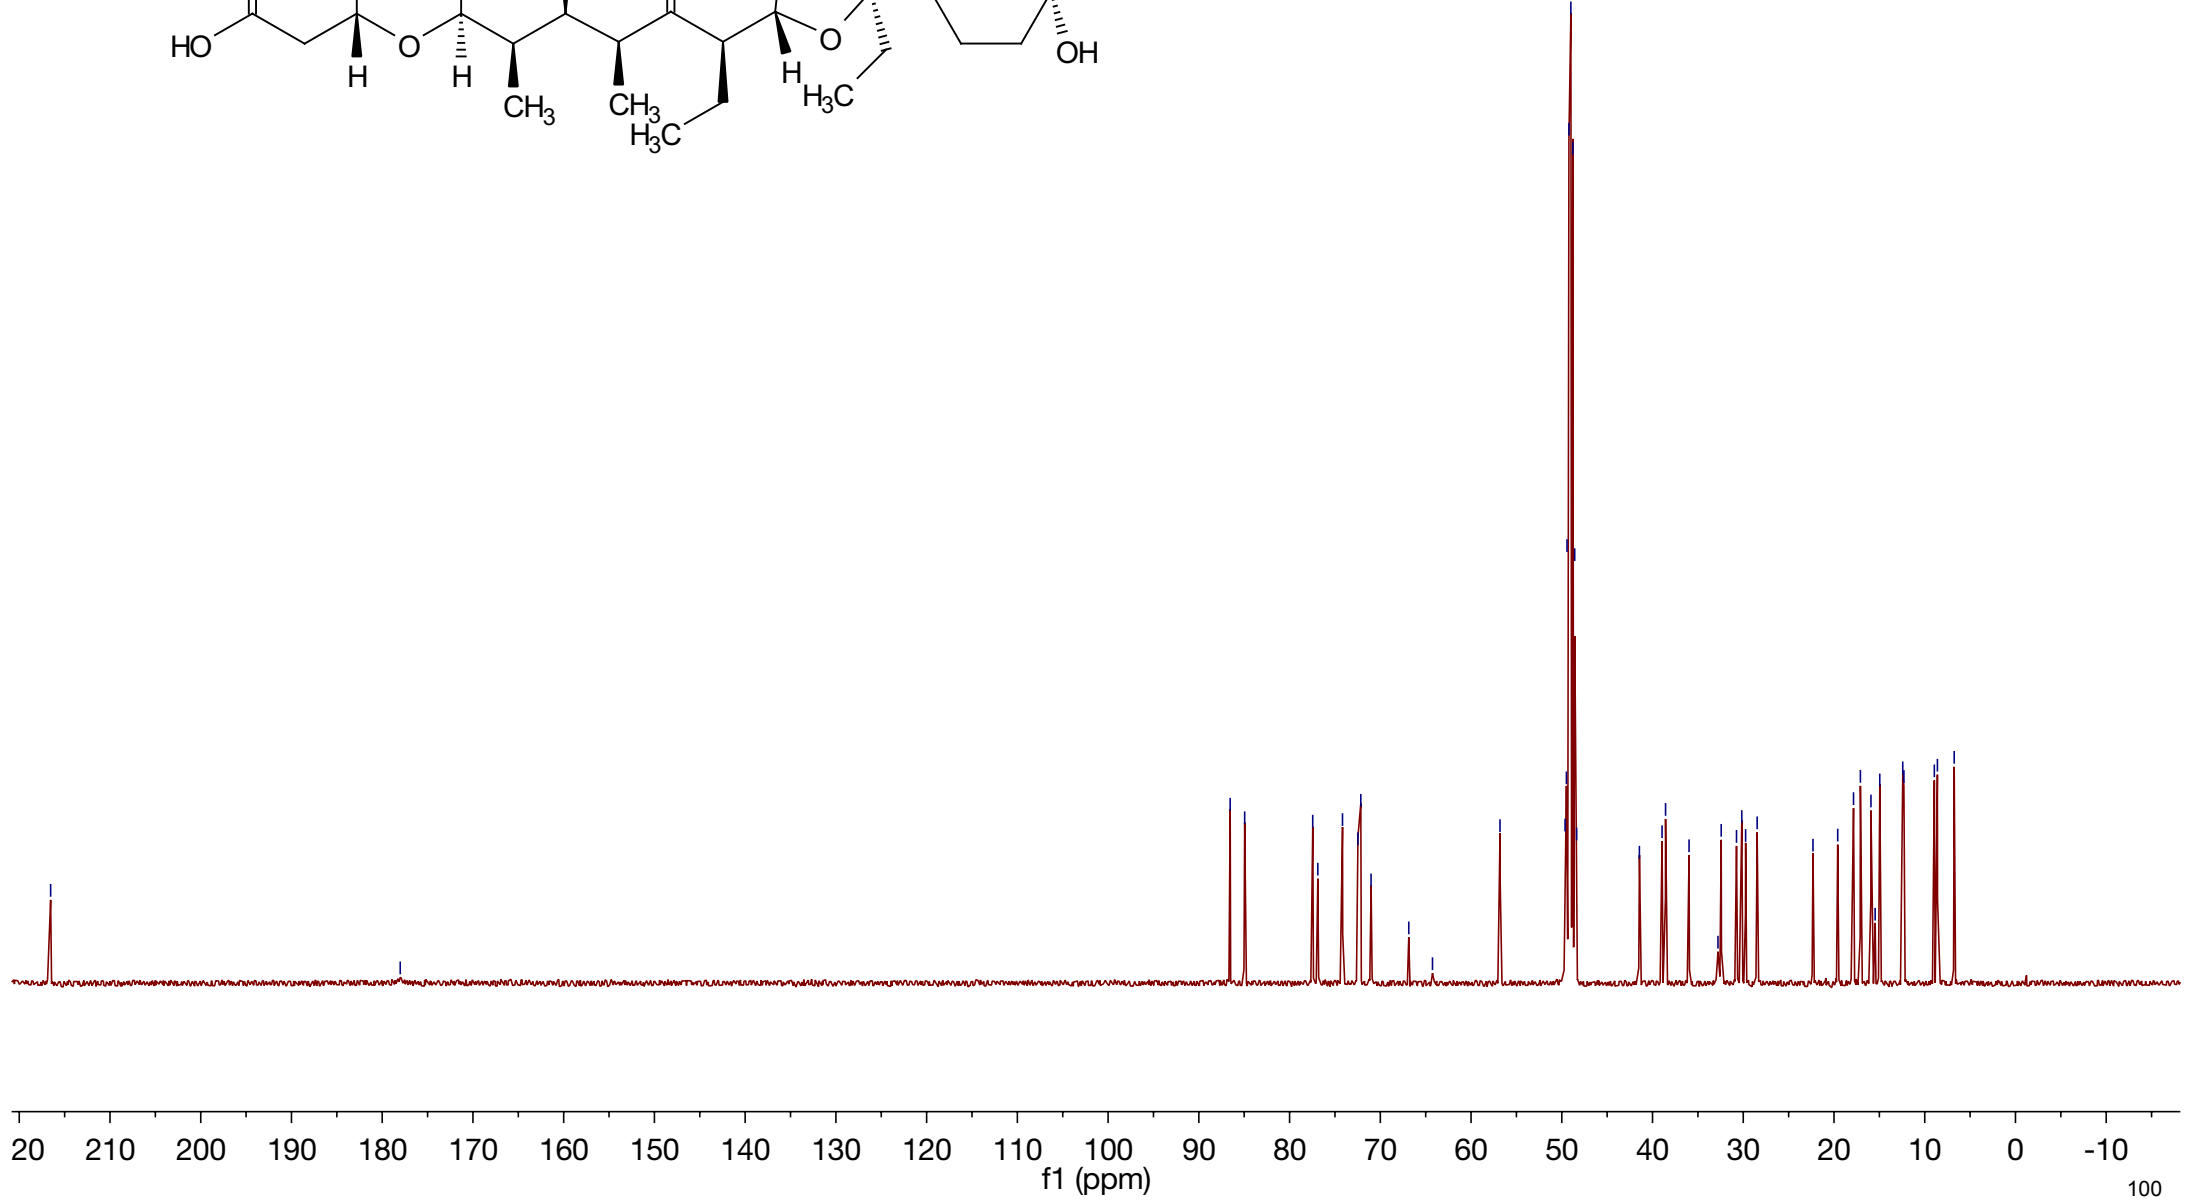

Compound 6

6.043  
4.466  
4.454  
4.151  
4.142  
4.133  
3.908  
3.789  
3.775  
3.769  
3.755  
3.749  
3.663  
3.649  
3.505  
3.486  
3.415  
3.393  
3.369  
3.360  
3.342  
3.331  
2.861  
2.848  
2.841  
2.828  
2.629  
2.611  
2.471  
2.463  
2.445  
2.049  
2.041  
1.923  
1.916  
1.752  
1.729  
1.716  
1.699  
1.584  
1.565  
1.563  
1.538  
1.475  
1.443  
1.422  
1.409  
1.394  
1.350  
1.325  
1.297  
1.256  
1.232  
1.207  
1.194  
1.190  
1.179  
1.173  
1.160  
1.076  
1.063  
0.955  
0.943  
0.868  
0.854  
0.841  
0.826  
0.811  
0.802  
0.796  
0.788  
0.782  
0.774  
0.768  
0.750  
0.737  
0.668  
0.655

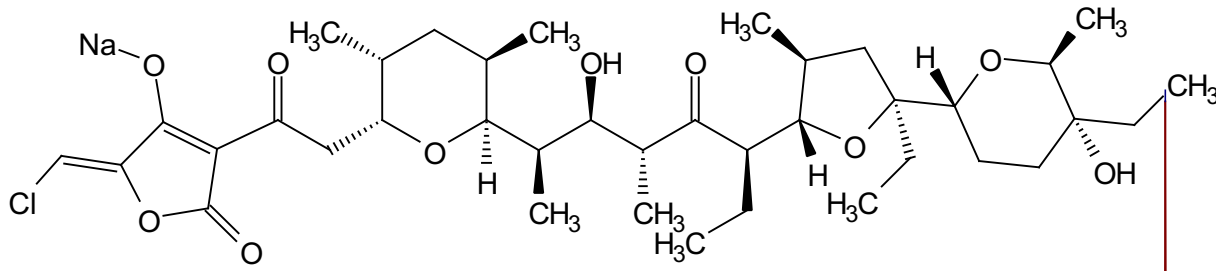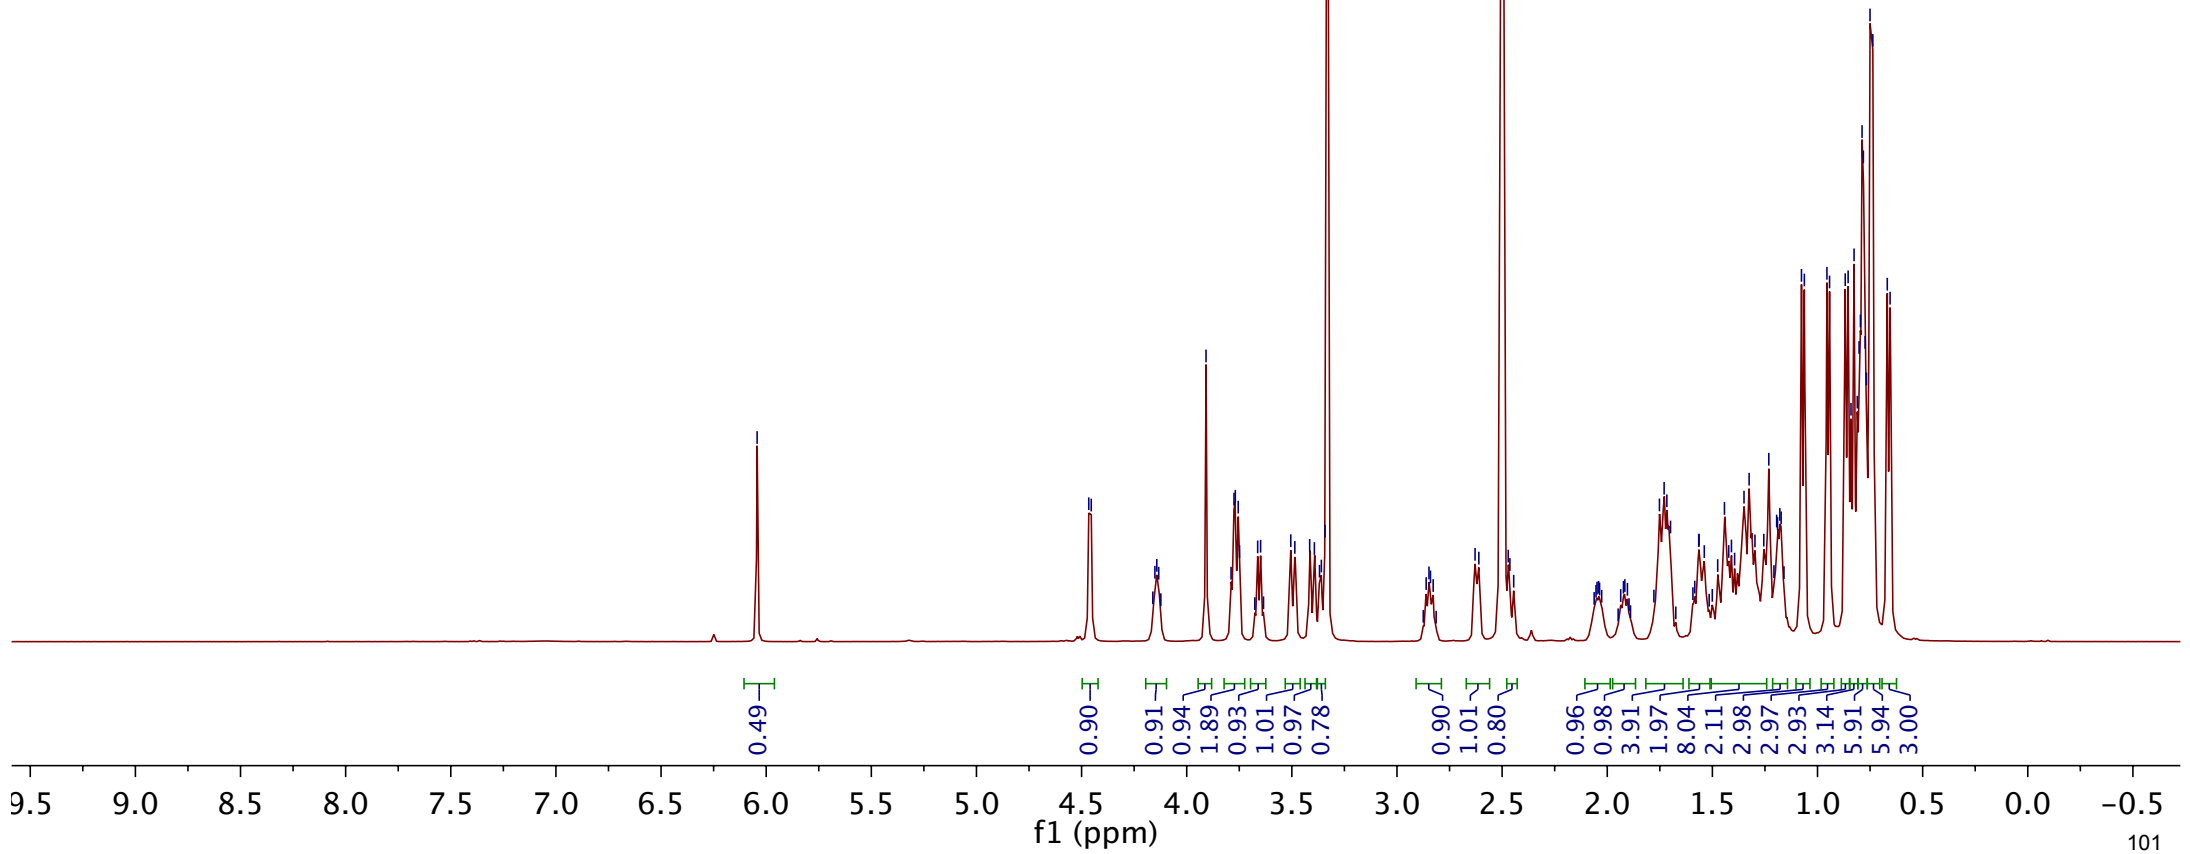

Compound 6

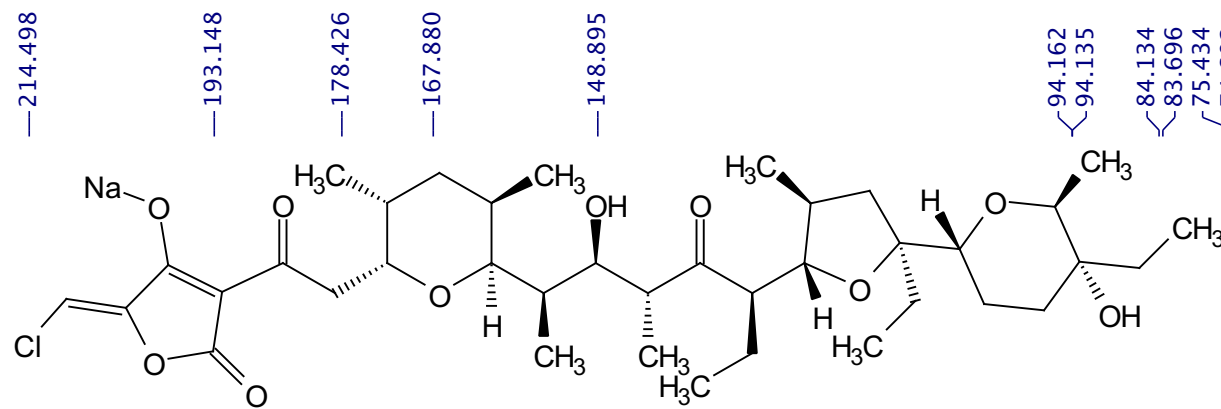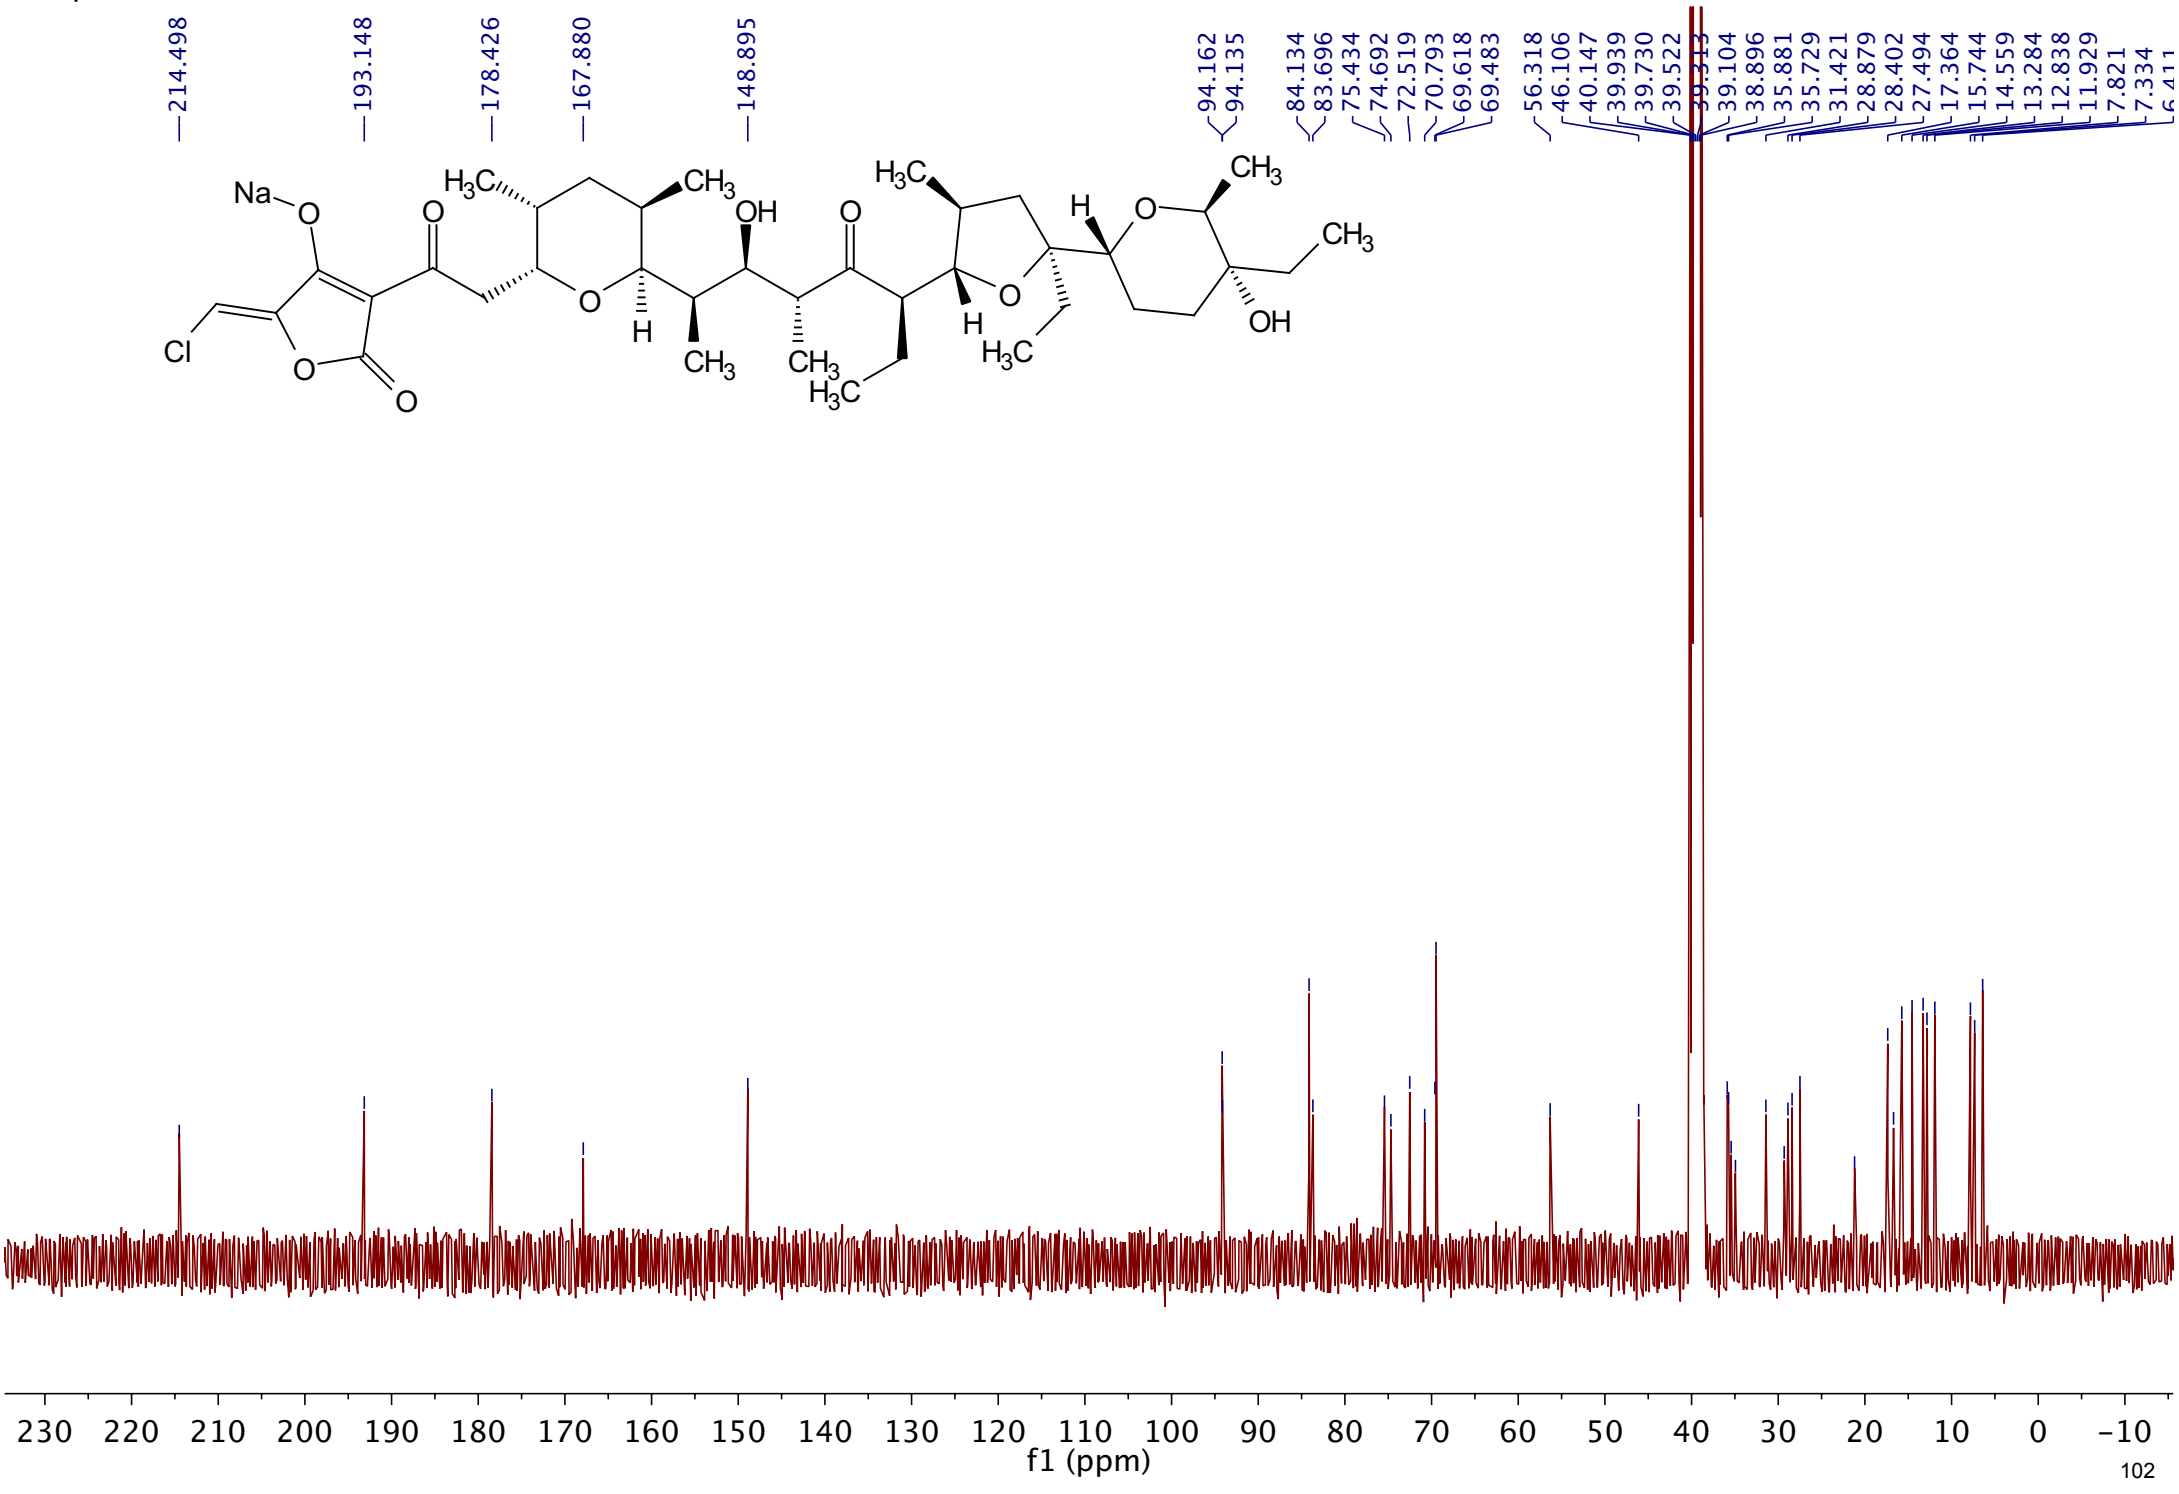

Compound 29

6.057  
4.461  
4.449  
4.148  
4.139  
3.904  
3.779  
3.772  
3.759  
3.752  
3.660  
3.646  
3.504  
3.486  
3.412  
3.390  
3.365  
3.356  
2.636  
2.631  
2.625  
2.618  
2.612  
2.507  
2.503  
2.500  
2.496  
2.492  
2.482  
2.466  
2.457  
1.760  
1.734  
1.714  
1.697  
1.567  
1.557  
1.541  
1.531  
1.472  
1.441  
1.415  
1.402  
1.387  
1.348  
1.342  
1.327  
1.327  
1.324  
1.314  
1.299  
1.295  
1.255  
1.232  
1.206  
1.192  
1.185  
1.177  
1.170  
1.075  
1.062  
0.956  
0.943  
0.867  
0.853  
0.837  
0.823  
0.807  
0.801  
0.797  
0.787  
0.782  
0.771  
0.767  
0.748  
0.735  
0.667  
0.654

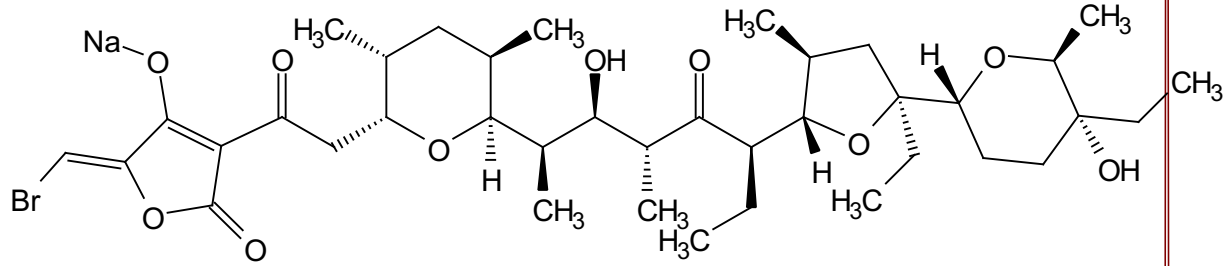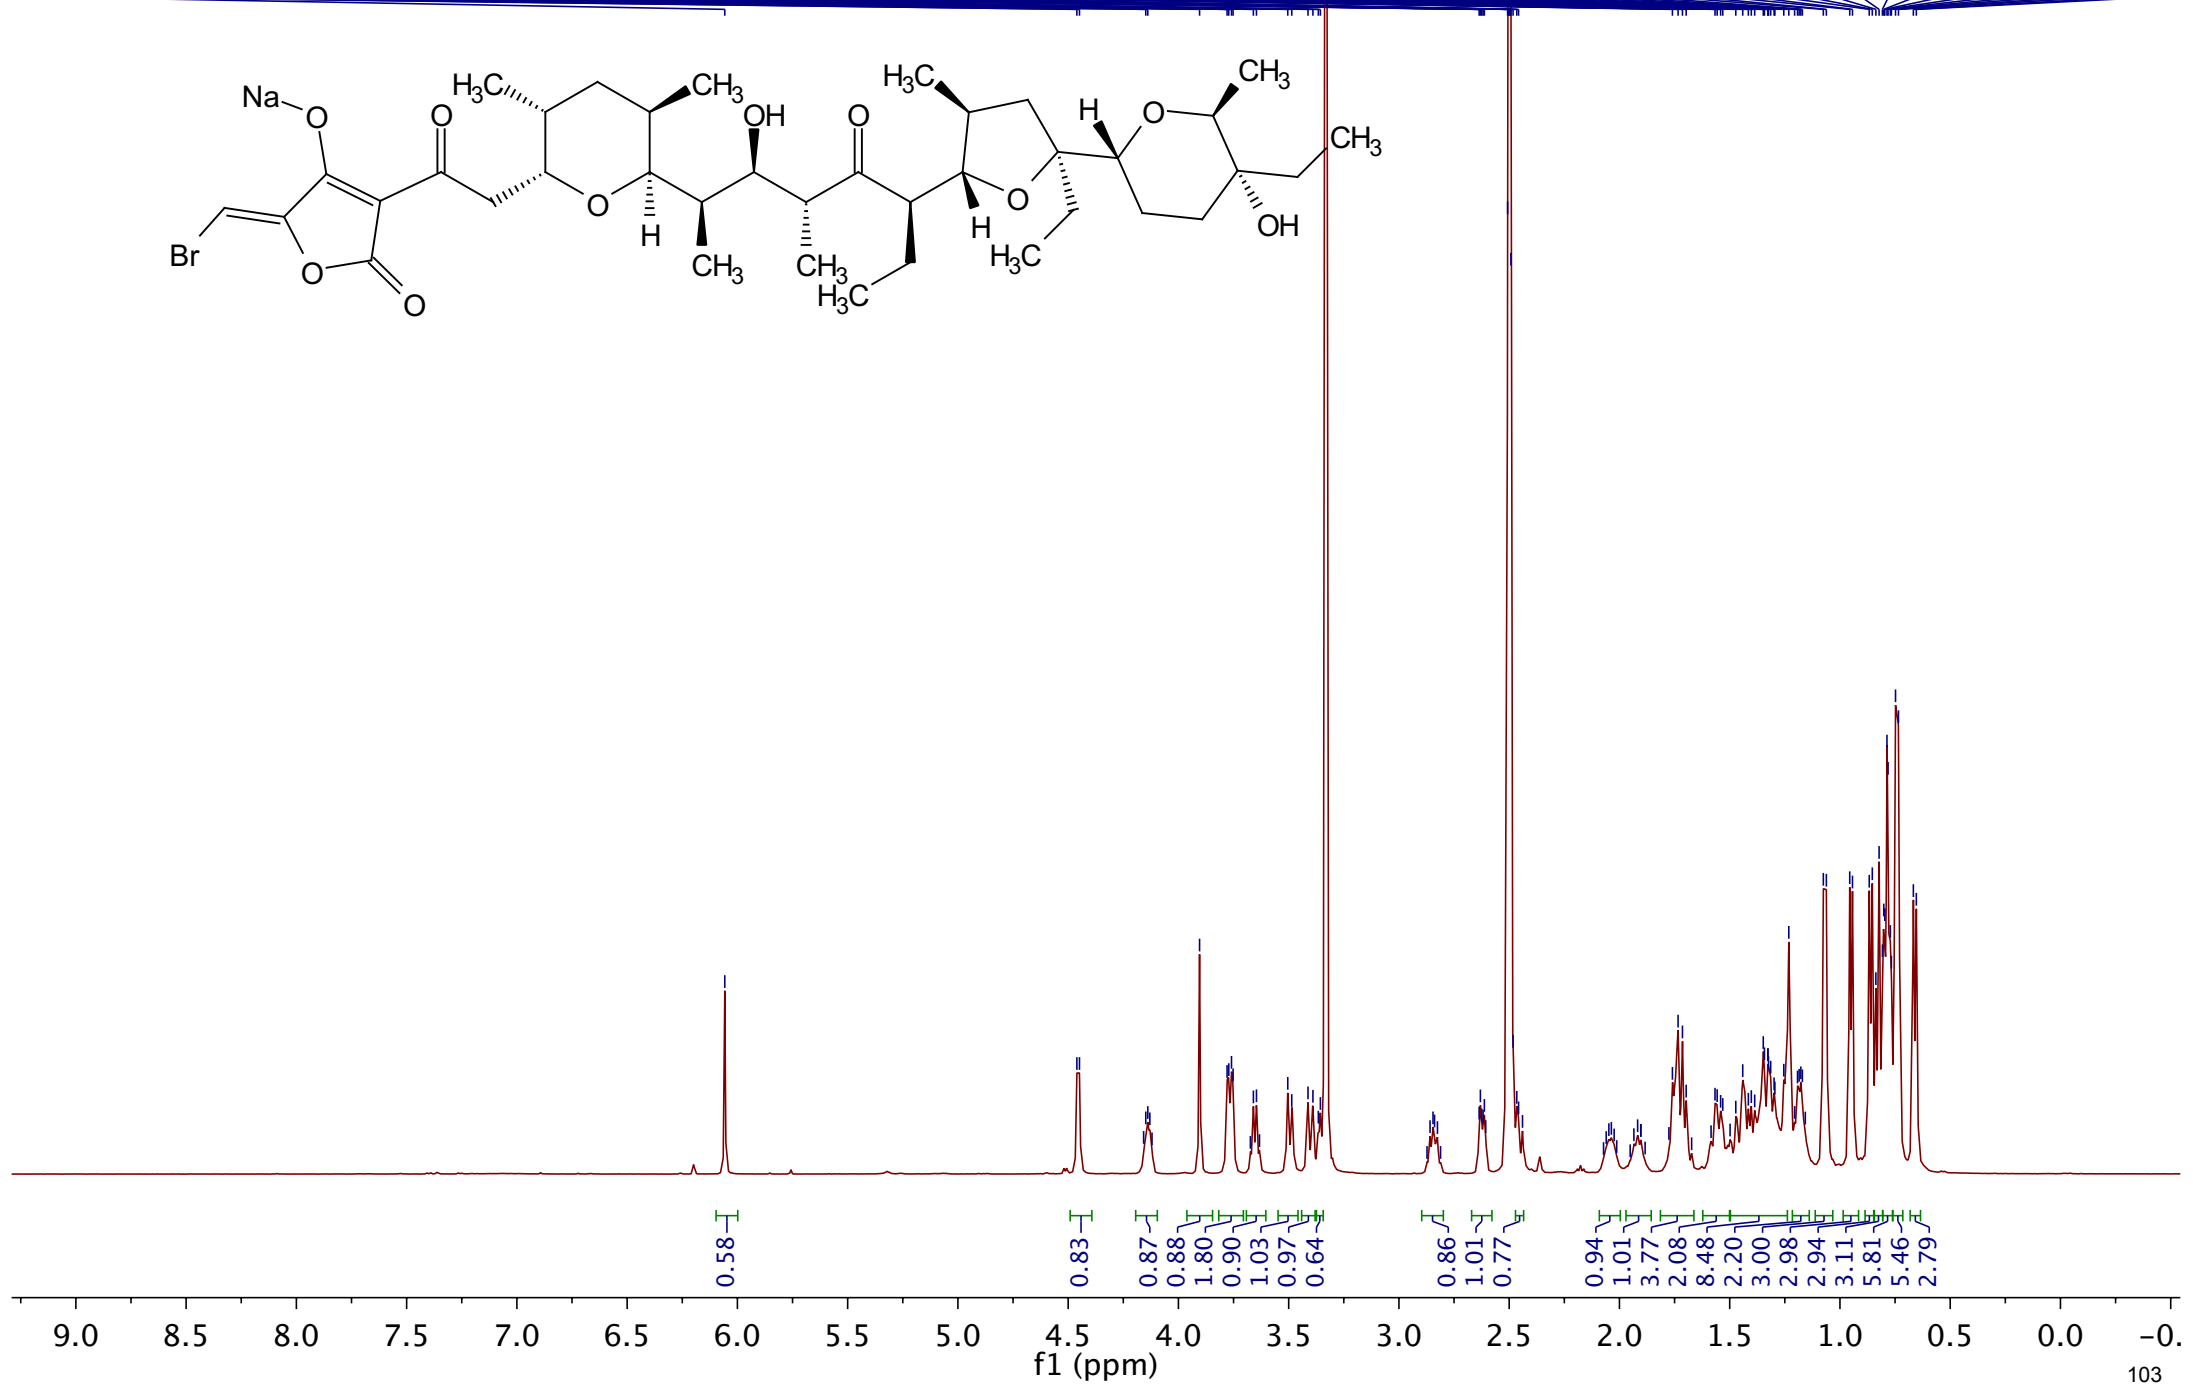

Compound 29

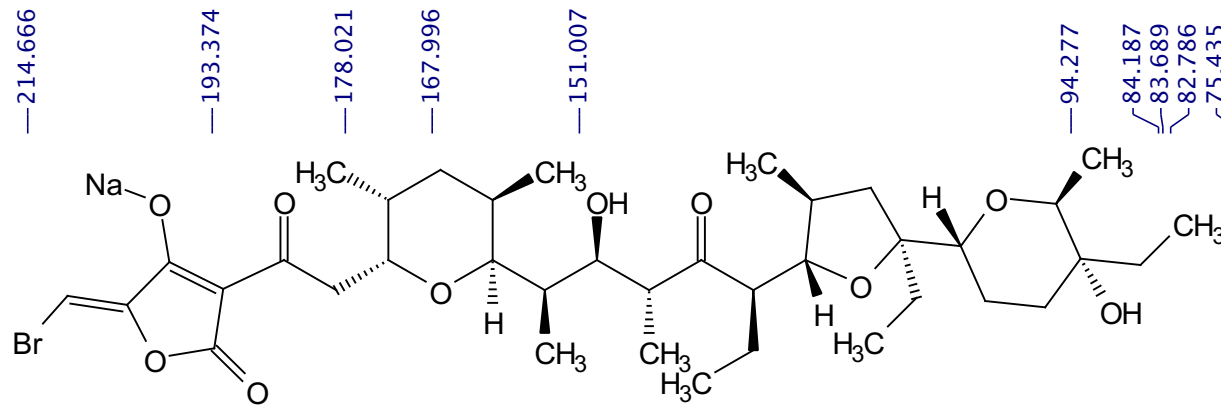

- 214.666
- 193.374
- 178.021
- 167.996
- 151.007
- 94.277
- 84.187
- 83.689
- 82.786
- 75.435
- 74.693
- 72.423
- 70.729
- 69.638
- 69.490
- 56.184
- 46.141
- 40.146
- 39.937
- 39.729
- 39.520
- 39.312
- 39.104
- 38.894
- 35.823
- 35.700
- 31.405
- 28.390
- 27.482
- 17.340
- 15.717
- 14.514
- 13.288
- 12.894
- 11.893
- 7.858
- 7.319
- 6.305

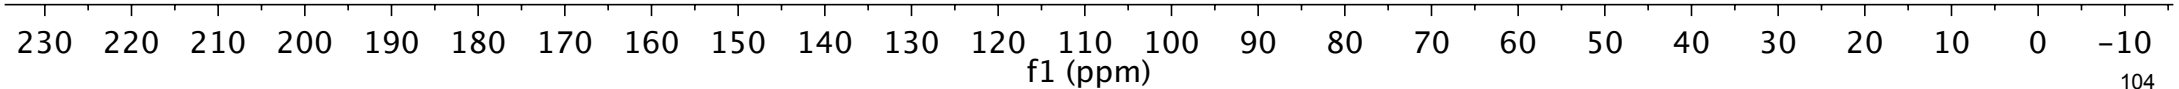



Compound 30

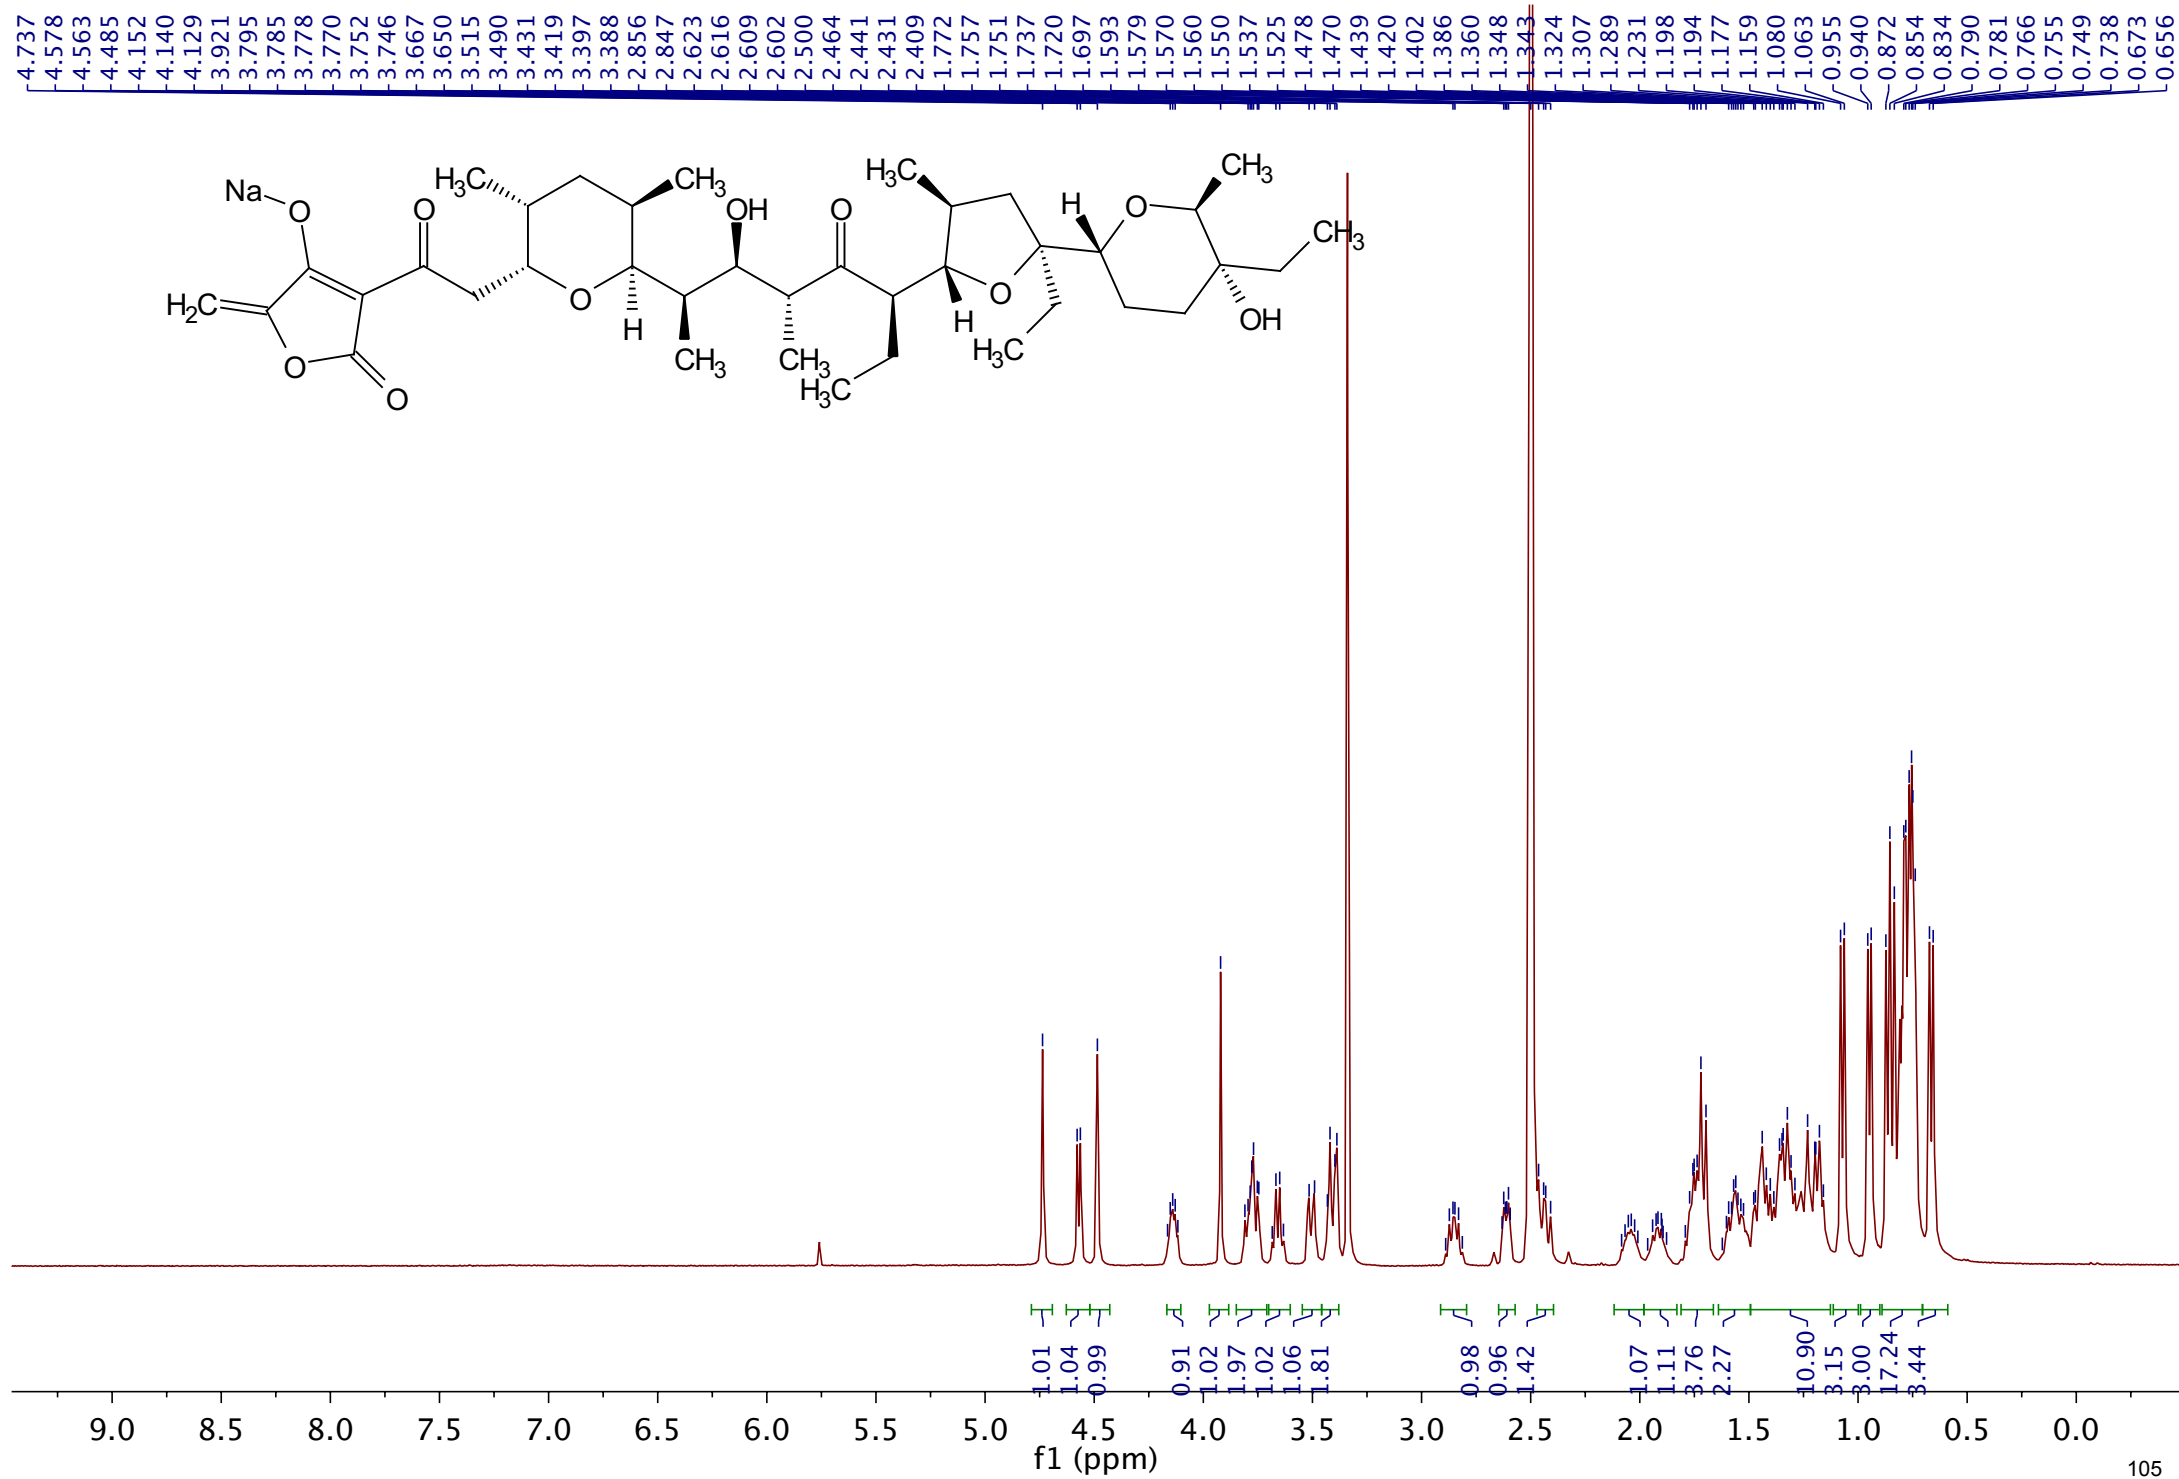

Compound 30

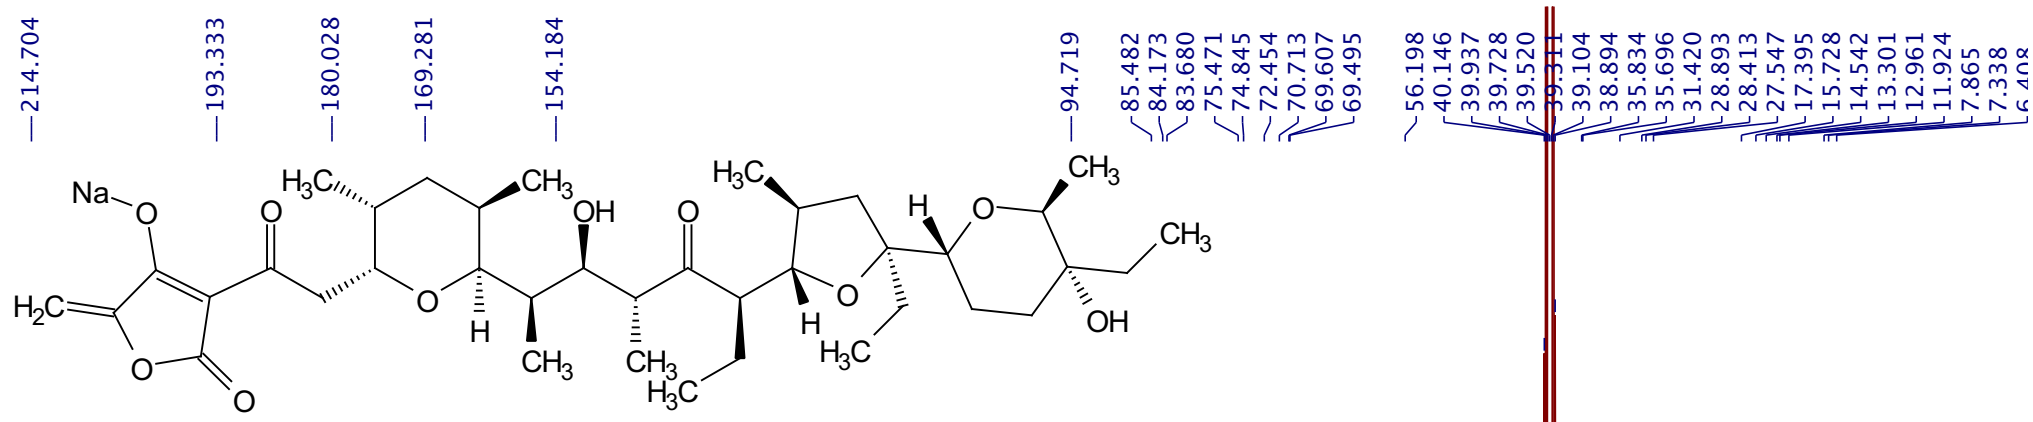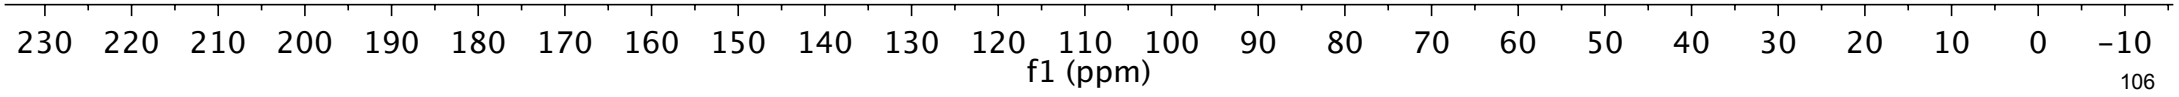

Compound 31

4.629  
3.874  
3.773  
3.758  
3.741  
3.639  
3.625  
3.614  
3.607  
3.596  
3.589  
3.488  
3.468  
3.377  
3.364  
3.332  
3.326  
2.785  
2.772  
2.765  
2.752  
2.538  
2.525  
2.521  
2.500  
2.036  
2.024  
1.843  
1.829  
1.804  
1.779  
1.764  
1.753  
1.739  
1.724  
1.709  
1.697  
1.607  
1.607  
1.585  
1.584  
1.565  
1.549  
1.540  
1.522  
1.434  
1.419  
1.405  
1.376  
1.361  
1.347  
1.319  
1.238  
1.230  
1.221  
1.209  
1.194  
1.186  
1.179  
1.171  
1.158  
1.085  
1.071  
1.063  
1.050  
0.914  
0.902  
0.806  
0.800  
0.791  
0.785  
0.776  
0.771  
0.738  
0.724  
0.709  
0.659  
0.645

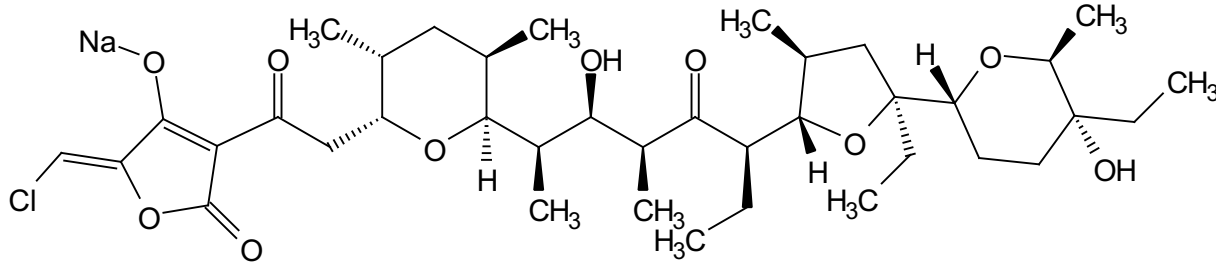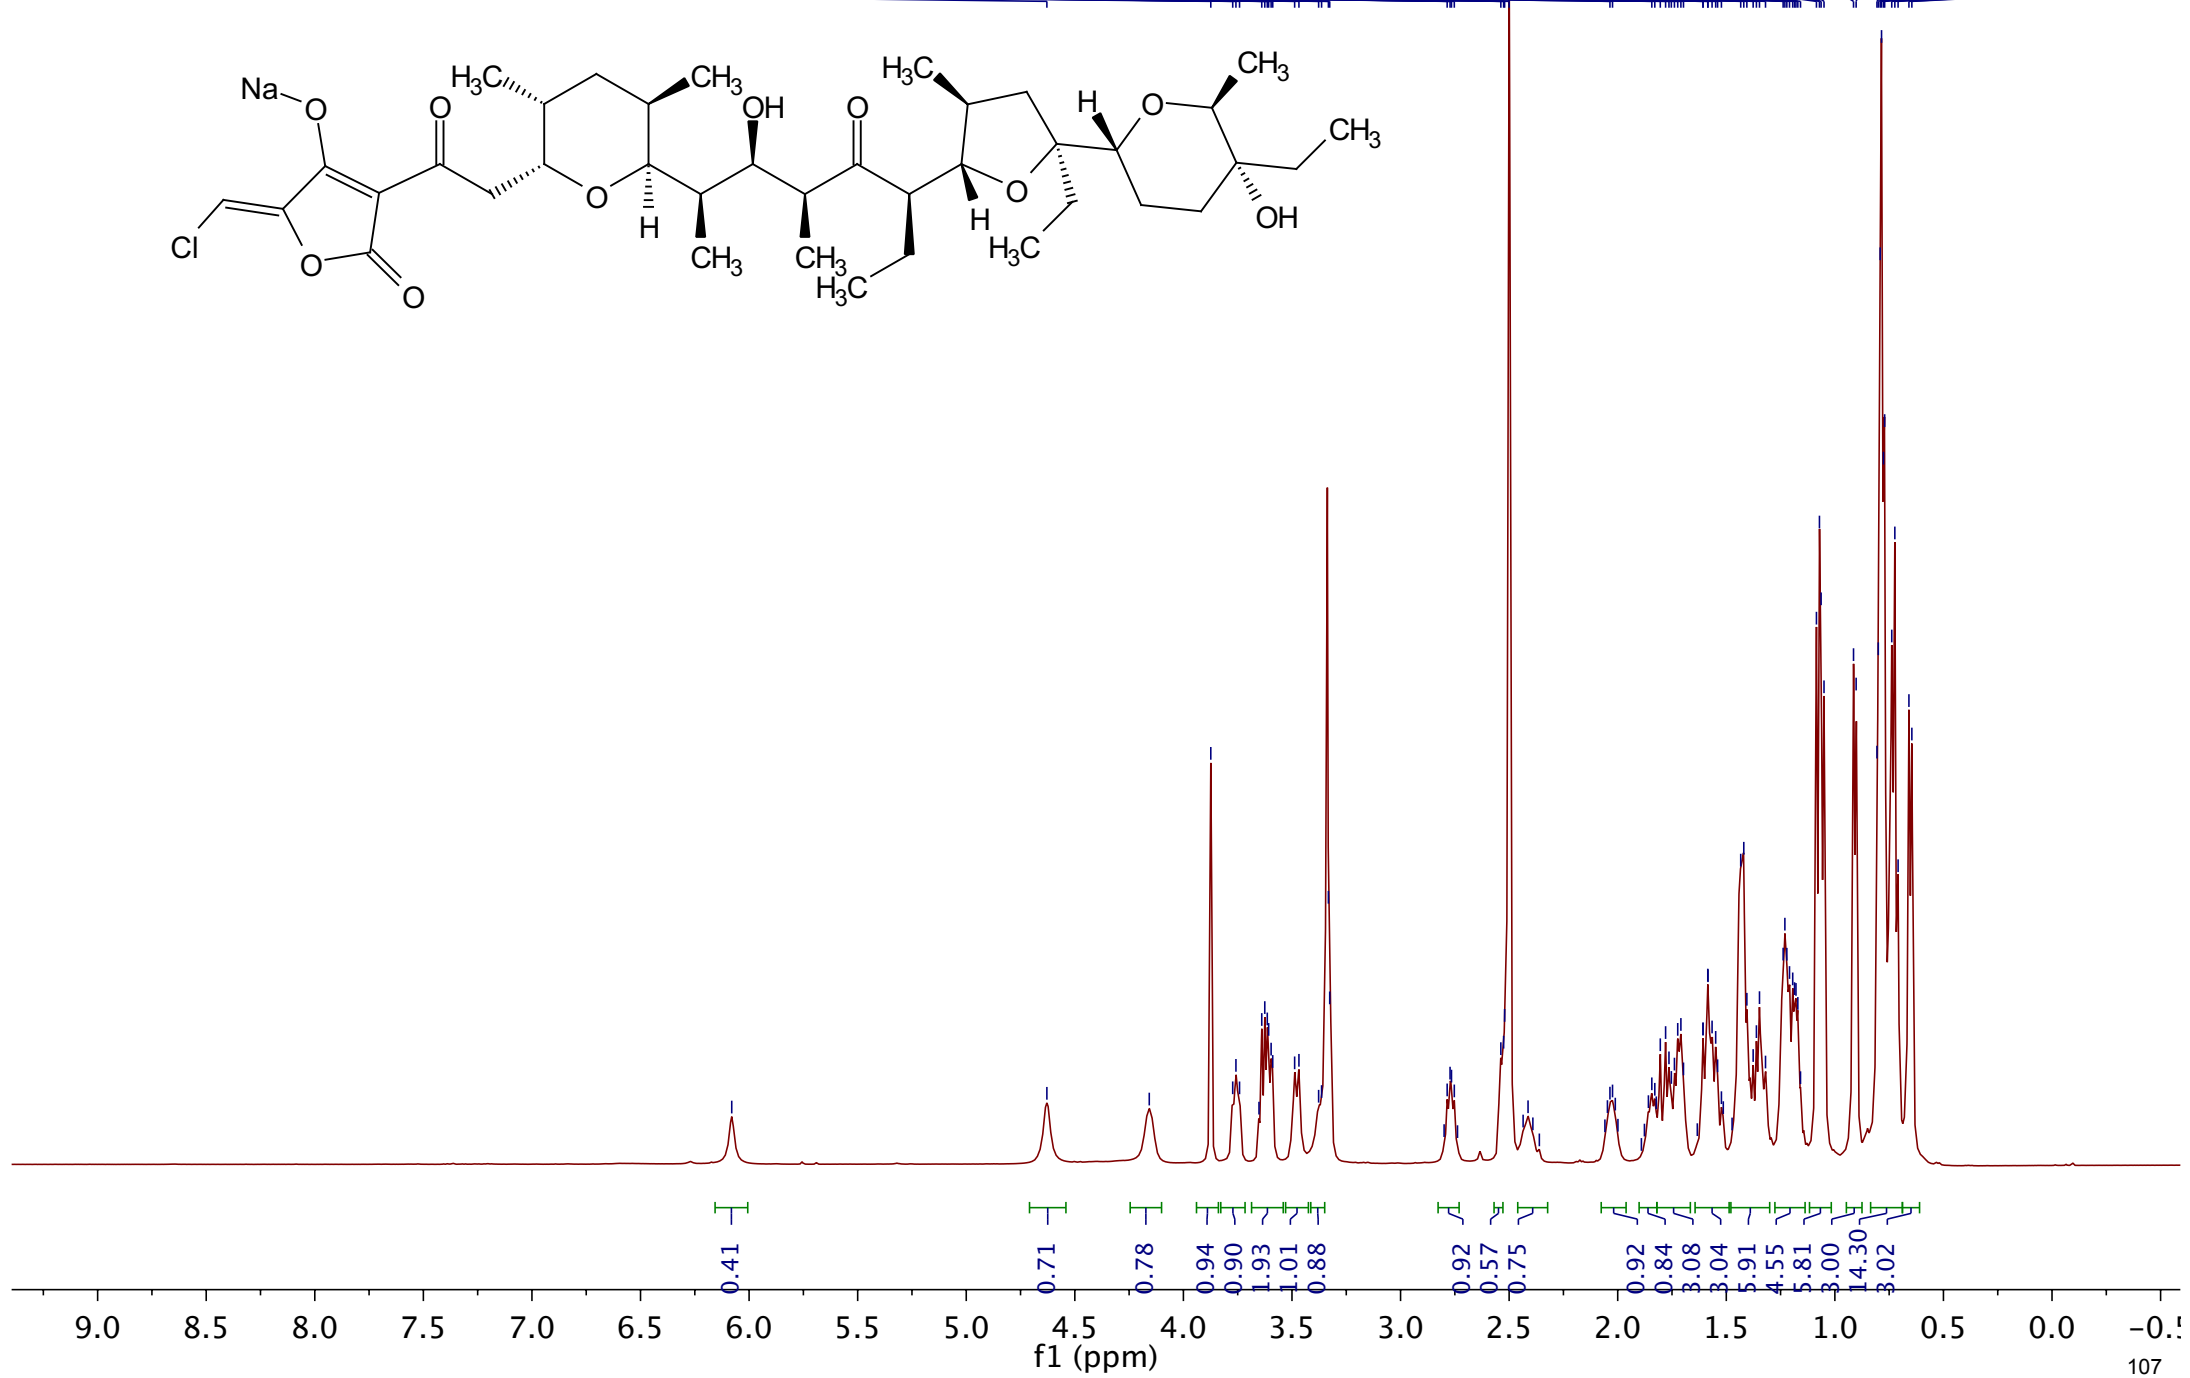

Compound 31

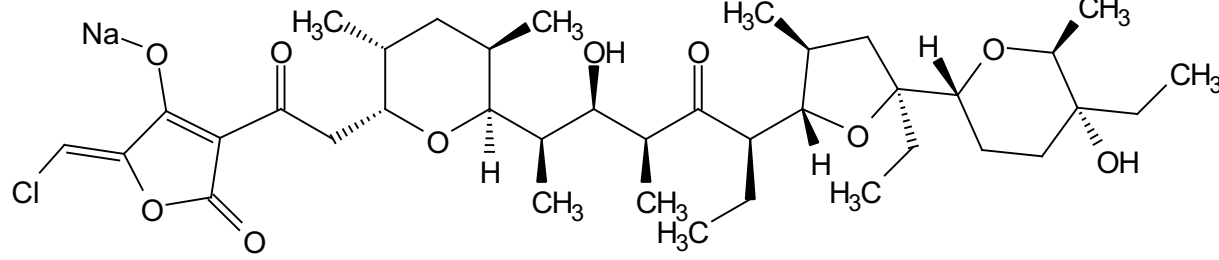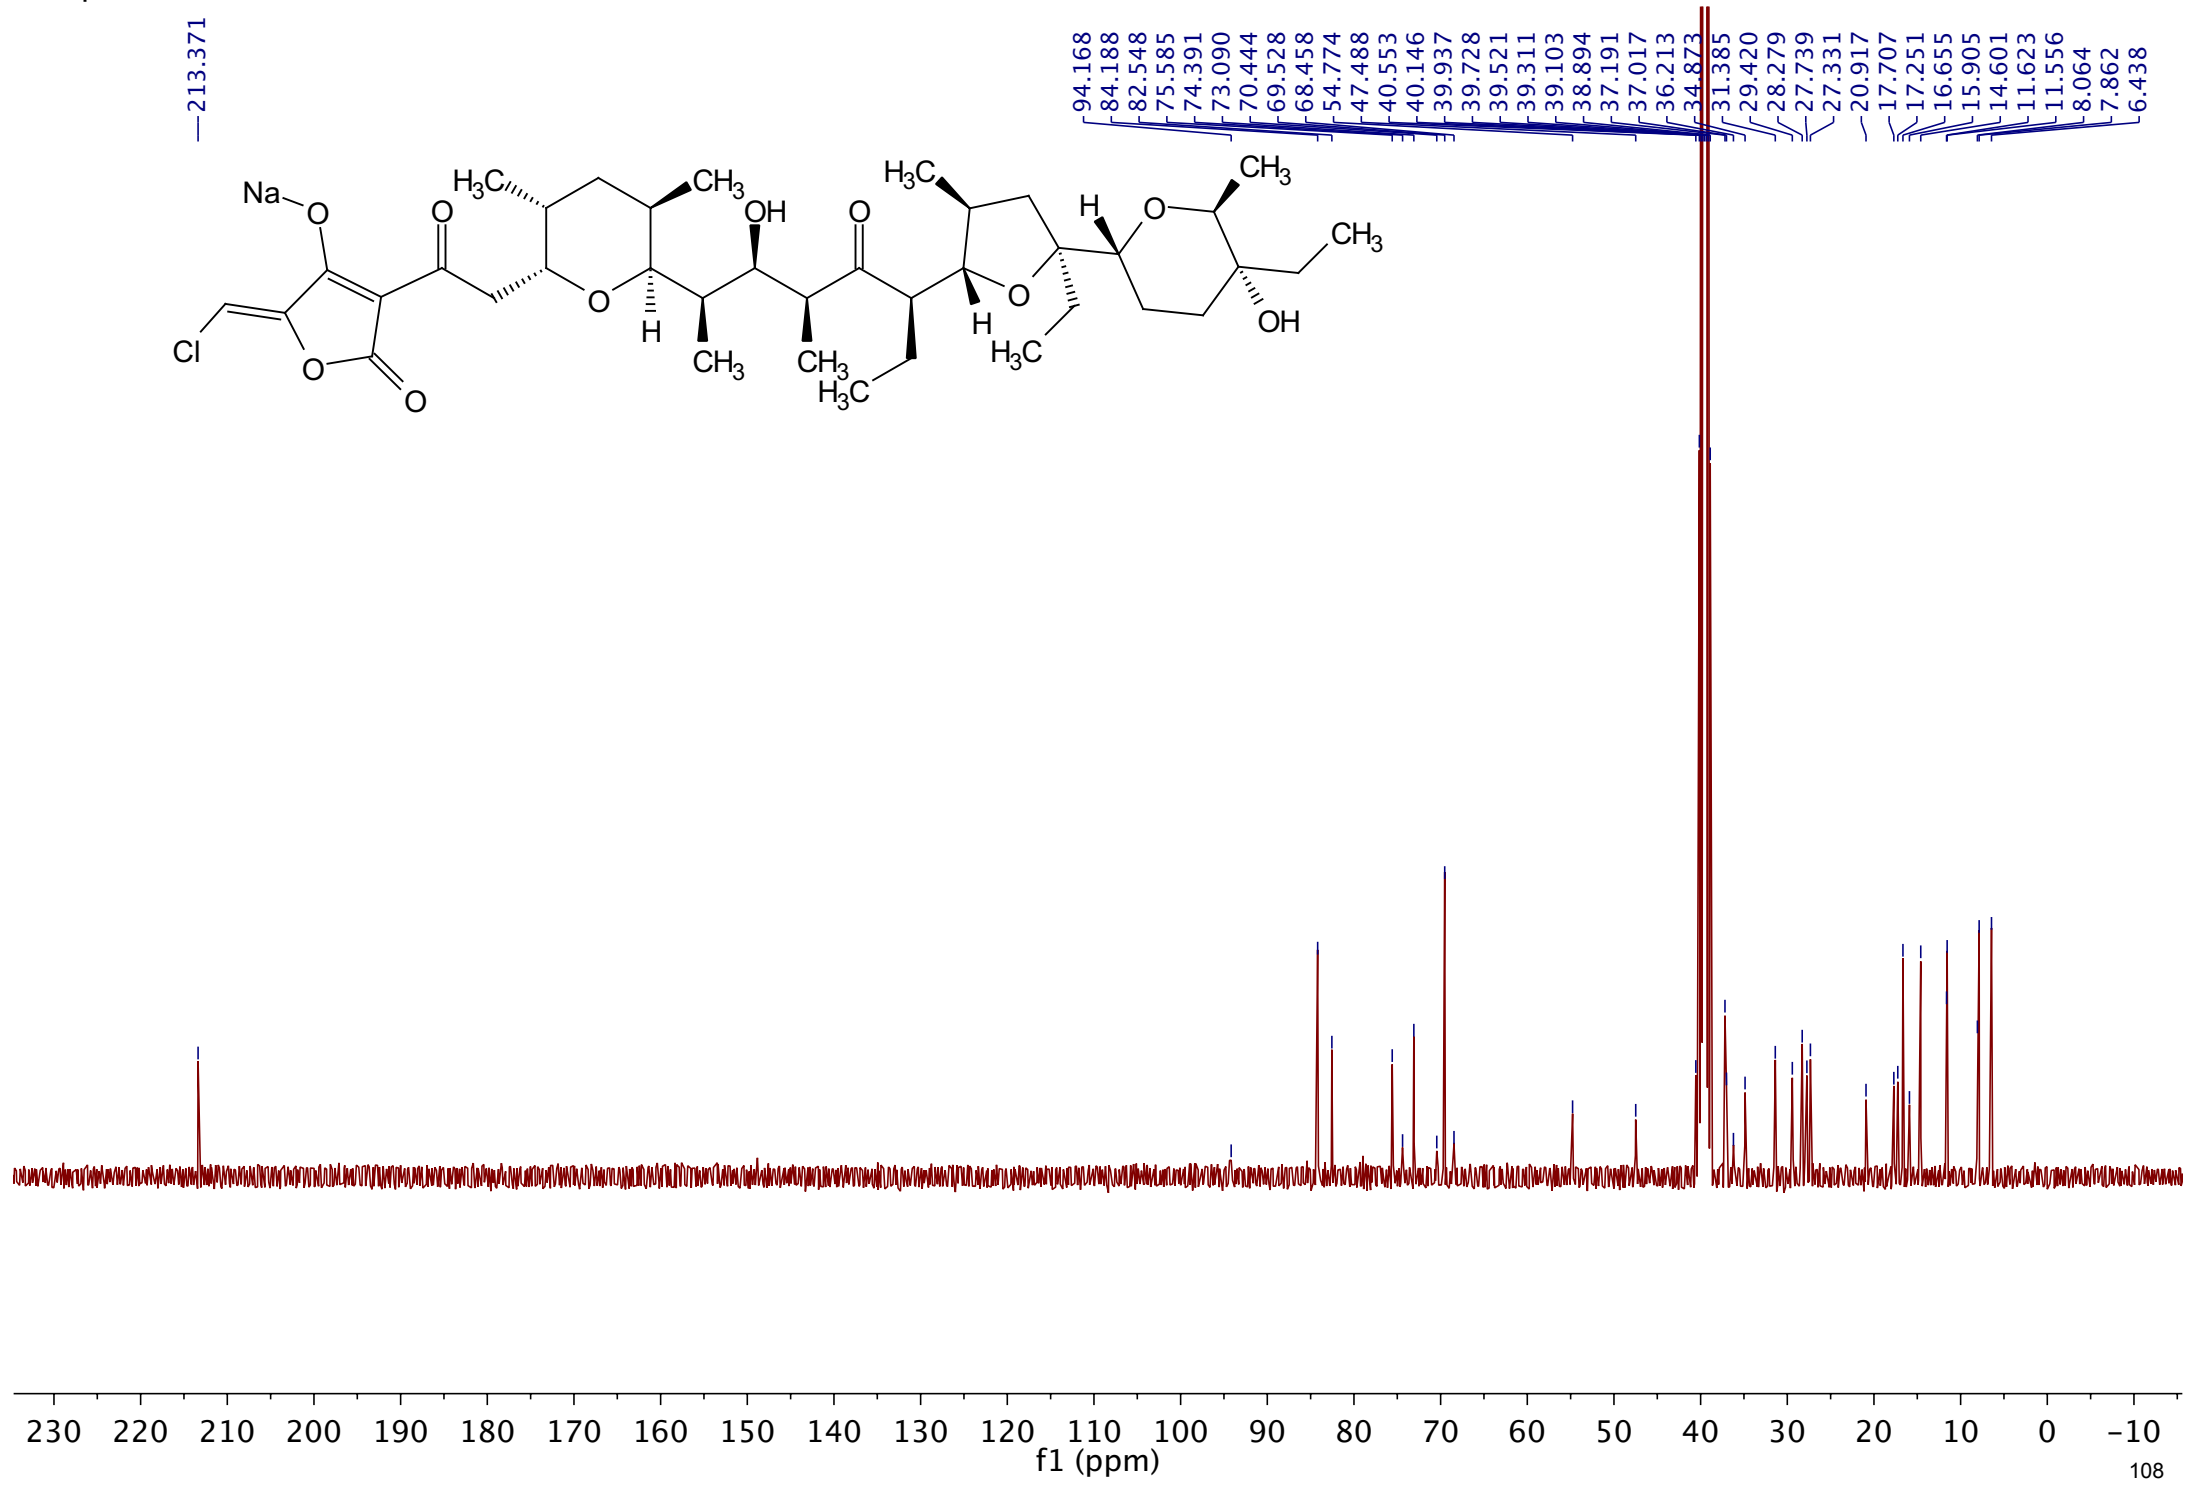

Compound 32

6.064  
4.183  
4.169  
4.168  
4.157  
4.132  
4.116  
3.898  
3.880  
3.856  
3.856  
3.793  
3.768  
3.666  
3.649  
3.560  
3.544  
3.535  
3.511  
3.487  
3.438  
3.412  
3.407  
3.370  
3.353  
3.329  
2.499  
2.461  
2.432  
2.038  
2.034  
1.941  
1.923  
1.905  
1.830  
1.810  
1.799  
1.779  
1.736  
1.682  
1.665  
1.655  
1.639  
1.619  
1.609  
1.586  
1.575  
1.555  
1.518  
1.499  
1.484  
1.435  
1.415  
1.399  
1.360  
1.332  
1.233  
1.211  
1.192  
1.173  
1.120  
1.103  
0.912  
0.897  
0.879  
0.861  
0.850  
0.843  
0.833  
0.816  
0.799  
0.780  
0.732  
0.715  
0.621  
0.604  
0.592  
0.575

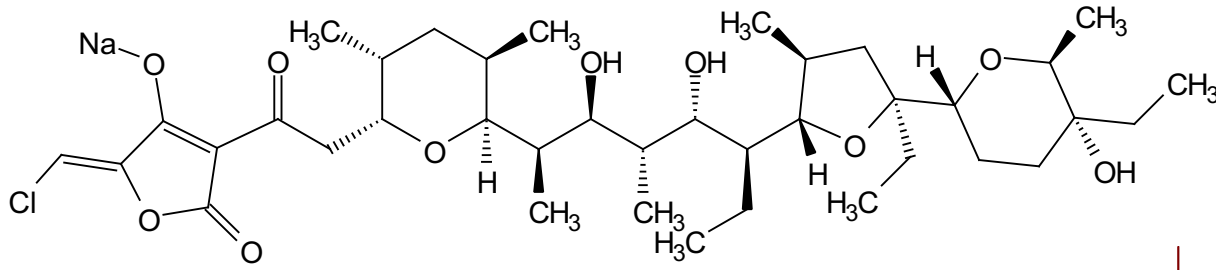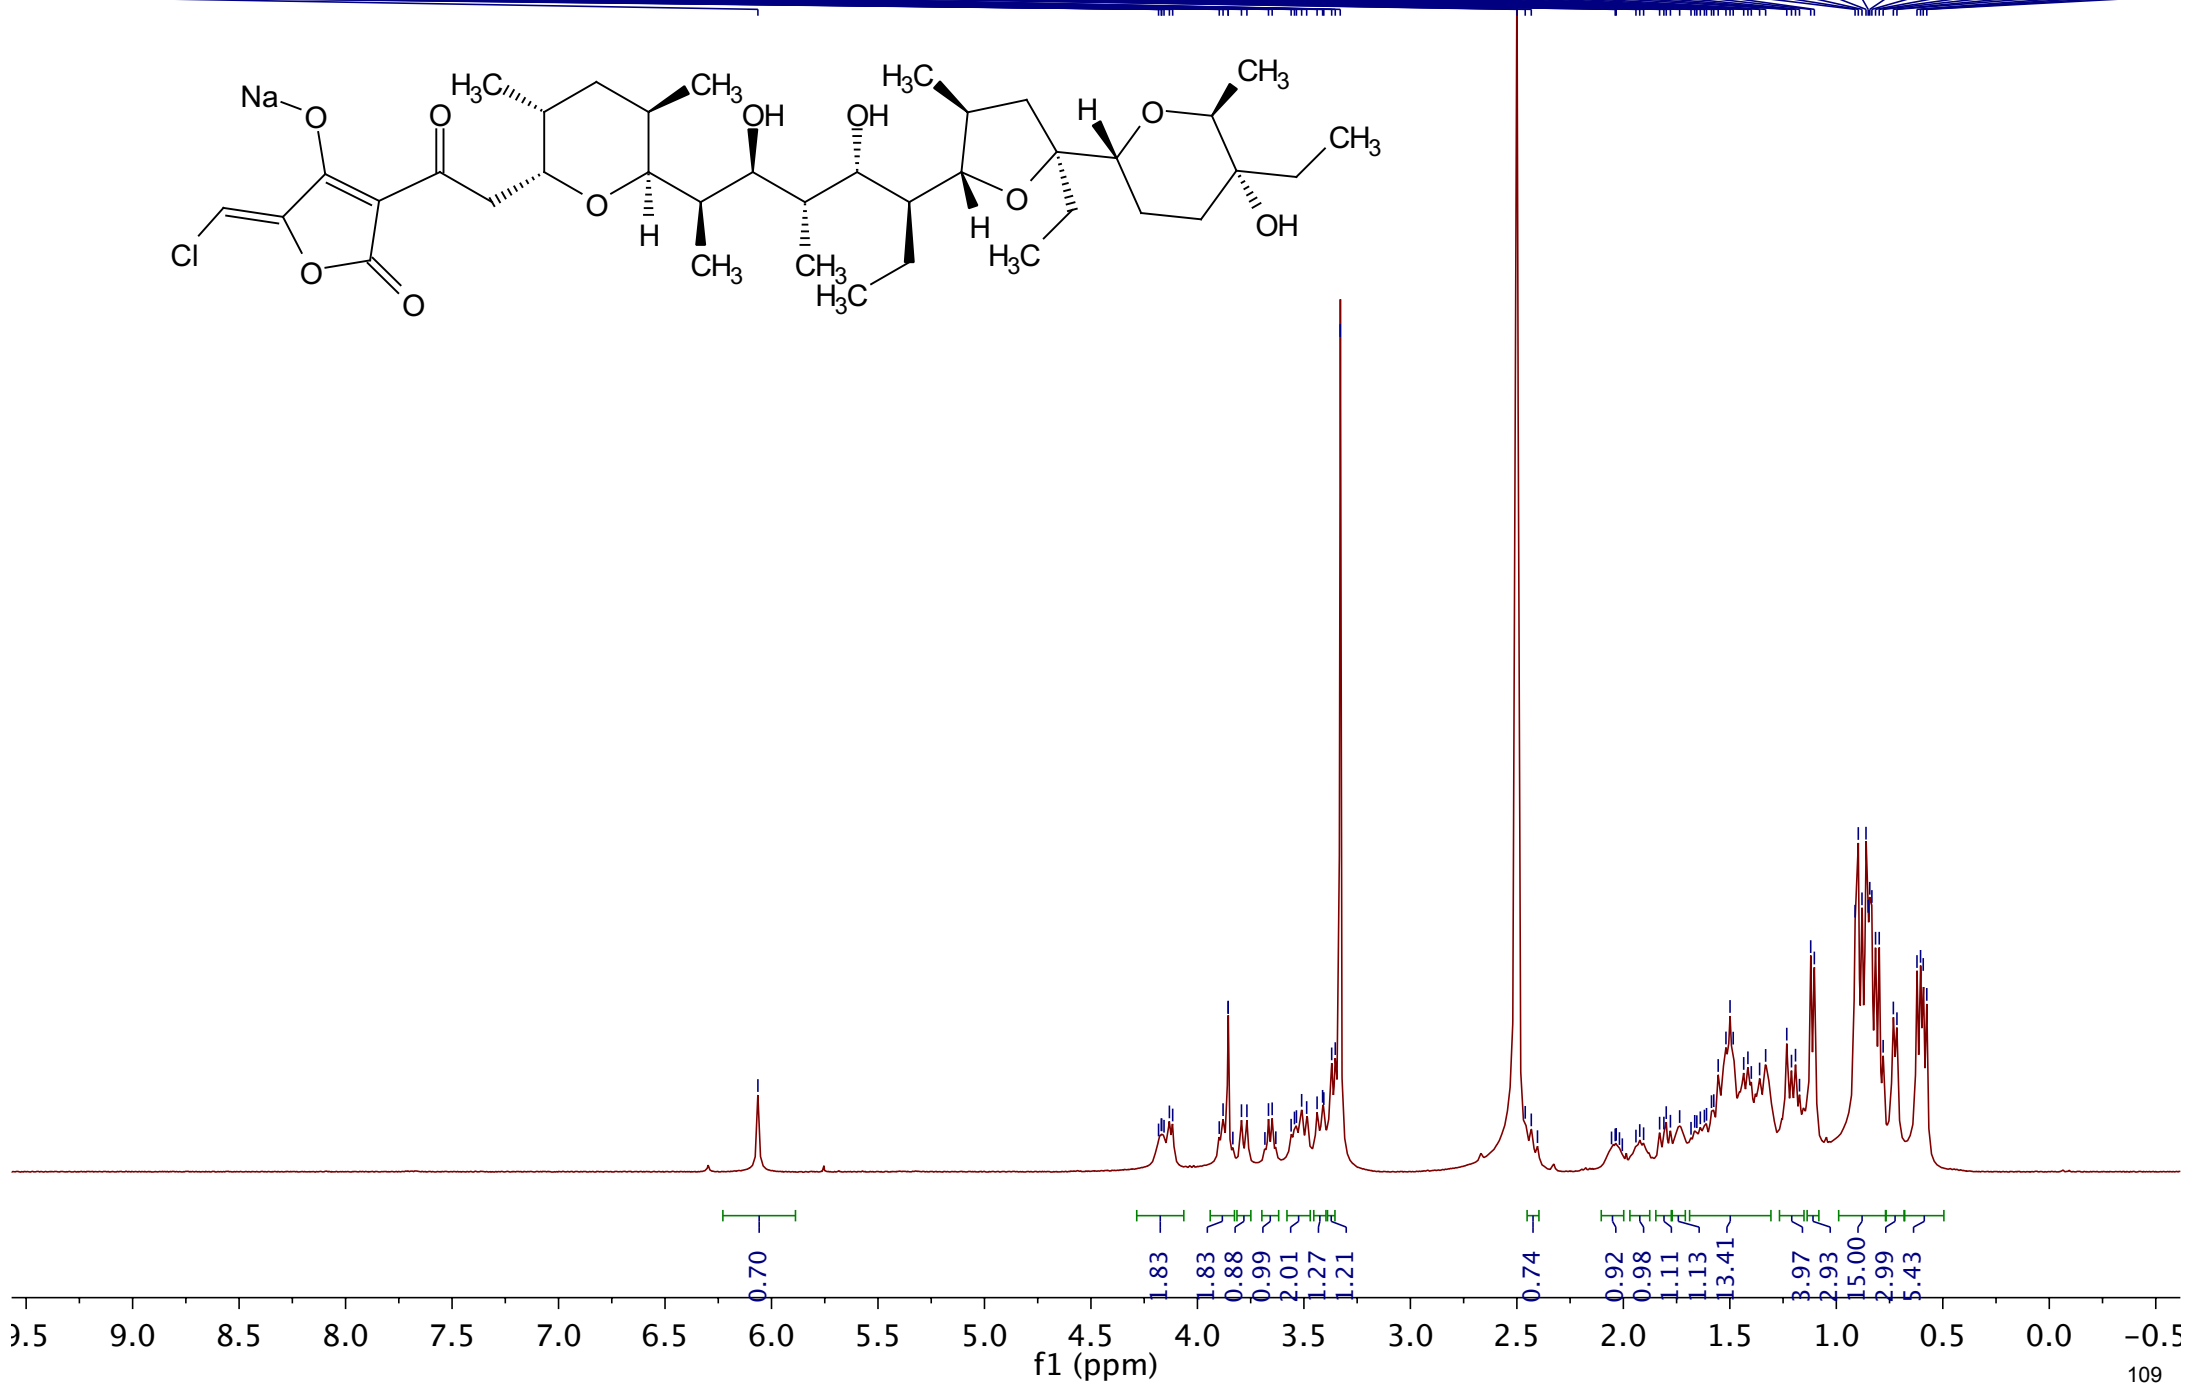

Compound 32

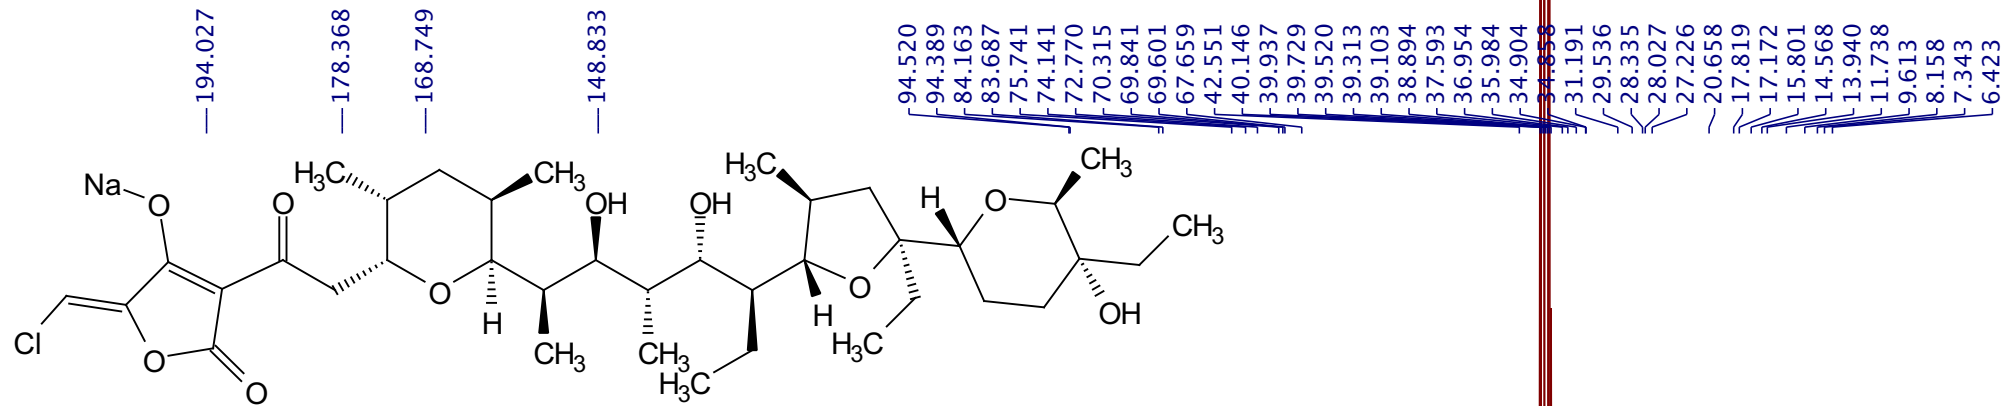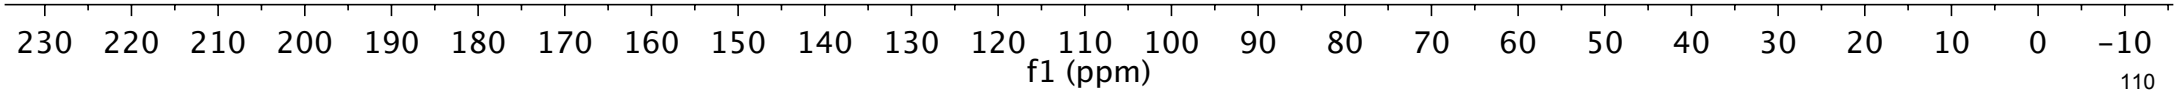

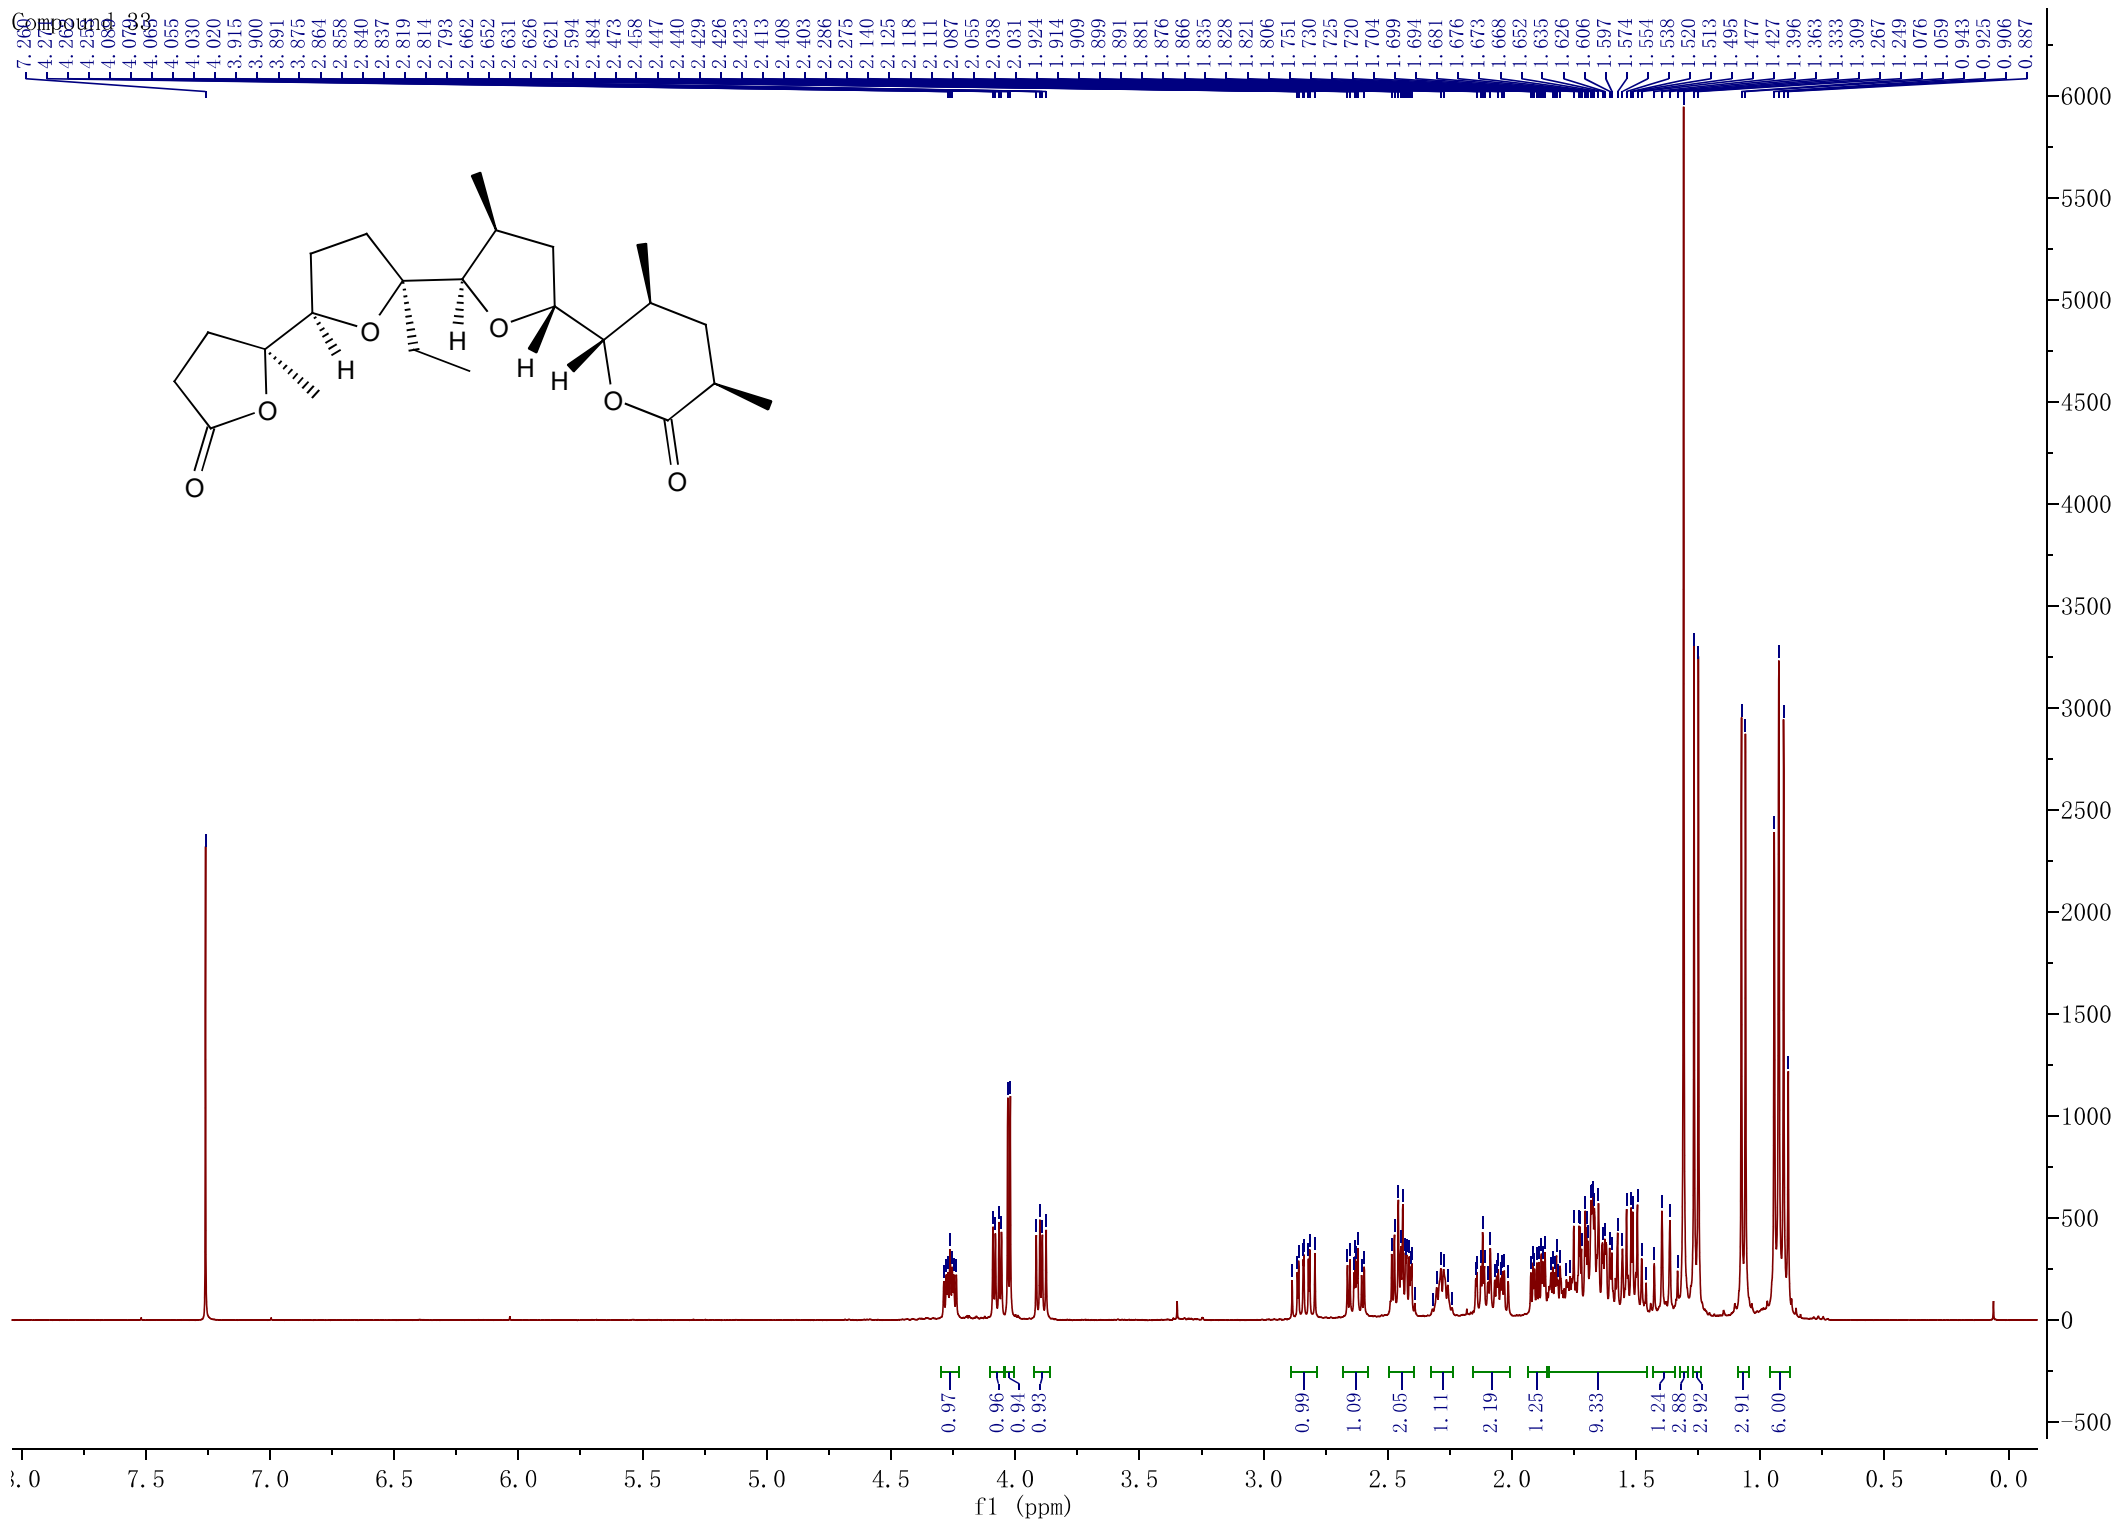

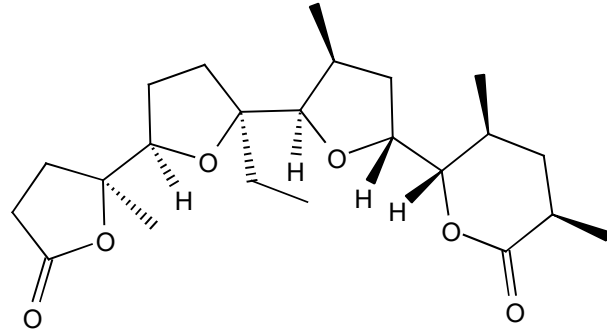

177.982  
174.048

88.345  
88.125  
87.468  
86.779  
82.722  
77.479  
77.450  
77.160  
76.842

37.498  
36.166  
35.019  
34.941  
31.658  
30.393  
30.301  
29.988  
29.172  
28.334  
23.805  
18.414  
17.301  
15.732  
8.045

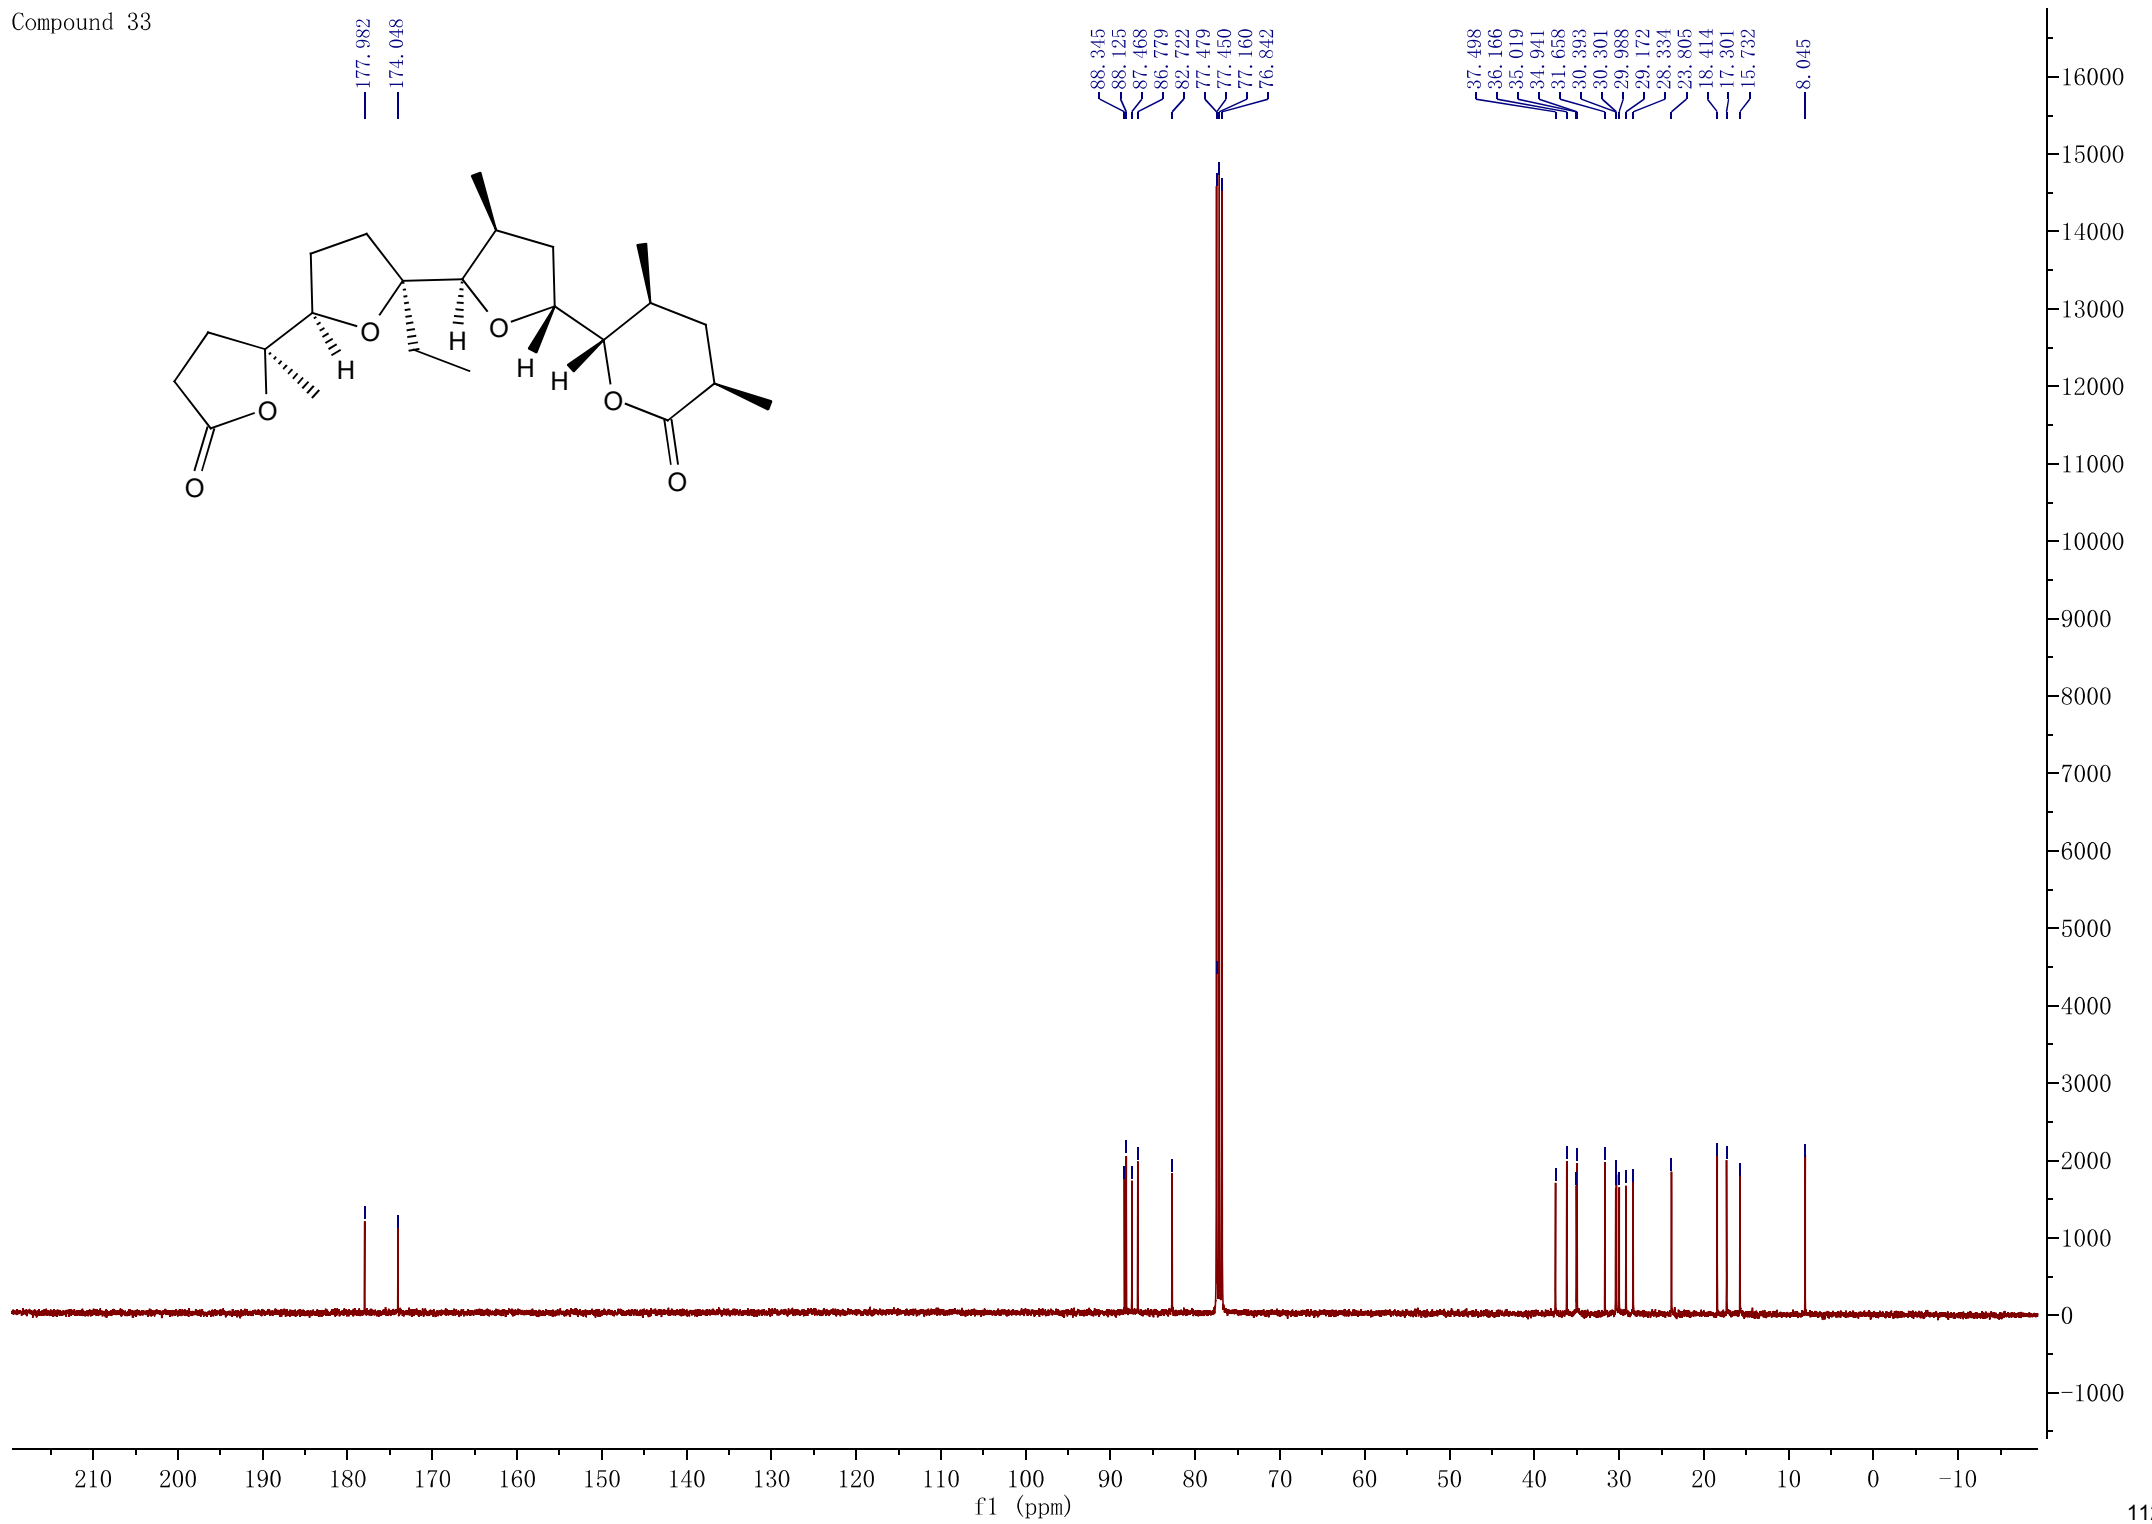



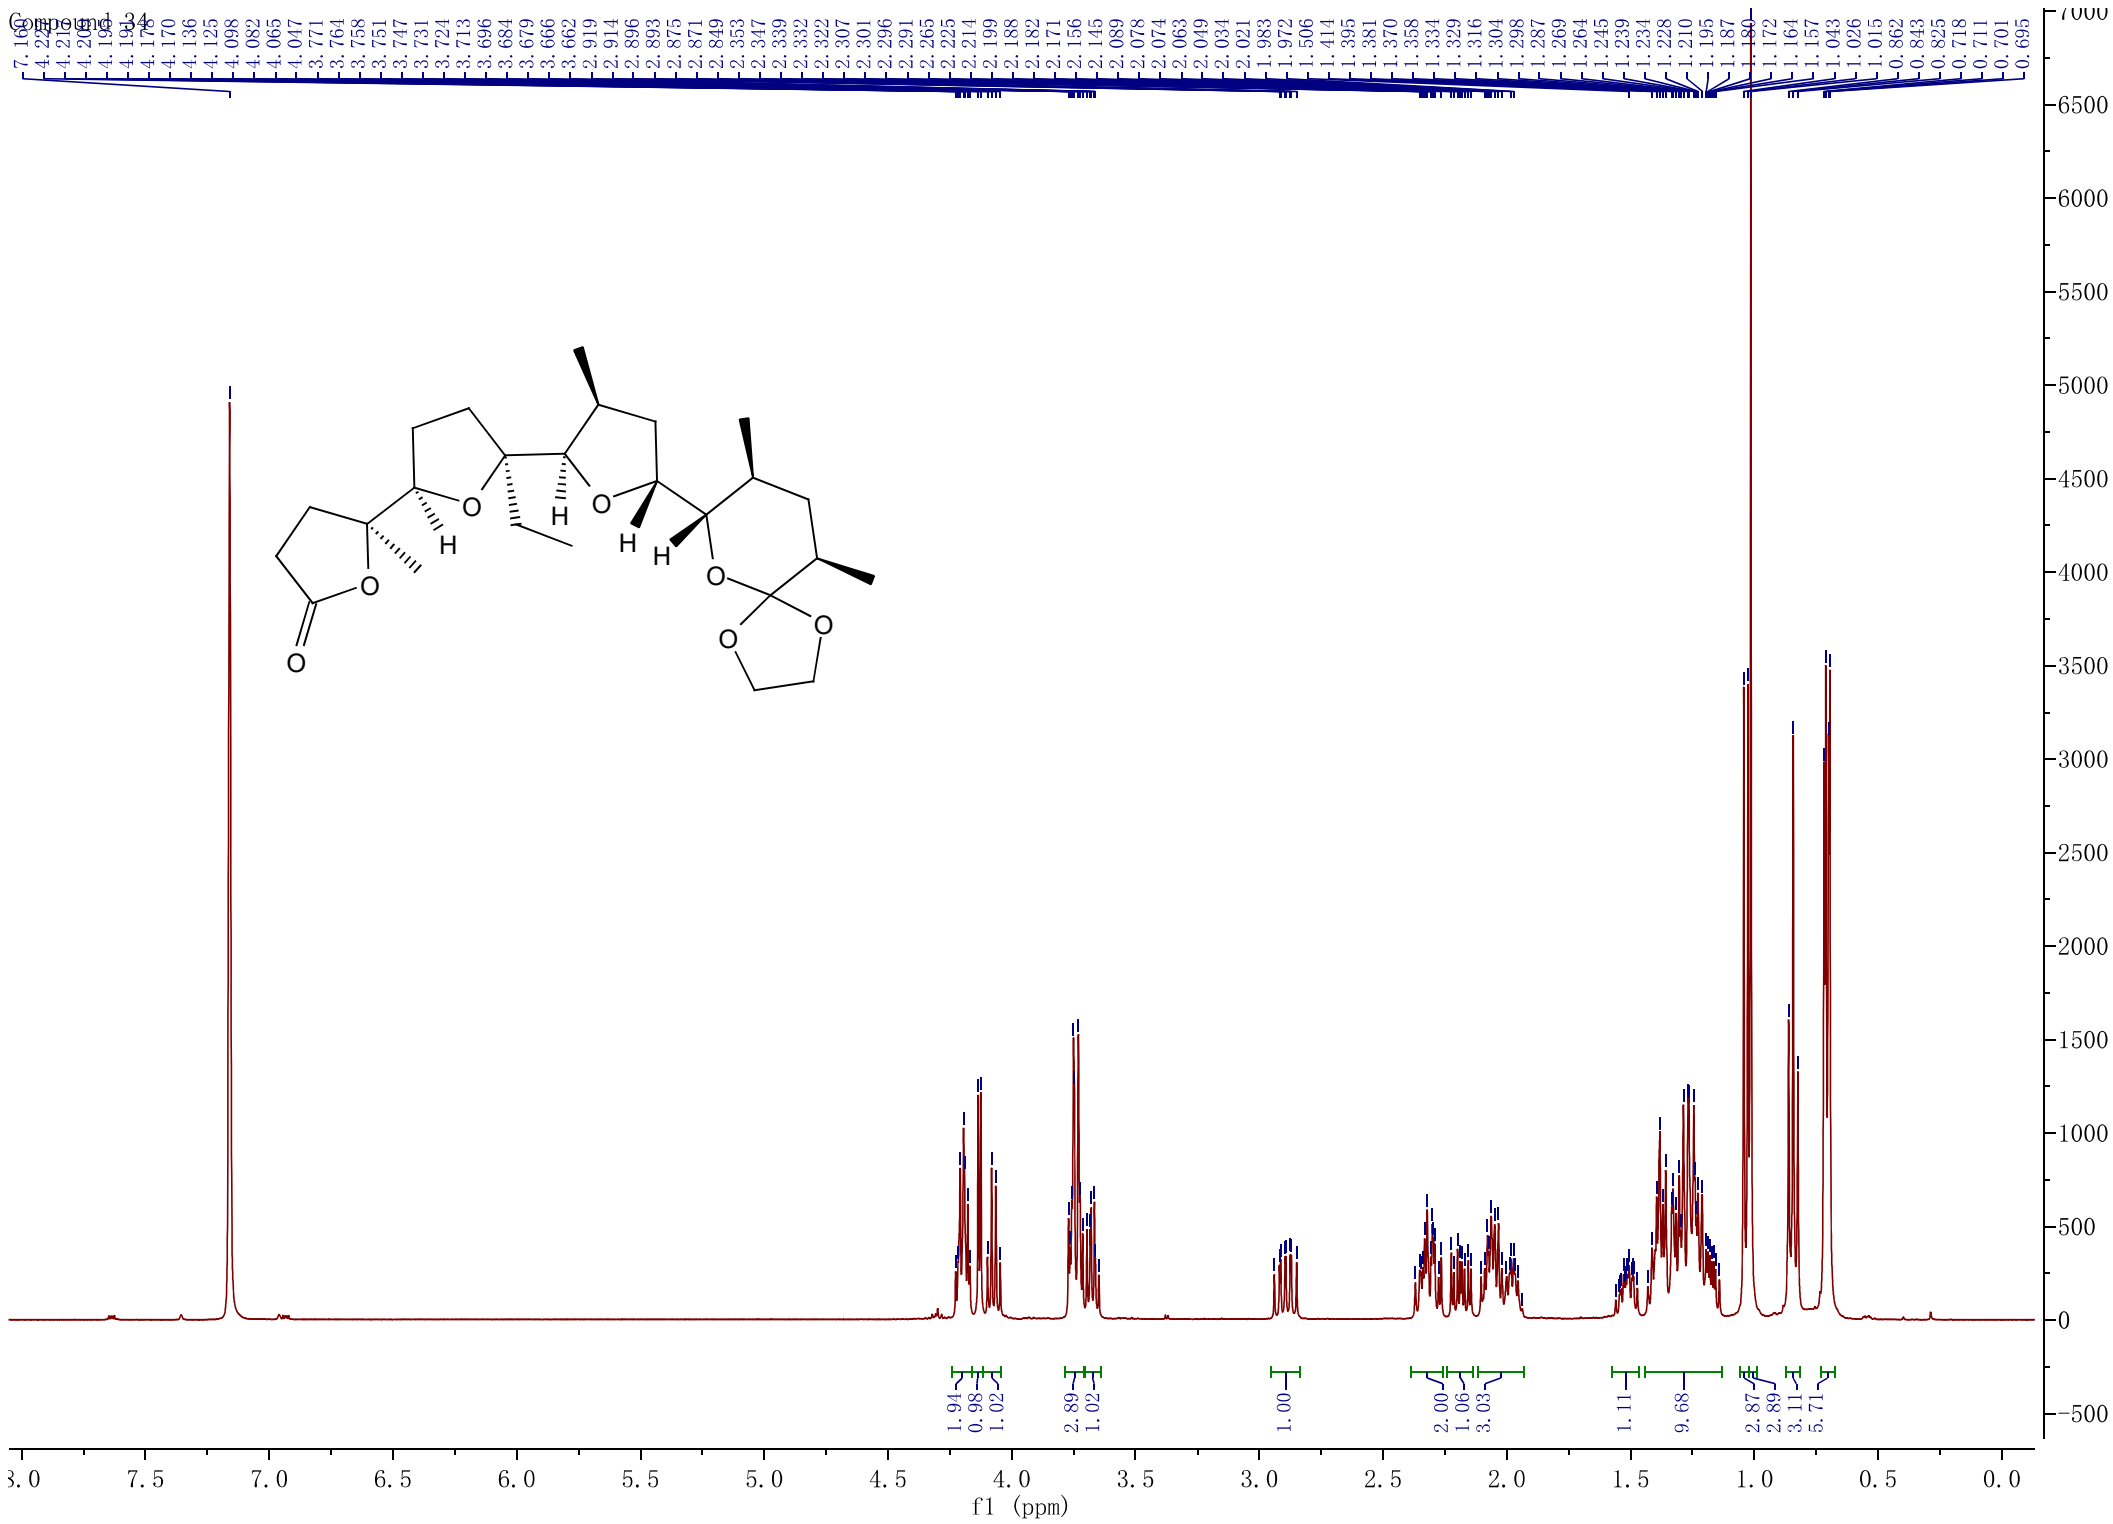

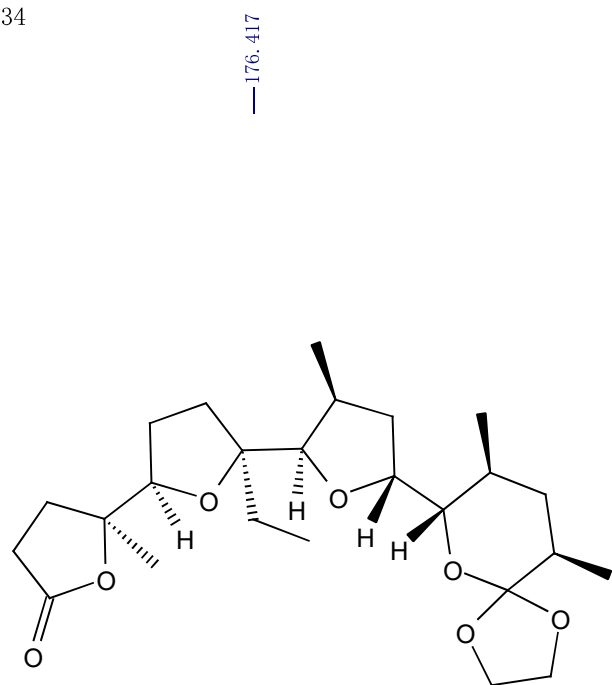

176.417

128.302

128.061

127.820

121.444

87.738

86.961

84.723

81.829

81.513

77.196

65.134

64.794

39.590

36.697

35.038

34.086

33.269

30.168

30.130

29.822

28.509

28.386

23.728

17.284

16.407

15.485

8.164

210

200

190

180

170

160

150

140

130

120

110

100

90

80

70

60

50

40

30

20

10

0

-10

f1 (ppm)

13000  
12000  
11000  
10000  
9000  
8000  
7000  
6000  
5000  
4000  
3000  
2000  
1000  
0  
-1000

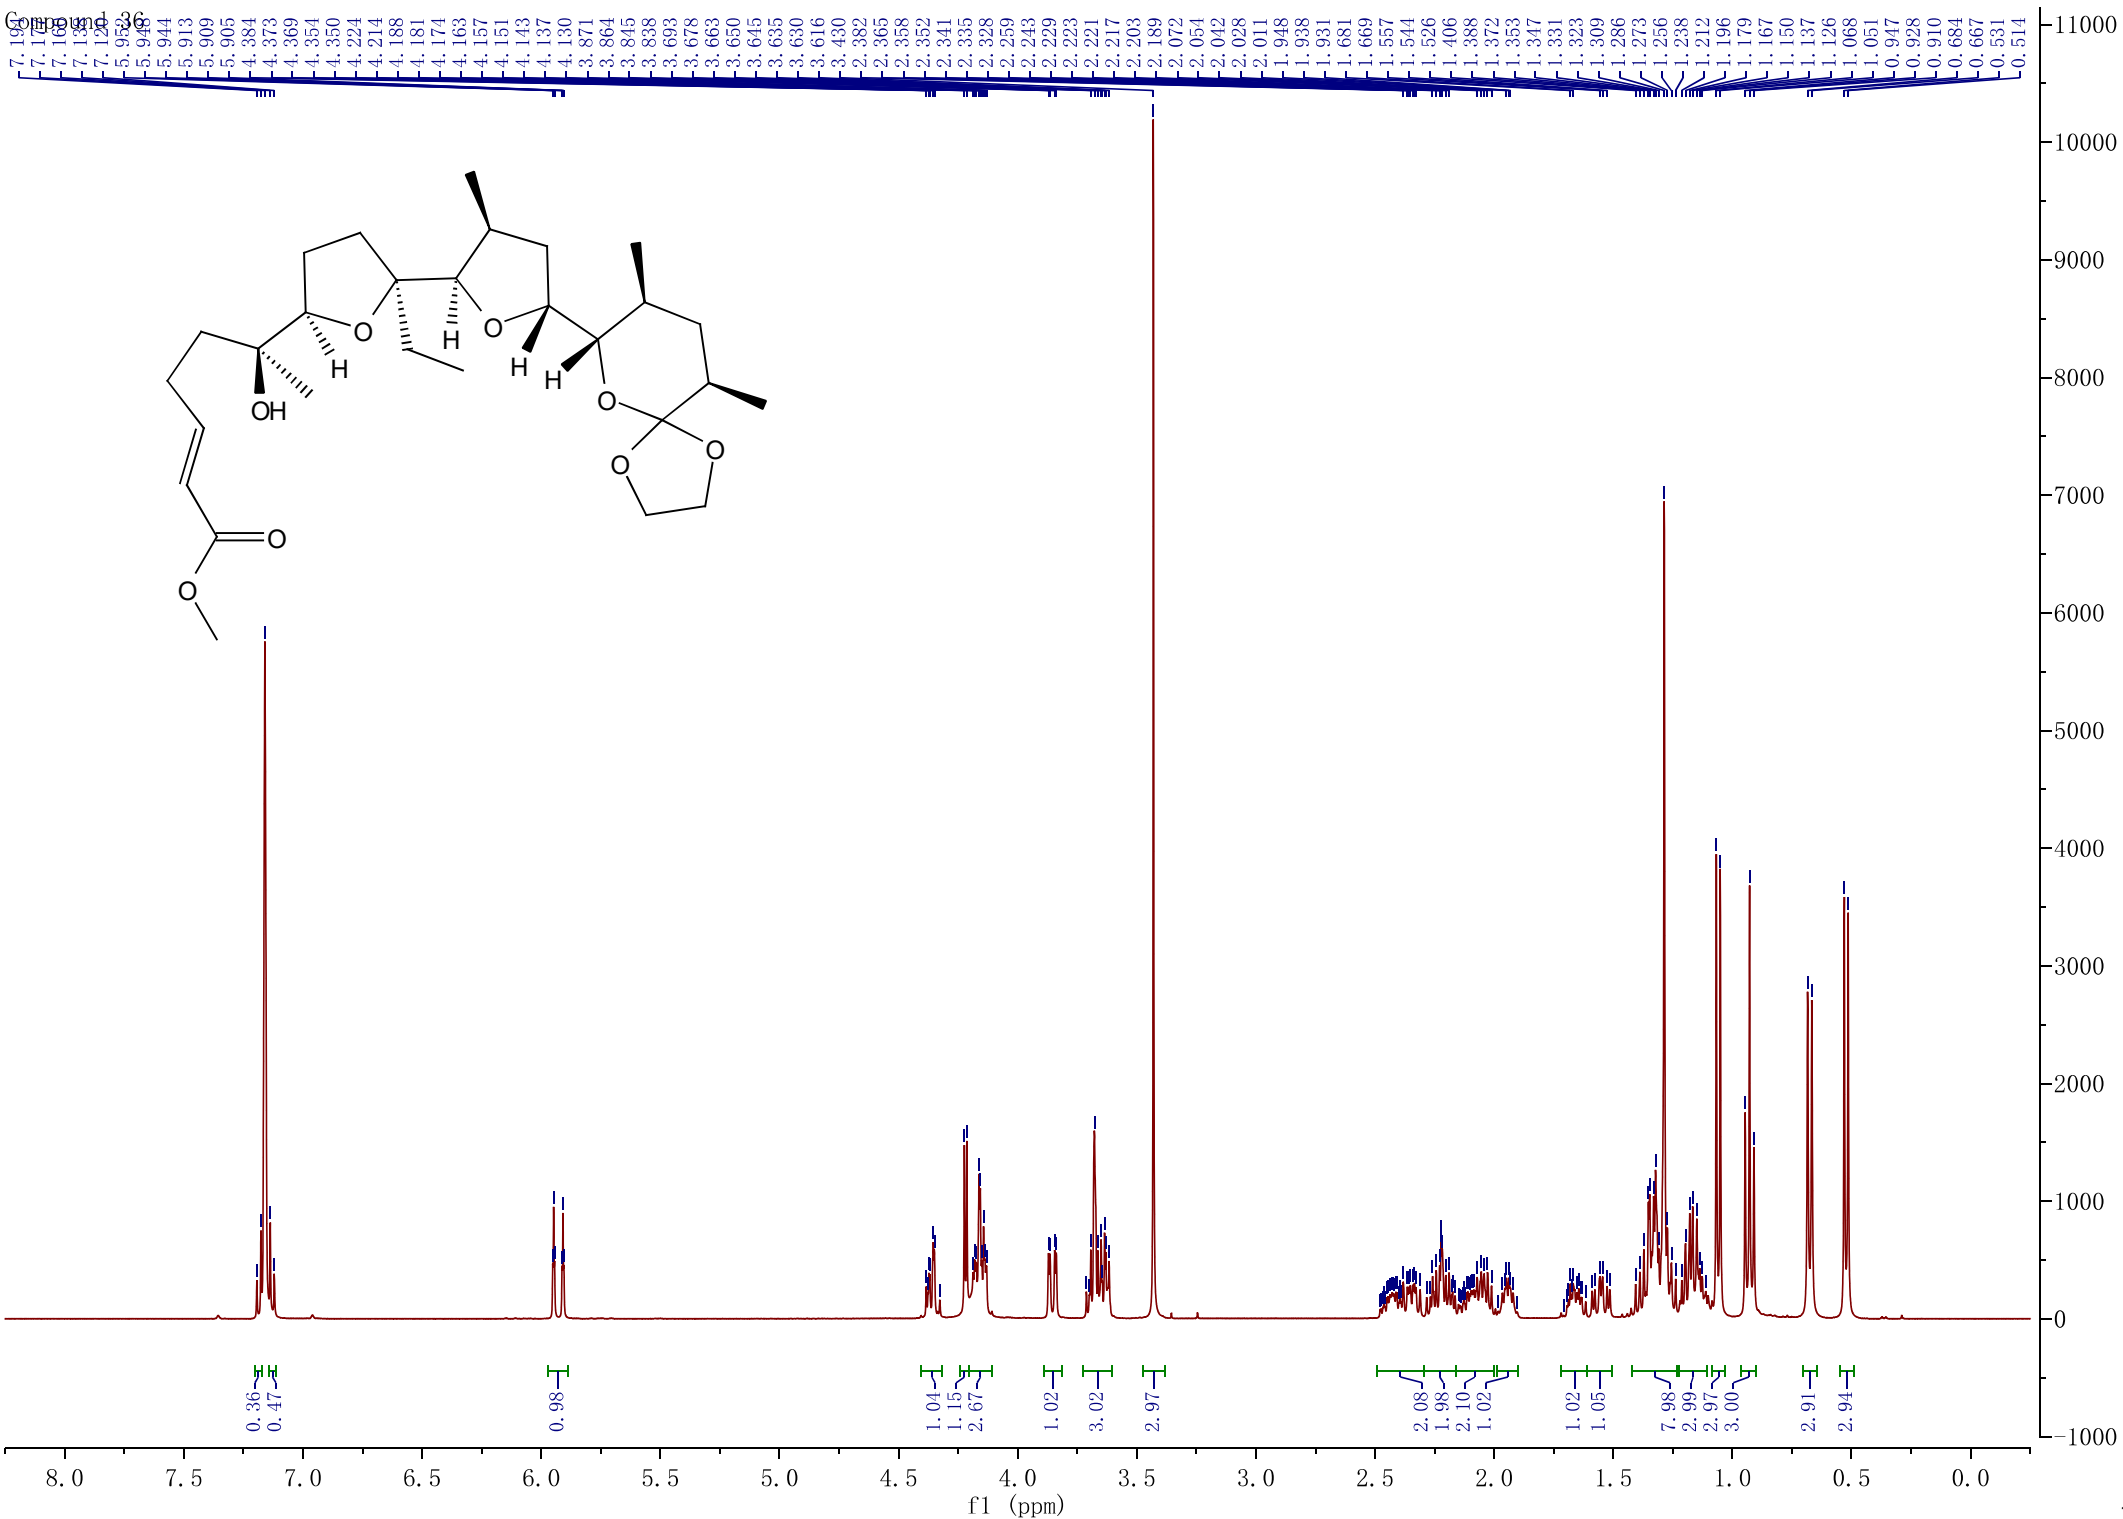

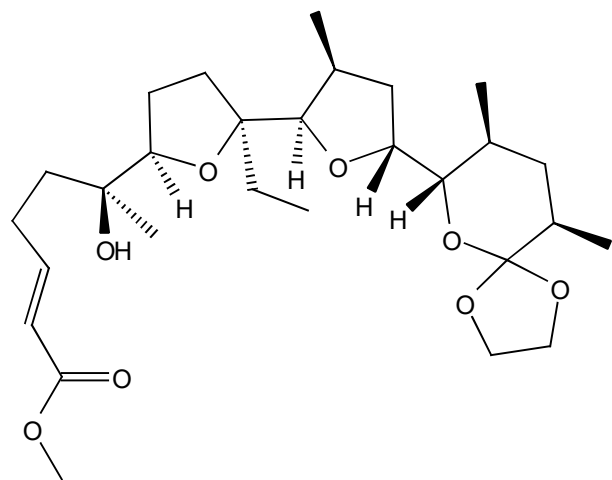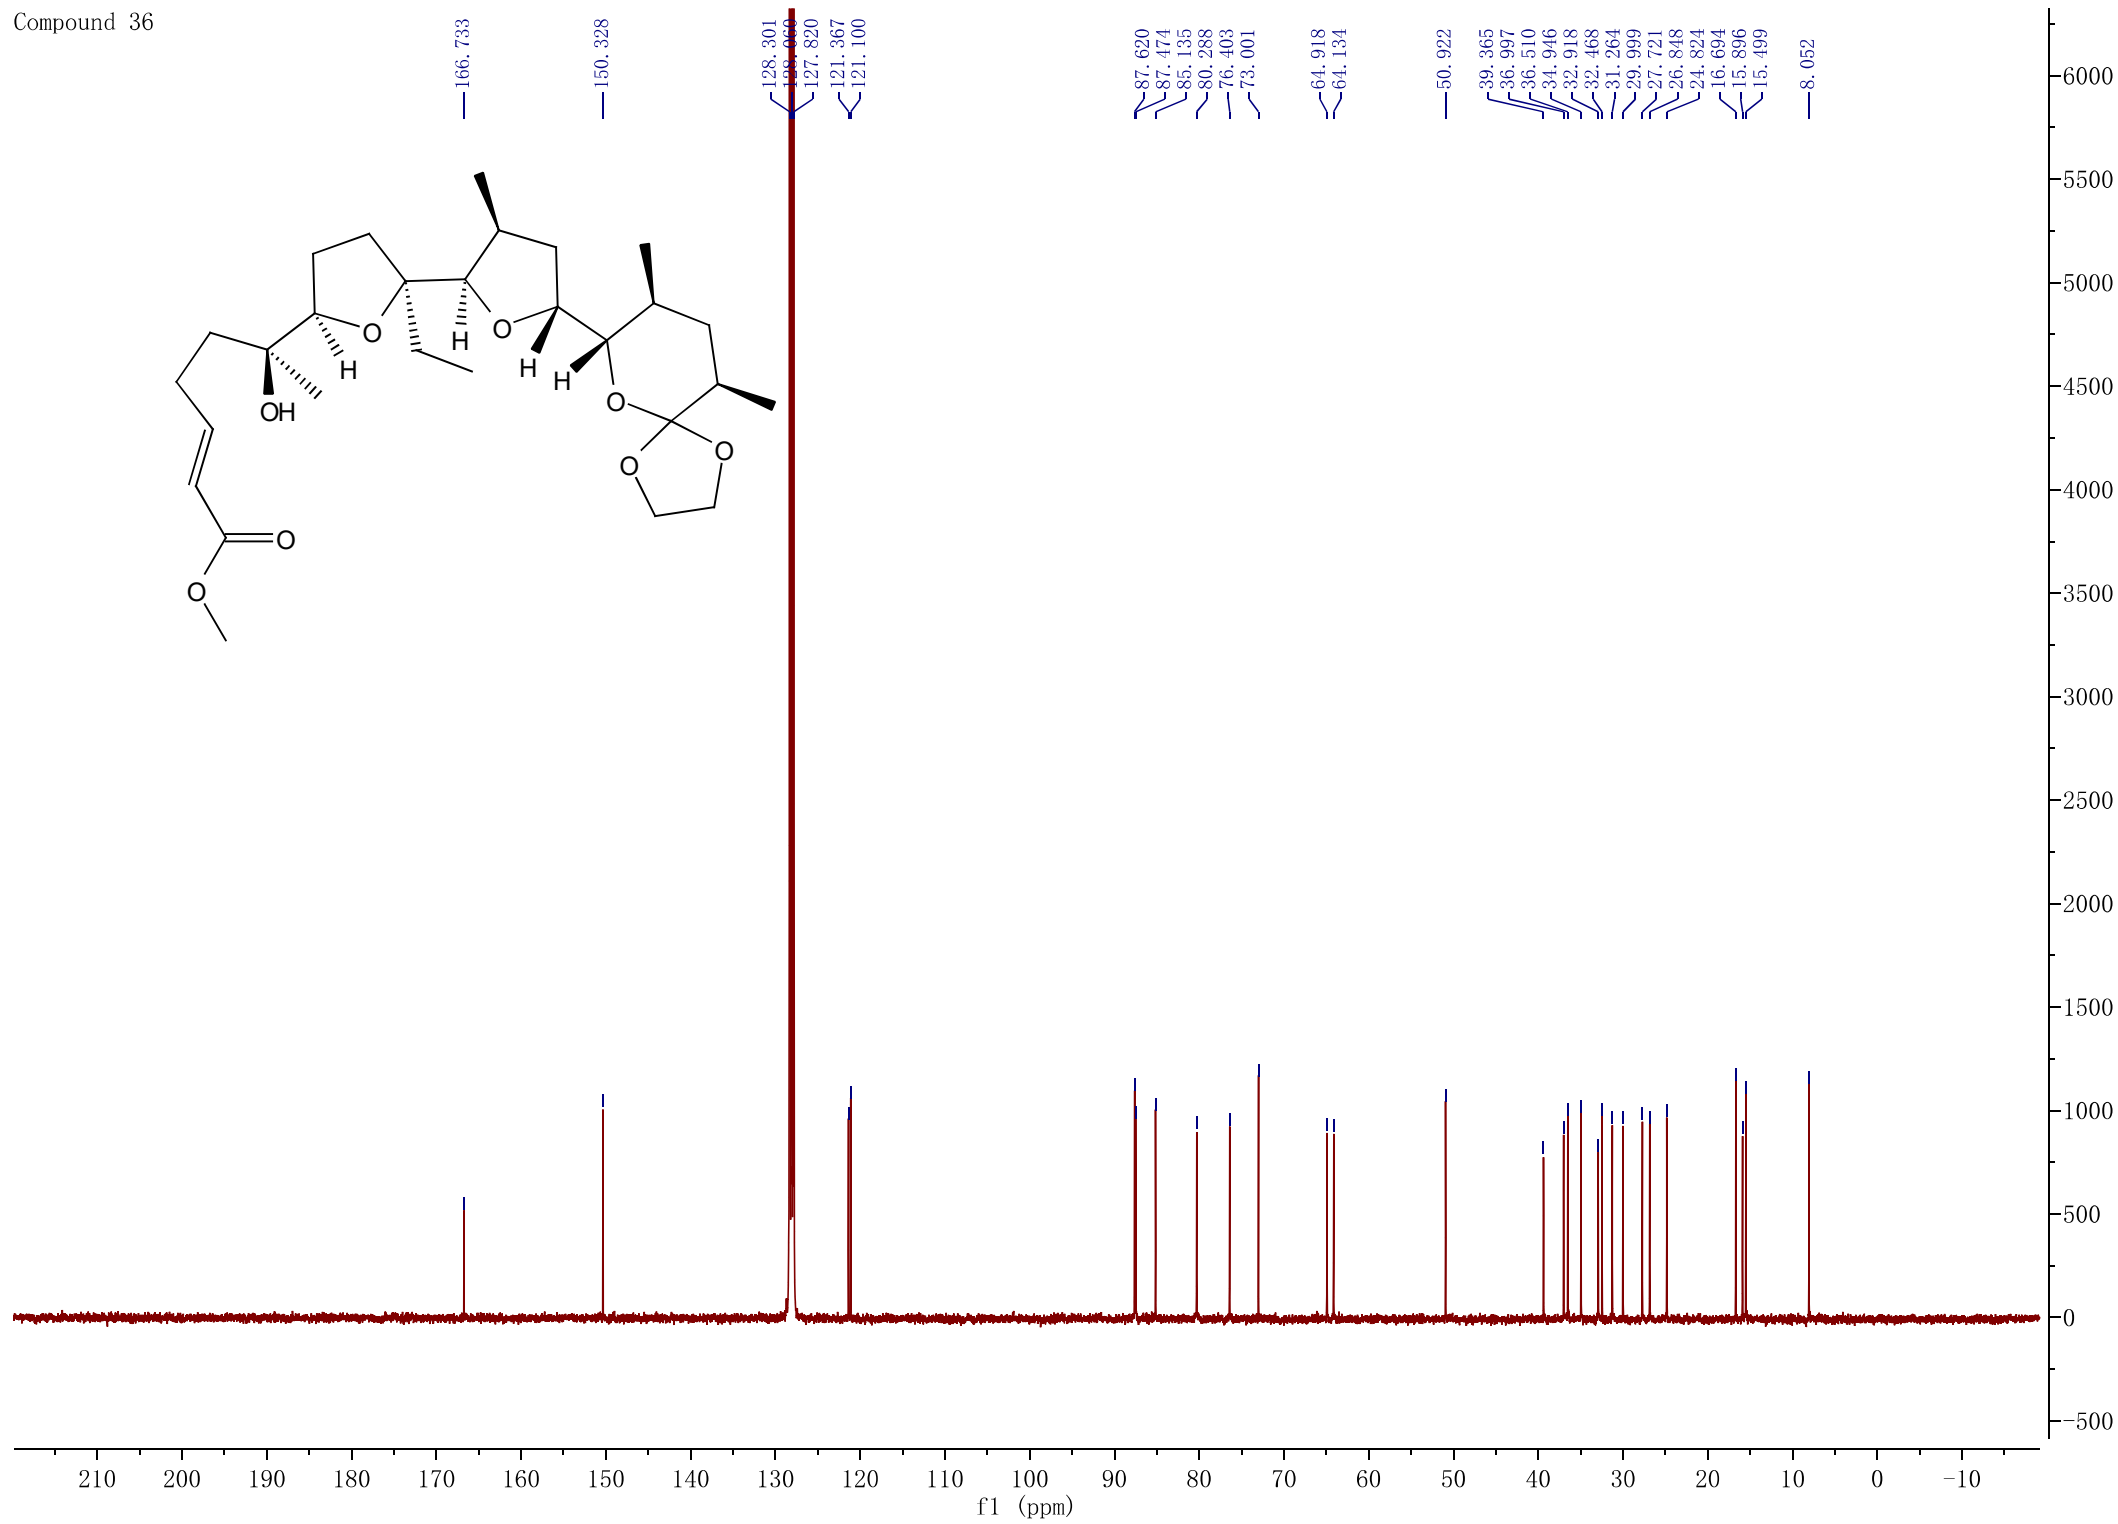

Compound 39

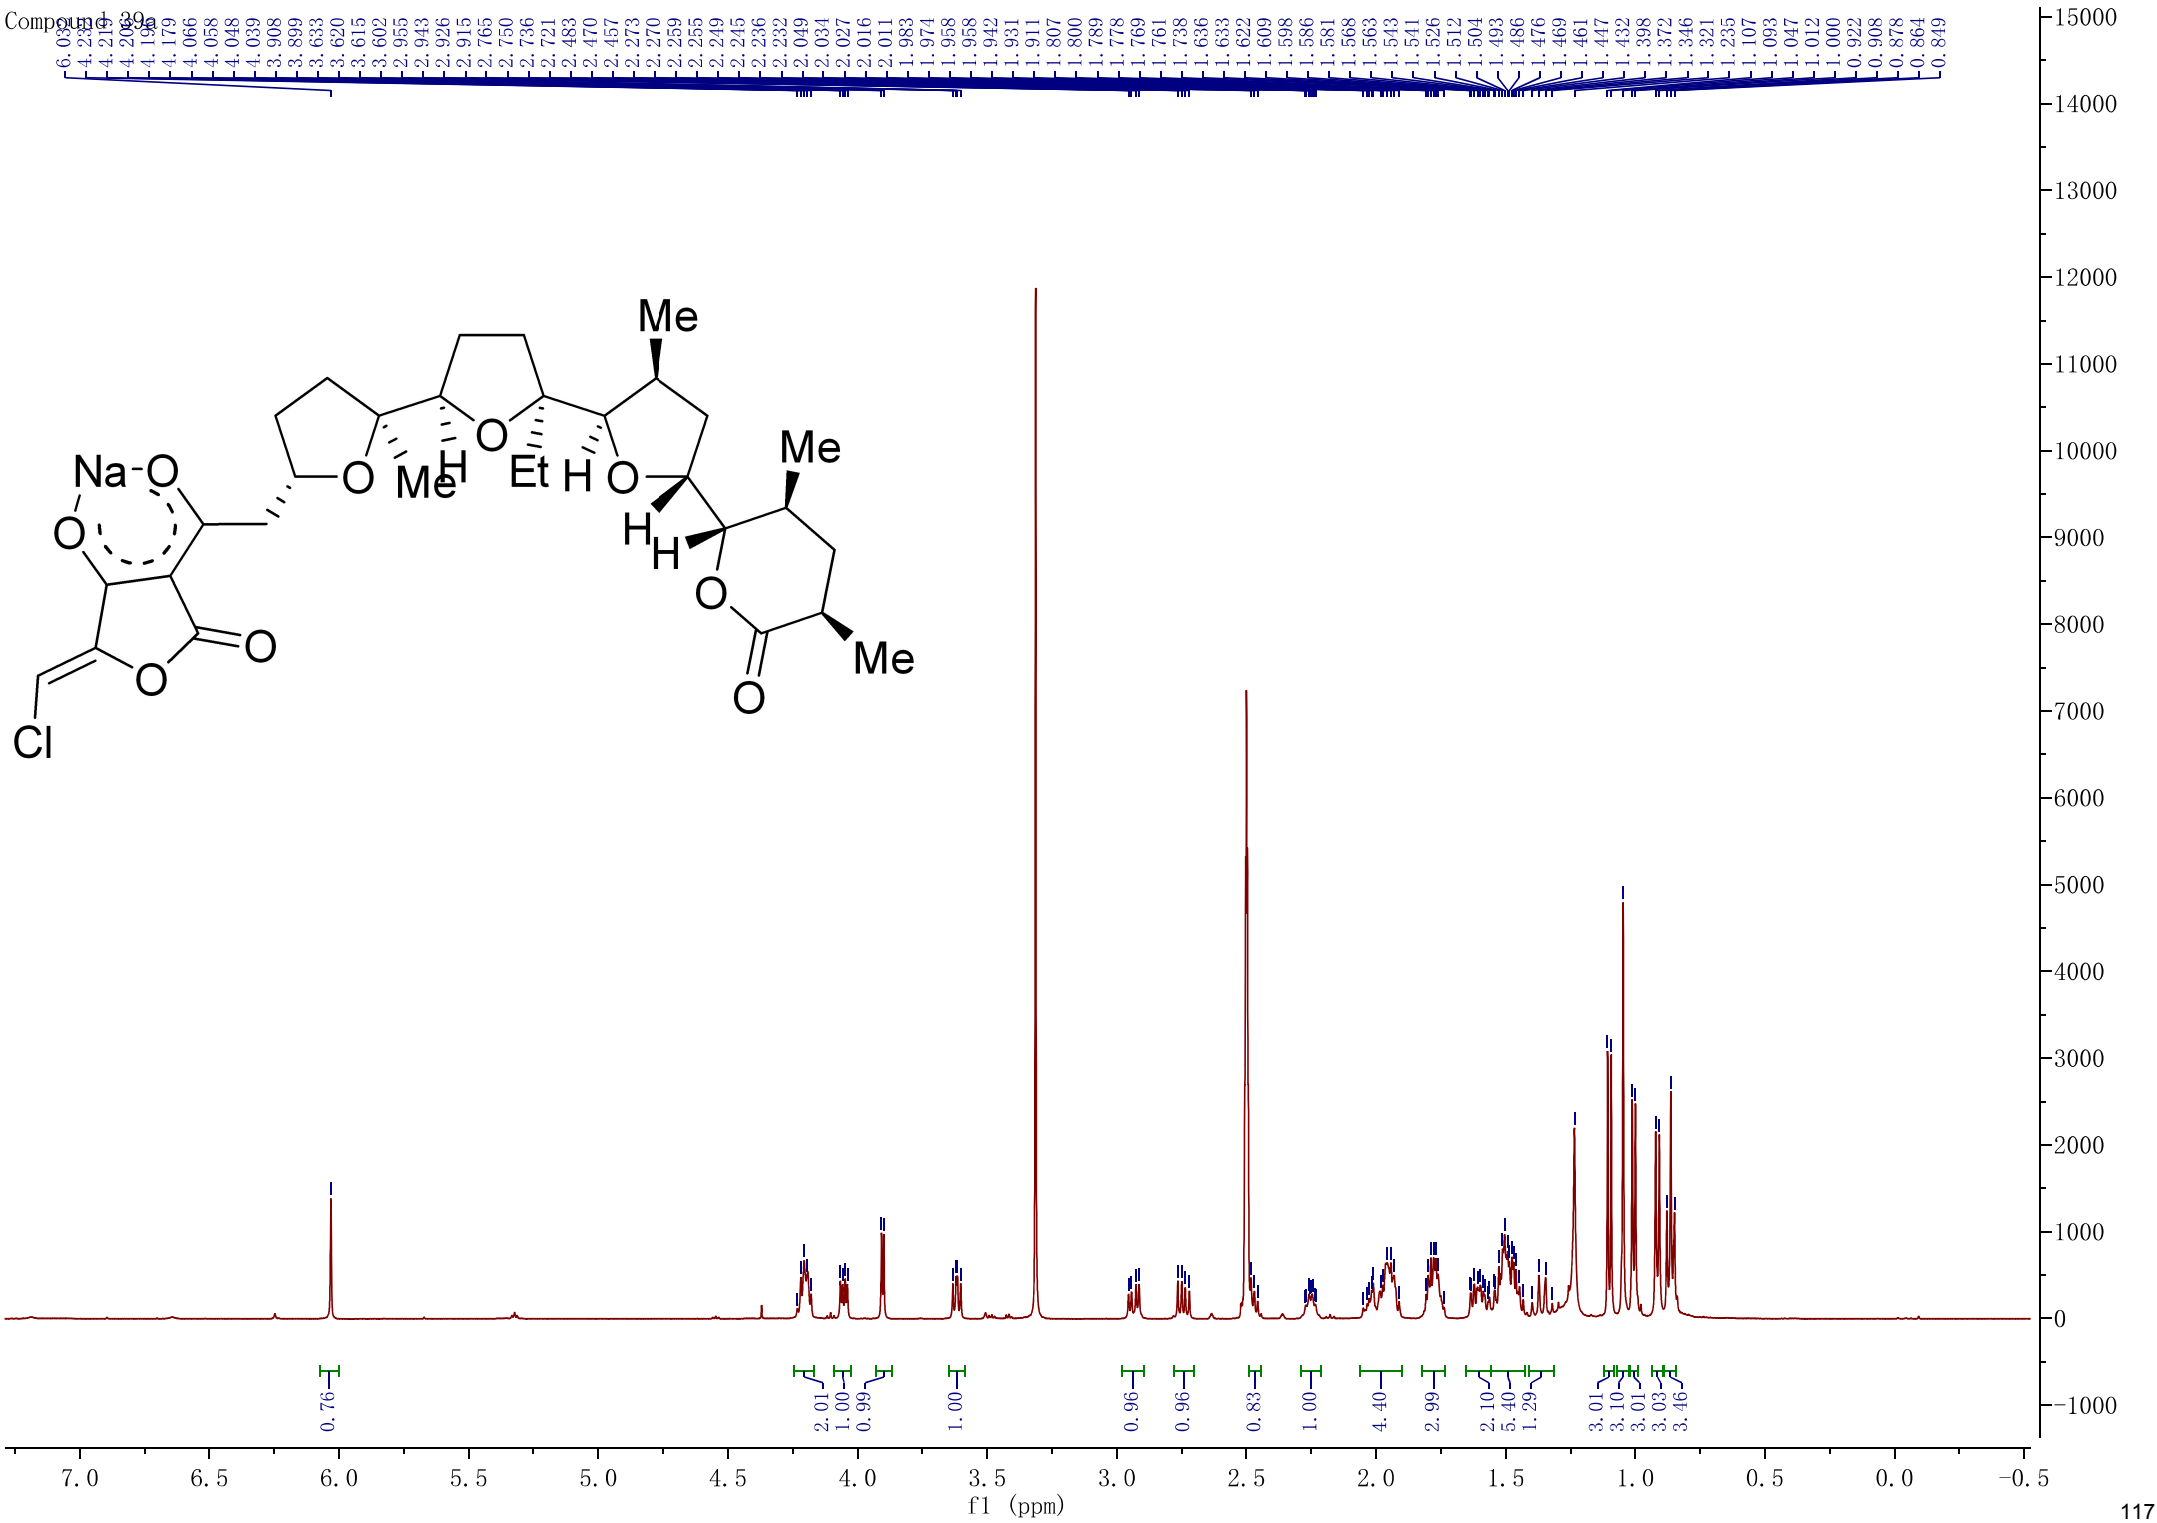

Compound 39a

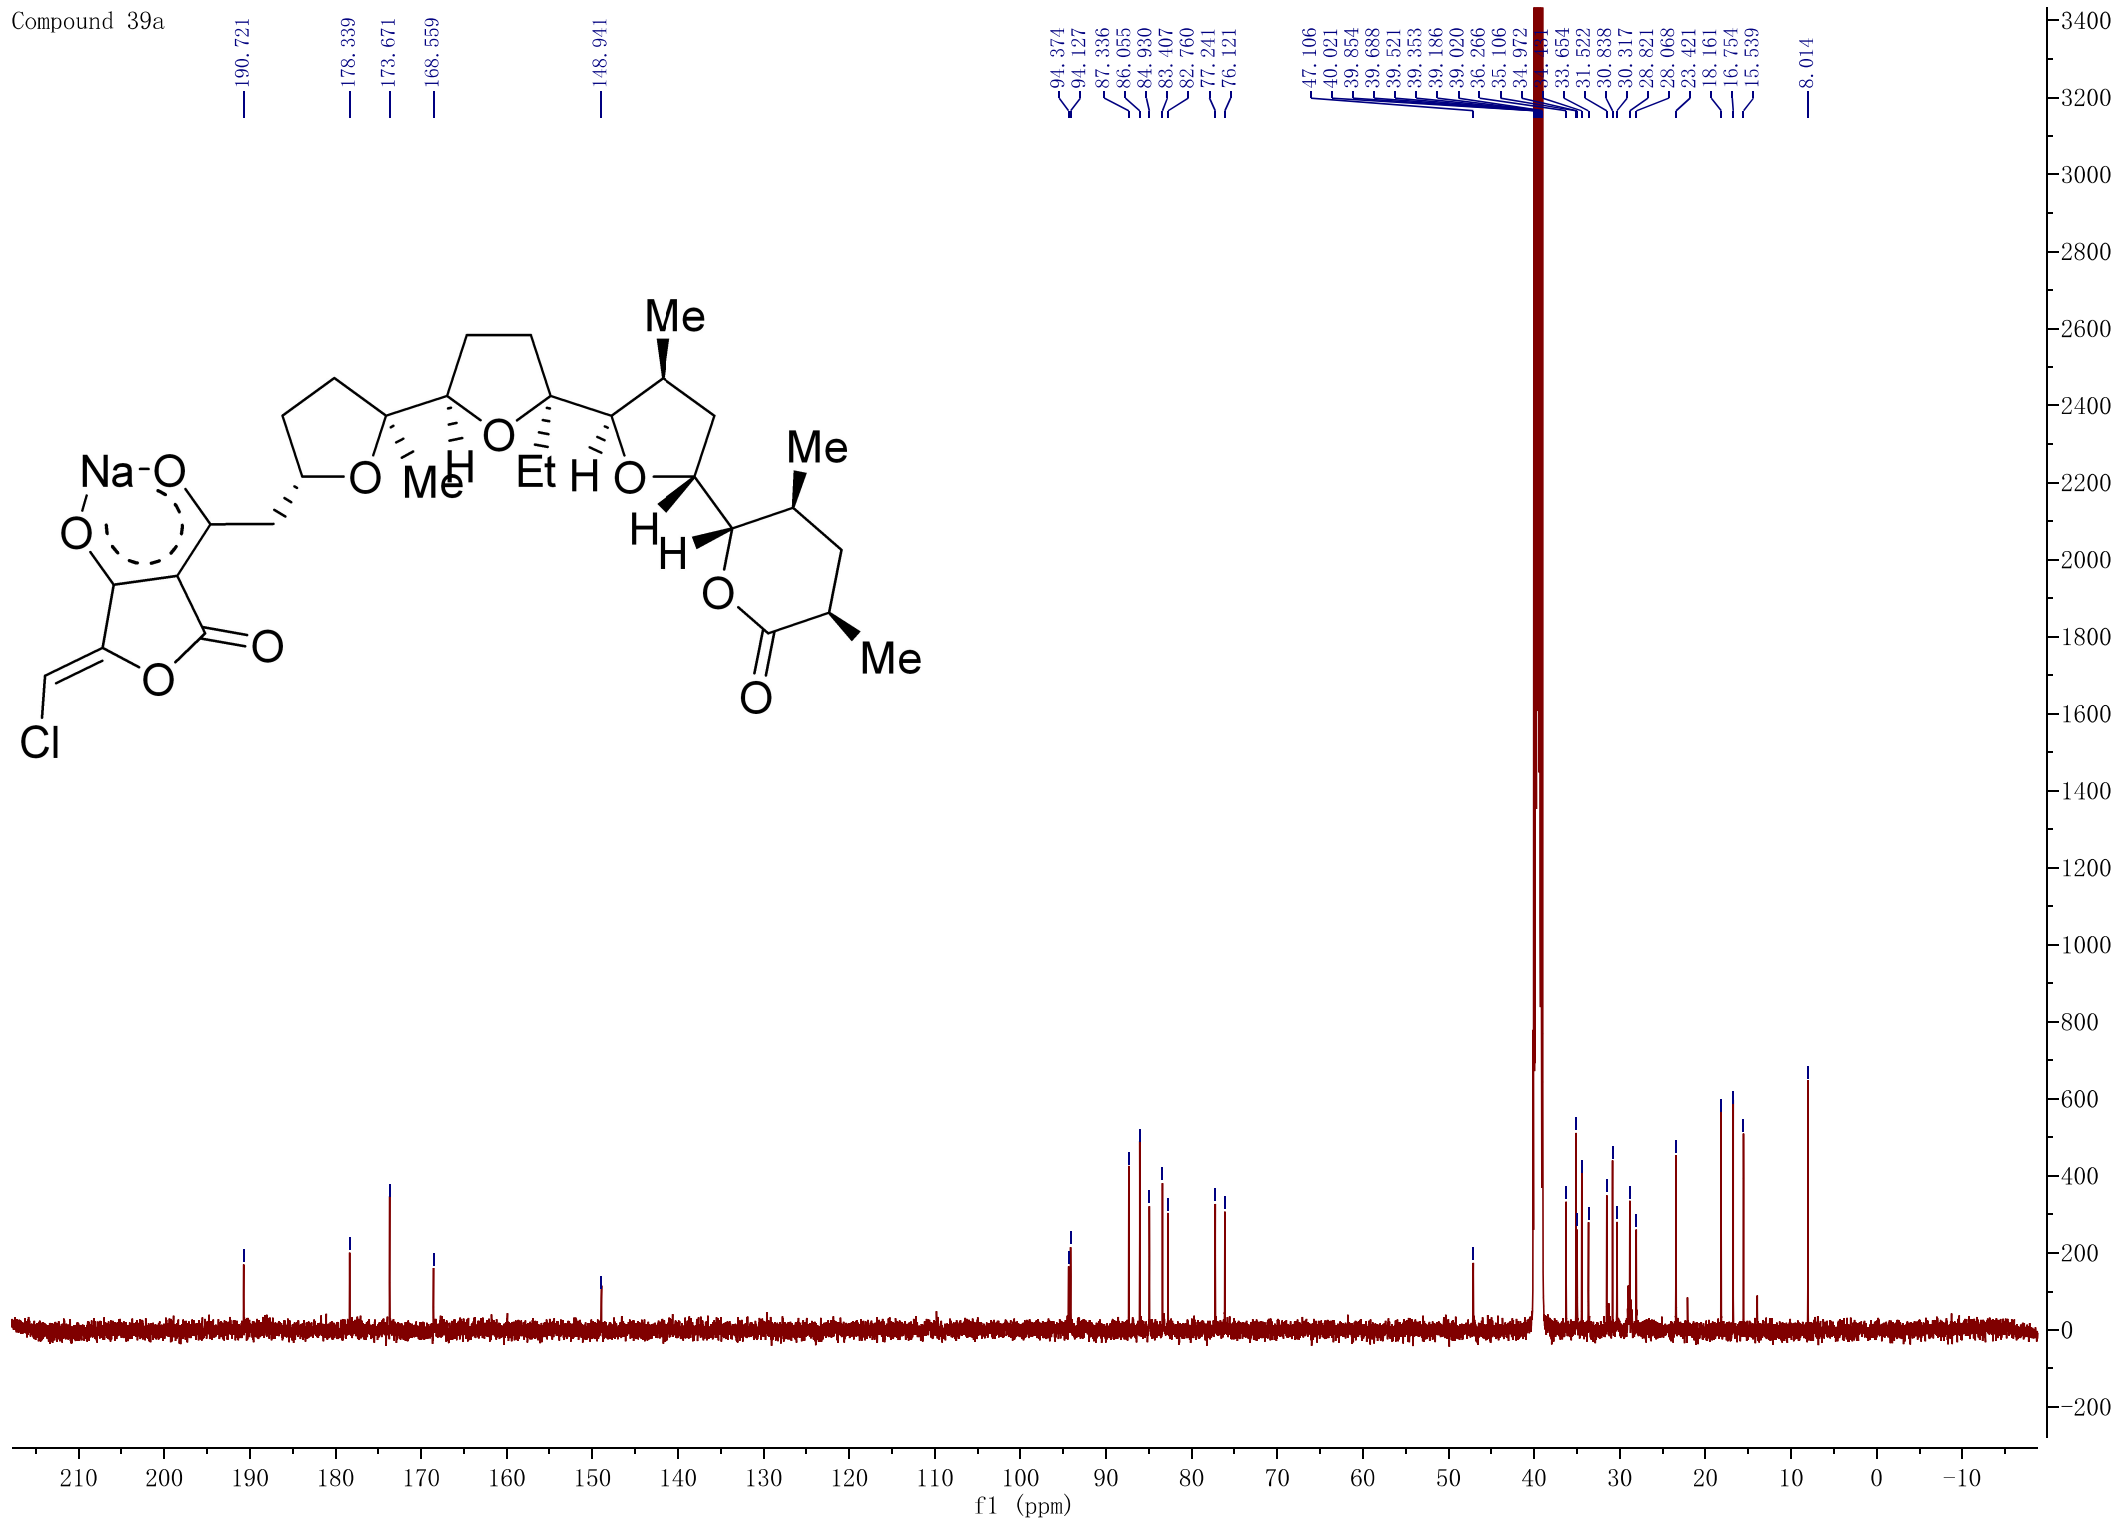



Compound 39b

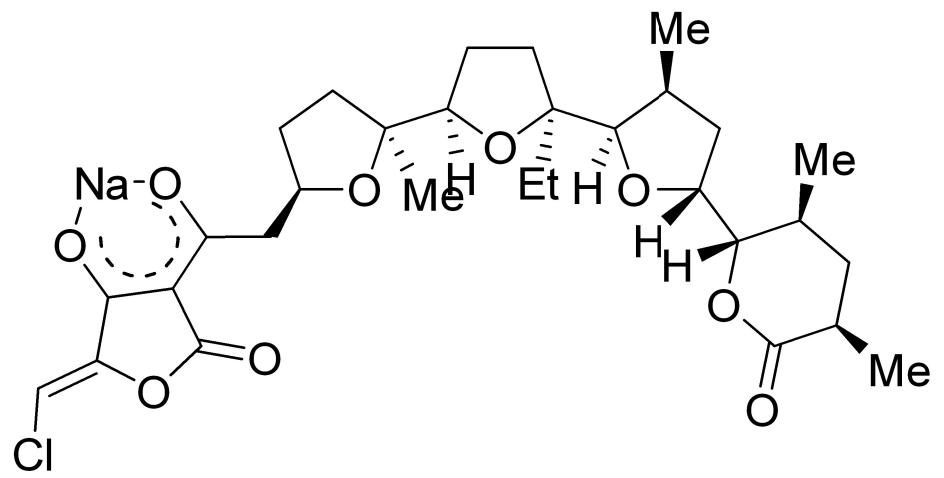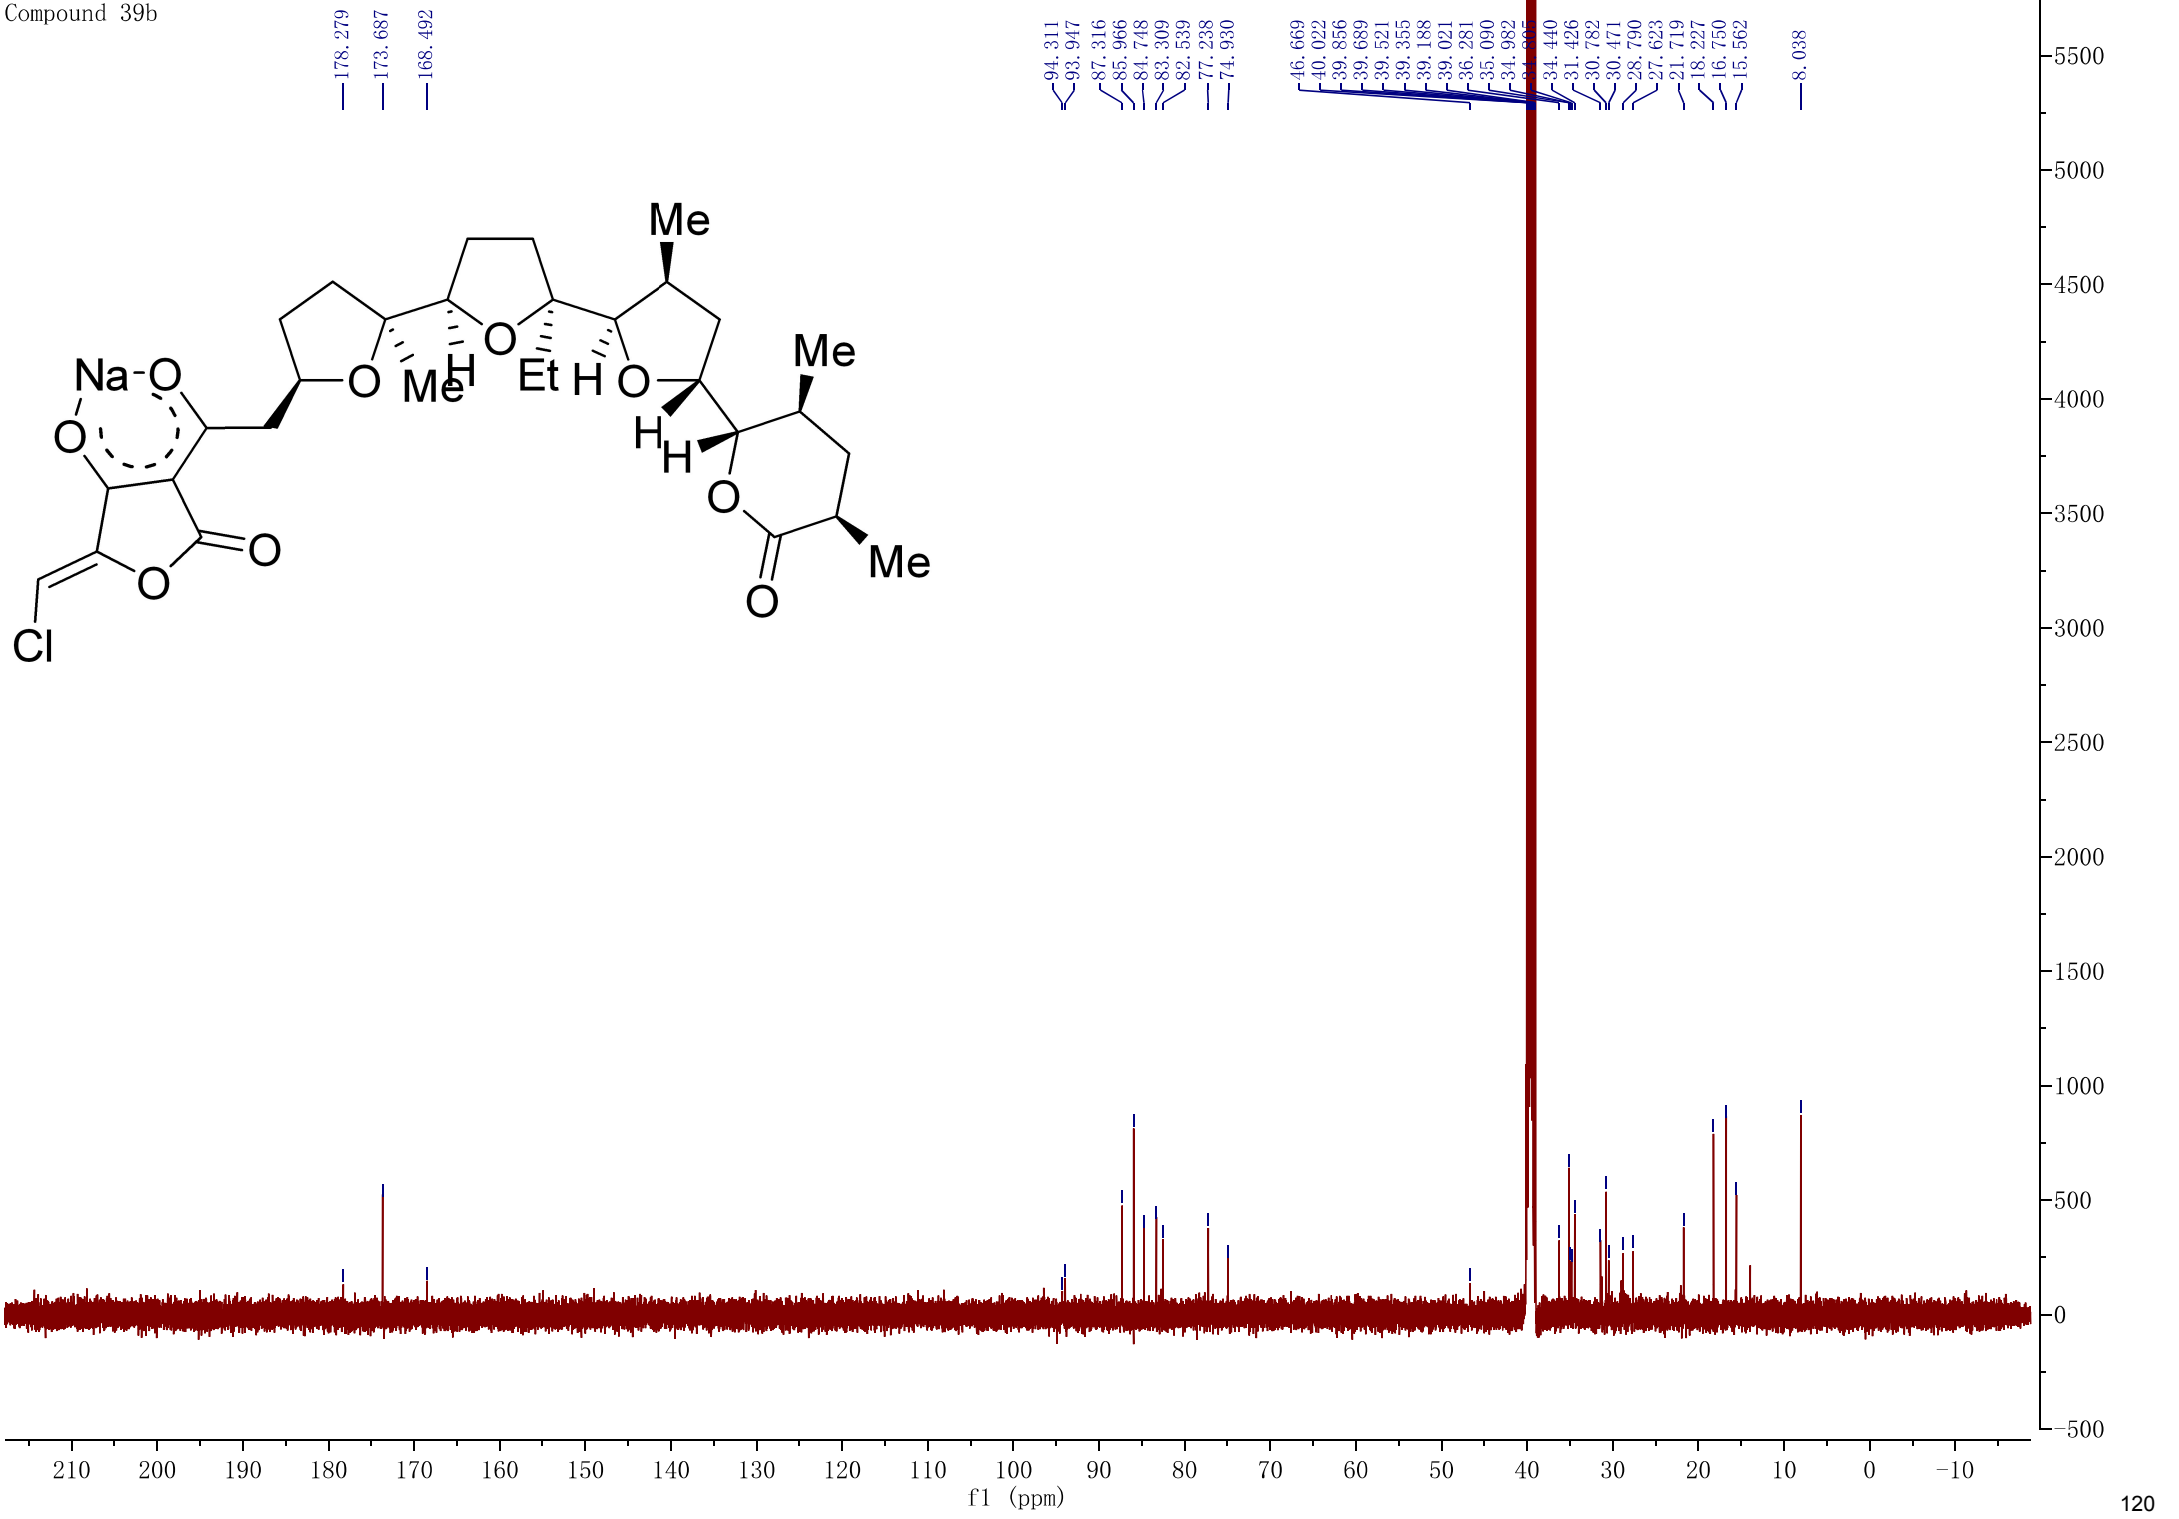

Supplement: EMS118654-supplement-Supplementary_Information.pdf [file EMS118654-supplement-Supplementary_Information.pdf]
